# Supplementary material for: Averting wheat blast by implementing a ‘wheat holiday’: In search of alternative crops in West Bengal, India
Source: PubMed Central journal article supplement (PMC6382110; doi:10.1371/journal.pone.0211410), 2019-02-20
Supplement: pone.0211410.s003.pdf [file pone.0211410.s003.pdf]

**FARM HARVEST PRICES OF  
PRINCIPAL CROPS IN INDIA**

**2015-2016**

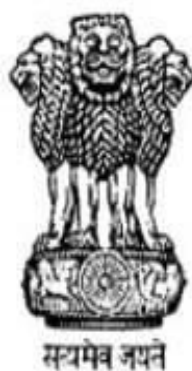

**DIRECTORATE OF ECONOMICS AND STATISTICS  
DEPARTMENT OF AGRICULTURE, COOPERATION AND  
FARMERS WELFARE  
MINISTRY OF AGRICULTURE AND FARMERS WELFARE  
GOVERNMENT OF INDIA  
NEW DELHI  
DECEMBER, 2017**

पुष्पा थोट्टन  
सलाहकार

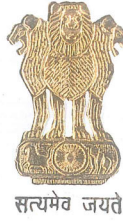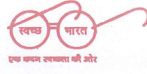

Pushpa Thottan  
Adviser

भारत सरकार,  
कृषि एवं किसान कल्याण मंत्रालय  
कृषि, सहकारिता एवं किसान कल्याण विभाग  
अर्थ एवं सांख्यिकी निदेशालय  
कृषि भवन/शास्त्री भवन  
नई दिल्ली-110001

Government of India,  
Ministry of Agriculture & Farmers Welfare  
Department of Agriculture, Cooperation & Farmers Welfare  
Directorate of Economics & Statistics  
Krishi Bhawan/Shastri Bhawan  
New Delhi - 110001

## FOREWORD

Directorate of Economics & Statistics, Ministry of Agriculture and Farmers Welfare has been bringing out "Farm Harvest Prices of Principal Crops in India" every year. The importance of this publication lies in the fact that data on farm gate prices facilitate fine-tuning of policies aimed to promote farmers' welfare. This issue contains data on farm harvest prices of principal crops for the year 2015-16, based on the returns received from the State Governments and Union Territories. A note on the methodology for collection of data on farm harvest prices and the particulars of harvesting seasons of principal crops in the major growing States has been provided at the end of the statistical tables. The data presented in this publication are available on the website: <http://eands.dacnet.nic.in/> of the Ministry of Agriculture and Farmers Welfare.

The detailed work has been carried out by the Price and Market Division, Directorate of Economics & Statistics, Ministry of Agriculture & Farmers Welfare under the overall guidance and supervision of Shri B.L. Meena, Additional Economic Adviser. We are grateful to the States which have given us timely information for inclusion in this volume and solicit the continued cooperation of all States in the future.

It is hoped that the publication would be useful for a wide range of researchers and policy makers. We welcome suggestions for improvement of this publication.

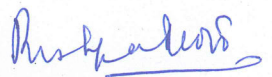  
(Pushpa Thottan)

NEW DELHI  
DECEMBER, 2017



बत्तू लाल मीणा, आई ई एस  
अतिरिक्त आर्थिक सलाहकार

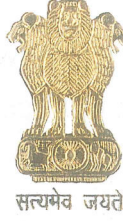

B. L. Meena, IES  
Additional Economic Adviser

भारत सरकार,  
कृषि एवं किसान कल्याण मंत्रालय  
कृषि एवं सहकारिता विभाग  
अर्थ एवं सांख्यिकी निदेशालय  
कृषि भवन/शास्त्री भवन  
नई दिल्ली-110001

Government of India,  
Ministry of Agriculture & Farmers Welfare  
Department of Agriculture & Cooperation  
Directorate of Economics & Statistics  
Krishi Bhawan/Shastri Bhawan  
New Delhi - 110001

## PREFACE

“Farm Harvest Prices of Principal Crops in India” is a publication, which is being brought out every year by the Directorate of Economics and Statistics of the Ministry of Agriculture & Farmers Welfare. The present volume contains information on farm harvest prices of 35 principal agricultural crops for the year 2015-2016, which have been compiled on the basis of information sent by all States and Union Territories. Agricultural crops covered are Paddy, Rice, Jowar, Bajra, Maize, Ragi, Wheat, Barley, Gram, Arhar, Sugar Raw (Gur), Sugarcane, Potato, Tobacco, Groundnut, Rapeseed, Sesamum, Linseed, Castor seed, Nigerseed, Soyabean, Sunflower, Cotton, Jute, Sannhemp, Mesta, Pepper, Ginger, Chilly, Turmeric, Arecanut, Banana, Tapioca, Coconut and Cashewnut.

Task of collection, compilation and presentation of farm harvest prices data for this publication has been carried out by the staff of Price and Market Division under the supervision of Shri Rakesh Agrawal, Deputy Director and Smt. Swathi S.Senan, Economic Officer. The staff members associated with the preparation of this publication are:

1. Smt. Jaishree Kumar, Senior Statistical Officer
2. Smt. Suman Devi, Junior Statistical Officer
3. Smt. Anita Bhatnagar, Technical Assistant
4. Shri. Hemendra Kumar Meena, Junior Statistical Officer
5. Shri. Anurag Bhullar, Junior Statistical Officer
6. Shri. Udai Pal, DEO (Grade-C)

Sincere efforts have been taken to bring out this publication. Suggestions for improvement are most welcome.

(B.L. Meena)

NEW DELHI  
DECEMBER, 2017

## CONTENTS

| <b>Table No.</b> | <b><u>SUBJECT</u></b>                                                                            | <b>Page No.</b> |
|------------------|--------------------------------------------------------------------------------------------------|-----------------|
| 1                | Crop-wise State-wise Weighted average of Farm Harvest Prices of Principal Crops In India 2014-15 | 1-12            |
| 2                | Crop-wise District-wise Farm Harvest Prices of Principal Crops in India                          |                 |
| 2.1              | Andhra Pradesh                                                                                   | 13-16           |
| 2.2              | Andaman & Nicobar                                                                                | 17              |
| 2.3              | Assam                                                                                            | 18-19           |
| 2.4              | Bihar                                                                                            | 20-23           |
| 2.5              | Chandigarh                                                                                       | 24              |
| 2.6              | Chhattisgarh                                                                                     | 25-26           |
| 2.7              | Delhi                                                                                            | 27              |
| 2.8              | Goa                                                                                              | 28              |
| 2.9              | Gujarat                                                                                          | 29-31           |
| 2.10             | Haryana                                                                                          | 32-33           |
| 2.11             | Himachal Pradesh                                                                                 | 34-35           |
| 2.12             | Jammu & Kashmir                                                                                  | 36-37           |
| 2.13             | Jharkhand                                                                                        | 38-40           |
| 2.14             | Karnataka                                                                                        | 41-46           |
| 2.15             | Kerala                                                                                           | 47-48           |
| 2.16             | Madhya Pradesh                                                                                   | 49-52           |
| 2.17             | Maharashtra                                                                                      | 53-55           |
| 2.18             | Manipur                                                                                          | 56              |
| 2.19             | Mizoram                                                                                          | 57              |
| 2.20             | Nagaland                                                                                         | 58              |
| 2.21             | Odisha                                                                                           | 59-61           |
| 2.22             | Pondicherry                                                                                      | 62              |
| 2.23             | Punjab                                                                                           | 63-64           |
| 2.24             | Rajasthan                                                                                        | 65-67           |
| 2.25             | Tamil Nadu                                                                                       | 68-70           |
| 2.26             | Telangana                                                                                        | 71-72           |
| 2.27             | Tripura                                                                                          | 73              |
| 2.28             | Uttar Pradesh                                                                                    | 74-76           |
| 2.29             | Uttarakhand                                                                                      | 77              |
| 2.30             | West Bengal                                                                                      | 78-79           |

## APPENDIX

|     |                                                               |       |
|-----|---------------------------------------------------------------|-------|
| I   | Methodology for Collection of Farm Harvest Prices             | 80-82 |
| II  | Harvesting Seasons of Principal Crops in Major Growing States | 83-94 |
| III | Minimum Support Price                                         | 95    |

**Table 1 Crop-wise State-wise Weighted Average\* of Farm Harvest Prices of Principal Crops in India**

(Rs.per Quintal)

| Crop Name  | Variety  | Year    | Season \$ | Andhra Pradesh | Andman & Nicobar | Assam | Bihar | Chandigarh | Chhattisgarh | Delhi | Goa   | Gujarat | Haryana | Himachal Pradesh | Jammu & Kashmir |   |
|------------|----------|---------|-----------|----------------|------------------|-------|-------|------------|--------------|-------|-------|---------|---------|------------------|-----------------|---|
| Areca nut  | -        | 2015-16 | -         | -              | 17500            | 2961  | -     | -          | -            | -     | 23000 | -       | -       | -                | -               |   |
|            |          |         | Kharif    | -              | -                | -     | -     | -          | -            | -     | -     | -       | -       | -                | -               | - |
|            |          |         | Summer    | -              | -                | -     | -     | -          | -            | -     | -     | -       | -       | -                | -               | - |
| Bajra      | -        | 2015-16 | -         | 1384           | -                | -     | -     | -          | 2197         | 1650  | -     | -       | 1329    | -                | 1157            |   |
|            |          |         | Kharif    | 1387           | -                | -     | 1177  | -          | -            | -     | -     | 1261    | 1329    | -                | -               |   |
|            |          |         | Rabi      | 1327           | -                | -     | -     | -          | -            | -     | -     | -       | -       | -                | -               | - |
|            |          |         | Summer    | -              | -                | -     | -     | -          | -            | -     | -     | -       | -       | -                | -               | - |
| Banana     | -        | 2015-16 | -         | -              | -                | -     | -     | -          | -            | -     | -     | -       | -       | -                |                 |   |
| Barley     | -        | 2015-16 | -         | -              | -                | -     | -     | -          | 2001         | 1450  | -     | -       | -       | 1967             | 1555            |   |
|            |          |         | Rabi      | -              | -                | -     | 1144  | -          | -            | -     | -     | -       | -       | -                | -               |   |
| Cashewnut  | -        | 2015-16 | -         | -              | -                | -     | -     | -          | -            | -     | 12200 | -       | -       | -                | -               |   |
|            |          |         | Summer    | -              | -                | -     | -     | -          | -            | -     | -     | -       | -       | -                | -               |   |
|            | Raw      | 2015-16 | -         | -              | 5000             | -     | -     | -          | -            | -     | -     | -       | -       | -                |                 |   |
| CasterSeed | -        | 2015-16 | -         | 3011           | -                | 7500  | -     | -          | 2220         | -     | -     | 3794    | -       | -                | -               |   |
|            |          |         | Kharif    | 3011           | -                | -     | -     | -          | -            | -     | -     | -       | -       | -                | -               |   |
|            |          |         | Rabi      | -              | -                | -     | -     | -          | -            | -     | -     | -       | -       | -                | -               |   |
| Chilly     | -        | 2015-16 | -         | -              | -                | -     | -     | -          | -            | -     | -     | -       | -       | 12775            | 8528            |   |
|            |          |         | Kharif    | -              | -                | -     | -     | -          | -            | -     | -     | -       | 5984    | -                | -               |   |
|            |          |         | Rabi      | -              | -                | -     | 5691  | -          | -            | -     | -     | -       | -       | -                | -               |   |
|            | Dry      | 2015-16 | -         | 11321          | -                | -     | -     | -          | -            | 11180 | -     | -       | 10237   | -                | -               |   |
|            |          |         | Kharif    | 11204          | -                | -     | -     | -          | -            | -     | -     | -       | -       | -                | -               |   |
|            |          |         | Rabi      | 12045          | -                | -     | -     | -          | -            | -     | -     | -       | -       | -                | -               |   |
| Green      | 2015-16  | -       | -         | 11250          | -                | -     | -     | -          | -            | -     | -     | -       | -       |                  |                 |   |
| Coconut    | -        | 2015-16 | -         | -              | -                | -     | -     | -          | -            | -     | -     | -       | -       | -                | -               |   |
|            |          |         | Kharif    | -              | -                | -     | -     | -          | -            | -     | -     | -       | -       | -                | -               |   |
|            |          |         | Rabi      | -              | -                | -     | -     | -          | -            | -     | -     | -       | -       | -                | -               |   |
|            |          |         | Summer    | -              | -                | -     | -     | -          | -            | -     | -     | -       | -       | -                | -               |   |
| Cotton     | -        | 2015-16 | -         | 4035           | -                | 4693  | -     | -          | -            | -     | -     | -       | -       | -                | -               |   |
|            |          |         | Kharif    | 4034           | -                | -     | -     | -          | -            | -     | -     | -       | -       | -                | -               |   |
|            |          |         | Rabi      | -              | -                | -     | -     | -          | -            | -     | -     | -       | -       | -                | -               |   |
|            |          |         | Summer    | -              | -                | -     | -     | -          | -            | -     | -     | -       | -       | -                | -               |   |
|            | American | 2015-16 | -         | -              | -                | -     | -     | -          | -            | -     | -     | -       | -       | -                | -               |   |
|            |          |         | Kharif    | -              | -                | -     | -     | -          | -            | -     | -     | -       | -       | 5021             | -               |   |
|            | Desi     | 2015-16 | -         | -              | -                | -     | -     | -          | -            | -     | -     | -       | 3088    | -                | -               |   |
|            |          |         | Kharif    | -              | -                | -     | -     | -          | -            | -     | -     | -       | -       | 5371             | -               |   |
| Hybrid     | 2015-16  | -       | -         | -              | -                | -     | -     | -          | -            | -     | 4078  | -       | -       |                  |                 |   |

**Table 1 (Contd.) Crop-wise State-wise Weighted Average\* of Farm Harvest Prices of Principal Crops in India**

(Rs.per Quintal)

| Crop Name  | Variety  | Year    | Season \$ | Jharkhand | Karnataka | Kerala | Maharashtra | Manipur | Mizoram | Nagaland | Orissa | Pondicherry | Punjab | Rajasthan | Tamil Nadu |       |
|------------|----------|---------|-----------|-----------|-----------|--------|-------------|---------|---------|----------|--------|-------------|--------|-----------|------------|-------|
| Arecanut   | -        | 2015-16 | -         | -         | -         | -      | -           | -       | -       | -        | -      | -           | -      | -         | 20861      |       |
|            |          |         | Kharif    | -         | 23899     | -      | -           | -       | -       | -        | -      | -           | -      | -         | -          | -     |
|            |          |         | Summer    | -         | 26281     | -      | -           | -       | -       | -        | -      | -           | -      | -         | -          | -     |
| Bajra      | -        | 2015-16 | -         | -         | -         | -      | 1454        | -       | -       | -        | -      | 1538        | -      | -         | -          |       |
|            |          |         | Kharif    | -         | 1339      | -      | -           | -       | -       | -        | -      | -           | -      | -         | 1267       | -     |
|            |          |         | Rabi      | -         | -         | -      | -           | -       | -       | -        | -      | -           | -      | -         | -          | -     |
|            |          |         | Summer    | -         | 1678      | -      | -           | -       | -       | -        | -      | -           | -      | -         | -          | -     |
| Banana     | -        | 2015-16 | -         | -         | -         | 2939   | -           | -       | 1261    | -        | -      | -           | -      | -         | 2403       |       |
| Barley     | -        | 2015-16 | -         | -         | -         | -      | -           | -       | -       | -        | -      | -           | 1127   | -         | -          |       |
|            |          |         | Rabi      | 1486      | -         | -      | -           | -       | -       | -        | -      | -           | -      | -         | 1408       | -     |
| Cashewnut  | -        | 2015-16 | -         | -         | -         | -      | -           | -       | -       | -        | -      | -           | -      | -         | 10860      |       |
|            |          |         | Summer    | -         | 9075      | -      | -           | -       | -       | -        | -      | -           | -      | -         | -          | -     |
|            | Raw      | 2015-16 | -         | -         | -         | -      | -           | -       | -       | -        | -      | -           | -      | -         | -          |       |
| CasterSeed | -        | 2015-16 | -         | -         | -         | -      | 3051        | -       | -       | -        | -      | -           | -      | -         | -          | 4391  |
|            |          |         | Kharif    | -         | 3285      | -      | -           | -       | -       | -        | -      | -           | -      | -         | -          | -     |
|            |          |         | Rabi      | -         | -         | -      | -           | -       | -       | -        | -      | -           | -      | -         | -          | 3183  |
| Chilly     | -        | 2015-16 | -         | -         | -         | -      | -           | -       | 17010   | -        | -      | -           | -      | -         | -          | 10858 |
|            |          |         | Kharif    | -         | -         | -      | -           | -       | -       | -        | -      | -           | -      | -         | -          | -     |
|            |          |         | Rabi      | -         | -         | -      | -           | -       | -       | -        | -      | -           | -      | -         | -          | -     |
|            | Dry      | 2015-16 | -         | -         | -         | -      | -           | -       | -       | -        | -      | -           | -      | -         | -          | -     |
|            |          |         | Kharif    | -         | 7653      | -      | -           | -       | -       | -        | -      | -           | -      | -         | 10905      | -     |
|            | Rabi     | -       | -         | -         | -         | -      | -           | -       | -       | -        | -      | -           | -      | -         | -          |       |
| Green      | 2015-16  | -       | -         | -         | -         | -      | -           | -       | -       | -        | -      | -           | -      | -         | -          |       |
| Coconut    | -        | 2015-16 | -         | -         | -         | -      | -           | -       | 930     | -        | -      | -           | -      | -         | -          | -     |
|            |          |         | Kharif    | -         | 10998     | -      | -           | -       | -       | -        | -      | -           | -      | -         | -          | -     |
|            |          |         | Rabi      | -         | 7005      | -      | -           | -       | -       | -        | -      | -           | -      | -         | -          | -     |
|            |          |         | Summer    | -         | 10049     | -      | -           | -       | -       | -        | -      | -           | -      | -         | -          | -     |
| Cotton     | -        | 2015-16 | -         | -         | -         | -      | -           | -       | 4520    | -        | -      | 2799        | -      | -         | -          | 4326  |
|            |          |         | Kharif    | -         | 4415      | -      | -           | -       | -       | -        | -      | -           | -      | -         | 4565       | -     |
|            |          |         | Rabi      | -         | 4216      | -      | -           | -       | -       | -        | -      | -           | -      | -         | -          | -     |
|            |          |         | Summer    | -         | 4266      | -      | -           | -       | -       | -        | -      | -           | -      | -         | -          | -     |
|            | American | 2015-16 | -         | -         | -         | -      | -           | -       | -       | -        | -      | -           | -      | 4691      | -          | -     |
|            |          |         | Kharif    | -         | -         | -      | -           | -       | -       | -        | -      | -           | -      | -         | -          | -     |
|            | Desi     | 2015-16 | -         | -         | -         | -      | -           | -       | -       | -        | -      | -           | -      | 4240      | -          | -     |
|            |          |         | Kharif    | -         | -         | -      | -           | -       | -       | -        | -      | -           | -      | -         | -          | -     |
| Hybrid     | 2015-16  | -       | -         | -         | -         | -      | -           | -       | -       | -        | -      | -           | -      | -         | -          |       |

**Table 1 (Contd.) Crop-wise State-wise Weighted Average\* of Farm Harvest Prices of Principal Crops in India**

(Rs.per Quintal)

| Crop Name  | Variety  | Year    | Season \$ | Telangana | Tripura | Uttar Pradesh | Uttranchal | West Bengal |  |  |  |  |  |  |
|------------|----------|---------|-----------|-----------|---------|---------------|------------|-------------|--|--|--|--|--|--|
| Areca nut  | -        | 2015-16 | -         | -         | -       | -             | -          | -           |  |  |  |  |  |  |
|            |          |         | Kharif    | -         | -       | -             | -          | -           |  |  |  |  |  |  |
|            |          |         | Summer    | -         | -       | -             | -          | -           |  |  |  |  |  |  |
| Bajra      | -        | 2015-16 | -         | 1539      | -       | -             | -          | -           |  |  |  |  |  |  |
|            |          |         | Kharif    | 1863      | -       | 1417          | -          | -           |  |  |  |  |  |  |
|            |          |         | Rabi      | 1434      | -       | -             | -          | -           |  |  |  |  |  |  |
|            |          |         | Summer    | -         | -       | -             | -          | -           |  |  |  |  |  |  |
| Banana     | -        | 2015-16 | -         | -         | -       | -             | -          |             |  |  |  |  |  |  |
| Barley     | -        | 2015-16 | -         | -         | -       | -             | -          | -           |  |  |  |  |  |  |
|            |          |         | Rabi      | -         | -       | 1384          | 1561       | -           |  |  |  |  |  |  |
| Cashewnut  | -        | 2015-16 | -         | -         | -       | -             | -          | -           |  |  |  |  |  |  |
|            |          |         | Summer    | -         | -       | -             | -          | -           |  |  |  |  |  |  |
|            | Raw      | 2015-16 | -         | -         | -       | -             | -          | -           |  |  |  |  |  |  |
| CasterSeed | -        | 2015-16 | -         | 3286      | -       | -             | -          | -           |  |  |  |  |  |  |
|            |          |         | Kharif    | 3189      | -       | -             | -          | -           |  |  |  |  |  |  |
|            |          |         | Rabi      | -         | -       | -             | -          | -           |  |  |  |  |  |  |
| Chilly     | -        | 2015-16 | -         | -         | -       | -             | -          | -           |  |  |  |  |  |  |
|            |          |         | Kharif    | -         | -       | -             | -          | -           |  |  |  |  |  |  |
|            |          |         | Rabi      | -         | -       | -             | -          | -           |  |  |  |  |  |  |
|            | Dry      | 2015-16 | -         | 10343     | -       | -             | -          | -           |  |  |  |  |  |  |
|            |          |         | Kharif    | 9742      | -       | -             | -          | -           |  |  |  |  |  |  |
|            |          | Rabi    | 12360     | -         | -       | -             | -          | -           |  |  |  |  |  |  |
|            | Green    | 2015-16 | -         | -         | -       | -             | -          | -           |  |  |  |  |  |  |
| Coconut    | -        | 2015-16 | -         | -         | -       | -             | -          | -           |  |  |  |  |  |  |
|            |          |         | Kharif    | -         | -       | -             | -          | -           |  |  |  |  |  |  |
|            |          |         | Rabi      | -         | -       | -             | -          | -           |  |  |  |  |  |  |
|            |          |         | Summer    | -         | -       | -             | -          | -           |  |  |  |  |  |  |
| Cotton     | -        | 2015-16 | -         | 3932      | 4400    | -             | -          | -           |  |  |  |  |  |  |
|            |          |         | Kharif    | 3939      | -       | 5568          | -          | -           |  |  |  |  |  |  |
|            |          |         | Rabi      | 3861      | -       | -             | -          | -           |  |  |  |  |  |  |
|            |          |         | Summer    | -         | -       | -             | -          | -           |  |  |  |  |  |  |
|            | American | 2015-16 | -         | -         | -       | -             | -          | -           |  |  |  |  |  |  |
|            |          |         | Kharif    | -         | -       | -             | -          | -           |  |  |  |  |  |  |
|            | Desi     | 2015-16 | -         | -         | -       | -             | -          | -           |  |  |  |  |  |  |
|            |          |         | Kharif    | -         | -       | -             | -          | -           |  |  |  |  |  |  |
|            | Hybrid   | 2015-16 | -         | -         | -       | -             | -          | -           |  |  |  |  |  |  |

**Table 1 (Contd.) Crop-wise State-wise Weighted Average\* of Farm Harvest Prices of Principal Crops in India**

(Rs.per Quintal)

| Crop Name  | Variety | Year    | Season \$ | Andhra Pradesh | Andman & Nicobar | Assam | Bihar | Chandigarh | Chhattisgarh | Delhi | Goa  | Gujarat | Haryana | Himachal Pradesh | Jammu & Kashmir |   |
|------------|---------|---------|-----------|----------------|------------------|-------|-------|------------|--------------|-------|------|---------|---------|------------------|-----------------|---|
| Cotton     | Lint    | 2015-16 | Kharif    | -              | -                | -     | -     | -          | -            | -     | -    | -       | -       | -                | -               |   |
| Ginger     | -       | 2015-16 | -         | -              | 12000            | -     | -     | -          | -            | -     | -    | -       | -       | 6396             | -               |   |
|            |         |         | Kharif    | -              | -                | -     | -     | -          | -            | -     | -    | -       | -       | -                | -               | - |
|            |         |         | Rabi      | -              | -                | -     | 3208  | -          | -            | -     | -    | -       | -       | -                | -               | - |
|            | Dry     | 2015-16 | -         | -              | -                | -     | -     | -          | -            | -     | -    | -       | -       | -                | -               |   |
| Gram       | -       | 2015-16 | -         | 4610           | -                | 4445  | -     | -          | 5609         | 5000  | -    | 3451    | -       | 7226             | -               |   |
|            |         |         | Kharif    | -              | -                | -     | -     | -          | -            | -     | -    | -       | -       | -                | -               | - |
|            |         |         | Rabi      | 4610           | -                | -     | 3624  | -          | -            | -     | -    | -       | -       | -                | -               | - |
| Ground Nut | -       | 2015-16 | -         | 4691           | -                | -     | -     | -          | 5786         | -     | -    | -       | -       | 7665             | -               |   |
|            |         |         | Kharif    | 4950           | -                | -     | 6602  | -          | -            | -     | -    | 3681    | 3851    | -                | -               |   |
|            |         |         | Rabi      | 5107           | -                | -     | -     | -          | -            | -     | -    | -       | -       | -                | -               | - |
|            |         |         | Summer    | -              | -                | -     | -     | -          | -            | -     | -    | -       | -       | -                | -               | - |
| Jowar      | -       | 2015-16 | -         | 1582           | -                | -     | -     | -          | -            | 1750  | -    | 2031    | -       | -                | -               |   |
|            |         |         | Kharif    | 1623           | -                | -     | 869   | -          | 2299         | -     | -    | -       | 3107    | -                | -               |   |
|            |         |         | Rabi      | 1575           | -                | -     | -     | -          | 1888         | -     | -    | -       | -       | -                | -               | - |
|            |         |         | Summer    | -              | -                | -     | -     | -          | -            | -     | -    | -       | -       | -                | -               | - |
|            | HYV     | 2015-16 | Kharif    | -              | -                | -     | -     | -          | -            | -     | -    | -       | -       | -                | -               | - |
|            |         |         | Rabi      | -              | -                | -     | -     | -          | -            | -     | -    | -       | -       | -                | -               | - |
| Local      | 2015-16 | Kharif  | -         | -              | -                | -     | -     | -          | -            | -     | -    | -       | -       | -                | -               |   |
| Jute       | -       | 2015-16 | -         | -              | -                | 1890  | -     | -          | -            | -     | -    | -       | -       | -                | -               |   |
|            |         |         | Kharif    | -              | -                | -     | 3276  | -          | -            | -     | -    | -       | -       | -                | -               | - |
| Linseed    | -       | 2015-16 | -         | -              | -                | 2809  | -     | -          | 5440         | -     | -    | -       | -       | 6907             | 5555            |   |
|            |         |         | Rabi      | -              | -                | -     | 3060  | -          | -            | -     | -    | -       | -       | -                | -               | - |
| Maize      | -       | 2015-16 | -         | 1328           | 3200             | 1081  | -     | 1241       | 1702         | 1720  | -    | 1284    | -       | 1713             | 1264            |   |
|            |         |         | Kharif    | 1340           | -                | -     | 1079  | -          | -            | -     | -    | -       | -       | 1600             | -               | - |
|            |         |         | Rabi      | 1325           | -                | -     | 1135  | -          | -            | -     | -    | -       | -       | -                | -               | - |
|            | HB      | 2015-16 | Rabi      | -              | -                | -     | -     | -          | -            | -     | -    | -       | -       | -                | -               | - |
| Summer     |         |         | -         | -              | -                | -     | -     | -          | -            | -     | -    | -       | -       | -                | -               |   |
| Mesta      | -       | 2015-16 | -         | 3353           | -                | 1522  | -     | -          | -            | -     | -    | -       | -       | -                | -               |   |
|            |         |         | Kharif    | 3353           | -                | -     | 1895  | -          | -            | -     | -    | -       | -       | -                | -               | - |
| Nigerseed  | -       | 2015-16 | -         | -              | -                | 3597  | -     | -          | 5327         | -     | -    | -       | -       | -                | -               |   |
| Paddy      | -       | 2015-16 | -         | 1503           | 2200             | -     | -     | 1451       | -            | 1450  | 1020 | 1437    | -       | 2084             | 1713            |   |
|            |         |         | Autum     | -              | -                | 1035  | -     | -          | -            | -     | -    | -       | -       | -                | -               | - |
|            |         |         | Kharif    | 1515           | -                | -     | -     | -          | -            | -     | -    | -       | -       | 1753             | -               | - |
|            |         |         | Rabi      | 1488           | -                | -     | -     | -          | -            | -     | -    | -       | -       | -                | -               | - |



**Table 1 (Contd.) Crop-wise State-wise Weighted Average\* of Farm Harvest Prices of Principal Crops in India**

(Rs.per Quintal)

| Crop Name  | Variety | Year    | Season \$ | Jharkhand | Karnataka | Kerala | Maharashtra | Manipur | Mizoram | Nagaland | Orissa | Pondicherry | Punjab | Rajasthan | Tamil Nadu |      |   |
|------------|---------|---------|-----------|-----------|-----------|--------|-------------|---------|---------|----------|--------|-------------|--------|-----------|------------|------|---|
| Cotton     | Lint    | 2015-16 | Kharif    | -         | -         | -      | -           | -       | -       | -        | -      | -           | -      | 11026     | -          |      |   |
| Ginger     | -       | 2015-16 | -         | -         | -         | -      | -           | -       | 1558    | 3000     | -      | -           | -      | -         | -          |      |   |
|            |         |         | Kharif    | -         | 1048      | -      | -           | -       | -       | -        | -      | -           | -      | -         | 5062       | -    |   |
|            |         |         | Rabi      | 8759      | -         | -      | -           | 3500    | -       | -        | -      | -           | -      | -         | -          | -    |   |
|            | Dry     | 2015-16 | -         | -         | -         | 14452  | -           | -       | -       | -        | -      | -           | -      | -         | -          |      |   |
| Gram       | -       | 2015-16 | -         | -         | -         | -      | 4169        | -       | -       | -        | -      | -           | 2808   | -         | 5933       |      |   |
|            |         |         | Kharif    | -         | 2756      | -      | -           | -       | -       | -        | -      | -           | -      | -         | -          | -    |   |
|            |         |         | Rabi      | 5010      | 4530      | -      | -           | -       | -       | -        | -      | -           | -      | -         | 4318       | -    |   |
| Ground Nut | -       | 2015-16 | -         | -         | -         | -      | 3585        | -       | -       | -        | 3672   | 5339        | 4030   | -         | 5242       |      |   |
|            |         |         | Kharif    | -         | 4212      | -      | -           | -       | -       | -        | -      | -           | -      | -         | 3878       | -    |   |
|            |         |         | Rabi      | -         | 4121      | -      | -           | -       | -       | -        | -      | -           | -      | -         | -          | -    |   |
|            |         |         | Summer    | -         | 4494      | -      | -           | -       | -       | -        | -      | -           | -      | -         | -          | -    |   |
| Jowar      | -       | 2015-16 | -         | -         | -         | -      | 1763        | -       | -       | -        | -      | -           | -      | -         | -          |      |   |
|            |         |         | Kharif    | -         | -         | -      | -           | -       | -       | -        | -      | -           | -      | -         | 1807       | -    |   |
|            |         |         | Rabi      | -         | 1367      | -      | -           | -       | -       | -        | -      | -           | -      | -         | -          | -    |   |
|            |         |         | Summer    | -         | 1394      | -      | -           | -       | -       | -        | -      | -           | -      | -         | -          | -    |   |
|            | HYV     | 2015-16 | Kharif    | -         | 1662      | -      | -           | -       | -       | -        | -      | -           | -      | -         | -          | -    |   |
|            |         |         | Rabi      | -         | 1257      | -      | -           | -       | -       | -        | -      | -           | -      | -         | -          | -    |   |
| Local      | 2015-16 | Kharif  | -         | 1918      | -         | -      | -           | -       | -       | -        | -      | -           | -      | -         | -          |      |   |
| Jute       | -       | 2015-16 | -         | -         | -         | -      | -           | -       | -       | -        | 2920   | -           | -      | -         | -          |      |   |
|            |         |         | Kharif    | -         | -         | -      | -           | -       | -       | -        | -      | -           | -      | -         | -          | -    |   |
| Linseed    | -       | 2015-16 | -         | -         | -         | -      | 4290        | -       | -       | -        | -      | -           | -      | -         | -          |      |   |
|            |         |         | Rabi      | -         | 8500      | -      | -           | -       | -       | -        | -      | -           | -      | -         | 3803       | -    |   |
| Maize      | -       | 2015-16 | -         | -         | -         | -      | 1351        | -       | 1440    | 1200     | 1205   | -           | 1322   | -         | 1620       |      |   |
|            |         |         | Kharif    | -         | 1378      | -      | -           | -       | -       | -        | -      | -           | -      | -         | 1422       | -    |   |
|            |         |         | Rabi      | 1257      | -         | -      | -           | 1425    | -       | -        | -      | -           | -      | -         | -          | -    |   |
|            | HB      | 2015-16 | Rabi      | -         | 1391      | -      | -           | -       | -       | -        | -      | -           | -      | -         | -          | -    |   |
| Summer     |         |         | -         | 1460      | -         | -      | -           | -       | -       | -        | -      | -           | -      | -         | -          |      |   |
| Mesta      | -       | 2015-16 | -         | -         | -         | -      | -           | -       | -       | -        | -      | -           | -      | -         | -          |      |   |
|            |         |         | Kharif    | -         | -         | -      | -           | -       | -       | -        | -      | -           | -      | -         | -          | -    |   |
| Nigerseed  | -       | 2015-16 | -         | -         | -         | 5249   | -           | -       | -       | -        | -      | -           | -      | -         | -          |      |   |
| Paddy      | -       | 2015-16 | -         | -         | -         | 1835   | 1660        | -       | 1912    | -        | 1335   | -           | -      | -         | -          | 1333 |   |
|            |         |         | Autum     | -         | -         | -      | -           | -       | -       | -        | -      | -           | -      | -         | -          | -    |   |
|            |         |         | Kharif    | -         | -         | -      | -           | -       | -       | -        | -      | -           | -      | -         | -          | 1662 | - |
|            |         |         | Rabi      | -         | 1530      | -      | -           | -       | 1433    | -        | -      | -           | -      | -         | -          | -    | - |

**Table 1 (Contd.) Crop-wise State-wise Weighted Average\* of Farm Harvest Prices of Principal Crops in India**

(Rs.per Quintal)

| Crop Name  | Variety | Year    | Season \$ | Telangana | Tripura | Uttar Pradesh | Uttanchal | West Bengal |  |  |  |  |  |  |
|------------|---------|---------|-----------|-----------|---------|---------------|-----------|-------------|--|--|--|--|--|--|
| Cotton     | Lint    | 2015-16 | Kharif    | -         | -       | -             | -         | -           |  |  |  |  |  |  |
| Ginger     | -       | 2015-16 | -         | -         | -       | -             | -         | -           |  |  |  |  |  |  |
|            |         |         | Kharif    | -         | -       | -             | -         | -           |  |  |  |  |  |  |
|            |         |         | Rabi      | -         | -       | -             | -         | -           |  |  |  |  |  |  |
|            | Dry     | 2015-16 | -         | -         | -       | -             | -         |             |  |  |  |  |  |  |
| Gram       | -       | 2015-16 | -         | 4489      | 7615    | -             | -         | 5511        |  |  |  |  |  |  |
|            |         |         | Kharif    | -         | -       | -             | -         | -           |  |  |  |  |  |  |
|            |         |         | Rabi      | 4461      | -       | 5603          | -         | -           |  |  |  |  |  |  |
| Ground Nut | -       | 2015-16 | -         | 4544      | -       | -             | -         | -           |  |  |  |  |  |  |
|            |         |         | Kharif    | 5331      | -       | 6162          | 5375      | -           |  |  |  |  |  |  |
|            |         |         | Rabi      | 4937      | -       | -             | -         | -           |  |  |  |  |  |  |
|            |         |         | Summer    | -         | -       | -             | -         | -           |  |  |  |  |  |  |
| Jowar      | -       | 2015-16 | -         | 2092      | -       | -             | -         | -           |  |  |  |  |  |  |
|            |         |         | Kharif    | 2057      | -       | 1426          | -         | -           |  |  |  |  |  |  |
|            |         |         | Rabi      | 2394      | -       | -             | -         | -           |  |  |  |  |  |  |
|            |         |         | Summer    | -         | -       | -             | -         | -           |  |  |  |  |  |  |
|            | HYV     | 2015-16 | Kharif    | -         | -       | -             | -         | -           |  |  |  |  |  |  |
|            |         |         | Rabi      | -         | -       | -             | -         | -           |  |  |  |  |  |  |
| Local      | 2015-16 | Kharif  | -         | -         | -       | -             | -         |             |  |  |  |  |  |  |
| Jute       | -       | 2015-16 | -         | -         | 2985    | -             | -         | 4448        |  |  |  |  |  |  |
|            |         |         | Kharif    | -         | -       | -             | -         | -           |  |  |  |  |  |  |
| Linseed    | -       | 2015-16 | -         | -         | -       | -             | -         | -           |  |  |  |  |  |  |
|            |         |         | Rabi      | -         | -       | 4238          | -         | -           |  |  |  |  |  |  |
| Maize      | -       | 2015-16 | -         | 1367      | 2637    | -             | -         | -           |  |  |  |  |  |  |
|            |         |         | Kharif    | 1475      | -       | 1211          | 1495      | -           |  |  |  |  |  |  |
|            |         |         | Rabi      | 1324      | -       | -             | -         | -           |  |  |  |  |  |  |
|            | HB      | 2015-16 | Rabi      | -         | -       | -             | -         | -           |  |  |  |  |  |  |
| Summer     |         |         | -         | -         | -       | -             | -         |             |  |  |  |  |  |  |
| Mesta      | -       | 2015-16 | -         | -         | -       | -             | -         | -           |  |  |  |  |  |  |
|            |         |         | Kharif    | -         | -       | -             | -         | -           |  |  |  |  |  |  |
| Nigerseed  |         | 2015-16 | -         | -         | -       | -             | -         | -           |  |  |  |  |  |  |
| Paddy      | -       | 2015-16 | -         | 1439      | 1399    | -             | -         | 1526        |  |  |  |  |  |  |
|            |         |         | Autum     | -         | -       | -             | -         | -           |  |  |  |  |  |  |
|            |         |         | Kharif    | 1427      | -       | 1317          | 1390      | -           |  |  |  |  |  |  |
|            |         |         | Rabi      | 1450      | -       | -             | -         | -           |  |  |  |  |  |  |

**Table 1 (Contd.) Crop-wise State-wise Weighted Average\* of Farm Harvest Prices of Principal Crops in India**

(Rs.per Quintal)

| Crop Name    | Variety | Year    | Season \$ | Andhra Pradesh | Andman & Nicobar | Assam | Bihar | Chandigarh | Chhattisgarh | Delhi | Goa  | Gujarat | Haryana | Himachal Pradesh | Jammu & Kashmir |   |
|--------------|---------|---------|-----------|----------------|------------------|-------|-------|------------|--------------|-------|------|---------|---------|------------------|-----------------|---|
| Paddy        | -       | 2015-16 | Summer    | -              | -                | 1041  | -     | -          | -            | -     | -    | -       | -       | -                | -               |   |
|              |         |         | Winter    | -              | -                | 1099  | -     | -          | -            | -     | -    | -       | -       | -                | -               |   |
|              | Bhadea  | 2015-16 | Kharif    | -              | -                | -     | 1114  | -          | -            | -     | -    | -       | -       | -                | -               |   |
|              | Coarse  | 2015-16 | -         | -              | -                | -     | -     | -          | 1299         | -     | -    | -       | -       | -                | -               |   |
|              | Fine    | 2015-16 | -         | -              | -                | -     | -     | -          | 1619         | -     | -    | -       | -       | -                | -               |   |
|              | Local   | 2015-16 | Kharif    | -              | -                | -     | -     | -          | -            | -     | -    | -       | -       | -                | -               |   |
|              | Medium  | 2015-16 | -         | -              | -                | -     | -     | -          | 1392         | -     | -    | -       | -       | -                | -               |   |
| Pepper       | -       | 2015-16 | -         | -              | 80000            | -     | -     | -          | -            | -     | -    | -       | -       | -                | -               |   |
| Potato       | -       | 2015-16 | -         | -              | -                | 1410  | -     | 1050       | -            | 1800  | -    | 1075    | -       | -                | 1458            |   |
|              |         |         | Kharif    | -              | -                | -     | 787   | -          | -            | -     | -    | -       | -       | 2262             | -               |   |
|              |         |         | Rabi      | -              | -                | -     | 766   | -          | -            | -     | -    | -       | -       | -                | 1702            | - |
|              |         |         | Summer    | -              | -                | -     | -     | -          | -            | -     | -    | -       | -       | -                | -               | - |
|              | Hills   | 2015-16 | Summer    | -              | -                | -     | -     | -          | 1794         | -     | -    | -       | -       | -                | -               |   |
|              |         |         | Winter    | -              | -                | -     | -     | -          | 1547         | -     | -    | -       | -       | -                | -               |   |
| Ragi         | -       | 2015-16 | -         | 1591           | -                | -     | -     | -          | 1744         | -     | 3500 | 1400    | -       | -                | -               |   |
|              |         |         | Kharif    | 1609           | -                | -     | 1066  | -          | -            | -     | -    | -       | -       | -                | -               |   |
|              |         |         | Rabi      | 1428           | -                | -     | -     | -          | -            | -     | -    | -       | -       | -                | -               |   |
|              | HYV     | 2015-16 | Kharif    | -              | -                | -     | -     | -          | -            | -     | -    | -       | -       | -                | -               |   |
|              |         |         | Rabi      | -              | -                | -     | -     | -          | -            | -     | -    | -       | -       | -                | -               |   |
|              |         |         | Summer    | -              | -                | -     | -     | -          | -            | -     | -    | -       | -       | -                |                 |   |
| Rape/Mustard | -       | 2015-16 | -         | -              | 8000             | 2831  | -     | -          | 4976         | -     | -    | 3622    | -       | 5522             | 3757            |   |
|              |         |         | Rabi      | -              | -                | -     | 3395  | -          | -            | -     | -    | -       | -       | -                | -               |   |
| Rice         | -       | 2015-16 | -         | -              | -                | -     | -     | -          | -            | -     | -    | -       | -       | -                | -               |   |
|              |         |         | Kharif    | -              | -                | -     | -     | -          | -            | -     | -    | -       | -       | -                | -               |   |
|              | Coarse  | 2015-16 | -         | -              | -                | -     | -     | -          | 2265         | -     | -    | -       | -       | -                |                 |   |
|              | Fine    | 2015-16 | -         | -              | -                | -     | -     | -          | 4352         | -     | -    | -       | -       | -                |                 |   |
|              |         |         | Medium    | 2015-16        | -                | -     | -     | -          | 2774         | -     | -    | -       | -       | -                |                 |   |
| Sannhemp     | -       | 2015-16 | -         | -              | -                | -     | -     | -          | 4213         | -     | -    | -       | -       | -                | -               |   |
|              |         |         | Kharif    | -              | -                | -     | -     | -          | -            | -     | -    | -       | -       | -                | -               |   |
| Sesamum      | -       | 2015-16 | -         | 5487           | 5000             | 6164  | -     | -          | -            | -     | -    | 9202    | -       | 10809            | 6252            |   |
|              |         |         | Kharif    | 4864           | -                | -     | 4652  | -          | 10056        | -     | -    | -       | -       | -                | -               |   |
|              |         |         | Rabi      | 5843           | -                | -     | 5489  | -          | 11337        | -     | -    | -       | -       | -                | -               |   |
|              |         |         | Summer    | -              | -                | -     | -     | -          | -            | -     | -    | -       | -       | -                | -               |   |
| Soyabean     | -       | 2015-16 | -         | -              | -                | -     | -     | -          | 3598         | -     | -    | -       | -       | 5334             | -               |   |
|              |         |         | Kharif    | -              | -                | -     | -     | -          | -            | -     | -    | -       | -       | -                | -               |   |
| Sugar Raw    | -       | 2015-16 | -         | 2590           | -                | 3835  | -     | -          | 3903         | -     | -    | -       | -       | -                |                 |   |

**Table 1 (Contd.) Crop-wise State-wise Weighted Average\* of Farm Harvest Prices of Principal Crops in India**

(Rs.per Quintal)

| Crop Name    | Variety | Year    | Season \$ | Jharkhand | Karnataka | Kerala | Maharashtra | Manipur | Mizoram | Nagaland | Orissa | Pondicherry | Punjab | Rajasthan | Tamil Nadu |   |
|--------------|---------|---------|-----------|-----------|-----------|--------|-------------|---------|---------|----------|--------|-------------|--------|-----------|------------|---|
| Paddy        | -       | 2015-16 | Summer    | -         | 1743      | -      | -           | -       | -       | -        | -      | -           | -      | -         | -          |   |
|              |         |         | Winter    | -         | -         | -      | -           | -       | -       | -        | -      | -           | -      | -         | -          |   |
|              | Bhadea  | 2015-16 | Kharif    | -         | -         | -      | -           | -       | -       | -        | -      | -           | -      | -         | -          |   |
|              | Coarse  | 2015-16 | -         | -         | -         | -      | -           | -       | -       | -        | -      | -           | -      | -         | -          |   |
|              | Fine    | 2015-16 | -         | -         | -         | -      | -           | -       | -       | -        | -      | 2170        | -      | -         | -          |   |
|              | Local   | 2015-16 | Kharif    | -         | 1592      | -      | -           | -       | -       | -        | -      | -           | -      | -         | -          |   |
|              | Medium  | 2015-16 | -         | -         | -         | -      | -           | -       | -       | -        | -      | -           | -      | -         | -          |   |
| Pepper       | -       | 2015-16 | -         | -         | -         | -      | -           | -       | -       | -        | -      | -           | -      | -         | -          |   |
| Potato       | -       | 2015-16 | -         | -         | -         | -      | -           | -       | 1902    | -        | 871    | -           | -      | -         | 1828       |   |
|              |         |         | Kharif    | -         | 952       | -      | -           | -       | -       | -        | -      | -           | -      | -         | -          |   |
|              |         |         | Rabi      | 1211      | 1714      | -      | -           | 1211    | -       | -        | -      | -           | -      | -         | 939        | - |
|              |         |         | Summer    | -         | 1151      | -      | -           | -       | -       | -        | -      | -           | -      | -         | -          | - |
|              | Hills   | 2015-16 | Summer    | -         | -         | -      | -           | -       | -       | -        | -      | -           | -      | -         | -          |   |
|              |         |         | Winter    | -         | -         | -      | -           | -       | -       | -        | -      | -           | -      | -         | -          |   |
| Ragi         | -       | 2015-16 | -         | -         | -         | -      | 1837        | -       | -       | -        | 1511   | 1642        | -      | -         | 2056       |   |
|              |         |         | Kharif    | -         | -         | -      | -           | -       | -       | -        | -      | -           | -      | -         | -          |   |
|              |         |         | Rabi      | -         | -         | -      | -           | -       | -       | -        | -      | -           | -      | -         | -          |   |
|              | HYV     | 2015-16 | Kharif    | -         | 1606      | -      | -           | -       | -       | -        | -      | -           | -      | -         | -          |   |
|              |         |         | Rabi      | -         | 1607      | -      | -           | -       | -       | -        | -      | -           | -      | -         | -          |   |
| Summer       | -       | 1639    | -         | -         | -         | -      | -           | -       | -       | -        | -      | -           | -      |           |            |   |
| Rape/Mustard | -       | 2015-16 | -         | -         | -         | -      | 3656        | -       | 3534    | -        | 4195   | -           | -      | -         | -          |   |
|              |         |         | Rabi      | 4326      | -         | -      | -           | 3000    | -       | -        | -      | -           | -      | -         | 3826       |   |
| Rice         | -       | 2015-16 | -         | -         | -         | -      | -           | -       | 2433    | -        | -      | -           | -      | -         | -          |   |
|              |         |         | Kharif    | -         | -         | -      | -           | -       | -       | -        | -      | -           | -      | -         | 2274       |   |
|              | Coarse  | 2015-16 | -         | -         | -         | -      | -           | -       | -       | -        | -      | -           | -      | -         |            |   |
|              | Fine    | 2015-16 | -         | -         | -         | -      | -           | -       | -       | -        | -      | -           | -      | -         |            |   |
|              | Medium  | 2015-16 | -         | -         | -         | -      | -           | -       | -       | -        | -      | -           | -      | -         |            |   |
| Sannhemp     | -       | 2015-16 | -         | -         | -         | -      | -           | -       | -       | -        | -      | -           | -      | -         | -          |   |
|              |         |         | Kharif    | -         | -         | -      | -           | -       | -       | -        | -      | -           | -      | -         | 2429       |   |
| Sesamum      | -       | 2015-16 | -         | -         | -         | -      | 6625        | -       | 5525    | -        | 4684   | 3868        | 9000   | -         | 7491       |   |
|              |         |         | Kharif    | -         | 5760      | -      | -           | -       | -       | -        | -      | -           | -      | -         | 7046       |   |
|              |         |         | Rabi      | -         | 4550      | -      | -           | -       | -       | -        | -      | -           | -      | -         | -          |   |
|              |         |         | Summer    | -         | 2300      | -      | -           | -       | -       | -        | -      | -           | -      | -         | -          |   |
| Soyabean     | -       | 2015-16 | -         | -         | -         | -      | 3490        | -       | 6474    | -        | -      | -           | -      | -         |            |   |
|              |         |         | Kharif    | -         | -         | -      | -           | -       | -       | -        | -      | -           | -      | -         |            |   |
| Sugar Raw    | -       | 2015-16 | -         | -         | -         | -      | -           | -       | -       | -        | -      | -           | -      | -         |            |   |

**Table 1 (Contd.) Crop-wise State-wise Weighted Average\* of Farm Harvest Prices of Principal Crops in India**

(Rs.per Quintal)

| Crop Name    | Variety | Year    | Season \$ | Telangana | Tripura | Uttar Pradesh | Uttranchal | West Bengal |  |  |  |  |  |  |  |
|--------------|---------|---------|-----------|-----------|---------|---------------|------------|-------------|--|--|--|--|--|--|--|
| Paddy        | -       | 2015-16 | Summer    | -         | -       | -             | -          | -           |  |  |  |  |  |  |  |
|              |         |         | Winter    | -         | -       | -             | -          | -           |  |  |  |  |  |  |  |
|              | Bhadea  | 2015-16 | Kharif    | -         | -       | -             | -          | -           |  |  |  |  |  |  |  |
|              | Coarse  | 2015-16 | -         | -         | -       | -             | -          | -           |  |  |  |  |  |  |  |
|              | Fine    | 2015-16 | -         | -         | -       | -             | -          | -           |  |  |  |  |  |  |  |
|              | Local   | 2015-16 | Kharif    | -         | -       | -             | -          | -           |  |  |  |  |  |  |  |
|              | Medium  | 2015-16 | -         | -         | -       | -             | -          | -           |  |  |  |  |  |  |  |
| Pepper       | -       | 2015-16 | -         | -         | -       | -             | -          | -           |  |  |  |  |  |  |  |
| Potato       | -       | 2015-16 | -         | -         | 968     | -             | -          | 1296        |  |  |  |  |  |  |  |
|              |         |         | Kharif    | -         | -       | -             | -          | -           |  |  |  |  |  |  |  |
|              |         |         | Rabi      | -         | -       | 688           | -          | -           |  |  |  |  |  |  |  |
|              |         |         | Summer    | -         | -       | -             | -          | -           |  |  |  |  |  |  |  |
|              | Hills   | 2015-16 | Summer    | -         | -       | -             | -          | -           |  |  |  |  |  |  |  |
|              |         |         | Winter    | -         | -       | -             | -          | -           |  |  |  |  |  |  |  |
| Ragi         | -       | 2015-16 | -         | 1644      | -       | -             | -          | -           |  |  |  |  |  |  |  |
|              |         |         | Kharif    | 1614      | -       | -             | 2964       | -           |  |  |  |  |  |  |  |
|              |         |         | Rabi      | 1678      | -       | -             | -          | -           |  |  |  |  |  |  |  |
|              | HYV     | 2015-16 | Kharif    | -         | -       | -             | -          | -           |  |  |  |  |  |  |  |
|              |         |         | Rabi      | -         | -       | -             | -          | -           |  |  |  |  |  |  |  |
|              |         |         | Summer    | -         | -       | -             | -          | -           |  |  |  |  |  |  |  |
| Rape/Mustard | -       | 2015-16 | -         | -         | 6589    | -             | -          | 4147        |  |  |  |  |  |  |  |
|              |         |         | Rabi      | -         | -       | 3623          | 3495       | -           |  |  |  |  |  |  |  |
| Rice         | -       | 2015-16 | -         | -         | -       | -             | -          | -           |  |  |  |  |  |  |  |
|              |         |         | Kharif    | -         | -       | -             | -          | -           |  |  |  |  |  |  |  |
|              | Coarse  | 2015-16 | -         | -         | -       | -             | -          | -           |  |  |  |  |  |  |  |
|              | Fine    | 2015-16 | -         | -         | -       | -             | -          | -           |  |  |  |  |  |  |  |
|              | Medium  | 2015-16 | -         | -         | -       | -             | -          | -           |  |  |  |  |  |  |  |
| Sannhemp     | -       | 2015-16 | -         | -         | -       | -             | -          | -           |  |  |  |  |  |  |  |
|              |         |         | Kharif    | -         | -       | -             | -          | -           |  |  |  |  |  |  |  |
| Sesamum      | -       | 2015-16 | -         | 6711      | 6738    | -             | -          | -           |  |  |  |  |  |  |  |
|              |         |         | Kharif    | 7241      | -       | 6365          | 7381       | -           |  |  |  |  |  |  |  |
|              |         |         | Rabi      | 6695      | -       | -             | -          | -           |  |  |  |  |  |  |  |
|              |         |         | Summer    | -         | -       | -             | -          | -           |  |  |  |  |  |  |  |
| Soyabean     | -       | 2015-16 | -         | -         | -       | -             | -          | -           |  |  |  |  |  |  |  |
|              |         |         | Kharif    | -         | -       | 2640          | 3379       | -           |  |  |  |  |  |  |  |
| Sugar Raw    | -       | 2015-16 | -         | 3164      | -       | -             | -          | -           |  |  |  |  |  |  |  |

**Table 1 (Contd.) Crop-wise State-wise Weighted Average\* of Farm Harvest Prices of Principal Crops in India**

(Rs.per Quintal)

| Crop Name | Variety | Year    | Season \$ | Andhra Pradesh | Andman & Nicobar | Assam | Bihar | Chandigarh | Chhattisgarh | Delhi | Goa | Gujarat | Haryana | Himachal Pradesh | Jammu & Kashmir |   |
|-----------|---------|---------|-----------|----------------|------------------|-------|-------|------------|--------------|-------|-----|---------|---------|------------------|-----------------|---|
| Sugar Raw | -       | 2015-16 | Kharif    | 2590           | -                | -     | -     | -          | -            | -     | -   | -       | -       | -                | -               |   |
|           |         |         | Rabi      | -              | -                | -     | -     | -          | -            | -     | -   | -       | -       | -                | -               | - |
| Sugarcane | -       | 2015-16 | -         | -              | 2313             | 1044  | -     | -          | -            | -     | 250 | -       | -       | -                | 1450            |   |
|           |         |         | Kharif    | -              | -                | -     | -     | -          | -            | -     | -   | -       | -       | -                | -               | - |
|           |         |         | Rabi      | -              | -                | -     | -     | -          | -            | -     | -   | -       | -       | -                | -               | - |
|           |         |         | Summer    | -              | -                | -     | -     | -          | -            | -     | -   | -       | -       | -                | -               | - |
| Sunflower | -       | 2015-16 | -         | 3439           | -                | -     | -     | -          | -            | -     | -   | -       | -       | -                | -               |   |
|           |         |         | Kharif    | 3572           | -                | -     | -     | -          | -            | -     | -   | -       | -       | -                | -               |   |
|           |         |         | Rabi      | 3406           | -                | -     | -     | -          | -            | -     | -   | -       | -       | -                | -               |   |
|           |         |         | Summer    | -              | -                | -     | -     | -          | -            | -     | -   | -       | -       | -                | -               |   |
| Tapioca   | -       | 2015-16 | -         | -              | 2389             | -     | -     | -          | -            | -     | -   | -       | -       | -                |                 |   |
| Tobacco   | -       | 2015-16 | -         | 12811          | -                | 8510  | -     | -          | 11169        | -     | -   | 4611    | -       | -                | -               |   |
|           |         |         | Kharif    | -              | -                | -     | -     | -          | -            | -     | -   | -       | -       | -                |                 |   |
|           |         |         | Rabi      | 12811          | -                | -     | -     | -          | -            | -     | -   | -       | -       | -                |                 |   |
|           |         |         | Summer    | -              | -                | -     | -     | -          | -            | -     | -   | -       | -       | -                |                 |   |
| Tur Arhar | -       | 2015-16 | -         | 8073           | 9000             | 6725  | -     | -          | -            | -     | -   | 4841    | -       | -                |                 |   |
|           |         |         | Kharif    | 8073           | -                | -     | -     | -          | -            | -     | -   | -       | -       | -                |                 |   |
|           |         |         | Rabi      | -              | -                | -     | 3625  | -          | -            | -     | -   | -       | -       |                  |                 |   |
|           | Delay   | 2015-16 | -         | -              | -                | -     | -     | 8436       | -            | -     | -   | -       | -       |                  |                 |   |
|           | Early   | 2015-16 | -         | -              | -                | -     | -     | 7990       | -            | -     | -   | -       | -       |                  |                 |   |
| Turmeric  | -       | 2015-16 | -         | 7717           | 11000            | -     | -     | -          | 9611         | -     | -   | -       | -       | 10404            | -               |   |
|           |         |         | Kharif    | 7717           | -                | -     | -     | -          | -            | -     | -   | -       | -       | -                |                 |   |
|           |         |         | Rabi      | -              | -                | -     | 8019  | -          | -            | -     | -   | -       | -       |                  |                 |   |
|           |         |         | Summer    | -              | -                | -     | -     | -          | -            | -     | -   | -       | -       |                  |                 |   |
| Dry       | 2015-16 | -       | -         | -              | 10996            | -     | -     | -          | -            | -     | -   | -       |         |                  |                 |   |
| Wheat     | -       | 2015-16 | -         | -              | -                | 1081  | -     | 1580       | 2102         | 1525  | -   | 1608    | -       | 1885             | 1505            |   |
|           |         |         | Rabi      | -              | -                | -     | 1284  | -          | -            | -     | -   | -       | -       |                  |                 |   |
|           |         |         | Summer    | -              | -                | -     | -     | -          | -            | -     | -   | -       |         |                  |                 |   |



**Table 1 (Contd.) Crop-wise State-wise Weighted Average\* of Farm Harvest Prices of Principal Crops in India**

(Rs.per Quintal)

| Crop Name | Variety | Year    | Season \$ | Jharkhand | Karnataka | Kerala | Maharashtra | Manipur | Mizoram | Nagaland | Orissa | Pondicherry | Punjab | Rajasthan | Tamil Nadu |   |
|-----------|---------|---------|-----------|-----------|-----------|--------|-------------|---------|---------|----------|--------|-------------|--------|-----------|------------|---|
| Sugar Raw | -       | 2015-16 | Kharif    | -         | -         | -      | -           | -       | -       | -        | -      | -           | -      | -         | -          |   |
|           |         |         | Rabi      | -         | -         | -      | -           | -       | -       | -        | -      | -           | -      | -         | 3323       | - |
| Sugarcane | -       | 2015-16 | -         | -         | -         | -      | -           | -       | 921     | -        | 240    | -           | 300    | -         | -          |   |
|           |         |         | Kharif    | -         | 2600      | -      | -           | -       | -       | -        | -      | -           | -      | -         | -          | - |
|           |         |         | Rabi      | -         | -         | -      | -           | 840     | -       | -        | -      | -           | -      | -         | -          | - |
|           |         |         | Summer    | -         | 1728      | -      | -           | -       | -       | -        | -      | -           | -      | -         | -          | - |
| Sunflower | -       | 2015-16 | -         | -         | -         | -      | 3446        | -       | -       | -        | -      | -           | -      | -         | -          |   |
|           |         |         | Kharif    | -         | 3401      | -      | -           | -       | -       | -        | -      | -           | -      | -         | -          | - |
|           |         |         | Rabi      | -         | 3302      | -      | -           | -       | -       | -        | -      | -           | -      | -         | -          | - |
|           |         |         | Summer    | -         | 3501      | -      | -           | -       | -       | -        | -      | -           | -      | -         | -          | - |
| Tapioca   | -       | 2015-16 | -         | -         | -         | 1172   | -           | -       | -       | -        | -      | -           | -      | -         | 1561       |   |
| Tobacco   | -       | 2015-16 | -         | -         | -         | -      | -           | -       | 20922   | -        | -      | -           | -      | -         | -          |   |
|           |         |         | Kharif    | -         | -         | -      | -           | -       | -       | -        | -      | -           | -      | -         | -          |   |
|           |         |         | Rabi      | -         | -         | -      | -           | -       | -       | -        | -      | -           | -      | -         | -          |   |
|           |         |         | Summer    | -         | 10172     | -      | -           | -       | -       | -        | -      | -           | -      | -         | -          |   |
| Tur Arhar | -       | 2015-16 | -         | -         | -         | -      | 7741        | -       | 3609    | -        | -      | -           | -      | -         | -          |   |
|           |         |         | Kharif    | -         | 6134      | -      | -           | -       | -       | -        | -      | -           | -      | -         | -          |   |
|           |         |         | Rabi      | 6816      | -         | -      | -           | -       | -       | -        | -      | -           | -      | 6425      | -          |   |
|           | Delay   | 2015-16 | -         | -         | -         | -      | -           | -       | -       | -        | -      | -           | -      | -         | -          |   |
| Early     | 2015-16 | -       | -         | -         | -         | -      | -           | -       | -       | -        | -      | -           | -      | -         |            |   |
| Turmeric  | -       | 2015-16 | -         | -         | -         | -      | -           | -       | 1163    | -        | -      | -           | -      | -         | 10074      |   |
|           |         |         | Kharif    | -         | 8056      | -      | -           | -       | -       | -        | -      | -           | -      | -         | -          |   |
|           |         |         | Rabi      | 1000      | -         | -      | -           | -       | -       | -        | -      | -           | -      | -         | -          |   |
|           | Summer  | -       | 8056      | -         | -         | -      | -           | -       | -       | -        | -      | -           | -      |           |            |   |
| Dry       | 2015-16 | -       | -         | -         | -         | -      | -           | -       | -       | -        | -      | -           | -      |           |            |   |
| Wheat     | -       | 2015-16 | -         | -         | -         | -      | 1706        | -       | -       | -        | 1651   | -           | 1667   | -         | -          |   |
|           |         |         | Rabi      | 1631      | 1930      | -      | -           | -       | -       | -        | -      | -           | -      | 1596      | -          |   |
|           |         |         | Summer    | -         | 1493      | -      | -           | -       | -       | -        | -      | -           | -      | -         | -          |   |

**Table 1 (Contd.) Crop-wise State-wise Weighted Average\* of Farm Harvest Prices of Principal Crops in India**

(Rs.per Quintal)

| Crop Name | Variety | Year    | Season \$ | Telangana | Tripura | Uttar Pradesh | Uttranchal | West Bengal |  |  |  |  |  |  |
|-----------|---------|---------|-----------|-----------|---------|---------------|------------|-------------|--|--|--|--|--|--|
| Sugar Raw | -       | 2015-16 | Kharif    | 3036      | -       | 2955          | 3522       | -           |  |  |  |  |  |  |
|           |         |         | Rabi      | -         | -       | -             | -          | -           |  |  |  |  |  |  |
| Sugarcane | -       | 2015-16 | -         | -         | -       | -             | -          | -           |  |  |  |  |  |  |
|           |         |         | Kharif    | -         | -       | 248           | 286        | -           |  |  |  |  |  |  |
|           |         |         | Rabi      | -         | -       | -             | -          | -           |  |  |  |  |  |  |
|           |         |         | Summer    | -         | -       | -             | -          | -           |  |  |  |  |  |  |
| Sunflower | -       | 2015-16 | -         | -         | -       | -             | -          | -           |  |  |  |  |  |  |
|           |         |         | Kharif    | -         | -       | -             | -          | -           |  |  |  |  |  |  |
|           |         |         | Rabi      | -         | -       | -             | -          | -           |  |  |  |  |  |  |
|           |         |         | Summer    | -         | -       | -             | -          | -           |  |  |  |  |  |  |
| Tapioca   | -       | 2015-16 | -         | -         | -       | -             | -          |             |  |  |  |  |  |  |
| Tobacco   | -       | 2015-16 | -         | 14275     | -       | -             | -          | -           |  |  |  |  |  |  |
|           |         |         | Kharif    | 14275     | -       | -             | -          | -           |  |  |  |  |  |  |
|           |         |         | Rabi      | 14275     | -       | 3732          | -          | -           |  |  |  |  |  |  |
|           |         |         | Summer    | -         | -       | -             | -          | -           |  |  |  |  |  |  |
| Tur Arhar | -       | 2015-16 | -         | 8609      | -       | -             | -          | -           |  |  |  |  |  |  |
|           |         |         | Kharif    | 8615      | -       | -             | -          | -           |  |  |  |  |  |  |
|           |         |         | Rabi      | 7565      | -       | -             | -          | -           |  |  |  |  |  |  |
|           | Delay   | 2015-16 | -         | -         | -       | -             | -          | -           |  |  |  |  |  |  |
|           | Early   | 2015-16 | -         | -         | -       | -             | -          | -           |  |  |  |  |  |  |
| Turmeric  | -       | 2015-16 | -         | 7914      | -       | -             | -          | -           |  |  |  |  |  |  |
|           |         |         | Kharif    | 7937      | -       | -             | -          | -           |  |  |  |  |  |  |
|           |         |         | Rabi      | -         | -       | 3354          | -          | -           |  |  |  |  |  |  |
|           |         |         | Summer    | -         | -       | -             | -          | -           |  |  |  |  |  |  |
|           | Dry     | 2015-16 | -         | -         | -       | -             | -          | -           |  |  |  |  |  |  |
| Wheat     | -       | 2015-16 | -         | -         | -       | -             | -          | 1690        |  |  |  |  |  |  |
|           |         |         | Rabi      | -         | -       | 1438          | 1629       | -           |  |  |  |  |  |  |
|           |         |         | Summer    | -         | -       | -             | -          | -           |  |  |  |  |  |  |

\* State Weighted Average Provided by State Authority. \$ The icon (-) is given wherever state has not mentioned specific season.

**Table 2.1 Crop-wise District-wise Farm Harvest Prices of Principal Crops in India - Andhra Pradesh**

(Rs.per Quintal)

| Crop Name  | Variety | Year    | Season \$ | Anantapur | Chittor | East Godavari | Guntur | Kadapa | Krishna | Kurnool | Nellore | Prakasam | Srikakulam | Visakhapatnam | State Wtd Average |      |
|------------|---------|---------|-----------|-----------|---------|---------------|--------|--------|---------|---------|---------|----------|------------|---------------|-------------------|------|
| Bajra      | -       | 2015-16 | -         | 1724      | 1352    | -             | 1317   | 1365   | -       | 1376    | -       | 1283     | -          | 2178          | 1384              |      |
|            |         |         | Kharif    | 1724      | 1352    | -             | 1317   | 1402   | -       | 1376    | -       | 1283     | -          | 2178          | 1387              |      |
|            |         |         | Rabi      | -         | -       | -             | -      | 1327   | -       | -       | -       | -        | -          | -             | -                 | 1327 |
| CasterSeed | -       | 2015-16 | -         | 2383      | -       | -             | 2752   | 3487   | -       | 3500    | -       | 2693     | -          | -             | 3011              |      |
|            |         |         | Kharif    | 2383      | -       | -             | 2752   | 3487   | -       | 3500    | -       | 2693     | -          | -             | 3011              |      |
| Chilly     | Dry     | 2015-16 | -         | 13587     | 13123   | -             | 11225  | -      | 11305   | 10947   | 11313   | 11413    | 10217      | -             | 11321             |      |
|            |         |         | Kharif    | 13587     | -       | -             | 11186  | -      | 11280   | 10947   | -       | 11098    | -          | -             | 11204             |      |
|            |         |         | Rabi      | -         | 13123   | -             | 12258  | -      | 11875   | -       | 11313   | 12418    | 10217      | -             | 12045             |      |
| Cotton     | -       | 2015-16 | -         | 4346      | -       | 3787          | 4049   | 4145   | 3904    | 4064    | 3449    | 4098     | 3810       | 3649          | 4035              |      |
|            |         |         | Kharif    | 4346      | -       | 3787          | 4049   | 4145   | 3904    | 4064    | 3449    | 4098     | 3810       | 3649          | 4034              |      |
| Gram       | -       | 2015-16 | -         | 4534      | -       | -             | 4762   | 4580   | 4198    | 4503    | 4514    | 4724     | -          | -             | 4610              |      |
|            |         |         | Rabi      | -         | -       | -             | 4762   | 4580   | 4198    | 4534    | 4514    | 4724     | -          | -             | 4610              |      |
| Ground Nut | -       | 2015-16 | -         | 4740      | 4158    | -             | 5342   | 4816   | 5094    | 4849    | 5674    | 5219     | 4815       | 3342          | 4691              |      |
|            |         |         | Kharif    | 4676      | 3934    | -             | -      | 4534   | 4852    | 4805    | 5551    | 5260     | 4758       | 3342          | 4950              |      |
|            |         |         | Rabi      | 5364      | 5038    | -             | 5342   | 5036   | 5410    | 4956    | 5776    | 5178     | 4860       | -             | 5107              |      |
| Jowar      | -       | 2015-16 | -         | 1801      | -       | -             | 1325   | 1773   | -       | 1689    | 1316    | 1390     | -          | -             | 1582              |      |
|            |         |         | Kharif    | 1793      | -       | -             | -      | 1411   | -       | 1617    | -       | -        | -          | -             | 1623              |      |
|            |         |         | Rabi      | 1855      | -       | -             | 1325   | 1865   | -       | 1702    | 1316    | 1390     | -          | -             | 1575              |      |
| Maize      | -       | 2015-16 | -         | 1281      | 1293    | 1317          | 1367   | 1443   | 1369    | 1343    | 1375    | 1364     | 1274       | 1259          | 1328              |      |
|            |         |         | Kharif    | 1284      | 1293    | -             | 1393   | -      | 1328    | 1352    | -       | 1818     | 1291       | 1260          | 1340              |      |
|            |         |         | Rabi      | 1273      | -       | 1317          | 1367   | 1443   | 1375    | 1341    | 1375    | 1344     | 1252       | 1257          | 1325              |      |
| Mesta      | -       | 2015-16 | -         | -         | -       | -             | -      | -      | -       | -       | -       | -        | 3396       | -             | 3353              |      |
|            |         |         | Kharif    | -         | -       | -             | -      | -      | -       | -       | -       | -        | -          | 3396          | -                 | 3353 |
| Paddy      | -       | 2015-16 | -         | 1878      | 1389    | 1376          | 1812   | 1917   | 1601    | 1890    | 1577    | 1580     | 1390       | 1380          | 1503              |      |
|            |         |         | Kharif    | 2143      | 1271    | 1364          | 1817   | 1976   | 1608    | 1928    | 1330    | 1849     | 1392       | 1381          | 1515              |      |
|            |         |         | Rabi      | 1438      | 1402    | 1387          | 1562   | 1877   | 1472    | 1675    | 1600    | 1462     | 1289       | 1350          | 1488              |      |
| Ragi       | -       | 2015-16 | -         | 2003      | 1843    | -             | -      | -      | -       | -       | -       | 1428     | -          | 1465          | 1591              |      |
|            |         |         | Kharif    | 2003      | 1843    | -             | -      | -      | -       | -       | -       | -        | -          | -             | 1465              | 1609 |
|            |         |         | Rabi      | -         | -       | -             | -      | -      | -       | -       | -       | -        | 1428       | -             | -                 | 1428 |
| Sesamum    | -       | 2015-16 | -         | -         | -       | 5906          | 5592   | 5778   | -       | 6067    | 5838    | 5534     | 5221       | 5958          | 5487              |      |
|            |         |         | Kharif    | -         | -       | -             | 5470   | -      | -       | -       | -       | 5596     | 5221       | 5230          | 4864              |      |
|            |         |         | Rabi      | -         | -       | 5906          | 6010   | 5778   | -       | 6067    | 5838    | 5483     | -          | 6364          | 5843              |      |
| Sugar Raw  | -       | 2015-16 | -         | -         | 2331    | 3183          | -      | -      | -       | -       | -       | -        | 3352       | 2167          | 2590              |      |
|            |         |         | Kharif    | -         | 2331    | 3183          | -      | -      | -       | -       | -       | -        | -          | 3352          | 2167              | 2590 |
| Sunflower  | -       | 2015-16 | -         | 3606      | 3492    | -             | -      | 3604   | -       | 3543    | 3222    | 2848     | -          | -             | 3439              |      |
|            |         |         | Kharif    | 3600      | -       | -             | -      | 3820   | -       | 3505    | -       | -        | -          | -             | 3572              |      |

**Table 2.1 (Contd.) Crop-wise District-wise Farm Harvest Prices of Principal Crops in India - Andhra Pradesh**

(Rs.per Quintal)

| Crop Name  | Variety | Year    | Season \$ | Vizianagara<br>m | West<br>Godavari | State Wtd<br>Average |  |  |  |  |  |  |  |  |  |
|------------|---------|---------|-----------|------------------|------------------|----------------------|--|--|--|--|--|--|--|--|--|
| Bajra      | -       | 2015-16 | -         | -                | -                | 1384                 |  |  |  |  |  |  |  |  |  |
|            |         |         | Kharif    | -                | -                | 1387                 |  |  |  |  |  |  |  |  |  |
|            |         |         | Rabi      | -                | -                | 1327                 |  |  |  |  |  |  |  |  |  |
| CasterSeed | -       | 2015-16 | -         | -                | -                | 3011                 |  |  |  |  |  |  |  |  |  |
|            |         |         | Kharif    | -                | -                | 3011                 |  |  |  |  |  |  |  |  |  |
| Chilly     | Dry     | 2015-16 | -         | -                | 11730            | 11321                |  |  |  |  |  |  |  |  |  |
|            |         |         | Kharif    | -                | -                | 11204                |  |  |  |  |  |  |  |  |  |
|            |         |         | Rabi      | -                | 11730            | 12045                |  |  |  |  |  |  |  |  |  |
| Cotton     | -       | 2015-16 | -         | 3604             | 4010             | 4035                 |  |  |  |  |  |  |  |  |  |
|            |         |         | Kharif    | 3604             | 4010             | 4034                 |  |  |  |  |  |  |  |  |  |
| Gram       | -       | 2015-16 | -         | -                | -                | 4610                 |  |  |  |  |  |  |  |  |  |
|            |         |         | Rabi      | -                | -                | 4610                 |  |  |  |  |  |  |  |  |  |
| Ground Nut | -       | 2015-16 | -         | 4462             | 4209             | 4691                 |  |  |  |  |  |  |  |  |  |
|            |         |         | Kharif    | 4836             | -                | 4950                 |  |  |  |  |  |  |  |  |  |
|            |         |         | Rabi      | 4072             | 4209             | 5107                 |  |  |  |  |  |  |  |  |  |
| Jowar      | -       | 2015-16 | -         | -                | -                | 1582                 |  |  |  |  |  |  |  |  |  |
|            |         |         | Kharif    | -                | -                | 1623                 |  |  |  |  |  |  |  |  |  |
|            |         |         | Rabi      | -                | -                | 1575                 |  |  |  |  |  |  |  |  |  |
| Maize      | -       | 2015-16 | -         | 1410             | 1261             | 1328                 |  |  |  |  |  |  |  |  |  |
|            |         |         | Kharif    | 1422             | 1247             | 1340                 |  |  |  |  |  |  |  |  |  |
|            |         |         | Rabi      | 1404             | 1262             | 1325                 |  |  |  |  |  |  |  |  |  |
| Mesta      | -       | 2015-16 | -         | 3323             | -                | 3353                 |  |  |  |  |  |  |  |  |  |
|            |         |         | Kharif    | 3323             | -                | 3353                 |  |  |  |  |  |  |  |  |  |
| Paddy      | -       | 2015-16 | -         | 1408             | 1412             | 1503                 |  |  |  |  |  |  |  |  |  |
|            |         |         | Kharif    | 1409             | 1400             | 1515                 |  |  |  |  |  |  |  |  |  |
|            |         |         | Rabi      | 1363             | 1423             | 1488                 |  |  |  |  |  |  |  |  |  |
| Ragi       | -       | 2015-16 | -         | 1478             | -                | 1591                 |  |  |  |  |  |  |  |  |  |
|            |         |         | Kharif    | 1478             | -                | 1609                 |  |  |  |  |  |  |  |  |  |
|            |         |         | Rabi      | -                | -                | 1428                 |  |  |  |  |  |  |  |  |  |
| Sesamum    | -       | 2015-16 | -         | 4959             | -                | 5487                 |  |  |  |  |  |  |  |  |  |
|            |         |         | Kharif    | 4293             | -                | 4864                 |  |  |  |  |  |  |  |  |  |
|            |         |         | Rabi      | 5861             | -                | 5843                 |  |  |  |  |  |  |  |  |  |
| Sugar Raw  | -       | 2015-16 | -         | 2501             | 2872             | 2590                 |  |  |  |  |  |  |  |  |  |
|            |         |         | Kharif    | 2501             | 2872             | 2590                 |  |  |  |  |  |  |  |  |  |
| Sunflower  | -       | 2015-16 | -         | -                | -                | 3439                 |  |  |  |  |  |  |  |  |  |
|            |         |         | Kharif    | -                | -                | 3572                 |  |  |  |  |  |  |  |  |  |

**Table 2.1 (Contd.) Crop-wise District-wise Farm Harvest Prices of Principal Crops in India - Andhra Pradesh**

(Rs.per Quintal)

| Crop Name | Variety | Year    | Season \$ | Anantapur | Chittor | East Godavari | Guntur | Kadapa | Krishna | Kurnool | Nellore | Prakasam | Srikakulam | Visakhapatnam | State Wtd Average |
|-----------|---------|---------|-----------|-----------|---------|---------------|--------|--------|---------|---------|---------|----------|------------|---------------|-------------------|
| Sunflower | -       | 2015-16 | Rabi      | 3616      | 3492    | -             | -      | 3595   | -       | 3583    | 3222    | 2848     | -          | -             | 3406              |
| Tobacco   | -       | 2015-16 | -         | -         | -       | 11162         | -      | -      | -       | -       | 13713   | 12907    | -          | -             | 12811             |
|           |         |         | Rabi      | -         | -       | 11162         | -      | -      | -       | -       | 13713   | 12907    | -          | -             | 12811             |
| Tur Arhar | -       | 2015-16 | -         | 7503      | 6520    | -             | 8723   | 6379   | 8197    | 8636    | -       | 7898     | -          | 6257          | 8073              |
|           |         |         | Kharif    | 7503      | 6520    | -             | 8723   | 6379   | 8197    | 8636    | -       | 7898     | -          | 6257          | 8073              |
| Turmeric  | -       | 2015-16 | -         | -         | -       | -             | 7916   | 8116   | 7727    | 6995    | -       | -        | -          | 7785          | 7717              |
|           |         |         | Kharif    | -         | -       | -             | 7916   | 8116   | 7727    | 6995    | -       | -        | -          | 7785          | 7717              |

**Table 2.1 (Contd.) Crop-wise District-wise Farm Harvest Prices of Principal Crops in India - Andhra Pradesh**

(Rs.per Quintal)

| Crop Name | Variety | Year    | Season \$ | Vizianagara<br>m | West<br>Godavari | State Wtd<br>Average |  |  |  |  |  |  |  |  |  |
|-----------|---------|---------|-----------|------------------|------------------|----------------------|--|--|--|--|--|--|--|--|--|
| Sunflower | -       | 2015-16 | Rabi      | -                | -                | 3406                 |  |  |  |  |  |  |  |  |  |
| Tobacco   | -       | 2015-16 | -         | -                | 12693            | 12811                |  |  |  |  |  |  |  |  |  |
|           |         |         | Rabi      | -                | 12693            | 12811                |  |  |  |  |  |  |  |  |  |
| Tur Arhar | -       | 2015-16 | -         | 5285             | -                | 8073                 |  |  |  |  |  |  |  |  |  |
|           |         |         | Kharif    | 5285             | -                | 8073                 |  |  |  |  |  |  |  |  |  |
| Turmeric  | -       | 2015-16 | -         | -                | -                | 7717                 |  |  |  |  |  |  |  |  |  |
|           |         |         | Kharif    | -                | -                | 7717                 |  |  |  |  |  |  |  |  |  |



**Table 2.2 Crop-wise District-wise Farm Harvest Prices of Principal Crops in India - Andman & Nicobar**

(Rs.per Quintal)

| Crop Name    | Variety | Year    | Season \$ | Campbellba<br>y | Car-Nicobar | Diglipur | Ferrargunj | Mayabunder | Nancowrie | Portblair | Rangat | State Wtd<br>Average |  |  |  |
|--------------|---------|---------|-----------|-----------------|-------------|----------|------------|------------|-----------|-----------|--------|----------------------|--|--|--|
| Arecanut     | -       | 2015-16 | -         | 18000           | 7000        | 20000    | 17500      | 20000      | 20000     | 18000     | 18000  | 17500                |  |  |  |
| Cashewnut    | Raw     | 2015-16 | -         | -               | -           | 4000     | 8000       | 4000       | -         | 4000      | -      | 5000                 |  |  |  |
| Chilly       | Green   | 2015-16 | -         | 12000           | 15000       | 8000     | 9000       | 8000       | -         | 10000     | 8000   | 11250                |  |  |  |
| Ginger       | -       | 2015-16 | -         | 20000           | -           | 5000     | 9000       | 15000      | 12000     | 11000     | 16000  | 12000                |  |  |  |
| Maize        | -       | 2015-16 | -         | -               | -           | 3000     | 3000       | 5000       | -         | 2000      | -      | 3200                 |  |  |  |
| Paddy        | -       | 2015-16 | -         | -               | -           | 2500     | 2000       | 2500       | -         | 2000      | 2000   | 2200                 |  |  |  |
| Pepper       | -       | 2015-16 | -         | -               | -           | 75000    | 75000      | 80000      | 80000     | 80000     | 90000  | 80000                |  |  |  |
| Rape/Mustard | -       | 2015-16 | -         | -               | -           | 8000     | -          | 8000       | -         | -         | -      | 8000                 |  |  |  |
| Sesamum      | -       | 2015-16 | -         | -               | -           | -        | -          | 5000       | -         | -         | -      | 5000                 |  |  |  |
| Sugarcane    | -       | 2015-16 | -         | -               | 2000        | 1500     | 2000       | 4000       | 2500      | 1500      | 3000   | 2313                 |  |  |  |
| Tapioca      | -       | 2015-16 | -         | 3000            | 3500        | 2000     | 1500       | 2000       | 3000      | 2000      | 2500   | 2389                 |  |  |  |
| Tur Arhar    | -       | 2015-16 | -         | -               | -           | 9000     | -          | -          | -         | -         | -      | 9000                 |  |  |  |
| Turmeric     | -       | 2015-16 | -         | -               | -           | 10000    | 10000      | 10000      | -         | 12000     | 9000   | 11000                |  |  |  |

**Table 2.3 Crop-wise District-wise Farm Harvest Prices of Principal Crops in India - Assam**

(Rs.per Quintal)

| Crop Name    | Variety | Year    | Season \$ | Barpeta | Bongaigaon | Cachar | Darrang | Dhubri | Dibrugarh | Goalpara | Golaghat | Haikandi | Jorhat | Kamrup | State Wtd Average |
|--------------|---------|---------|-----------|---------|------------|--------|---------|--------|-----------|----------|----------|----------|--------|--------|-------------------|
| Arecanut     | -       | 2015-16 | -         | 2785    | -          | 3097   | 3168    | 2925   | 2991      | 3005     | 3018     | 2783     | 3026   | 2832   | 2961              |
| CasterSeed   | -       | 2015-16 | -         | -       | -          | -      | -       | -      | -         | -        | -        | -        | -      | -      | 7500              |
| Cotton       | -       | 2015-16 | -         | 4657    | -          | -      | -       | -      | -         | -        | -        | -        | -      | -      | 4693              |
| Gram         | -       | 2015-16 | -         | 4541    | -          | -      | -       | 4504   | -         | -        | -        | -        | 4639   | 4299   | 4445              |
| Jute         | -       | 2015-16 | -         | 1653    | 2034       | -      | 1950    | 1932   | -         | 1948     | -        | -        | -      | 1788   | 1890              |
| Linseed      | -       | 2015-16 | -         | 2688    | -          | -      | 2772    | -      | -         | -        | -        | -        | -      | -      | 2809              |
| Maize        | -       | 2015-16 | -         | 1118    | -          | 1151   | -       | -      | -         | -        | -        | -        | -      | 1117   | 1081              |
| Mesta        | -       | 2015-16 | -         | -       | -          | -      | 1470    | -      | -         | -        | -        | -        | -      | -      | 1522              |
| Nigerseed    |         | 2015-16 | -         | 3562    | -          | -      | -       | -      | -         | -        | -        | -        | -      | -      | 3597              |
| Paddy        | -       | 2015-16 | Autum     | -       | 1011       | -      | 10077   | -      | -         | 1000     | -        | 995      | 989    | 1031   | 1035              |
|              |         |         | Summer    | 1050    | 1056       | -      | 1028    | 1055   | -         | 1040     | -        | 1086     | 972    | 1043   | 1041              |
|              |         |         | Winter    | 1133    | 1101       | 1101   | 1121    | -      | 1075      | 1100     | 1092     | 1080     | 1114   | 1116   | 1099              |
| Potato       | -       | 2015-16 | -         | 1552    | 1387       | 1405   | 1378    | 1417   | 1542      | 1555     | 1422     | 1323     | 1340   | 1397   | 1410              |
| Rape/Mustard | -       | 2015-16 | -         | 2891    | 2814       | -      | 2706    | 2574   | 3157      | 2676     | 2900     | 2995     | 2741   | 3120   | 2831              |
| Sesamum      | -       | 2015-16 | -         | 5839    | -          | -      | 6179    | 6095   | 5919      | 6537     | 6218     | -        | -      | 6001   | 6164              |
| Sugar Raw    | -       | 2015-16 | -         | -       | -          | 3876   | 4085    | -      | -         | -        | -        | -        | 4379   | 3880   | 3835              |
| Sugarcane    | -       | 2015-16 | -         | -       | -          | 930    | 952     | -      | -         | -        | -        | -        | 1067   | 1182   | 1044              |
| Tobacco      | -       | 2015-16 | -         | 8444    | -          | -      | -       | -      | -         | -        | 9864     | -        | 8319   | -      | 8510              |
| Tur Arhar    | -       | 2015-16 | -         | 6634    | 6874       | -      | -       | 6867   | -         | -        | -        | -        | -      | 6580   | 6725              |
| Turmeric     | Dry     | 2015-16 | -         | 11024   | 12353      | -      | 11707   | 12508  | -         | 9183     | 11163    | -        | 10036  | 12061  | 10996             |
| Wheat        | -       | 2015-16 | -         | 1508    | 1370       | -      | 1436    | -      | -         | 1464     | -        | -        | -      | 1468   | 1081              |

**Table 2.3 (Contd.) Crop-wise District-wise Farm Harvest Prices of Principal Crops in India - Assam**

(Rs.per Quintal)

| Crop Name    | Variety | Year    | Season \$ | Karbi Anglong | Karimganj | Kokrajhar | Lakhimpur | Morigaon | Nagaon | Nalbari | North Cachar Hills | Sivasagar | Sonitpur | Tinsukia | State Wtd Average |
|--------------|---------|---------|-----------|---------------|-----------|-----------|-----------|----------|--------|---------|--------------------|-----------|----------|----------|-------------------|
| Arecanut     | -       | 2015-16 | -         | 2780          | -         | 3068      | 2880      | 2992     | 3092   | 3239    | 2762               | 3019      | 3057     | -        | 2961              |
| CasterSeed   | -       | 2015-16 | -         | -             | -         | -         | -         | 7500     | -      | -       | -                  | -         | -        | -        | 7500              |
| Cotton       | -       | 2015-16 | -         | -             | -         | -         | -         | -        | -      | -       | -                  | -         | 4719     | -        | 4693              |
| Gram         | -       | 2015-16 | -         | 4397          | -         | -         | -         | -        | -      | -       | -                  | -         | -        | -        | 4445              |
| Jute         | -       | 2015-16 | -         | -             | -         | 1891      | -         | 1939     | 1887   | 1651    | -                  | 1961      | 1884     | -        | 1890              |
| Linseed      | -       | 2015-16 | -         | 3906          | -         | -         | -         | -        | 3167   | -       | -                  | -         | 2695     | -        | 2809              |
| Maize        | -       | 2015-16 | -         | 1060          | -         | 1062      | -         | -        | 1308   | -       | -                  | -         | -        | -        | 1081              |
| Mesta        | -       | 2015-16 | -         | -             | -         | -         | -         | -        | 1441   | -       | -                  | -         | 1601     | -        | 1522              |
| Nigerseed    |         | 2015-16 | -         | -             | -         | 3672      | -         | 3585     | -      | -       | -                  | -         | -        | -        | 3597              |
| Paddy        | -       | 2015-16 | Autum     | -             | -         | 1060      | -         | -        | -      | -       | -                  | -         | 1042     | -        | 1035              |
|              |         |         | Summer    | -             | -         | -         | -         | 1027     | 1034   | 1123    | -                  | -         | 1022     | -        | 1041              |
|              |         |         | Winter    | 1113          | 1099      | 1116      | 1097      | 1083     | 1121   | 1120    | -                  | 1081      | 1080     | -        | 1099              |
| Potato       | -       | 2015-16 | -         | 1454          | -         | 1427      | 1418      | 1463     | 1495   | 1211    | 1494               | 1416      | 1278     | -        | 1410              |
| Rape/Mustard | -       | 2015-16 | -         | 3271          | -         | 2897      | 2896      | 2609     | 2748   | -       | 2760               | -         | 2544     | 3088     | 2831              |
| Sesamum      | -       | 2015-16 | -         | 6288          | -         | 6070      | 6122      | 6080     | 5821   | 6123    | -                  | -         | -        | -        | 6164              |
| Sugar Raw    | -       | 2015-16 | -         | 3762          | 4162      | -         | 4125      | 3751     | 3657   | 3859    | -                  | 3998      | 3911     | -        | 3835              |
| Sugarcane    | -       | 2015-16 | -         | 1010          | 1102      | -         | 1111      | 928      | 1101   | 930     | -                  | 1034      | 1090     | -        | 1044              |
| Tobacco      | -       | 2015-16 | -         | 8339          | -         | -         | -         | -        | -      | -       | -                  | -         | -        | -        | 8510              |
| Tur Arhar    | -       | 2015-16 | -         | 6738          | -         | -         | -         | -        | -      | -       | -                  | -         | -        | -        | 6725              |
| Turmeric     | Dry     | 2015-16 | -         | 10935         | 12384     | 11165     | 11277     | 9681     | 9158   | 9473    | 12988              | -         | -        | -        | 10996             |
| Wheat        | -       | 2015-16 | -         | 1446          | -         | -         | -         | 1370     | 1532   | -       | -                  | -         | -        | -        | 1081              |

**Table 2.4 Crop-wise District-wise Farm Harvest Prices of Principal Crops in India - Bihar**

(Rs.per Quintal)

| Crop Name    | Variety | Year    | Season \$ | Aurangabad | Jahanabad | Araia | Arbal | Banka | Begusarai | Bhabua (Kymmur) | Bhagalpur | Bhojpur (Aara) | Buxar | Darbhanga | State Wtd Average |
|--------------|---------|---------|-----------|------------|-----------|-------|-------|-------|-----------|-----------------|-----------|----------------|-------|-----------|-------------------|
| Bajra        | -       | 2015-16 | Kharif    | -          | -         | -     | -     | -     | -         | -               | 1177      | 1177           | 1177  | -         | 1177              |
| Barley       | -       | 2015-16 | Rabi      | 1144       | 1144      | -     | 1125  | 1100  | 1144      | 1010            | 1100      | 1010           | 1010  | 1144      | 1144              |
| Chilly       | -       | 2015-16 | Rabi      | -          | 5500      | 5691  | 5500  | -     | 5500      | -               | 5691      | 5691           | -     | -         | 5691              |
| Ginger       | -       | 2015-16 | Rabi      | -          | -         | -     | -     | -     | -         | -               | -         | -              | -     | -         | 3208              |
| Gram         | -       | 2015-16 | Rabi      | 3650       | 3650      | 3624  | 3650  | 3624  | 3980      | 3105            | 3624      | 3105           | 3105  | 3624      | 3624              |
| Ground Nut   | -       | 2015-16 | Kharif    | 6602       | -         | -     | -     | -     | 6602      | -               | -         | -              | -     | -         | 6602              |
| Jowar        | -       | 2015-16 | Kharif    | -          | -         | -     | -     | -     | 869       | -               | 869       | 869            | 872   | -         | 869               |
| Jute         | -       | 2015-16 | Kharif    | -          | -         | 3550  | -     | -     | -         | -               | -         | -              | -     | -         | 3276              |
| Linseed      | -       | 2015-16 | Rabi      | 3060       | 3060      | -     | 3060  | 3100  | 2911      | 3060            | 3100      | 3060           | 3060  | 3060      | 3060              |
| Maize        | -       | 2015-16 | Kharif    | 1079       | 1079      | 1037  | 1079  | 1057  | 937       | 1079            | 1057      | 1045           | 1275  | 1079      | 1079              |
|              |         |         | Rabi      | 920        | 920       | 1148  | 920   | 1135  | 1150      | -               | 1135      | 1135           | -     | 1135      | 1135              |
| Mesta        | -       | 2015-16 | Kharif    | -          | -         | 2100  | -     | -     | 1895      | -               | 1895      | -              | -     | -         | 1895              |
| Paddy        | Bhadea  | 2015-16 | Kharif    | -          | -         | 1097  | -     | -     | 1200      | -               | 1114      | 1114           | 1114  | 1114      | 1114              |
| Potato       | -       | 2015-16 | Kharif    | 800        | 787       | 787   | 787   | 787   | 750       | 900             | 787       | 816            | 787   | 700       | 787               |
|              |         |         | Rabi      | 655        | 655       | 667   | 655   | 766   | 800       | -               | 766       | 766            | 766   | 766       | 766               |
| Ragi         | -       | 2015-16 | Kharif    | 995        | 995       | -     | 995   | -     | 1066      | -               | -         | -              | -     | 1066      | 1066              |
| Rape/Mustard | -       | 2015-16 | Rabi      | 3250       | 3250      | 3395  | 3250  | 3600  | 3395      | 3395            | 3600      | 3395           | 3320  | 3395      | 3395              |
| Sesamum      | -       | 2015-16 | Kharif    | 4652       | -         | -     | -     | -     | 4652      | -               | -         | -              | -     | -         | 4652              |
|              |         |         | Rabi      | 5489       | -         | -     | 5489  | -     | 5489      | -               | 5489      | 5489           | -     | -         | 5489              |
| Tur Arhar    | -       | 2015-16 | Rabi      | 3625       | 3625      | 3625  | 3625  | 3625  | 3625      | 3500            | 3625      | 3500           | 3500  | 3625      | 3625              |
| Turmeric     | -       | 2015-16 | Rabi      | 7000       | -         | -     | 7000  | -     | 8000      | -               | 8019      | -              | -     | -         | 8019              |
| Wheat        | -       | 2015-16 | Rabi      | 1284       | 1284      | 1331  | 1284  | 1200  | 1284      | 1155            | 1200      | 1155           | 1155  | 1367      | 1284              |

**Table 2.4 (Contd.) Crop-wise District-wise Farm Harvest Prices of Principal Crops in India - Bihar**

(Rs.per Quintal)

| Crop Name    | Variety | Year    | Season \$ | East Champaran | Gaya | Gopalganj | Jumui | Katihar | Khagaria | Kishanganj | Lakhisarai | Madhepura | Madhubani | Munger | State Wtd Average |
|--------------|---------|---------|-----------|----------------|------|-----------|-------|---------|----------|------------|------------|-----------|-----------|--------|-------------------|
| Bajra        | -       | 2015-16 | Kharif    | -              | -    | 1177      | -     | -       | -        | -          | -          | -         | -         | -      | 1177              |
| Barley       | -       | 2015-16 | Rabi      | -              | 1300 | -         | 1144  | 1144    | 1144     | -          | -          | -         | 1144      | -      | 1144              |
| Chilly       | -       | 2015-16 | Rabi      | 5000           | 5500 | -         | -     | 5691    | 5500     | 5691       | -          | 5800      | 5691      | -      | 5691              |
| Ginger       | -       | 2015-16 | Rabi      | 3090           | -    | -         | -     | -       | 3208     | 3208       | -          | 3180      | -         | -      | 3208              |
| Gram         | -       | 2015-16 | Rabi      | -              | 3650 | -         | 3980  | 3624    | 3980     | 3624       | 3980       | -         | 3624      | 3980   | 3624              |
| Ground Nut   | -       | 2015-16 | Kharif    | -              | 6700 | -         | -     | -       | -        | -          | -          | 6602      | -         | -      | 6602              |
| Jowar        | -       | 2015-16 | Kharif    | -              | -    | -         | -     | -       | -        | -          | -          | -         | -         | -      | 869               |
| Jute         | -       | 2015-16 | Kharif    | -              | -    | -         | -     | 3149    | -        | 3276       | -          | 3276      | -         | -      | 3276              |
| Linseed      | -       | 2015-16 | Rabi      | 3225           | 3060 | -         | 2911  | 3060    | 2911     | 3060       | 2911       | 3060      | 3060      | 2911   | 3060              |
| Maize        | -       | 2015-16 | Kharif    | 1050           | 1300 | 1079      | 1079  | 1079    | 1079     | 1079       | 1079       | 1079      | 1079      | 1079   | 1079              |
|              |         |         | Rabi      | 1139           | 920  | 1011      | 1175  | 1135    | 1135     | 1095       | 1135       | 1135      | 1135      | 1135   | 1135              |
| Mesta        | -       | 2015-16 | Kharif    | -              | -    | -         | -     | 2100    | 1895     | 2100       | -          | 1895      | 1895      | -      | 1895              |
| Paddy        | Bhadea  | 2015-16 | Kharif    | 1114           | -    | 1135      | -     | 1114    | 955      | 922        | -          | 1114      | 1200      | 1114   | 1114              |
| Potato       | -       | 2015-16 | Kharif    | 787            | 730  | 848       | 750   | 787     | 787      | 846        | 750        | 787       | 700       | 750    | 787               |
|              |         |         | Rabi      | 800            | 655  | 665       | 766   | 667     | 766      | 667        | 766        | 766       | 766       | 766    | 817               |
| Ragi         | -       | 2015-16 | Kharif    | -              | 995  | 1225      | -     | -       | -        | 1066       | -          | 940       | 1066      | -      | 1066              |
| Rape/Mustard | -       | 2015-16 | Rabi      | 3000           | 3250 | 3395      | 3395  | 3395    | 3395     | 3395       | 3395       | 3395      | 3395      | 3395   | 3395              |
| Sesamum      | -       | 2015-16 | Kharif    | -              | 3850 | -         | -     | -       | -        | 4652       | -          | 4652      | 4652      | -      | 4652              |
|              |         |         | Rabi      | 5500           | -    | -         | -     | -       | -        | 5489       | -          | 5483      | 5489      | -      | 5489              |
| Tur Arhar    | -       | 2015-16 | Rabi      | 3200           | 3150 | 3392      | 3625  | 3625    | 3625     | -          | 3625       | 3625      | 3625      | 3625   | 3625              |
| Turmeric     | -       | 2015-16 | Rabi      | 8019           | 7000 | -         | -     | 8019    | 8000     | 8019       | -          | 8200      | 8019      | -      | 8019              |
| Wheat        | -       | 2015-16 | Rabi      | 1410           | 1284 | 1284      | 1284  | 1284    | 1284     | 1352       | 1284       | 1250      | 1367      | 1284   | 1284              |

**Table 2.4 (Contd.) Crop-wise District-wise Farm Harvest Prices of Principal Crops in India - Bihar**

(Rs.per Quintal)

| Crop Name    | Variety | Year    | Season \$ | Muzaffarpur | Nalanda | Nawada | Patna | Purnia | Rohtas | Saharsa | Samastipur | Saran (Chapra) | Sheikhpura | Sheohar | State Wtd Average |
|--------------|---------|---------|-----------|-------------|---------|--------|-------|--------|--------|---------|------------|----------------|------------|---------|-------------------|
| Bajra        | -       | 2015-16 | Kharif    | -           | -       | -      | -     | -      | -      | -       | -          | -              | -          | -       | 1177              |
| Barley       | -       | 2015-16 | Rabi      | 1144        | 1010    | -      | 1010  | -      | 1010   | 1144    | 1144       | 1144           | -          | -       | 1144              |
| Chilly       | -       | 2015-16 | Rabi      | 5000        | 5691    | -      | 5691  | 5691   | 5691   | -       | 5691       | -              | 5500       | 5000    | 5691              |
| Ginger       | -       | 2015-16 | Rabi      | 3090        | -       | -      | -     | -      | 3208   | -       | 5000       | -              | -          | 3090    | 3208              |
| Gram         | -       | 2015-16 | Rabi      | 3624        | 3105    | 3650   | 3105  | -      | 3105   | -       | 3624       | 3624           | 3980       | -       | 3624              |
| Ground Nut   | -       | 2015-16 | Kharif    | -           | 6446    | 5690   | -     | -      | 6446   | -       | -          | -              | -          | -       | 6602              |
| Jowar        | -       | 2015-16 | Kharif    | -           | -       | -      | 860   | -      | -      | -       | 869        | -              | -          | -       | 869               |
| Jute         | -       | 2015-16 | Kharif    | -           | -       | -      | -     | 3276   | -      | 3276    | 3276       | -              | -          | -       | 3276              |
| Linseed      | -       | 2015-16 | Rabi      | 3225        | 3060    | 3060   | 3060  | 3060   | 3060   | 3060    | 3060       | 3060           | 2911       | 3225    | 3060              |
| Maize        | -       | 2015-16 | Kharif    | 1057        | 1074    | 1085   | 1079  | 948    | 1079   | 1073    | 1079       | 1079           | 1194       | 1079    | 1079              |
|              |         |         | Rabi      | 1139        | 1135    | -      | 1135  | 1135   | 1135   | 1135    | 1135       | 1135           | 1011       | 1135    | 1139              |
| Mesta        | -       | 2015-16 | Kharif    | 1895        | -       | -      | -     | 2100   | -      | 2060    | 1895       | -              | -          | -       | 1895              |
| Paddy        | Bhadea  | 2015-16 | Kharif    | 1045        | -       | 1114   | 1114  | 837    | 1114   | 1060    | 1100       | 1135           | -          | 1114    | 1114              |
| Potato       | -       | 2015-16 | Kharif    | 787         | 787     | 750    | 787   | 803    | 787    | 787     | 700        | 848            | 750        | 787     | 787               |
|              |         |         | Rabi      | 766         | 805     | 655    | 766   | 667    | 755    | 766     | 766        | 766            | 665        | 766     | 766               |
| Ragi         | -       | 2015-16 | Kharif    | 1260        | 1066    | 995    | 1066  | -      | -      | 940     | 1066       | 1066           | -          | 1260    | 1066              |
| Rape/Mustard | -       | 2015-16 | Rabi      | 3000        | 3564    | 3250   | 3395  | 3395   | 3395   | 3395    | 3395       | 3395           | 3395       | 3000    | 3395              |
| Sesamum      | -       | 2015-16 | Kharif    | -           | -       | 4650   | -     | -      | -      | 4900    | 4652       | 4652           | -          | 4652    | 4652              |
|              |         |         | Rabi      | 5500        | -       | -      | 5489  | -      | -      | 5483    | 5489       | -              | 5489       | 5500    | 5489              |
| Tur Arhar    | -       | 2015-16 | Rabi      | 3200        | 3500    | 4810   | 3500  | 3625   | 3500   | -       | 3625       | 3392           | 3625       | 3200    | 3625              |
| Turmeric     | -       | 2015-16 | Rabi      | 8019        | 8019    | -      | 8019  | -      | 8019   | -       | 8019       | -              | 8000       | 8019    | 8019              |
| Wheat        | -       | 2015-16 | Rabi      | 1360        | 1155    | 1284   | 1155  | 1326   | 1155   | 1250    | 1367       | 1284           | 1284       | 1284    | 1284              |



**Table 2.4 (Contd.) Crop-wise District-wise Farm Harvest Prices of Principal Crops in India - Bihar**

(Rs.per Quintal)

| Crop Name    | Variety | Year    | Season \$ | Sitamarhi | Siwan | Supaul | Vaishali | West Champaran | State Wtd Average |  |  |  |  |  |  |
|--------------|---------|---------|-----------|-----------|-------|--------|----------|----------------|-------------------|--|--|--|--|--|--|
| Bajra        | -       | 2015-16 | Kharif    | -         | 1177  | -      | -        | -              | 1177              |  |  |  |  |  |  |
| Barley       | -       | 2015-16 | Rabi      | 1144      | 1144  | -      | 1144     | 1144           | 1144              |  |  |  |  |  |  |
| Chilly       | -       | 2015-16 | Rabi      | 5000      | 5691  | 5800   | 5000     | 5000           | 5691              |  |  |  |  |  |  |
| Ginger       | -       | 2015-16 | Rabi      | -         | 3208  | 3180   | -        | 3090           | 3208              |  |  |  |  |  |  |
| Gram         | -       | 2015-16 | Rabi      | -         | 3624  | -      | 3624     | 3624           | 3624              |  |  |  |  |  |  |
| Ground Nut   | -       | 2015-16 | Kharif    | -         | -     | -      | -        | 6602           | 6602              |  |  |  |  |  |  |
| Jowar        | -       | 2015-16 | Kharif    | -         | -     | -      | -        | -              | 869               |  |  |  |  |  |  |
| Jute         | -       | 2015-16 | Kharif    | -         | -     | 3276   | -        | -              | 3276              |  |  |  |  |  |  |
| Linseed      | -       | 2015-16 | Rabi      | 3225      | 3060  | 3060   | 3225     | 3225           | 3060              |  |  |  |  |  |  |
| Maize        | -       | 2015-16 | Kharif    | 1101      | 1079  | 1200   | 1295     | 1079           | 1079              |  |  |  |  |  |  |
|              |         |         | Rabi      | 1139      | 1011  | 1135   | 1139     | 1139           | 1135              |  |  |  |  |  |  |
| Mesta        | -       | 2015-16 | Kharif    | -         | 1895  | 1880   | 1895     | 1895           | 1895              |  |  |  |  |  |  |
| Paddy        | Bhadea  | 2015-16 | Kharif    | 1188      | 1135  | 1150   | 1114     | 1114           | 1114              |  |  |  |  |  |  |
| Potato       | -       | 2015-16 | Kharif    | -         | 848   | 787    | 787      | 787            | 787               |  |  |  |  |  |  |
|              |         |         | Rabi      | 766       | 665   | 766    | 782      | 766            | 766               |  |  |  |  |  |  |
| Ragi         | -       | 2015-16 | Kharif    | 1260      | 1526  | 940    | 1260     | 1260           | 1066              |  |  |  |  |  |  |
| Rape/Mustard | -       | 2015-16 | Rabi      | 3000      | 3395  | 3395   | 3000     | 3000           | 3395              |  |  |  |  |  |  |
| Sesamum      | -       | 2015-16 | Kharif    | 4652      | 4652  | 4700   | 4652     | 4652           | 4652              |  |  |  |  |  |  |
|              |         |         | Rabi      | -         | -     | 5483   | -        | 5500           | 5489              |  |  |  |  |  |  |
| Tur Arhar    | -       | 2015-16 | Rabi      | 3200      | 3392  | 3600   | 3200     | 3200           | 3625              |  |  |  |  |  |  |
| Turmeric     | -       | 2015-16 | Rabi      | -         | 8019  | 8200   | -        | 8019           | 8019              |  |  |  |  |  |  |
| Wheat        | -       | 2015-16 | Rabi      | 1284      | 1284  | 1250   | 1284     | 1284           | 1284              |  |  |  |  |  |  |

**Table 2.5 Crop-wise District-wise Farm Harvest Prices of Principal Crops in India - Chandigarh**

(Rs.per Quintal)

| Crop Name | Variety | Year    | Season \$ | Chandigarh | State Wtd Average |  |  |  |  |  |  |  |  |  |  |
|-----------|---------|---------|-----------|------------|-------------------|--|--|--|--|--|--|--|--|--|--|
| Maize     | -       | 2015-16 | -         | 1241       | 1241              |  |  |  |  |  |  |  |  |  |  |
| Paddy     | -       | 2015-16 | -         | 1451       | 1451              |  |  |  |  |  |  |  |  |  |  |
| Potato    | -       | 2015-16 | -         | 1050       | 1050              |  |  |  |  |  |  |  |  |  |  |
| Wheat     | -       | 2015-16 | -         | 1580       | 1580              |  |  |  |  |  |  |  |  |  |  |

**Table 2.6 Crop-wise District-wise Farm Harvest Prices of Principal Crops in India - Chhattisgarh**

(Rs.per Quintal)

| Crop Name    | Variety | Year    | Season \$ | Bagipur | Balothe | Balrampur | Bastar | Bemethra | Bilaspur | Dantewada | Dhamtari | Durg  | Janjgir-Champa | Jashpur | State Wtd Average |
|--------------|---------|---------|-----------|---------|---------|-----------|--------|----------|----------|-----------|----------|-------|----------------|---------|-------------------|
| Bajra        | -       | 2015-16 | -         | -       | -       | -         | -      | -        | 2500     | -         | -        | -     | -              | -       | 2197              |
| Barley       | -       | 2015-16 | -         | -       | -       | 2433      | -      | -        | 2033     | -         | -        | -     | -              | -       | 2001              |
| CasterSeed   | -       | 2015-16 | -         | -       | -       | -         | -      | -        | 2220     | -         | -        | -     | -              | -       | 2220              |
| Chilly       | Dry     | 2015-16 | -         | -       | -       | 11258     | 13333  | 11830    | 12195    | 12000     | -        | 12982 | 9900           | 13263   | 11180             |
| Ginger       | Fresh   | 2015-16 | -         | -       | -       | 6775      | 6500   | 5069     | 7205     | 7143      | -        | -     | 5238           | 6363    | 6461              |
| Gram         | -       | 2015-16 | -         | 7385    | 5050    | 5538      | -      | 4767     | 4940     | -         | 4597     | 4034  | -              | 6353    | 5609              |
| Ground Nut   | -       | 2015-16 | -         | -       | -       | 4810      | -      | 5003     | 7003     | 6000      | -        | -     | 6063           | 4045    | 5786              |
| Jowar        | -       | 2015-16 | Kharif    | -       | -       | 3908      | -      | -        | 1465     | -         | -        | -     | -              | -       | 2299              |
|              |         |         | Rabi      | -       | -       | 1940      | -      | -        | 1767     | -         | -        | -     | -              | -       | 1888              |
| Linseed      | -       | 2015-16 | -         | 8667    | -       | 4120      | -      | 5000     | 4457     | -         | 4044     | -     | -              | -       | 5440              |
| Maize        | -       | 2015-16 | -         | -       | -       | 970       | 2800   | 2000     | 2207     | 1000      | -        | -     | 1000           | 1612    | 1702              |
| Nigerseed    | -       | 2015-16 | -         | -       | -       | 5069      | -      | -        | 6150     | -         | -        | -     | -              | 5000    | 5327              |
| Paddy        | Coarse  | 2015-16 | -         | -       | 1410    | 1425      | 1250   | 1250     | 1235     | 1000      | 1344     | 1410  | 1410           | 1148    | 1299              |
|              | Fine    | 2015-16 | -         | -       | -       | -         | 1441   | 1499     | -        | -         | 1610     | 1450  | 1450           | 1229    | 1619              |
|              | Medium  | 2015-16 | -         | 1400    | -       | 1737      | 1200   | 1343     | 1441     | -         | 1450     | 1410  | 1450           | 1185    | 1392              |
| Potato       | Hills   | 2015-16 | Summer    | -       | -       | 1600      | -      | 1837     | 1715     | 2000      | -        | -     | 2000           | 1950    | 1794              |
|              |         |         | Winter    | -       | -       | 1600      | -      | 2000     | 1514     | 1857      | -        | -     | -              | -       | 1547              |
| Ragi         | -       | 2015-16 | -         | -       | -       | 1561      | -      | -        | -        | -         | -        | -     | -              | -       | 1744              |
| Rape/Mustard | -       | 2015-16 | -         | -       | -       | 4430      | -      | -        | 4416     | -         | -        | -     | -              | 3030    | 4976              |
| Rice         | Coarse  | 2015-16 | -         | 3000    | -       | 1954      | 2000   | -        | 1893     | -         | -        | -     | -              | 2609    | 2265              |
|              | Fine    | 2015-16 | -         | 8000    | -       | 4017      | 4000   | 4657     | -        | 4560      | -        | 3755  | -              | 4019    | 4352              |
|              | Medium  | 2015-16 | -         | 4000    | -       | 2982      | 2800   | 2610     | 2500     | 3350      | -        | 2199  | -              | 2677    | 2774              |
| Sannhemp     | -       | 2015-16 | -         | -       | -       | 4213      | -      | -        | -        | -         | -        | -     | -              | -       | 4213              |
| Sesamum      | -       | 2015-16 | Kharif    | 25000   | -       | 7454      | -      | 8600     | -        | -         | 11174    | 10000 | -              | -       | 10056             |
|              |         |         | Rabi      | 20462   | -       | 7000      | -      | -        | 8393     | -         | -        | -     | -              | 7375    | 11337             |
| Soyabean     | -       | 2015-16 | -         | -       | -       | 4280      | -      | 3283     | 3946     | -         | -        | -     | -              | -       | 3598              |
| Sugar Raw    | -       | 2015-16 | -         | -       | -       | 3986      | 3533   | 3575     | 3862     | 3815      | -        | -     | 3800           | 3619    | 3903              |
| Tobacco      | -       | 2015-16 | -         | -       | -       | 7179      | -      | 14906    | 12954    | -         | -        | 15711 | -              | 13010   | 11169             |
| Tur Arhar    | Delay   | 2015-16 | -         | -       | 11300   | 9322      | -      | 7567     | 8127     | -         | -        | 5967  | -              | 8350    | 8436              |
|              | Early   | 2015-16 | -         | -       | 11000   | 7117      | -      | 7586     | 7893     | -         | -        | 6994  | -              | 6929    | 7990              |
| Turmeric     | -       | 2015-16 | -         | -       | -       | 7456      | -      | -        | 11326    | -         | -        | -     | -              | 9835    | 9611              |
| Wheat        | -       | 2015-16 | -         | 2978    | 2471    | 1660      | -      | 1507     | 1917     | -         | 2397     | 2327  | 2133           | 1763    | 2102              |

**Table 2.6 (Contd.) Crop-wise District-wise Farm Harvest Prices of Principal Crops in India - Chhattisgarh**

(Rs.per Quintal)

| Crop Name    | Variety | Year    | Season \$ | Kawardha | Korba | Koriya | Mahasamund | Mugeli | Narayanpur | Raigarh | Raipur | Rajnandgaon | Sukma | Surguja | State Wtd Average |
|--------------|---------|---------|-----------|----------|-------|--------|------------|--------|------------|---------|--------|-------------|-------|---------|-------------------|
| Bajra        | -       | 2015-16 | -         | -        | -     | -      | -          | -      | 3000       | 1414    | -      | -           | -     | -       | 2197              |
| Barley       | -       | 2015-16 | -         | -        | -     | -      | -          | -      | -          | 1621    | -      | -           | -     | -       | 2001              |
| CasterSeed   | -       | 2015-16 | -         | -        | -     | -      | -          | -      | -          | -       | -      | -           | -     | -       | 2220              |
| Chilly       | Dry     | 2015-16 | -         | 11323    | -     | 10238  | 10048      | 8000   | 7678       | 12367   | -      | 11958       | 11000 | -       | 11180             |
| Ginger       | Fresh   | 2015-16 | -         | 8017     | -     | 7578   | 5025       | -      | 7889       | 4928    | -      | -           | 7895  | 5000    | 6461              |
| Gram         | -       | 2015-16 | -         | 5616     | 5917  | 6452   | 6308       | -      | 4263       | 4688    | 9775   | -           | -     | 6333    | 5609              |
| Ground Nut   | -       | 2015-16 | -         | 4430     | -     | 6286   | 5533       | -      | 10000      | 4259    | -      | -           | -     | 7045    | 5786              |
| Jowar        | -       | 2015-16 | Kharif    | -        | -     | -      | -          | -      | 2368       | 2059    | -      | -           | -     | -       | 2299              |
|              |         |         | Rabi      | -        | -     | -      | -          | -      | -          | 1962    | -      | -           | -     | -       | -                 |
| Linseed      | -       | 2015-16 | -         | 3500     | -     | 4230   | 10485      | -      | 8000       | 5682    | -      | -           | -     | -       | 5440              |
| Maize        | -       | 2015-16 | -         | 3100     | 1880  | 1318   | 2114       | 4571   | 1194       | 1330    | -      | -           | -     | 1280    | 1702              |
| Nigerseed    | -       | 2015-16 | -         | -        | -     | -      | -          | -      | 7342       | 3750    | -      | -           | -     | -       | 5327              |
| Paddy        | Coarse  | 2015-16 | -         | 1365     | -     | 1190   | -          | -      | -          | 1361    | 1300   | 1230        | -     | 1367    | 1299              |
|              | Fine    | 2015-16 | -         | 1473     | -     | 2430   | 1700       | 3000   | -          | 1450    | 1545   | 1426        | -     | -       | 1619              |
|              | Medium  | 2015-16 | -         | 1298     | -     | 1375   | 1496       | -      | -          | 1395    | 1375   | 1343        | -     | -       | 1392              |
| Potato       | Hills   | 2015-16 | Summer    | -        | -     | 1783   | 2211       | -      | -          | 1487    | -      | -           | -     | 1500    | 1794              |
|              |         |         | Winter    | -        | -     | -      | 2000       | -      | 1000       | 1181    | -      | -           | -     | -       | -                 |
| Ragi         | -       | 2015-16 | -         | -        | -     | -      | -          | -      | 1700       | -       | -      | 2000        | -     | -       | 1744              |
| Rape/Mustard | -       | 2015-16 | -         | 3400     | 6269  | 4750   | 8500       | 4000   | 6159       | 7401    | -      | -           | -     | -       | 4976              |
| Rice         | Coarse  | 2015-16 | -         | 2124     | 2225  | 2008   | 2477       | 2520   | 2120       | 2031    | -      | 2468        | -     | 2150    | 2265              |
|              | Fine    | 2015-16 | -         | 4537     | 4050  | 4082   | 4260       | -      | 3494       | 3680    | -      | 4350        | -     | 5000    | 4352              |
|              | Medium  | 2015-16 | -         | 3080     | 3395  | 2410   | 2900       | -      | 3075       | 2472    | -      | 2408        | -     | 2115    | 2774              |
| Sannhemp     | -       | 2015-16 | -         | -        | -     | -      | -          | -      | -          | -       | -      | -           | -     | -       | 4213              |
| Sesamum      | -       | 2015-16 | Kharif    | -        | -     | 12595  | 7217       | 8600   | 6461       | 8709    | -      | 13550       | -     | 9000    | 10056             |
|              |         |         | Rabi      | -        | -     | 11330  | 15667      | -      | 15000      | 9879    | -      | 13268       | -     | -       | -                 |
| Soyabean     | -       | 2015-16 | -         | 3425     | -     | -      | -          | -      | -          | 3175    | -      | -           | -     | -       | 3598              |
| Sugar Raw    | -       | 2015-16 | -         | 3598     | -     | 3959   | 4008       | 3145   | 4448       | 4214    | -      | -           | -     | 4330    | 3903              |
| Tobacco      | -       | 2015-16 | -         | -        | -     | -      | 10442      | -      | -          | 14448   | -      | -           | -     | 5667    | 11169             |
| Tur Arhar    | Delay   | 2015-16 | -         | -        | -     | 7184   | 8500       | -      | -          | 10294   | -      | -           | -     | 9000    | 8436              |
|              | Early   | 2015-16 | -         | 7623     | -     | 6000   | 7571       | 8250   | 6500       | 10256   | -      | -           | -     | 9000    | 7990              |
| Turmeric     | -       | 2015-16 | -         | 10000    | -     | 7890   | 7869       | 12313  | 8464       | 12515   | -      | -           | -     | 10000   | 9611              |
| Wheat        | -       | 2015-16 | -         | 1727     | -     | 2141   | 2708       | -      | 2138       | 2102    | 1813   | -           | -     | 2400    | 2102              |

**Table 2.7 Crop-wise District-wise Farm Harvest Prices of Principal Crops in India - Delhi**

(Rs.per Quintal)

| Crop Name | Variety | Year    | Season \$ | Delhi | State Wtd Average |  |  |  |  |  |  |  |  |  |  |
|-----------|---------|---------|-----------|-------|-------------------|--|--|--|--|--|--|--|--|--|--|
| Bajra     | -       | 2015-16 | -         | 1650  | 1650              |  |  |  |  |  |  |  |  |  |  |
| Barley    | -       | 2015-16 | -         | 1450  | 1450              |  |  |  |  |  |  |  |  |  |  |
| Gram      | -       | 2015-16 | -         | 5000  | 5000              |  |  |  |  |  |  |  |  |  |  |
| Jowar     | -       | 2015-16 | -         | 1750  | 1750              |  |  |  |  |  |  |  |  |  |  |
| Maize     | -       | 2015-16 | -         | 1720  | 1720              |  |  |  |  |  |  |  |  |  |  |
| Paddy     | -       | 2015-16 | -         | 1450  | 1450              |  |  |  |  |  |  |  |  |  |  |
| Potato    | -       | 2015-16 | -         | 1800  | 1800              |  |  |  |  |  |  |  |  |  |  |
| Wheat     | -       | 2015-16 | -         | 1525  | 1525              |  |  |  |  |  |  |  |  |  |  |

**Table 2.8 Crop-wise District-wise Farm Harvest Prices of Principal Crops in India - Goa**

(Rs.per Quintal)

| Crop Name | Variety | Year    | Season \$ | Goa   | State Wtd Average |  |  |  |  |  |  |  |  |  |  |
|-----------|---------|---------|-----------|-------|-------------------|--|--|--|--|--|--|--|--|--|--|
| Arecanut  | -       | 2015-16 | -         | 23000 | 23000             |  |  |  |  |  |  |  |  |  |  |
| Cashewnut | -       | 2015-16 | -         | 12200 | 12200             |  |  |  |  |  |  |  |  |  |  |
| Paddy     | -       | 2015-16 | -         | 1020  | 1020              |  |  |  |  |  |  |  |  |  |  |
| Ragi      | -       | 2015-16 | -         | 3500  | 3500              |  |  |  |  |  |  |  |  |  |  |
| Sugarcane | -       | 2015-16 | -         | 250   | 250               |  |  |  |  |  |  |  |  |  |  |

**Table 2.9 Crop-wise District-wise Farm Harvest Prices of Principal Crops in India - Gujarat**

(Rs.per Quintal)

| Crop Name    | Variety | Year    | Season \$ | Ahmedabad | Amreli | Anand | Banaskanth | Bharuch | Bhavnagar | Dahod | Gandhinagar | Jamnagar | Junagadh | Kachchh | State Wtd Average |
|--------------|---------|---------|-----------|-----------|--------|-------|------------|---------|-----------|-------|-------------|----------|----------|---------|-------------------|
| Bajra        | -       | 2015-16 | Kharif    | 1171      | 1852   | 1068  | 1194       | 1460    | 1010      | -     | 1240        | 1174     | -        | 1408    | 1261              |
|              |         |         | Summer    | -         | -      | -     | -          | -       | -         | -     | -           | -        | -        | -       | -                 |
| CasterSeed   | -       | 2015-16 | -         | 3897      | -      | 3544  | 3972       | 3888    | -         | -     | 3800        | 3530     | 3623     | 4010    | 3794              |
| Chilly       | Dry     | 2015-16 | -         | -         | 6400   | -     | -          | -       | 14952     | -     | -           | 6206     | -        | -       | 10237             |
| Cotton       | Desi    | 2015-16 | -         | 3025      | -      | -     | -          | -       | -         | -     | -           | -        | -        | -       | 3088              |
|              | Hybrid  | 2015-16 | -         | 3994      | 4741   | 4243  | 4142       | 4007    | 4564      | -     | 3975        | 4173     | 4147     | 4089    | 4078              |
| Gram         | -       | 2015-16 | -         | 3453      | -      | 3288  | -          | 4448    | -         | 4041  | -           | 2811     | 2977     | -       | 3451              |
| Ground Nut   | -       | 2015-16 | Kharif    | 3650      | 3276   | -     | -          | 3899    | 4421      | -     | 3850        | 3471     | 3904     | 3668    | 3681              |
|              |         |         | Rabi      | -         | -      | -     | -          | -       | -         | -     | -           | -        | -        | -       | -                 |
| Jowar        | -       | 2015-16 | -         | -         | -      | -     | 3081       | 2357    | -         | -     | 1575        | -        | 1733     | 2143    | 2031              |
| Maize        | -       | 2015-16 | -         | -         | -      | -     | 1378       | 1375    | -         | 1413  | 1350        | -        | -        | -       | 1284              |
| Paddy        | -       | 2015-16 | -         | 1607      | -      | 1231  | -          | 2020    | -         | 1384  | 1540        | -        | -        | -       | 1437              |
| Potato       | -       | 2015-16 | -         | -         | -      | -     | 1355       | -       | -         | -     | -           | -        | -        | -       | 1075              |
| Ragi         | -       | 2015-16 | -         | -         | -      | -     | -          | -       | -         | -     | -           | -        | -        | -       | 1400              |
| Rape/Mustard | -       | 2015-16 | -         | -         | -      | -     | 3292       | -       | -         | -     | -           | -        | -        | 2881    | 3622              |
| Sesamum      | -       | 2015-16 | -         | -         | 11533  | 6063  | 9182       | -       | 6148      | -     | 8365        | 11170    | -        | 9502    | 9202              |
| Sugarcane    | -       | 2015-16 | -         | -         | -      | -     | 714        | -       | -         | -     | -           | -        | -        | 275     | -                 |
| Tobacco      | -       | 2015-16 | -         | -         | -      | 5571  | -          | -       | -         | -     | -           | -        | -        | -       | 4611              |
| Tur Arhar    | -       | 2015-16 | -         | -         | -      | -     | -          | 5433    | -         | -     | 4835        | -        | -        | -       | 4841              |
| Wheat        | -       | 2015-16 | -         | 1560      | 1812   | 1294  | 1527       | 2219    | 1631      | 1417  | 1520        | 1626     | 1420     | 1680    | 1608              |

**Table 2.9 (Contd.) Crop-wise District-wise Farm Harvest Prices of Principal Crops in India - Gujarat**

(Rs.per Quintal)

| Crop Name    | Variety | Year    | Season \$ | Kheda | Mahesana | Narmada | Navsari | Panch Mahals | Patan | Porbandar | Rajkot | Sabar Kantha | Surat | Surendrana gar | State Wtd Average |
|--------------|---------|---------|-----------|-------|----------|---------|---------|--------------|-------|-----------|--------|--------------|-------|----------------|-------------------|
| Bajra        | -       | 2015-16 | Kharif    | 1271  | 1176     | 1300    | -       | 1198         | 1196  | 1280      | -      | 1307         | -     | 1125           | 1261              |
|              |         |         | Summer    | -     | -        | -       | -       | -            | -     | -         | -      | -            | -     | -              | -                 |
| CasterSeed   | -       | 2015-16 | -         | 3851  | 3975     | 3800    | -       | 3558         | 4324  | 4255      | -      | 3630         | -     | 3689           | 3794              |
| Chilly       | Dry     | 2015-16 | -         | -     | -        | -       | -       | -            | -     | -         | 11079  | -            | -     | -              | 10237             |
| Cotton       | Desi    | 2015-16 | -         | -     | -        | -       | -       | -            | -     | -         | -      | -            | -     | 3150           | 3088              |
|              | Hybrid  | 2015-16 | -         | 3719  | 3435     | 3580    | -       | 3939         | 4135  | 4100      | 3964   | 4683         | -     | 4000           | 4078              |
| Gram         | -       | 2015-16 | -         | 2834  | -        | -       | -       | 3390         | 3275  | 3767      | 4077   | -            | -     | 3625           | 3451              |
| Ground Nut   | -       | 2015-16 | Kharif    | -     | 3599     | -       | -       | 2910         | -     | 3900      | 3786   | 3608         | 3550  | 4500           | 3681              |
|              |         |         | Rabi      | -     | -        | -       | -       | -            | -     | -         | -      | -            | 3532  | -              | -                 |
| Jowar        | -       | 2015-16 | -         | -     | 3146     | 1300    | -       | 1525         | -     | 1825      | -      | 1785         | -     | -              | 2031              |
| Maize        | -       | 2015-16 | -         | 1210  | -        | 1400    | -       | 1398         | -     | 750       | -      | 1342         | -     | -              | 1284              |
| Paddy        | -       | 2015-16 | -         | 1331  | 1548     | 1800    | 1377    | 1266         | -     | -         | -      | 1355         | 1389  | -              | 1437              |
| Potato       | -       | 2015-16 | -         | 1083  | 860      | -       | -       | -            | -     | -         | -      | -            | -     | -              | 1075              |
| Ragi         | -       | 2015-16 | -         | -     | -        | -       | -       | -            | -     | -         | -      | -            | -     | -              | 1400              |
| Rape/Mustard | -       | 2015-16 | -         | 3111  | 3014     | -       | -       | -            | 3199  | 7500      | -      | 2874         | -     | -              | 3622              |
| Sesamum      | -       | 2015-16 | -         | -     | -        | -       | -       | 7500         | 8589  | 11467     | 11445  | -            | -     | 6500           | 9202              |
| Sugarcane    | -       | 2015-16 | -         | -     | -        | -       | -       | -            | -     | -         | -      | -            | -     | -              | -                 |
| Tobacco      | -       | 2015-16 | -         | 4062  | -        | -       | -       | -            | -     | -         | -      | -            | -     | -              | 4611              |
| Tur Arhar    | -       | 2015-16 | -         | -     | -        | 3400    | -       | 48755        | -     | -         | -      | 3599         | 4462  | -              | 4841              |
| Wheat        | -       | 2015-16 | -         | 1521  | 1593     | 1700    | -       | 1486         | 1688  | 1550      | 1773   | 1723         | 1785  | 1425           | 1608              |



**Table 2.9 (Contd.) Crop-wise District-wise Farm Harvest Prices of Principal Crops in India - Gujarat**

(Rs.per Quintal)

| Crop Name    | Variety | Year    | Season \$ | Tapi  | The Dangs | Vadodara | Valsad | State Wtd Average |  |  |  |  |  |  |  |
|--------------|---------|---------|-----------|-------|-----------|----------|--------|-------------------|--|--|--|--|--|--|--|
| Bajra        | -       | 2015-16 | Kharif    | -     | -         | 1330     | -      | 1261              |  |  |  |  |  |  |  |
|              |         |         | Summer    | -     | -         | 1298     | -      | -                 |  |  |  |  |  |  |  |
| CasterSeed   | -       | 2015-16 | -         | -     | -         | 3731     | -      | 3794              |  |  |  |  |  |  |  |
| Chilly       | Dry     | 2015-16 | -         | -     | -         | -        | -      | 10237             |  |  |  |  |  |  |  |
| Cotton       | Desi    | 2015-16 | -         | -     | -         | -        | -      | 3088              |  |  |  |  |  |  |  |
|              | Hybrid  | 2015-16 | -         | -     | -         | 3898     | -      | 4078              |  |  |  |  |  |  |  |
| Gram         | -       | 2015-16 | -         | 2970  | -         | -        | -      | 3451              |  |  |  |  |  |  |  |
| Ground Nut   | -       | 2015-16 | Kharif    | 3758  | 3620      | -        | -      | 3681              |  |  |  |  |  |  |  |
|              |         |         | Rabi      | 3758  | -         | -        | -      | -                 |  |  |  |  |  |  |  |
| Jowar        | -       | 2015-16 | -         | 1602  | 1350      | 1766     | 2195   | 2031              |  |  |  |  |  |  |  |
| Maize        | -       | 2015-16 | -         | 1097  | -         | -        | -      | 1284              |  |  |  |  |  |  |  |
| Paddy        | -       | 2015-16 | -         | 1270  | 1252      | 1450     | 1421   | 1437              |  |  |  |  |  |  |  |
| Potato       | -       | 2015-16 | -         | -     | -         | -        | -      | 1075              |  |  |  |  |  |  |  |
| Ragi         | -       | 2015-16 | -         | -     | 1600      | -        | 1200   | 1400              |  |  |  |  |  |  |  |
| Rape/Mustard | -       | 2015-16 | -         | 3802  | -         | -        | -      | 3622              |  |  |  |  |  |  |  |
| Sesamum      | -       | 2015-16 | -         | 10127 | -         | -        | -      | 9202              |  |  |  |  |  |  |  |
| Sugarcane    | -       | 2015-16 | -         | -     | -         | -        | 215    | -                 |  |  |  |  |  |  |  |
| Tobacco      | -       | 2015-16 | -         | -     | -         | 4200     | -      | 4611              |  |  |  |  |  |  |  |
| Tur Arhar    | -       | 2015-16 | -         | 4868  | 3892      | 5164     | 8300   | 4841              |  |  |  |  |  |  |  |
| Wheat        | -       | 2015-16 | -         | 1475  | -         | 1621     | -      | 1608              |  |  |  |  |  |  |  |

**Table 2.10 Crop-wise District-wise Farm Harvest Prices of Principal Crops in India - Haryana**

(Rs.per Quintal)

| Crop Name  | Variety  | Year    | Season \$ | Ambala | Bhiwani | Faridabad | Fatehabad | Gurgaon | Hisar | Jhajjar | Jind | Kaithal | Karnal | Kurukshetra | State Wtd Average |
|------------|----------|---------|-----------|--------|---------|-----------|-----------|---------|-------|---------|------|---------|--------|-------------|-------------------|
| Bajra      | -        | 2015-16 | -         | 1350   | 1400    | 1300      | 1350      | 1300    | 1300  | 1300    | 1300 | 1300    | 1250   | -           | 1329              |
|            |          |         | Kharif    | -      | 1350    | 1400      | 1300      | 1350    | 1300  | 1300    | 1300 | 1300    | 1300   | 1250        | -                 |
| Chilly     | -        | 2015-16 | Kharif    | 4000   | -       | -         | 3500      | -       | 7100  | -       | 5100 | 4200    | 4300   | 5000        | 5984              |
| Cotton     | American | 2015-16 | Kharif    | -      | 5000    | -         | 4600      | 4100    | 5150  | 4500    | 4600 | 5300    | -      | -           | 5021              |
|            | Desi     | 2015-16 | Kharif    | -      | -       | -         | 5000      | -       | 5400  | -       | -    | -       | -      | -           | 5371              |
| Ground Nut | -        | 2015-16 | Kharif    | -      | 4700    | -         | 4200      | 4200    | 3620  | 6000    | -    | -       | 4200   | -           | 3851              |
| Jowar      | -        | 2015-16 | Kharif    | -      | 3000    | 4000      | -         | 4000    | 3000  | -       | -    | -       | -      | -           | 3107              |
| Maize      | -        | 2015-16 | Kharif    | 1600   | -       | -         | -         | -       | -     | -       | -    | -       | -      | -           | 1600              |
| Paddy      | -        | 2015-16 | Kharif    | 2800   | 3100    | 1850      | 2500      | 1500    | 1600  | 1450    | 2800 | 2600    | 1700   | 3000        | 1753              |

**Table 2.10 (Contd.) Crop-wise District-wise Farm Harvest Prices of Principal Crops in India - Haryana**

(Rs.per Quintal)

| Crop Name  | Variety  | Year    | Season \$ | Mahendragarh | Mewat | Palwal | Panchkula | Panipat | Rewari | Rohtak | Sirsa | Sonipat | Yamunanagar | State Wtd Average |  |
|------------|----------|---------|-----------|--------------|-------|--------|-----------|---------|--------|--------|-------|---------|-------------|-------------------|--|
| Bajra      | -        | 2015-16 | -         | 1350         | 1300  | 1300   | 1300      | -       | 1300   | 1350   | 1350  | 1600    | -           | 1329              |  |
|            |          |         | Kharif    | 1350         | 1300  | 1300   | 1300      | -       | 1300   | 1350   | 1350  | 1600    | -           | 1329              |  |
| Chilly     | -        | 2015-16 | Kharif    | 8000         | 4600  | -      | 4800      | 8300    | -      | -      | 8000  | 7000    | 5100        | 5984              |  |
| Cotton     | American | 2015-16 | Kharif    | 5200         | 4200  | 4100   | -         | -       | 5300   | 5200   | 5200  | 4700    | -           | 5021              |  |
|            | Desi     | 2015-16 | Kharif    | -            | -     | -      | -         | -       | -      | -      | 5500  | -       | -           | 5371              |  |
| Ground Nut | -        | 2015-16 | Kharif    | 4200         | 3600  | -      | 4100      | -       | 3700   | 4200   | 3600  | -       | 3650        | 3851              |  |
| Jowar      | -        | 2015-16 | Kharif    | -            | 3500  | 3000   | -         | -       | -      | 3000   | -     | 3000    | -           | 3107              |  |
| Maize      | -        | 2015-16 | Kharif    | -            | -     | -      | 1600      | -       | -      | 1600   | -     | -       | -           | 1600              |  |
| Paddy      | -        | 2015-16 | Kharif    | -            | 4500  | 2900   | 4200      | 3000    | 3500   | 3000   | 3000  | 2650    | 3500        | 1753              |  |

**Table 2.11 Crop-wise District-wise Farm Harvest Prices of Principal Crops in India - Himachal Pradesh**

(Rs.per Quintal)

| Crop Name    | Variety | Year    | Season \$ | Bilaspur | Chamba | Hamirpur | Kangra | Kinnaur | Kullu | Lahaul & Spiti | Mandi | Shimla | Sirmaur | Solan | State Wtd Average |
|--------------|---------|---------|-----------|----------|--------|----------|--------|---------|-------|----------------|-------|--------|---------|-------|-------------------|
| Barley       | -       | 2015-16 | -         | 2000     | 1545   | 2050     | 1550   | 3500    | 2100  | 2200           | 2133  | 1750   | 1373    | 1573  | 1967              |
| Chilly       | -       | 2015-16 | -         | 13000    | 20000  | 15000    | -      | -       | 16000 | -              | 11400 | 9000   | 7723    | 7856  | 12775             |
| Ginger       | -       | 2015-16 | -         | 10000    | -      | 7000     | -      | -       | -     | -              | 6000  | 6350   | 3565    | 5860  | 6396              |
| Gram         | -       | 2015-16 | -         | 11000    | 7500   | 6324     | 8000   | -       | 8600  | -              | -     | -      | 4283    | 5600  | 7226              |
| Ground Nut   | -       | 2015-16 | -         | -        | -      | -        | -      | -       | -     | -              | -     | -      | 7690    | 8180  | 7665              |
| Linseed      | -       | 2015-16 | -         | -        | 8000   | 8500     | 7200   | -       | -     | -              | 6120  | -      | -       | 4620  | 6907              |
| Maize        | -       | 2015-16 | -         | 1400     | 1363   | 1963     | 1600   | 3000    | 1800  | 1500           | 1553  | 1820   | 1553    | 1500  | 1713              |
| Paddy        | -       | 2015-16 | -         | 1800     | 2240   | 1817     | 2000   | -       | 2800  | -              | 2127  | 2453   | 1550    | 2530  | 2084              |
| Potato       | -       | 2015-16 | Kharif    | -        | 2110   | -        | 1500   | 3000    | 2800  | 3466           | 2022  | 2020   | 2400    | 1820  | 2262              |
|              |         |         | Rabi      | 2000     | 1566   | 1500     | -      | -       | 2100  | -              | 1683  | 2020   | 1593    | 1670  | 1702              |
| Rape/Mustard | -       | 2015-16 | -         | 2500     | 4828   | 8800     | 8000   | -       | 8100  | 3000           | 6764  | 5200   | 3653    | 5250  | 5522              |
| Sesamum      | -       | 2015-16 | -         | 16000    | -      | 11240    | 12000  | -       | -     | -              | 6550  | -      | 7720    | 10583 | 10809             |
| Soyabean     | -       | 2015-16 | -         | 5400     | -      | -        | 5000   | -       | 4600  | -              | 5968  | -      | 5700    | -     | 5334              |
| Turmeric     | -       | 2015-16 | -         | 8000     | -      | 14000    | -      | -       | -     | -              | 5543  | -      | 9100    | -     | 10404             |
| Wheat        | -       | 2015-16 | -         | 1500     | 1490   | 2000     | 1500   | 4000    | 1800  | 2000           | 1661  | 2000   | 1515    | 1650  | 1885              |

**Table 2.11 (Contd.) Crop-wise District-wise Farm Harvest Prices of Principal Crops in India - Himachal Pradesh**

(Rs.per Quintal)

| Crop Name    | Variety | Year    | Season \$ | Una   | State Wtd Average |  |  |  |  |  |  |  |  |  |  |
|--------------|---------|---------|-----------|-------|-------------------|--|--|--|--|--|--|--|--|--|--|
| Barley       | -       | 2015-16 | -         | 1833  | 1967              |  |  |  |  |  |  |  |  |  |  |
| Chilly       | -       | 2015-16 | -         | 15000 | 12775             |  |  |  |  |  |  |  |  |  |  |
| Ginger       | -       | 2015-16 | -         | 6000  | 6396              |  |  |  |  |  |  |  |  |  |  |
| Gram         | -       | 2015-16 | -         | 6500  | 7226              |  |  |  |  |  |  |  |  |  |  |
| Ground Nut   | -       | 2015-16 | -         | 7166  | 7665              |  |  |  |  |  |  |  |  |  |  |
| Linseed      | -       | 2015-16 | -         | 7000  | 6907              |  |  |  |  |  |  |  |  |  |  |
| Maize        | -       | 2015-16 | -         | 1503  | 1713              |  |  |  |  |  |  |  |  |  |  |
| Paddy        | -       | 2015-16 | -         | 1527  | 2084              |  |  |  |  |  |  |  |  |  |  |
| Potato       | -       | 2015-16 | Kharif    | 1483  | 2262              |  |  |  |  |  |  |  |  |  |  |
|              |         |         | Rabi      | 1187  | 1702              |  |  |  |  |  |  |  |  |  |  |
| Rape/Mustard | -       | 2015-16 | -         | 4650  | 5522              |  |  |  |  |  |  |  |  |  |  |
| Sesamum      | -       | 2015-16 | -         | 11570 | 10809             |  |  |  |  |  |  |  |  |  |  |
| Soyabean     | -       | 2015-16 | -         | -     | 5334              |  |  |  |  |  |  |  |  |  |  |
| Turmeric     | -       | 2015-16 | -         | 15375 | 10404             |  |  |  |  |  |  |  |  |  |  |
| Wheat        | -       | 2015-16 | -         | 1500  | 1885              |  |  |  |  |  |  |  |  |  |  |

**Table 2.12 Crop-wise District-wise Farm Harvest Prices of Principal Crops in India - Jammu & Kashmir**

(Rs.per Quintal)

| Crop Name    | Variety | Year    | Season \$ | Anantnag | Bandipora | Baramulla | Budgam | Doda | Ganderbal | Jammu | Kargil | Kathua | Kishtwar | Kulgam | State Wtd Average |
|--------------|---------|---------|-----------|----------|-----------|-----------|--------|------|-----------|-------|--------|--------|----------|--------|-------------------|
| Bajra        | -       | 2015-16 | -         | -        | -         | -         | -      | -    | -         | 1100  | -      | 1200   | -        | -      | 1157              |
| Barley       | -       | 2015-16 | -         | -        | -         | -         | -      | 1550 | -         | 1500  | -      | 1600   | 1500     | -      | 1555              |
| Chilly       | -       | 2015-16 | -         | 8500     | -         | 8000      | 8000   | -    | -         | -     | -      | 9000   | -        | 8000   | 8528              |
| Linseed      | -       | 2015-16 | -         | -        | -         | -         | -      | -    | -         | 6000  | -      | 6000   | -        | -      | 5555              |
| Maize        | -       | 2015-16 | -         | 1200     | 1300      | 1300      | 1300   | 1300 | 1300      | 1100  | -      | 1300   | 1250     | 1250   | 1264              |
| Paddy        | -       | 2015-16 | -         | 1400     | 1500      | 1500      | 1500   | 1800 | 1500      | 2400  | -      | 1600   | 1700     | 1400   | 1713              |
| Potato       | -       | 2015-16 | -         | 1500     | 1500      | 1400      | 1400   | -    | 1400      | 1200  | 1500   | 1400   | -        | 1400   | 1458              |
| Rape/Mustard | -       | 2015-16 | -         | 3800     | 3300      | 3300      | 2800   | 5000 | 2500      | 5200  | -      | 7500   | 5800     | 3800   | 3757              |
| Sesamum      | -       | 2015-16 | -         | -        | -         | -         | -      | -    | -         | -     | -      | 6300   | -        | -      | 6252              |
| Sugarcane    | -       | 2015-16 | -         | -        | -         | -         | -      | -    | -         | -     | -      | -      | -        | -      | 1450              |
| Wheat        | -       | 2015-16 | -         | -        | -         | -         | 2000   | 1500 | -         | 1500  | 1500   | 1500   | 1400     | -      | 1505              |

**Table 2.12 (Contd.) Crop-wise District-wise Farm Harvest Prices of Principal Crops in India - Jammu & Kashmir**

(Rs.per Quintal)

| Crop Name    | Variety | Year    | Season \$ | Kupwara | Leh  | Poonch | Pulwama | Rajauri | Rambon | Reasi | Samba | Shopian | Srinagar | Udhampur | State Wtd Average |
|--------------|---------|---------|-----------|---------|------|--------|---------|---------|--------|-------|-------|---------|----------|----------|-------------------|
| Bajra        | -       | 2015-16 | -         | -       | -    | -      | -       | 1400    | -      | 1400  | 1100  | -       | -        | 1100     | 1157              |
| Barley       | -       | 2015-16 | -         | -       | 1450 | -      | -       | 1450    | 1500   | 1500  | 1800  | -       | -        | 1500     | 1555              |
| Chilly       | -       | 2015-16 | -         | -       | -    | -      | 8500    | 9000    | -      | -     | -     | -       | 8000     | 8000     | 8528              |
| Linseed      | -       | 2015-16 | -         | -       | 4000 | -      | 4600    | 5800    | -      | -     | -     | -       | -        | -        | 5555              |
| Maize        | -       | 2015-16 | -         | 1500    | -    | 1250   | 1300    | 1300    | 1250   | 1300  | 1150  | 1300    | 1300     | 1250     | 1264              |
| Paddy        | -       | 2015-16 | -         | 1600    | -    | 1700   | 1500    | 1700    | 1700   | 1800  | 1700  | 1500    | 1500     | 1700     | 1713              |
| Potato       | -       | 2015-16 | -         | 1500    | 1700 | 1450   | 1400    | -       | -      | -     | -     | 1400    | 1500     | 1400     | 1458              |
| Rape/Mustard | -       | 2015-16 | -         | -       | 3500 | 5800   | 3500    | 5800    | 4800   | 3000  | 5000  | 3300    | 2500     | 5000     | 3757              |
| Sesamum      | -       | 2015-16 | -         | -       | 6200 | -      | -       | 6300    | -      | 6300  | 6200  | -       | -        | 6500     | 6252              |
| Sugarcane    | -       | 2015-16 | -         | -       | -    | -      | -       | -       | -      | -     | 1450  | -       | -        | -        | 1450              |
| Wheat        | -       | 2015-16 | -         | -       | 1500 | 1500   | 2000    | 1500    | 1500   | 1450  | 1500  | -       | -        | 1550     | 1505              |

**Table 2.13 Crop-wise District-wise Farm Harvest Prices of Principal Crops in India - Jharkhand**

(Rs.per Quintal)

| Crop Name    | Variety | Year    | Season \$ | Chatra | Deoghar | Dhanbad | Dumka | East Singhbhum | Garhwa | Giridih | Godda | Gumla | Hazaribagh | Jamtara | State Wtd Average |
|--------------|---------|---------|-----------|--------|---------|---------|-------|----------------|--------|---------|-------|-------|------------|---------|-------------------|
| Barley       | -       | 2015-16 | Rabi      | -      | 1300    | -       | -     | -              | 1333   | -       | 1522  | -     | -          | -       | 1486              |
| Ginger       | -       | 2015-16 | Rabi      | -      | -       | -       | -     | -              | -      | 12554   | -     | -     | -          | -       | 8759              |
| Gram         | -       | 2015-16 | Rabi      | 5095   | 5200    | -       | 7945  | 4455           | 4061   | 4554    | 4161  | 3433  | 4539       | 6000    | 5010              |
| Maize        | -       | 2015-16 | Rabi      | -      | -       | -       | -     | -              | -      | -       | -     | -     | -          | -       | 1257              |
| Potato       | -       | 2015-16 | Rabi      | 1237   | 1000    | 1340    | -     | 1033           | -      | 1152    | 989   | 1258  | -          | 944     | 1211              |
| Rape/Mustard | -       | 2015-16 | Rabi      | 4585   | 3500    | -       | 2863  | 3800           | -      | 3838    | 2917  | 7378  | 6247       | 4800    | 4326              |
| Tur Arhar    | -       | 2015-16 | Rabi      | 5191   | 10000   | -       | 9958  | 5200           | -      | 3379    | 4278  | 3640  | 5917       | -       | 6816              |
| Turmeric     | -       | 2015-16 | Rabi      | -      | 1000    | -       | -     | -              | -      | -       | -     | -     | -          | -       | 1000              |
| Wheat        | -       | 2015-16 | Rabi      | 1586   | 1400    | 1627    | 1171  | 1944           | 1507   | 1429    | 1844  | 1860  | 1653       | 1922    | 1631              |



**Table 2.13 (Contd.) Crop-wise District-wise Farm Harvest Prices of Principal Crops in India - Jharkhand**

(Rs.per Quintal)

| Crop Name    | Variety | Year    | Season \$ | Khunti | Koderma | Latehar | Lohardaga | Pakur | Palamu | Ramgarh | Ranchi | Sahibganj | Seraikela | Simdega | State Wtd Average |
|--------------|---------|---------|-----------|--------|---------|---------|-----------|-------|--------|---------|--------|-----------|-----------|---------|-------------------|
| Barley       | -       | 2015-16 | Rabi      | -      | -       | -       | -         | -     | -      | -       | -      | 1830      | -         | -       | 1486              |
| Ginger       | -       | 2015-16 | Rabi      | -      | -       | -       | 8000      | -     | -      | 3350    | -      | 1130      | -         | -       | 8759              |
| Gram         | -       | 2015-16 | Rabi      | 6990   | 5907    | 4240    | 6000      | 4644  | 5913   | 6000    | 2990   | 6010      | 4200      | 4544    | 5010              |
| Maize        | -       | 2015-16 | Rabi      | -      | -       | -       | -         | -     | 1265   | 1332    | -      | 1210      | -         | -       | 1257              |
| Potato       | -       | 2015-16 | Rabi      | 1330   | -       | -       | 1400      | -     | -      | 1175    | 1131   | 1275      | 1583      | 1311    | 1211              |
| Rape/Mustard | -       | 2015-16 | Rabi      | -      | 4435    | -       | 4000      | 6454  | -      | 2900    | 2695   | 3820      | 6100      | 4500    | 4326              |
| Tur Arhar    | -       | 2015-16 | Rabi      | 6920   | 10010   | 5192    | 4500      | 6693  | 8606   | 8000    | 7151   | 7390      | 10267     | 5889    | 6816              |
| Turmeric     | -       | 2015-16 | Rabi      | -      | -       | -       | -         | -     | -      | -       | -      | -         | -         | -       | 1000              |
| Wheat        | -       | 2015-16 | Rabi      | 1658   | 1855    | 1534    | 1600      | 1939  | 1635   | 1640    | 1674   | 1615      | 1717      | 1544    | 1631              |

**Table 2.13 (Contd.) Crop-wise District-wise Farm Harvest Prices of Principal Crops in India - Jharkhand**

(Rs.per Quintal)

| Crop Name    | Variety | Year    | Season \$ | West Singhbhum | State Wtd Average |  |  |  |  |  |  |  |  |  |  |
|--------------|---------|---------|-----------|----------------|-------------------|--|--|--|--|--|--|--|--|--|--|
| Barley       | -       | 2015-16 | Rabi      | -              | 1486              |  |  |  |  |  |  |  |  |  |  |
| Ginger       | -       | 2015-16 | Rabi      | -              | 8759              |  |  |  |  |  |  |  |  |  |  |
| Gram         | -       | 2015-16 | Rabi      | 3202           | 5010              |  |  |  |  |  |  |  |  |  |  |
| Maize        | -       | 2015-16 | Rabi      | -              | 1257              |  |  |  |  |  |  |  |  |  |  |
| Potato       | -       | 2015-16 | Rabi      | -              | 1211              |  |  |  |  |  |  |  |  |  |  |
| Rape/Mustard | -       | 2015-16 | Rabi      | 3040           | 4326              |  |  |  |  |  |  |  |  |  |  |
| Tur Arhar    | -       | 2015-16 | Rabi      | 8129           | 6816              |  |  |  |  |  |  |  |  |  |  |
| Turmeric     | -       | 2015-16 | Rabi      | -              | 1000              |  |  |  |  |  |  |  |  |  |  |
| Wheat        | -       | 2015-16 | Rabi      | 1367           | 1631              |  |  |  |  |  |  |  |  |  |  |

**Table 2.14 Crop-wise District-wise Farm Harvest Prices of Principal Crops in India - Karnataka**

(Rs.per Quintal)

| Crop Name  | Variety | Year    | Season \$ | Bagalkot | Bangalore Rural | Bangalore Urban | Belgaum | Bellary | Bidar | Bijapur | Chamrajnagar | Chickaballapura | Chickmagalur | Chitradurga | State Wtd Average |       |
|------------|---------|---------|-----------|----------|-----------------|-----------------|---------|---------|-------|---------|--------------|-----------------|--------------|-------------|-------------------|-------|
| Areca nut  | -       | 2015-16 | Kharif    | -        | -               | -               | -       | -       | -     | -       | -            | -               | -            | -           | 23899             |       |
|            |         |         | Summer    | -        | -               | -               | -       | -       | -     | -       | -            | -               | -            | 27989       | 26281             |       |
| Bajra      | -       | 2015-16 | Kharif    | -        | -               | -               | -       | 1473    | 1425  | 1006    | 1438         | 1394            | -            | -           | 1339              |       |
|            |         |         | Summer    | -        | -               | -               | -       | -       | -     | -       | -            | -               | -            | -           | -                 | 1678  |
| Cashewnut  | -       | 2015-16 | Summer    | -        | -               | -               | -       | -       | -     | -       | -            | 8619            | -            | -           | 9075              |       |
| CasterSeed | -       | 2015-16 | Kharif    | -        | -               | -               | -       | -       | -     | -       | -            | -               | -            | -           | 3285              |       |
| Chilly     | Dry     | 2015-16 | Kharif    | -        | -               | -               | -       | 11759   | -     | -       | -            | -               | -            | -           | 7653              |       |
| Coconut    | -       | 2015-16 | Kharif    | -        | -               | -               | -       | -       | -     | -       | 15894        | -               | -            | -           | 10998             |       |
|            |         |         | Rabi      | -        | -               | -               | -       | -       | -     | -       | -            | -               | -            | -           | 7005              |       |
|            |         |         | Summer    | -        | -               | -               | -       | -       | -     | -       | -            | 15894           | -            | -           | 9771              | 10049 |
| Cotton     | -       | 2015-16 | Kharif    | -        | -               | -               | 4350    | 4266    | -     | -       | 3996         | -               | -            | 4778        | 4415              |       |
|            |         |         | Rabi      | -        | -               | -               | -       | -       | -     | -       | -            | -               | -            | -           | 4216              |       |
|            |         |         | Summer    | -        | -               | -               | -       | 4266    | -     | -       | -            | -               | -            | -           | -                 | 4266  |
| Ginger     | -       | 2015-16 | Kharif    | -        | -               | -               | -       | -       | -     | -       | -            | -               | -            | 1048        |                   |       |
| Gram       | -       | 2015-16 | Kharif    | -        | -               | -               | -       | -       | -     | 3500    | 2209         | 2289            | -            | -           | 2756              |       |
|            |         |         | Rabi      | -        | -               | -               | -       | -       | -     | -       | -            | -               | -            | -           | -                 | 4530  |
| Ground Nut | -       | 2015-16 | Kharif    | -        | -               | -               | 4354    | 4505    | -     | 4339    | 3892         | 3734            | 3817         | 4108        | 4212              |       |
|            |         |         | Rabi      | -        | -               | -               | 4521    | -       | -     | -       | -            | -               | -            | -           | -                 | 4121  |
|            |         |         | Summer    | 5063     | -               | -               | 3593    | 4936    | -     | 5379    | -            | -               | -            | -           | 4820              | 4494  |
| Jowar      | -       | 2015-16 | Rabi      | 1367     | -               | -               | -       | -       | -     | -       | -            | -               | -            | -           | 1367              |       |
|            |         |         | Summer    | -        | -               | -               | -       | 1483    | -     | -       | -            | -               | -            | -           | 1394              |       |
|            | HYV     | 2015-16 | Kharif    | -        | -               | -               | 2292    | 1371    | 1296  | -       | 2138         | -               | -            | -           | 1662              |       |
|            |         |         | Rabi      | -        | -               | -               | -       | -       | -     | -       | -            | -               | -            | -           | 1257              |       |
|            | Local   | 2015-16 | Kharif    | -        | -               | -               | -       | -       | 1296  | -       | 2075         | -               | 1900         | -           | 1918              |       |
| Linseed    | -       | 2015-16 | Rabi      | -        | -               | -               | -       | -       | -     | 8500    | -            | -               | -            | 8500        |                   |       |
| Maize      | -       | 2015-16 | Kharif    | 1435     | 1530            | -               | 1402    | 1410    | -     | 1479    | 1420         | 1399            | 1396         | 1448        | 1378              |       |
|            |         |         | Rabi      | -        | 1490            | -               | -       | 1345    | 1474  | 1383    | -            | -               | -            | -           | 1439              | 1391  |
|            | HB      | 2015-16 | Summer    | -        | 1500            | -               | 1546    | 1514    | -     | -       | -            | -               | -            | -           | 1460              |       |
| Paddy      | -       | 2015-16 | Rabi      | -        | -               | -               | -       | -       | -     | -       | -            | -               | -            | -           | 1530              |       |
|            |         |         | Summer    | -        | -               | -               | -       | 1476    | -     | -       | -            | -               | 1705         | -           | 1743              |       |
|            | Local   | 2015-16 | Kharif    | -        | -               | -               | -       | -       | -     | -       | -            | -               | 1310         | -           | 1592              |       |
| Potato     | -       | 2015-16 | Kharif    | -        | -               | -               | -       | -       | -     | -       | -            | -               | 1075         | -           | 952               |       |
|            |         |         | Rabi      | -        | -               | -               | -       | -       | -     | -       | -            | -               | -            | -           | 1714              |       |
|            |         |         | Summer    | -        | -               | -               | -       | -       | -     | -       | -            | -               | -            | -           | 1151              |       |
| Ragi       | HYV     | 2015-16 | Kharif    | -        | 1441            | 2013            | -       | 1375    | -     | -       | 1749         | 1620            | 1397         | 1411        | 1606              |       |
|            |         |         | Rabi      | -        | -               | -               | -       | -       | -     | -       | -            | -               | -            | -           | -                 | 1607  |

**Table 2.14 (Contd.) Crop-wise District-wise Farm Harvest Prices of Principal Crops in India - Karnataka**

(Rs.per Quintal)

| Crop Name  | Variety | Year    | Season \$ | D. Kannada | Davangere | Dharwad | Gadag | Gulbarga | Hassan | Haveri | Kodagu | Kolar | Koppal | Mandya | State Wtd Average |
|------------|---------|---------|-----------|------------|-----------|---------|-------|----------|--------|--------|--------|-------|--------|--------|-------------------|
| Areca nut  | -       | 2015-16 | Kharif    | -          | -         | -       | -     | -        | -      | -      | -      | -     | -      | -      | 23899             |
|            |         |         | Summer    | 29725      | 27095     | -       | -     | -        | -      | -      | 25750  | -     | -      | -      | 26281             |
| Bajra      | -       | 2015-16 | Kharif    | -          | -         | -       | 1324  | -        | -      | -      | -      | -     | -      | 1392   | 1339              |
|            |         |         | Summer    | -          | -         | -       | -     | -        | -      | -      | -      | -     | 1678   | -      | 1678              |
| Cashewnut  | -       | 2015-16 | Summer    | 5745       | -         | -       | -     | -        | -      | -      | 11450  | -     | -      | -      | 9075              |
| CasterSeed | -       | 2015-16 | Kharif    | -          | -         | -       | -     | -        | -      | -      | -      | -     | -      | -      | 3285              |
| Chilly     | Dry     | 2015-16 | Kharif    | -          | -         | 6000    | 6063  | 8170     | -      | 8823   | -      | -     | 5800   | -      | 7653              |
| Coconut    | -       | 2015-16 | Kharif    | -          | -         | -       | -     | -        | -      | -      | -      | -     | -      | -      | 10998             |
|            |         |         | Rabi      | -          | -         | -       | -     | -        | -      | -      | -      | -     | -      | -      | 7005              |
|            |         |         | Summer    | 15125      | 7968      | -       | -     | -        | 8244   | -      | -      | -     | -      | -      | 10049             |
| Cotton     | -       | 2015-16 | Kharif    | -          | -         | 4856    | 4178  | -        | -      | 4773   | -      | -     | -      | -      | 4415              |
|            |         |         | Rabi      | -          | -         | 4594    | 4196  | -        | -      | 4294   | -      | -     | 3780   | -      | 4216              |
|            |         |         | Summer    | -          | -         | -       | -     | -        | -      | -      | -      | -     | -      | -      | 4266              |
| Ginger     | -       | 2015-16 | Kharif    | -          | -         | -       | -     | -        | 1048   | -      | -      | -     | -      | 1048   |                   |
| Gram       | -       | 2015-16 | Kharif    | -          | -         | -       | 4368  | -        | -      | -      | -      | -     | 1923   | 3270   | 2756              |
|            |         |         | Rabi      | -          | -         | -       | -     | -        | -      | -      | -      | -     | 4530   | -      | 4530              |
| Ground Nut | -       | 2015-16 | Kharif    | -          | 4815      | 4004    | 4565  | 4490     | -      | 4092   | -      | 3716  | -      | 4537   | 4212              |
|            |         |         | Rabi      | -          | -         | -       | 4502  | -        | -      | -      | -      | -     | -      | -      | 4121              |
|            |         |         | Summer    | -          | -         | -       | 4719  | -        | -      | 3892   | -      | -     | -      | -      | 4494              |
| Jowar      | -       | 2015-16 | Rabi      | -          | -         | -       | -     | -        | -      | -      | -      | -     | -      | -      | 1367              |
|            |         |         | Summer    | -          | -         | -       | -     | -        | -      | -      | -      | -     | 1305   | -      | 1394              |
|            | HYV     | 2015-16 | Kharif    | -          | 1384      | 1520    | -     | 2601     | -      | 1439   | -      | -     | 1193   | -      | 1662              |
|            |         |         | Rabi      | -          | -         | -       | -     | -        | -      | -      | -      | -     | 1257   | -      | 1257              |
|            | Local   | 2015-16 | Kharif    | -          | -         | -       | -     | 2399     | -      | -      | -      | -     | -      | -      | 1918              |
| Linseed    | -       | 2015-16 | Rabi      | -          | -         | -       | -     | -        | -      | -      | -      | -     | -      | 8500   |                   |
| Maize      | -       | 2015-16 | Kharif    | -          | 1342      | 1340    | 1287  | 1365     | 1336   | 1405   | 1188   | -     | 1320   | 1339   | 1378              |
|            |         |         | Rabi      | -          | 1383      | 1396    | 1337  | 1425     | 1520   | 1348   | -      | -     | 1339   | -      | 1391              |
|            | HB      | 2015-16 | Summer    | -          | -         | -       | 1335  | -        | -      | 1423   | -      | -     | 1400   | -      | 1460              |
| Paddy      | -       | 2015-16 | Rabi      | 1819       | -         | -       | -     | -        | -      | -      | -      | -     | -      | -      | 1530              |
|            |         |         | Summer    | 1794       | -         | -       | -     | -        | 1411   | 1488   | -      | 1779  | 2560   | 1716   | 1743              |
|            | Local   | 2015-16 | Kharif    | 1606       | -         | -       | -     | -        | 1623   | -      | 1328   | -     | -      | -      | 1592              |
| Potato     | -       | 2015-16 | Kharif    | -          | -         | -       | -     | 906      | 874    | -      | -      | -     | -      | -      | 952               |
|            |         |         | Rabi      | -          | -         | -       | -     | -        | -      | -      | -      | -     | 1714   | -      | 1714              |
|            |         |         | Summer    | -          | -         | -       | -     | -        | -      | -      | -      | -     | 1151   | -      | 1151              |
| Ragi       | HYV     | 2015-16 | Kharif    | -          | 1603      | -       | -     | -        | 1451   | -      | -      | 1731  | -      | 1693   | 1606              |
|            |         |         | Rabi      | -          | -         | -       | -     | -        | 1478   | -      | -      | -     | -      | 1676   | 1607              |

**Table 2.14 (Contd.) Crop-wise District-wise Farm Harvest Prices of Principal Crops in India - Karnataka**

(Rs.per Quintal)

| Crop Name  | Variety | Year    | Season \$ | Mysore | Raichur | Ramanagara | Shimoga | Tumkur | U.Kannada | Udupi | State Wtd Average |  |  |  |  |
|------------|---------|---------|-----------|--------|---------|------------|---------|--------|-----------|-------|-------------------|--|--|--|--|
| Areca nut  | -       | 2015-16 | Kharif    | -      | -       | -          | -       | 24568  | 23229     | -     | 23899             |  |  |  |  |
|            |         |         | Summer    | -      | -       | -          | 23388   | 22202  | -         | 27817 | 26281             |  |  |  |  |
| Bajra      | -       | 2015-16 | Kharif    | -      | 1274    | -          | -       | -      | -         | -     | 1339              |  |  |  |  |
|            |         |         | Summer    | -      | -       | -          | -       | -      | -         | -     | 1678              |  |  |  |  |
| Cashewnut  | -       | 2015-16 | Summer    | -      | -       | -          | -       | -      | -         | 10484 | 9075              |  |  |  |  |
| CasterSeed | -       | 2015-16 | Kharif    | 3220   | -       | 3349       | -       | -      | -         | -     | 3285              |  |  |  |  |
| Chilly     | Dry     | 2015-16 | Kharif    | -      | -       | -          | -       | 6953   | -         | -     | 7653              |  |  |  |  |
| Coconut    | -       | 2015-16 | Kharif    | -      | -       | 7034       | -       | 10470  | 10593     | -     | 10998             |  |  |  |  |
|            |         |         | Rabi      | -      | -       | 7005       | -       | -      | -         | -     | 7005              |  |  |  |  |
|            |         |         | Summer    | 13453  | -       | 4035       | -       | 7469   | -         | 8485  | 10049             |  |  |  |  |
| Cotton     | -       | 2015-16 | Kharif    | 4654   | -       | 3884       | -       | -      | -         | -     | 4415              |  |  |  |  |
|            |         |         | Rabi      | -      | -       | -          | -       | -      | -         | -     | 4216              |  |  |  |  |
|            |         |         | Summer    | -      | -       | -          | -       | -      | -         | -     | 4266              |  |  |  |  |
| Ginger     | -       | 2015-16 | Kharif    | -      | -       | -          | -       | -      | -         | 1048  |                   |  |  |  |  |
| Gram       | -       | 2015-16 | Kharif    | 2242   | -       | 2248       | -       | -      | -         | -     | 2756              |  |  |  |  |
|            |         |         | Rabi      | -      | -       | -          | -       | -      | -         | -     | 4530              |  |  |  |  |
| Ground Nut | -       | 2015-16 | Kharif    | -      | -       | 4009       | -       | 3934   | -         | -     | 4212              |  |  |  |  |
|            |         |         | Rabi      | -      | -       | -          | -       | 4925   | -         | -     | 4121              |  |  |  |  |
|            |         |         | Summer    | -      | 4925    | -          | -       | 3031   | -         | -     | 4494              |  |  |  |  |
| Jowar      | -       | 2015-16 | Rabi      | -      | -       | -          | -       | -      | -         | -     | 1367              |  |  |  |  |
|            |         |         | Summer    | -      | -       | -          | -       | -      | -         | -     | 1394              |  |  |  |  |
|            | HYV     | 2015-16 | Kharif    | 1389   | -       | -          | -       | -      | -         | -     | 1662              |  |  |  |  |
|            |         |         | Rabi      | -      | -       | -          | -       | -      | -         | -     | 1257              |  |  |  |  |
|            | Local   | 2015-16 | Kharif    | -      | -       | -          | -       | -      | -         | -     | 1918              |  |  |  |  |
| Linseed    | -       | 2015-16 | Rabi      | -      | -       | -          | -       | -      | -         | 8500  |                   |  |  |  |  |
| Maize      | -       | 2015-16 | Kharif    | 1242   | -       | -          | 1381    | 1423   | 1433      | -     | 1378              |  |  |  |  |
|            |         |         | Rabi      | 1111   | -       | -          | -       | 1484   | -         | -     | 1391              |  |  |  |  |
|            | HB      | 2015-16 | Summer    | -      | -       | -          | -       | 1504   | -         | -     | 1460              |  |  |  |  |
| Rabi       |         |         | -         | -      | 1450    | -          | 1490    | -      | 1604      | 1530  |                   |  |  |  |  |
| Paddy      | -       | 2015-16 | Summer    | 1675   | 2445    | 1517       | -       | 1397   | -         | -     | 1743              |  |  |  |  |
|            |         |         | Kharif    | -      | 2076    | -          | -       | 1610   | -         | -     | 1592              |  |  |  |  |
|            | Local   | 2015-16 | Kharif    | -      | -       | -          | -       | -      | -         | -     | 952               |  |  |  |  |
| Potato     | -       | 2015-16 | Kharif    | -      | -       | -          | -       | -      | -         | -     | 952               |  |  |  |  |
|            |         |         | Rabi      | -      | -       | -          | -       | -      | -         | -     | 1714              |  |  |  |  |
|            |         |         | Summer    | -      | -       | -          | -       | -      | -         | -     | 1151              |  |  |  |  |
| Ragi       | HYV     | 2015-16 | Kharif    | -      | -       | 1763       | -       | 1629   | -         | -     | 1606              |  |  |  |  |
|            |         |         | Rabi      | 1392   | -       | 1881       | -       | -      | -         | -     | 1607              |  |  |  |  |

**Table 2.14 (Contd.) Crop-wise District-wise Farm Harvest Prices of Principal Crops in India - Karnataka**

(Rs.per Quintal)

| Crop Name | Variety | Year    | Season \$ | Bagalkot | Bangalore Rural | Bangalore Urban | Belgaum | Bellary | Bidar | Bijapur | Chamrajnagar | Chickaballapura | Chickmagalur | Chitradurga | State Wtd Average |      |
|-----------|---------|---------|-----------|----------|-----------------|-----------------|---------|---------|-------|---------|--------------|-----------------|--------------|-------------|-------------------|------|
| Ragi      | HYV     | 2015-16 | Summer    | -        | -               | -               | -       | -       | -     | -       | -            | -               | -            | 1433        | 1639              |      |
| Sesamum   | -       | 2015-16 | Kharif    | -        | -               | -               | -       | 5133    | 6711  | -       | -            | -               | 5308         | 5595        | 5760              |      |
|           |         |         | Rabi      | -        | -               | -               | -       | -       | -     | -       | -            | -               | -            | -           | 4550              |      |
|           |         |         | Summer    | -        | -               | -               | -       | -       | -     | -       | -            | -               | -            | -           | -                 | 2300 |
| Sugarcane | -       | 2015-16 | Kharif    | -        | -               | -               | -       | -       | -     | -       | -            | -               | -            | -           | 2600              |      |
|           |         |         | Summer    | -        | -               | -               | -       | -       | -     | -       | -            | -               | -            | -           | -                 | 1728 |
| Sunflower | -       | 2015-16 | Kharif    | 3234     | -               | -               | 3213    | 3356    | 3381  | 3809    | 3671         | -               | 2905         | 3596        | 3401              |      |
|           |         |         | Rabi      | 3811     | -               | -               | 3013    | 3142    | -     | 3694    | -            | -               | -            | 3416        | 3302              |      |
|           |         |         | Summer    | -        | -               | -               | -       | -       | -     | -       | -            | -               | -            | -           | -                 | 3501 |
| Tobacco   | -       | 2015-16 | Summer    | -        | -               | -               | -       | -       | -     | -       | -            | -               | -            | -           | 10172             |      |
| Tur Arhar | -       | 2015-16 | Kharif    | -        | -               | -               | -       | 6048    | 5636  | 8483    | -            | 4420            | -            | 7392        | 6134              |      |
| Turmeric  | -       | 2015-16 | Kharif    | -        | -               | -               | -       | -       | -     | -       | 8056         | -               | -            | -           | 8056              |      |
|           |         |         | Summer    | -        | -               | -               | -       | -       | -     | -       | -            | 8056            | -            | -           | -                 | 8056 |
| Wheat     | -       | 2015-16 | Rabi      | 2144     | -               | -               | 2041    | -       | -     | -       | 2706         | -               | -            | -           | 1465              | 1930 |
|           |         |         | Summer    | -        | -               | -               | -       | -       | -     | -       | -            | -               | -            | -           | -                 | -    |

**Table 2.14 (Contd.) Crop-wise District-wise Farm Harvest Prices of Principal Crops in India - Karnataka**

(Rs.per Quintal)

| Crop Name | Variety | Year    | Season \$ | D. Kannada | Davangere | Dharwad | Gadag | Gulbarga | Hassan | Haveri | Kodagu | Kolar | Koppal | Mandya | State Wtd Average |      |
|-----------|---------|---------|-----------|------------|-----------|---------|-------|----------|--------|--------|--------|-------|--------|--------|-------------------|------|
| Ragi      | HYV     | 2015-16 | Summer    | -          | -         | -       | -     | -        | -      | -      | -      | -     | -      | -      | 1639              |      |
| Sesamum   | -       | 2015-16 | Kharif    | -          | -         | -       | 5072  | 5413     | 7347   | -      | -      | -     | 4785   | -      | 5760              |      |
|           |         |         | Rabi      | -          | -         | -       | -     | -        | -      | -      | -      | -     | -      | -      | -                 | 4550 |
|           |         |         | Summer    | -          | -         | -       | -     | -        | -      | -      | -      | -     | -      | -      | -                 | 2300 |
| Sugarcane | -       | 2015-16 | Kharif    | -          | -         | -       | -     | -        | -      | -      | -      | -     | -      | -      | 2600              |      |
|           |         |         | Summer    | -          | 1586      | -       | -     | -        | 1869   | -      | -      | -     | -      | -      | -                 | 1728 |
| Sunflower | -       | 2015-16 | Kharif    | -          | 2975      | -       | 3576  | 3266     | 3283   | 3376   | -      | -     | 3406   | -      | 3401              |      |
|           |         |         | Rabi      | -          | -         | 3075    | 3518  | 3338     | -      | 3441   | -      | -     | 3421   | -      | 3302              |      |
|           |         |         | Summer    | -          | -         | -       | 3501  | -        | -      | -      | -      | -     | -      | -      | -                 | 3501 |
| Tobacco   | -       | 2015-16 | Summer    | -          | -         | -       | -     | -        | -      | -      | -      | -     | -      | -      | 10172             |      |
| Tur Arhar | -       | 2015-16 | Kharif    | -          | 4009      | -       | 7510  | 9380     | -      | 6503   | -      | -     | -      | -      | 6134              |      |
| Turmeric  | -       | 2015-16 | Kharif    | -          | -         | -       | -     | -        | -      | -      | -      | -     | -      | -      | 8056              |      |
|           |         |         | Summer    | -          | -         | -       | -     | -        | -      | -      | -      | -     | -      | -      | -                 | 8056 |
| Wheat     | -       | 2015-16 | Rabi      | -          | -         | 1647    | 1775  | 2458     | -      | 1637   | -      | -     | 1609   | -      | 1930              |      |
|           |         |         | Summer    | -          | -         | -       | -     | -        | -      | -      | -      | -     | -      | 1493   | -                 | 1493 |

**Table 2.14 (Contd.) Crop-wise District-wise Farm Harvest Prices of Principal Crops in India - Karnataka**

(Rs.per Quintal)

| Crop Name | Variety | Year    | Season \$ | Mysore | Raichur | Ramanagara | Shimoga | Tumkur | U.Kannada | Udupi | State Wtd Average |      |  |  |  |  |
|-----------|---------|---------|-----------|--------|---------|------------|---------|--------|-----------|-------|-------------------|------|--|--|--|--|
| Ragi      | HYV     | 2015-16 | Summer    | -      | -       | 1893       | -       | 1591   | -         | -     | 1639              |      |  |  |  |  |
| Sesamum   | -       | 2015-16 | Kharif    | 6974   | -       | 5260       | -       | -      | -         | -     | 5760              |      |  |  |  |  |
|           |         |         | Rabi      | -      | -       | 4550       | -       | -      | -         | -     | -                 | 4550 |  |  |  |  |
|           |         |         | Summer    | -      | -       | 2300       | -       | -      | -         | -     | -                 | 2300 |  |  |  |  |
| Sugarcane | -       | 2015-16 | Kharif    | -      | -       | -          | -       | -      | 2600      | -     | 2600              |      |  |  |  |  |
|           |         |         | Summer    | -      | -       | -          | -       | -      | -         | -     | -                 | 1728 |  |  |  |  |
| Sunflower | -       | 2015-16 | Kharif    | -      | 3532    | -          | -       | 3373   | -         | -     | 3401              |      |  |  |  |  |
|           |         |         | Rabi      | -      | 2501    | -          | -       | -      | -         | -     | 3302              |      |  |  |  |  |
|           |         |         | Summer    | -      | -       | -          | -       | -      | -         | -     | -                 | 3501 |  |  |  |  |
| Tobacco   | -       | 2015-16 | Summer    | 10172  | -       | -          | -       | -      | -         | -     | 10172             |      |  |  |  |  |
| Tur Arhar | -       | 2015-16 | Kharif    | 3228   | -       | 4248       | -       | 4295   | 8585      | -     | 6134              |      |  |  |  |  |
| Turmeric  | -       | 2015-16 | Kharif    | -      | -       | -          | -       | -      | -         | -     | 8056              |      |  |  |  |  |
|           |         |         | Summer    | -      | -       | -          | -       | -      | -         | -     | -                 | 8056 |  |  |  |  |
| Wheat     | -       | 2015-16 | Rabi      | -      | 1815    | -          | -       | -      | -         | -     | 1930              |      |  |  |  |  |
|           |         |         | Summer    | -      | -       | -          | -       | -      | -         | -     | -                 | 1493 |  |  |  |  |



**Table 2.15 Crop-wise District-wise Farm Harvest Prices of Principal Crops in India - Kerala**

(Rs.per Quintal)

| Crop Name | Variety | Year    | Season \$ | Alappuzha | Ernakulam | Idukki | Kannur | Kasargod | Kollam | Kottayam | Kozhikode | Malappuram | Palakkad | Pathanamthitta | State Wtd Average |
|-----------|---------|---------|-----------|-----------|-----------|--------|--------|----------|--------|----------|-----------|------------|----------|----------------|-------------------|
| Banana    | -       | 2015-16 | -         | 3867      | 3108      | 2788   | 3110   | 3067     | 4016   | 3453     | 3168      | 2851       | 2773     | 3792           | 2939              |
| Ginger    | Dry     | 2015-16 | -         | -         | -         | -      | -      | 14210    | -      | -        | 13393     | -          | 15295    | -              | 14452             |
| Paddy     | -       | 2015-16 | -         | 1993      | 1719      | 1894   | 1694   | 1687     | 2027   | 2101     | 2083      | 1441       | 1839     | 2142           | 1835              |
| Pepper    | -       | 2015-16 | -         | -         | 61634     | 64149  | 62740  | 62228    | 61718  | 63904    | 62347     | 62951      | 62951    | 64466          | -                 |
| Tapioca   | -       | 2015-16 | -         | 1119      | 941       | 1138   | 1187   | 1317     | 1200   | 1156     | 1083      | 913        | 1065     | 1248           | 1172              |

**Table 2.15 (Contd.) Crop-wise District-wise Farm Harvest Prices of Principal Crops in India - Kerala**

(Rs.per Quintal)

| Crop Name | Variety | Year    | Season \$ | Thiruvananthapuram | Trichur | Wayanad | State Wtd Average |  |  |  |  |  |  |  |  |
|-----------|---------|---------|-----------|--------------------|---------|---------|-------------------|--|--|--|--|--|--|--|--|
| Banana    | -       | 2015-16 | -         | 3607               | 3205    | 2374    | 2939              |  |  |  |  |  |  |  |  |
| Ginger    | Dry     | 2015-16 | -         | -                  | -       | 14000   | 14452             |  |  |  |  |  |  |  |  |
| Paddy     | -       | 2015-16 | -         | 2036               | 1937    | 1369    | 1835              |  |  |  |  |  |  |  |  |
| Pepper    | -       | 2015-16 | -         | 62344              | 61385   | 64685   | -                 |  |  |  |  |  |  |  |  |
| Tapioca   | -       | 2015-16 | -         | 1408               | 1078    | 910     | 1172              |  |  |  |  |  |  |  |  |

**Table 2.16 Crop-wise District-wise Farm Harvest Prices of Principal Crops in India - Madhya Pradesh**

(Rs.per Quintal)

| Crop Name    | Variety | Year    | Season \$ | Alirajpur | Anuppur | Ashoknagar | Balaghat | Barwani | Betul | Bhind | Bhopal | Burhanpur | Chhindwara | Damoh | Datia |
|--------------|---------|---------|-----------|-----------|---------|------------|----------|---------|-------|-------|--------|-----------|------------|-------|-------|
| Bajra        | -       | 2015-16 | -         | 1044      | -       | -          | -        | 1645    | -     | 1305  | -      | -         | -          | -     | 1313  |
| Barley       | -       | 2015-16 | -         | -         | -       | -          | -        | -       | -     | 1588  | -      | -         | -          | -     | 1410  |
| CasterSeed   | -       | 2015-16 | -         | -         | -       | -          | -        | -       | -     | -     | -      | -         | -          | -     | -     |
| Chilly       | Dry     | 2015-16 | -         | -         | -       | -          | -        | -       | -     | 10341 | 11428  | 15580     | 8489       | -     | -     |
| Cotton       | -       | 2015-16 | -         | 4106      | -       | -          | -        | -       | -     | -     | -      | 4089      | 4000       | -     | -     |
| Ginger       | Fresh   | 2015-16 | -         | -         | -       | 7233       | 8900     | 7963    | -     | 3525  | -      | 7478      | 5699       | 5079  | -     |
| Gram         | -       | 2015-16 | -         | 4159      | 4057    | -          | -        | -       | -     | 5483  | 4813   | 5139      | 4606       | 4481  | 4910  |
| Ground Nut   | -       | 2015-16 | -         | 3568      | -       | 3693       | -        | 5693    | 4947  | -     | 6888   | 5000      | 4000       | 3404  | -     |
| Jowar        | -       | 2015-16 | Kharif    | -         | -       | -          | -        | 1430    | -     | 1337  | 2200   | 1364      | 1520       | 1877  | 1985  |
|              |         |         | Rabi      | -         | -       | -          | -        | -       | -     | -     | -      | -         | -          | -     | -     |
| Linseed      | -       | 2015-16 | -         | -         | 4041    | -          | -        | -       | -     | 5700  | 4845   | 5620      | -          | -     | -     |
| Maize        | -       | 2015-16 | -         | 1220      | 1423    | 1719       | 1750     | -       | -     | -     | 1615   | -         | 1242       | 1331  | 1636  |
| Nigerseed    | -       | 2015-16 | -         | -         | 4500    | -          | -        | -       | -     | -     | -      | -         | -          | -     | -     |
| Paddy        | Coarse  | 2015-16 | -         | 1260      | -       | -          | -        | -       | -     | -     | 1507   | -         | -          | 1668  | 1308  |
|              | Fine    | 2015-16 | -         | -         | -       | -          | -        | -       | -     | -     | 2100   | -         | -          | -     | 1497  |
|              | Medium  | 2015-16 | -         | 1440      | -       | -          | -        | -       | -     | -     | 1612   | -         | -          | -     | -     |
| Potato       | Hills   | 2015-16 | Summer    | -         | -       | -          | -        | -       | -     | -     | -      | -         | -          | -     | -     |
|              |         |         | Winter    | -         | 1153    | -          | -        | -       | -     | -     | -      | -         | -          | -     | -     |
| Rape/Mustard | -       | 2015-16 | -         | -         | -       | -          | -        | -       | -     | 3793  | -      | -         | -          | -     | 3696  |
| Rice         | Coarse  | 2015-16 | -         | -         | 2200    | 3513       | -        | 3060    | -     | -     | 2165   | 2225      | 2538       | 1738  | -     |
|              | Fine    | 2015-16 | -         | -         | 3400    | 4953       | -        | 3500    | -     | -     | 3994   | 3240      | 4599       | 3773  | -     |
|              | Medium  | 2015-16 | -         | -         | 2652    | 4083       | -        | -       | -     | -     | 2988   | 2936      | 3800       | 3094  | -     |
| Sannhemp     | -       | 2015-16 | -         | -         | -       | -          | 3400     | -       | -     | -     | -      | -         | -          | -     | -     |
| Sesamum      | -       | 2015-16 | Kharif    | 6125      | -       | 12033      | -        | -       | -     | 5412  | -      | 9800      | 12240      | 8996  | 5653  |
|              |         |         | Rabi      | -         | -       | -          | -        | -       | -     | -     | -      | -         | -          | -     | -     |
| Soyabean     | -       | 2015-16 | -         | -         | -       | -          | 3355     | -       | -     | -     | 3413   | -         | 3254       | -     | -     |
| Sugar Raw    | -       | 2015-16 | -         | -         | -       | 3263       | 3300     | 3935    | -     | -     | 3624   | -         | 3469       | -     | -     |
| Tobacco      | -       | 2015-16 | -         | -         | -       | -          | -        | -       | -     | 12500 | -      | -         | -          | -     | -     |
| Tur Arhar    | Delay   | 2015-16 | -         | 8000      | 7409    | -          | -        | -       | -     | -     | 6800   | 8364      | -          | -     | 9884  |
|              | Early   | 2015-16 | -         | 7500      | -       | -          | -        | -       | -     | -     | 7223   | 7210      | -          | -     | 9800  |
| Turmeric     | -       | 2015-16 | -         | -         | -       | -          | -        | -       | -     | -     | -      | -         | -          | -     | -     |
| Wheat        | -       | 2015-16 | -         | 1586      | 1798    | -          | -        | -       | -     | 1550  | 1991   | 1780      | 1754       | 1522  | 1507  |

**Table 2.16 (Contd.) Crop-wise District-wise Farm Harvest Prices of Principal Crops in India - Madhya Pradesh**

(Rs.per Quintal)

| Crop Name    | Variety | Year    | Season \$ | Dewas | Dhar  | Dindori | Gwalior | Harda | Hoshangabad | Indore | Jabalpur | Jhabua | Katni | Khargone | Mandla |
|--------------|---------|---------|-----------|-------|-------|---------|---------|-------|-------------|--------|----------|--------|-------|----------|--------|
| Bajra        | -       | 2015-16 | -         | -     | 1582  | -       | 1489    | -     | -           | -      | -        | -      | -     | -        | -      |
| Barley       | -       | 2015-16 | -         | -     | -     | -       | 1341    | -     | -           | -      | -        | -      | -     | -        | -      |
| CasterSeed   | -       | 2015-16 | -         | -     | -     | -       | -       | -     | -           | -      | -        | 3907   | -     | -        | -      |
| Chilly       | Dry     | 2015-16 | -         | 6200  | 14348 | -       | 9063    | 8220  | 13937       | 15300  | -        | -      | -     | 14500    | -      |
| Cotton       | -       | 2015-16 | -         | 4285  | 4061  | -       | -       | 5020  | -           | 3982   | -        | -      | -     | 4212     | -      |
| Ginger       | Fresh   | 2015-16 | -         | -     | 4016  | -       | -       | 5750  | 5891        | 8000   | 5636     | -      | 6537  | 10600    | -      |
| Gram         | -       | 2015-16 | -         | 4345  | 4719  | -       | 3700    | 4300  | 5482        | 4000   | 4418     | -      | -     | 4460     | 4700   |
| Ground Nut   | -       | 2015-16 | -         | 3700  | 4765  | -       | 4892    | -     | -           | -      | -        | -      | -     | -        | -      |
| Jowar        | -       | 2015-16 | Kharif    | 1395  | -     | -       | 2200    | 2523  | 2483        | -      | 1733     | -      | -     | 1380     | -      |
|              |         |         | Rabi      | 1489  | -     | -       | -       | -     | -           | -      | -        | -      | -     | -        | 1365   |
| Linseed      | -       | 2015-16 | -         | 4461  | 5162  | -       | 4000    | 4300  | 5940        | -      | 4489     | -      | -     | -        | -      |
| Maize        | -       | 2015-16 | -         | 1414  | 1316  | 1144    | 1218    | -     | -           | 1650   | 1450     | -      | 1306  | 13271470 | 1500   |
| Nigerseed    | -       | 2015-16 | -         | -     | -     | -       | -       | -     | -           | -      | -        | -      | -     | -        | -      |
| Paddy        | Coarse  | 2015-16 | -         | -     | -     | 1483    | 1200    | -     | 1402        | -      | 1300     | -      | 1750  | -        | 1424   |
|              | Fine    | 2015-16 | -         | -     | -     | 2075    | -       | -     | 2384        | -      | 1814     | -      | -     | -        | 1500   |
|              | Medium  | 2015-16 | -         | -     | -     | 1545    | 1400    | -     | 1950        | -      | -        | -      | -     | -        | 1450   |
| Potato       | Hills   | 2015-16 | Summer    | -     | -     | -       | -       | -     | -           | -      | -        | -      | -     | -        | -      |
|              |         |         | Winter    | -     | -     | -       | -       | -     | -           | -      | -        | -      | -     | -        | -      |
| Rape/Mustard | -       | 2015-16 | -         | -     | -     | -       | -       | -     | -           | -      | 3450     | -      | -     | -        | 2600   |
| Rice         | Coarse  | 2015-16 | -         | 2958  | 3350  | -       | -       | 3571  | 2025        | -      | 2400     | -      | 1988  | -        | -      |
|              | Fine    | 2015-16 | -         | -     | 3750  | -       | 2433    | 4000  | 3360        | 4029   | 3500     | -      | 3785  | -        | -      |
|              | Medium  | 2015-16 | -         | -     | 3631  | -       | 32400   | 3800  | 3000        | -      | 2600     | -      | 2520  | -        | -      |
| Sannhemp     | -       | 2015-16 | -         | -     | -     | -       | -       | -     | -           | -      | 2050     | -      | -     | -        | -      |
| Sesamum      | -       | 2015-16 | Kharif    | 6200  | -     | -       | 7513    | 13855 | 13543       | -      | 8800     | -      | -     | -        | 10000  |
|              |         |         | Rabi      | -     | -     | -       | -       | 8625  | -           | -      | -        | -      | -     | -        | -      |
| Soyabean     | -       | 2015-16 | -         | 3218  | 3564  | -       | 3215    | 3475  | 3293        | 3024   | 3656     | -      | -     | -        | -      |
| Sugar Raw    | -       | 2015-16 | -         | 3550  | 3972  | -       | 2920    | -     | -           | 4000   | -        | -      | -     | 3900     | -      |
| Tobacco      | -       | 2015-16 | -         | -     | -     | -       | -       | -     | -           | -      | -        | -      | -     | -        | 14000  |
| Tur Arhar    | Delay   | 2015-16 | -         | 7904  | -     | -       | 7917    | 10000 | -           | 12960  | 7950     | -      | -     | 15520    | 10000  |
|              | Early   | 2015-16 | -         | 7135  | -     | -       | 9500    | 11030 | -           | 8879   | 7860     | -      | -     | -        | -      |
| Turmeric     | -       | 2015-16 | -         | -     | -     | -       | -       | -     | -           | -      | -        | -      | -     | -        | -      |
| Wheat        | -       | 2015-16 | -         | 1585  | 1655  | -       | 1476    | -     | 1614        | 1700   | 1525     | -      | 1598  | 1567     | 1800   |

**Table 2.16 (Contd.) Crop-wise District-wise Farm Harvest Prices of Principal Crops in India - Madhya Pradesh**

(Rs.per Quintal)

| Crop Name    | Variety | Year    | Season \$ | Mandsaur | Morena | Narsinghpur | Panna | Raisen | Ratlam | Sagar | Satna | Sehore | Shahdol | Shajapur | Sheopur |
|--------------|---------|---------|-----------|----------|--------|-------------|-------|--------|--------|-------|-------|--------|---------|----------|---------|
| Bajra        | -       | 2015-16 | -         | -        | 1215   | -           | -     | -      | -      | -     | -     | -      | -       | -        | 1509    |
| Barley       | -       | 2015-16 | -         | -        | -      | -           | -     | -      | -      | -     | 1255  | -      | 1340    | -        | -       |
| CasterSeed   | -       | 2015-16 | -         | -        | -      | -           | -     | -      | -      | -     | -     | -      | -       | -        | -       |
| Chilly       | Dry     | 2015-16 | -         | 15569    | -      | -           | -     | -      | 9500   | -     | -     | 12917  | -       | 10933    | 10782   |
| Cotton       | -       | 2015-16 | -         | -        | -      | -           | -     | -      | 4086   | -     | -     | -      | -       | -        | -       |
| Ginger       | Fresh   | 2015-16 | -         | -        | -      | 5428        | -     | -      | -      | 4538  | 5140  | 7480   | -       | -        | -       |
| Gram         | -       | 2015-16 | -         | -        | -      | -           | 4224  | 4323   | -      | 4364  | 4467  | -      | 5200    | 4836     | 3550    |
| Ground Nut   | -       | 2015-16 | -         | 6995     | -      | -           | -     | -      | -      | 4773  | -     | -      | -       | 3000     | 2971    |
| Jowar        | -       | 2015-16 | Kharif    | 2423     | -      | 2250        | 1950  | 1593   | -      | 1642  | 2000  | 1501   | -       | 2000     | 1500    |
|              |         |         | Rabi      | -        | -      | -           | -     | -      | -      | -     | -     | -      | -       | -        | -       |
| Linseed      | -       | 2015-16 | -         | -        | -      | -           | 4780  | -      | -      | 4964  | 4970  | -      | 4000    | 5300     | -       |
| Maize        | -       | 2015-16 | -         | 1335     | -      | -           | 1434  | 2000   | -      | 1529  | -     | 1400   | 1500    | -        | -       |
| Nigerseed    | -       | 2015-16 | -         | -        | -      | 3000        | -     | 5036   | -      | -     | -     | -      | 3000    | -        | -       |
| Paddy        | Coarse  | 2015-16 | -         | -        | -      | -           | -     | 1320   | -      | -     | -     | 1750   | -       | -        | -       |
|              | Fine    | 2015-16 | -         | -        | -      | -           | -     | 2069   | -      | -     | -     | -      | -       | -        | -       |
|              | Medium  | 2015-16 | -         | -        | -      | -           | -     | 1626   | -      | -     | -     | -      | -       | -        | -       |
| Potato       | Hills   | 2015-16 | Summer    | -        | -      | -           | 1385  | -      | -      | -     | -     | -      | 1333    | -        | -       |
|              |         |         | Winter    | -        | -      | -           | 1041  | -      | -      | -     | 1057  | -      | 1500    | -        | -       |
| Rape/Mustard | -       | 2015-16 | -         | -        | -      | -           | 4000  | -      | -      | -     | -     | -      | 4000    | -        | 3160    |
| Rice         | Coarse  | 2015-16 | -         | -        | 2890   | 2385        | 2397  | 2615   | -      | 2491  | 2309  | -      | 2000    | -        | 3500    |
|              | Fine    | 2015-16 | -         | -        | 3240   | 4113        | 3458  | 3030   | -      | 4837  | 4409  | 4020   | 3000    | -        | 3567    |
|              | Medium  | 2015-16 | -         | -        | -      | 3582        | 2420  | 2810   | -      | 2903  | 2987  | 2188   | 2500    | -        | 3550    |
| Sannhemp     | -       | 2015-16 | -         | -        | -      | -           | -     | -      | -      | -     | -     | -      | -       | -        | -       |
| Sesamum      | -       | 2015-16 | Kharif    | 7318     | 9930   | 6929        | 9100  | 6300   | -      | 10779 | 7314  | -      | 9125    | -        | -       |
|              |         |         | Rabi      | -        | -      | -           | -     | 5508   | -      | -     | -     | -      | -       | -        | -       |
| Soyabean     | -       | 2015-16 | -         | 3670     | -      | 3283        | -     | 3542   | 3615   | 3509  | -     | 3336   | -       | 3408     | 3800    |
| Sugar Raw    | -       | 2015-16 | -         | -        | -      | 2291        | 3348  | -      | -      | -     | -     | 3189   | -       | 3000     | 4100    |
| Tobacco      | -       | 2015-16 | -         | -        | -      | 13000       | -     | -      | -      | -     | 9500  | -      | 10000   | -        | -       |
| Tur Arhar    | Delay   | 2015-16 | -         | 5322     | -      | -           | 7540  | 13825  | -      | 7263  | 7780  | -      | 6000    | -        | 9400    |
|              | Early   | 2015-16 | -         | 5009     | -      | 7755        | 8268  | 14750  | -      | 8242  | 7333  | 7644   | -       | 6667     | 9333    |
| Turmeric     | -       | 2015-16 | -         | -        | -      | -           | -     | -      | -      | -     | -     | -      | 16000   | -        | -       |
| Wheat        | -       | 2015-16 | -         | 1864     | -      | -           | 1568  | 1980   | -      | 1805  | 1540  | -      | 1750    | 1514     | 1533    |

**Table 2.16 (Contd.) Crop-wise District-wise Farm Harvest Prices of Principal Crops in India - Madhya Pradesh**

(Rs.per Quintal)

| Crop Name    | Variety | Year    | Season \$ | Shivani | Shivpuri | Sidhi | Tikamgarh | Umaria |  |  |  |
|--------------|---------|---------|-----------|---------|----------|-------|-----------|--------|--|--|--|
| Bajra        | -       | 2015-16 | -         | -       | 1452     | -     | -         | -      |  |  |  |
| Barley       | -       | 2015-16 | -         | -       | -        | 1300  | 1357      | -      |  |  |  |
| CasterSeed   | -       | 2015-16 | -         | -       | -        | -     | -         | -      |  |  |  |
| Chilly       | Dry     | 2015-16 | -         | -       | 15780    | -     | 9494      | 13500  |  |  |  |
| Cotton       | -       | 2015-16 | -         | -       | -        | -     | -         | -      |  |  |  |
| Ginger       | Fresh   | 2015-16 | -         | -       | -        | -     | 4512      | 5900   |  |  |  |
| Gram         | -       | 2015-16 | -         | 3080    | -        | 3340  | 5192      | -      |  |  |  |
| Ground Nut   | -       | 2015-16 | -         | 6000    | 3574     | -     | -         | -      |  |  |  |
| Jowar        | -       | 2015-16 | Kharif    | -       | -        | 1200  | -         | -      |  |  |  |
|              |         |         | Rabi      | -       | -        | -     | -         | -      |  |  |  |
| Linseed      | -       | 2015-16 | -         | 3080    | -        | 4000  | -         | -      |  |  |  |
| Maize        | -       | 2015-16 | -         | 1274    | 1088     | 1053  | -         | 1000   |  |  |  |
| Nigerseed    |         | 2015-16 | -         | -       | -        | -     | -         | -      |  |  |  |
| Paddy        | Coarse  | 2015-16 | -         | -       | -        | 1300  | -         | -      |  |  |  |
|              | Fine    | 2015-16 | -         | -       | 2017     | -     | -         | -      |  |  |  |
|              | Medium  | 2015-16 | -         | -       | -        | -     | -         | -      |  |  |  |
| Potato       | Hills   | 2015-16 | Summer    | -       | 1089     | -     | 934       | -      |  |  |  |
|              |         |         | Winter    | -       | -        | 1180  | 828       | -      |  |  |  |
| Rape/Mustard | -       | 2015-16 | -         | -       | -        | 3200  | -         | -      |  |  |  |
| Rice         | Coarse  | 2015-16 | -         | 2306    | -        | 2000  | 2338      | -      |  |  |  |
|              | Fine    | 2015-16 | -         | 3300    | -        | 3515  | 3275      | 5000   |  |  |  |
|              | Medium  | 2015-16 | -         | 2589    | 2516     | 2600  | 2588      | 3000   |  |  |  |
| Sannhemp     | -       | 2015-16 | -         | -       | -        | -     | -         | -      |  |  |  |
| Sesamum      | -       | 2015-16 | Kharif    | -       | -        | 7125  | 6547      | -      |  |  |  |
|              |         |         | Rabi      | -       | -        | -     | -         | -      |  |  |  |
| Soyabean     | -       | 2015-16 | -         | 3336    | -        | -     | -         | -      |  |  |  |
| Sugar Raw    | -       | 2015-16 | -         | 3525    | 3471     | -     | 2926      | -      |  |  |  |
| Tobacco      | -       | 2015-16 | -         | -       | -        | -     | -         | 15000  |  |  |  |
| Tur Arhar    | Delay   | 2015-16 | -         | -       | -        | 8250  | -         | -      |  |  |  |
|              | Early   | 2015-16 | -         | -       | -        | 8500  | -         | -      |  |  |  |
| Turmeric     | -       | 2015-16 | -         | -       | -        | -     | 13710     | 11000  |  |  |  |
| Wheat        | -       | 2015-16 | -         | -       | -        | 1500  | 1537      | -      |  |  |  |

**Table 2.17 Crop-wise District-wise Farm Harvest Prices of Principal Crops in India - Maharashtra**

(Rs.per Quintal)

| Crop Name    | Variety | Year    | Season \$ | Ahmednagar | Akola | Amravati | Aurangabad | Beed | Bhandara | Buldhana | Chandrapur | Dhule | Gadchiroli | Gondia | State Wtd Average |
|--------------|---------|---------|-----------|------------|-------|----------|------------|------|----------|----------|------------|-------|------------|--------|-------------------|
| Bajra        | -       | 2015-16 | -         | 1460       | 1574  | 1666     | 1412       | 1510 | -        | 1323     | -          | 1330  | -          | -      | 1454              |
| CasterSeed   | -       | 2015-16 | -         | 3640       | 3134  | -        | 2875       | 2992 | 3280     | -        | 2760       | 3138  | -          | -      | 3051              |
| Gram         | -       | 2015-16 | -         | 3970       | 4269  | 4339     | 4068       | 4121 | 4300     | 4141     | 3926       | 4291  | 3313       | 4041   | 4169              |
| Ground Nut   | -       | 2015-16 | -         | 3265       | 4644  | 4703     | 4490       | 4206 | -        | 4644     | 4585       | 4729  | -          | -      | 3585              |
| Jowar        | -       | 2015-16 | -         | 1687       | 1324  | 1446     | 1559       | 1894 | -        | 1255     | 1350       | 1475  | 1248       | -      | 1763              |
| Linseed      | -       | 2015-16 | -         | -          | -     | -        | 1590       | 1750 | 4333     | -        | 4309       | -     | 4067       | 4309   | 4290              |
| Maize        | -       | 2015-16 | -         | 1321       | 1304  | 1335     | 1322       | 1391 | -        | 1227     | -          | 1297  | 1205       | -      | 1351              |
| Nigerseed    |         | 2015-16 | -         | 4608       | -     | -        | 4608       | 4608 | -        | -        | -          | 4608  | -          | -      | 5249              |
| Paddy        | -       | 2015-16 | -         | 1642       | -     | 1267     | -          | 1051 | 1682     | 1267     | 1947       | 1380  | 1674       | 1535   | 1660              |
| Ragi         | -       | 2015-16 | -         | 1678       | -     | -        | -          | -    | -        | -        | -          | 1678  | -          | -      | 1837              |
| Rape/Mustard | -       | 2015-16 | -         | 3510       | 3056  | 3190     | -          | 3606 | 2618     | 3246     | 2991       | -     | 2991       | 1991   | 3656              |
| Sesamum      | -       | 2015-16 | -         | 7785       | 6274  | 8127     | 8376       | 6963 | 5496     | 6483     | 5496       | 5968  | 5253       | 5496   | 6625              |
| Soyabean     | -       | 2015-16 | -         | 3453       | 3390  | 3380     | 3541       | 3549 | 3159     | 3468     | 3409       | 3390  | 3280       | -      | 3490              |
| Sunflower    | -       | 2015-16 | -         | 3215       | 3279  | 2911     | 3164       | 3380 | -        | 3180     | -          | 3128  | -          | -      | 3446              |
| Tur Arhar    | -       | 2015-16 | -         | 7344       | 7884  | 8038     | 7286       | 7431 | 6697     | 7703     | 7076       | 6765  | 7079       | 7290   | 7741              |
| Wheat        | -       | 2015-16 | -         | 1718       | 1510  | 1569     | 1644       | 1839 | 1501     | 1529     | 1660       | 1580  | 1689       | 1689   | 1706              |

**Table 2.17 (Contd.) Crop-wise District-wise Farm Harvest Prices of Principal Crops in India - Maharashtra**

(Rs.per Quintal)

| Crop Name    | Variety | Year    | Season \$ | Hingoli | Jalgaon | Jalna | Kolhapur | Latur | Nagpur | Nanded | Nandurbar | Nasik | Osmanabad | Parbhani | State Wtd Average |
|--------------|---------|---------|-----------|---------|---------|-------|----------|-------|--------|--------|-----------|-------|-----------|----------|-------------------|
| Bajra        | -       | 2015-16 | -         | 1409    | 1379    | 1400  | 1989     | 1460  | -      | 1450   | 1308      | 1452  | 1474      | 1260     | 1454              |
| CasterSeed   | -       | 2015-16 | -         | 3135    | 2525    | 3052  | -        | 3002  | 2760   | 2800   | 3075      | 3160  | 3278      | 3156     | 3051              |
| Gram         | -       | 2015-16 | -         | 4135    | 4111    | 4189  | 6178     | 4340  | 4152   | 4124   | 4118      | 4173  | 4200      | 4032     | 4169              |
| Ground Nut   | -       | 2015-16 | -         | -       | 4541    | 4424  | 2813     | 5491  | 4585   | 5024   | 3933      | 4731  | 3094      | 4902     | 3585              |
| Jowar        | -       | 2015-16 | -         | 1564    | 1379    | 1493  | 2761     | 1768  | 1344   | 1339   | 1481      | 1565  | 1855      | 1453     | 1763              |
| Linseed      | -       | 2015-16 | -         | -       | -       | -     | -        | 4871  | 4632   | 4511   | -         | -     | 4404      | 4511     | 4290              |
| Maize        | -       | 2015-16 | -         | 1451    | 1320    | 1286  | 1666     | -     | 1295   | 1393   | 1349      | 1383  | 1397      | 1350     | 1351              |
| Nigerseed    |         | 2015-16 | -         | 8786    | 4608    | 4608  | 4608     | 8028  | -      | 8786   | 4608      | 4608  | 9100      | 8786     | 5249              |
| Paddy        | -       | 2015-16 | -         | -       | -       | -     | 1846     | 1022  | 1893   | 1181   | 1305      | 1859  | 1040      | 1051     | 1660              |
| Ragi         | -       | 2015-16 | -         | -       | -       | -     | 1678     | -     | -      | -      | 2000      | 1678  | -         | -        | 1837              |
| Rape/Mustard | -       | 2015-16 | -         | 3100    | 4000    | -     | -        | 3640  | 3048   | 3505   | 4000      | 4000  | 3605      | 3610     | 3656              |
| Sesamum      | -       | 2015-16 | -         | 6353    | 6366    | 6485  | -        | 6152  | 6940   | 6990   | 8200      | 6000  | 6983      | 6558     | 6625              |
| Soyabean     | -       | 2015-16 | -         | 3509    | 3302    | 3472  | 3563     | 3636  | 3421   | 3549   | 3553      | 3635  | 3586      | 3463     | 3490              |
| Sunflower    | -       | 2015-16 | -         | -       | 3169    | 2805  | 3440     | 3566  | 3110   | 3129   | 3999      | 3713  | 3345      | 3432     | 3446              |
| Tur Arhar    | -       | 2015-16 | -         | 7973    | 6886    | 7525  | 7450     | 8697  | 7202   | 8028   | 7227      | 7809  | 7989      | 7347     | 7741              |
| Wheat        | -       | 2015-16 | -         | 1760    | 1506    | 1674  | 2679     | 1920  | 1747   | 1513   | 1615      | 1596  | 2199      | 1616     | 1706              |



**Table 2.17 (Contd.) Crop-wise District-wise Farm Harvest Prices of Principal Crops in India - Maharashtra**

(Rs.per Quintal)

| Crop Name    | Variety | Year    | Season \$ | Pune | Raigarh | Ratnagiri | Sangli | Satara | Sindhudurg | Solapur | Thane | Wardha | Washim | Yavatmal | State Wtd Average |
|--------------|---------|---------|-----------|------|---------|-----------|--------|--------|------------|---------|-------|--------|--------|----------|-------------------|
| Bajra        | -       | 2015-16 | -         | 1609 | -       | -         | 1666   | 1578   | -          | 1463    | -     | -      | 1676   | 1582     | 1454              |
| CasterSeed   | -       | 2015-16 | -         | 3100 | -       | -         | 3200   | 3200   | -          | 3333    | -     | -      | -      | 3134     | 3051              |
| Gram         | -       | 2015-16 | -         | 4172 | 5222    | -         | 4297   | 4135   | -          | 4145    | 5222  | 3999   | 4201   | 4027     | 4169              |
| Ground Nut   | -       | 2015-16 | -         | 4141 | 3957    | 3957      | 2862   | 2944   | 3957       | 4248    | -     | 4585   | 4644   | 5093     | 3585              |
| Jowar        | -       | 2015-16 | -         | 1960 | -       | -         | 2217   | 2018   | -          | 1944    | -     | 1359   | 1337   | 1184     | 1763              |
| Linseed      | -       | 2015-16 | -         | -    | -       | -         | -      | -      | -          | 4000    | -     | 5300   | -      | -        | 4290              |
| Maize        | -       | 2015-16 | -         | 1449 | -       | -         | 1495   | 1447   | -          | 1429    | -     | -      | -      | -        | 1351              |
| Nigerseed    |         | 2015-16 | -         | 4608 | 4608    | 4608      | 4608   | 4608   | 4608       | 4608    | 4608  | -      | -      | -        | 5249              |
| Paddy        | -       | 2015-16 | -         | 1642 | 1565    | 1503      | 2681   | 1959   | 1503       | 1532    | 1565  | -      | 1267   | -        | 1660              |
| Ragi         | -       | 2015-16 | -         | 1678 | 2091    | 2091      | -      | 1678   | 2091       | -       | 2091  | -      | -      | -        | 1837              |
| Rape/Mustard | -       | 2015-16 | -         | 4071 | 4000    | 4000      | 3704   | 3704   | -          | 3510    | 4000  | -      | 3142   | -        | 3656              |
| Sesamum      | -       | 2015-16 | -         | 6806 | 9671    | 9671      | -      | 7785   | 9671       | 9200    | 9671  | -      | 5430   | -        | 6625              |
| Soyabean     | -       | 2015-16 | -         | 3257 | -       | -         | 3562   | 3563   | -          | 3643    | -     | 3439   | 3542   | 3443     | 3490              |
| Sunflower    | -       | 2015-16 | -         | 3193 | 3913    | 3913      | 3440   | 3440   | 3913       | 3446    | 3913  | -      | -      | -        | 3446              |
| Tur Arhar    | -       | 2015-16 | -         | 6636 | 7010    | 7010      | 7450   | 7450   | 7010       | 8049    | 7010  | 7689   | 7963   | 7843     | 7741              |
| Wheat        | -       | 2015-16 | -         | 1915 | -       | -         | 2625   | 1745   | -          | 1892    | -     | 1515   | 1572   | 1520     | 1706              |

**Table 2.18 Crop-wise District-wise Farm Harvest Prices of Principal Crops in India - Manipur**

(Rs.per Quintal)

| Crop Name    | Variety | Year    | Season \$ | Manipur | State Wtd Average |  |  |  |  |  |  |  |  |  |  |
|--------------|---------|---------|-----------|---------|-------------------|--|--|--|--|--|--|--|--|--|--|
| Ginger       | -       | 2015-16 | Rabi      | 3500    | 3500              |  |  |  |  |  |  |  |  |  |  |
| Maize        | -       | 2015-16 | Rabi      | 1425    | 1425              |  |  |  |  |  |  |  |  |  |  |
| Paddy        | -       | 2015-16 | Rabi      | 1433    | 1433              |  |  |  |  |  |  |  |  |  |  |
| Potato       | -       | 2015-16 | Rabi      | 1211    | 1211              |  |  |  |  |  |  |  |  |  |  |
| Rape/Mustard | -       | 2015-16 | Rabi      | 3000    | 3000              |  |  |  |  |  |  |  |  |  |  |
| Sugarcane    | -       | 2015-16 | Rabi      | 840     | 840               |  |  |  |  |  |  |  |  |  |  |

**Table 2.19 Crop-wise District-wise Farm Harvest Prices of Principal Crops in India - Mizoram**

(Rs.per Quintal)

| Crop Name    | Variety | Year    | Season \$ | Mizoram | State Wtd Average |  |  |  |  |  |  |  |  |  |  |
|--------------|---------|---------|-----------|---------|-------------------|--|--|--|--|--|--|--|--|--|--|
| Banana       | -       | 2015-16 | -         | 1261    | 1261              |  |  |  |  |  |  |  |  |  |  |
| Chilly       | -       | 2015-16 | -         | 17010   | 17010             |  |  |  |  |  |  |  |  |  |  |
| Coconut      | -       | 2015-16 | -         | 930     | 930               |  |  |  |  |  |  |  |  |  |  |
| Cotton       | -       | 2015-16 | -         | 4520    | 4520              |  |  |  |  |  |  |  |  |  |  |
| Ginger       | -       | 2015-16 | -         | 1558    | 1558              |  |  |  |  |  |  |  |  |  |  |
| Maize        | -       | 2015-16 | -         | 1440    | 1440              |  |  |  |  |  |  |  |  |  |  |
| Paddy        | -       | 2015-16 | -         | 1912    | 1912              |  |  |  |  |  |  |  |  |  |  |
| Potato       | -       | 2015-16 | -         | 1902    | 1902              |  |  |  |  |  |  |  |  |  |  |
| Rape/Mustard | -       | 2015-16 | -         | 3534    | 3534              |  |  |  |  |  |  |  |  |  |  |
| Rice         | -       | 2015-16 | -         | 2433    | 2433              |  |  |  |  |  |  |  |  |  |  |
| Sesamum      | -       | 2015-16 | -         | 5525    | 5525              |  |  |  |  |  |  |  |  |  |  |
| Soyabean     | -       | 2015-16 | -         | 6474    | 6474              |  |  |  |  |  |  |  |  |  |  |
| Sugar Raw    | -       | 2015-16 | -         | 4500    | -                 |  |  |  |  |  |  |  |  |  |  |
| Sugarcane    | -       | 2015-16 | -         | 921     | 921               |  |  |  |  |  |  |  |  |  |  |
| Tobacco      | -       | 2015-16 | -         | 20922   | 20922             |  |  |  |  |  |  |  |  |  |  |
| Tur Arhar    | -       | 2015-16 | -         | 3609    | 3609              |  |  |  |  |  |  |  |  |  |  |
| Turmeric     | -       | 2015-16 | -         | 1163    | 1163              |  |  |  |  |  |  |  |  |  |  |

**Table 2.20 Crop-wise District-wise Farm Harvest Prices of Principal Crops in India - Nagaland**

(Rs.per Quintal)

| Crop Name | Variety | Year    | Season \$ | Nagaland | State Wtd Average |  |  |  |  |  |  |  |  |  |  |
|-----------|---------|---------|-----------|----------|-------------------|--|--|--|--|--|--|--|--|--|--|
| Ginger    | -       | 2015-16 | -         | 3000     | 3000              |  |  |  |  |  |  |  |  |  |  |
| Maize     | -       | 2015-16 | -         | 1200     | 1200              |  |  |  |  |  |  |  |  |  |  |

**Table 2.21 Crop-wise District-wise Farm Harvest Prices of Principal Crops in India - Orissa**

(Rs.per Quintal)

| Crop Name    | Variety | Year    | Season \$ | Angul | Balasore | Bargarh | Bhadrak | Bolangir | Bouth | Cuttack | Deogarh | Dhenkanal | Gajpati | Ganjam | State Wtd Average |
|--------------|---------|---------|-----------|-------|----------|---------|---------|----------|-------|---------|---------|-----------|---------|--------|-------------------|
| Ground Nut   | -       | 2015-16 | -         | 4027  | 4063     | 3325    | 4100    | 3200     | 4000  | 3900    | -       | 4019      | 3400    | 3300   | 3672              |
| Jute         | -       | 2015-16 | -         | -     | 2900     | -       | 2967    | -        | -     | 2985    | -       | -         | -       | -      | 2920              |
| Maize        | -       | 2015-16 | -         | 1250  | 1350     | 1300    | -       | 1265     | -     | 1400    | -       | 1300      | 1300    | 1325   | 1205              |
| Paddy        | -       | 2015-16 | -         | 1361  | 1319     | 1330    | 1328    | 1289     | 1353  | 1310    | 1410    | 1360      | 1402    | 1359   | 1335              |
| Potato       | -       | 2015-16 | -         | 906   | 800      | 875     | 867     | -        | 925   | 900     | 950     | 900       | 833     | 825    | 871               |
| Ragi         | -       | 2015-16 | -         | 1650  | -        | -       | -       | 1600     | 1620  | 1585    | -       | 1575      | 1500    | 1500   | 1511              |
| Rape/Mustard | -       | 2015-16 | -         | 4391  | 4263     | 4367    | 4300    | 4333     | 4300  | 4375    | 4300    | 4200      | 4367    | -      | 4195              |
| Sesamum      | -       | 2015-16 | -         | 4792  | 5081     | 5100    | -       | 4950     | 5100  | 5000    | -       | 4800      | 4500    | 4500   | 4684              |
| Sugarcane    | -       | 2015-16 | -         | 267   | 258      | 233     | 257     | 245      | 266   | 250     | -       | 250       | 245     | 230    | 240               |
| Wheat        | -       | 2015-16 | -         | 1681  | 1538     | 1600    | 1565    | 1600     | 1600  | 1600    | 1575    | 1600      | -       | -      | 1651              |

**Table 2.21 (Contd.) Crop-wise District-wise Farm Harvest Prices of Principal Crops in India - Orissa**

(Rs.per Quintal)

| Crop Name    | Variety | Year    | Season \$ | Jagatsinghpur | Jajpur | Jharsuguda | Kalahandi | Kandhamal | Kendrapara | Keonjhar | Khurda | Koraput | Malkangiri | Mayurbhanj | State Wtd Average |
|--------------|---------|---------|-----------|---------------|--------|------------|-----------|-----------|------------|----------|--------|---------|------------|------------|-------------------|
| Ground Nut   | -       | 2015-16 | -         | 3700          | 3600   | 3500       | 3600      | 4000      | 3850       | 4183     | 3775   | 3600    | 4000       | 3729       | 3672              |
| Jute         | -       | 2015-16 | -         | 3000          | 2975   | -          | -         | -         | 2800       | 2900     | -      | -       | -          | -          | 2920              |
| Maize        | -       | 2015-16 | -         | 1350          | -      | 1320       | 1300      | 1375      | -          | 1350     | -      | 1320    | 1350       | 1283       | 1205              |
| Paddy        | -       | 2015-16 | -         | 1285          | 1206   | 1361       | 1435      | 1363      | 1345       | 1340     | 1363   | 1279    | 1295       | 1308       | 1335              |
| Potato       | -       | 2015-16 | -         | 860           | 833    | 1000       | -         | 953       | 800        | 967      | 825    | 822     | -          | 950        | 871               |
| Ragi         | -       | 2015-16 | -         | -             | -      | -          | 1600      | 1650      | -          | -        | 1685   | 1476    | 1463       | -          | 1511              |
| Rape/Mustard | -       | 2015-16 | -         | -             | -      | 4350       | 4300      | 4295      | 4375       | 4233     | 4300   | 4300    | -          | 4237       | 4195              |
| Sesamum      | -       | 2015-16 | -         | -             | -      | 5100       | 5050      | 5000      | -          | 5000     | 5000   | 5067    | 4500       | 4720       | 4684              |
| Sugarcane    | -       | 2015-16 | -         | 250           | 250    | -          | 262       | -         | 248        | 260      | 250    | 235     | -          | -          | 240               |
| Wheat        | -       | 2015-16 | -         | -             | 1600   | 1600       | 1620      | -         | 1620       | 1633     | 1650   | -       | 1500       | 1620       | 1651              |

**Table 2.21 (Contd.) Crop-wise District-wise Farm Harvest Prices of Principal Crops in India - Orissa**

(Rs.per Quintal)

| Crop Name    | Variety | Year    | Season \$ | Nabarangapur | Nayagarh | Nuapara | Puri | Rayagada | Sambalpur | Sonepur | Sundargarh | State Wtd Average |  |  |  |
|--------------|---------|---------|-----------|--------------|----------|---------|------|----------|-----------|---------|------------|-------------------|--|--|--|
| Ground Nut   | -       | 2015-16 | -         | 4000         | 3863     | 4050    | 3800 | 4222     | 4200      | 4175    | 4200       | 3672              |  |  |  |
| Jute         | -       | 2015-16 | -         | -            | -        | -       | -    | -        | -         | -       | -          | 2920              |  |  |  |
| Maize        | -       | 2015-16 | -         | 1159         | 1199     | -       | -    | 1149     | 2160      | -       | -          | 1205              |  |  |  |
| Paddy        | -       | 2015-16 | -         | 1287         | 1360     | 1400    | 1354 | 1342     | 1356      | 1433    | 1274       | 1335              |  |  |  |
| Potato       | -       | 2015-16 | -         | 945          | 900      | 985     | 871  | 902      | 955       | 1000    | 1000       | 871               |  |  |  |
| Ragi         | -       | 2015-16 | -         | 1588         | 1675     | 1645    | 1700 | 1650     | 1665      | 1720    | -          | 1511              |  |  |  |
| Rape/Mustard | -       | 2015-16 | -         | 4000         | 4338     | -       | -    | 4400     | 4333      | 4427    | 4400       | 4195              |  |  |  |
| Sesamum      | -       | 2015-16 | -         | -            | 4800     | 5100    | 4800 | 4700     | 4733      | 5100    | 4917       | 4684              |  |  |  |
| Sugarcane    | -       | 2015-16 | -         | 255          | 245      | -       | 252  | -        | 260       | 255     | 260        | 240               |  |  |  |
| Wheat        | -       | 2015-16 | -         | 1700         | 1550     | -       | -    | -        | 1550      | 1575    | 1700       | 1651              |  |  |  |

**Table 2.22 Crop-wise District-wise Farm Harvest Prices of Principal Crops in India - Pondicherry**

(Rs.per Quintal)

| Crop Name  | Variety | Year    | Season \$ | Karaikal | Puducherry | Yanam | State Wtd Average |  |  |  |  |  |  |  |  |
|------------|---------|---------|-----------|----------|------------|-------|-------------------|--|--|--|--|--|--|--|--|
| Bajra      | -       | 2015-16 | -         | -        | 1538       | -     | 1538              |  |  |  |  |  |  |  |  |
| Cotton     | -       | 2015-16 | -         | 3559     | 2038       | -     | 2799              |  |  |  |  |  |  |  |  |
| Ground Nut | -       | 2015-16 | -         | -        | 5339       | -     | 5339              |  |  |  |  |  |  |  |  |
| Paddy      | Fine    | 2015-16 | -         | 1930     | 2170       | 1937  | 2170              |  |  |  |  |  |  |  |  |
| Ragi       | -       | 2015-16 | -         | -        | 1642       | -     | 1642              |  |  |  |  |  |  |  |  |
| Sesamum    | -       | 2015-16 | -         | -        | 3868       | -     | 3868              |  |  |  |  |  |  |  |  |



**Table 2.23 Crop-wise District-wise Farm Harvest Prices of Principal Crops in India - Punjab**

(Rs.per Quintal)

| Crop Name  | Variety  | Year    | Season \$ | Amritsar | Barnala | Bhatinda | Faridkot | Fatehgarh Sahib | Fazilka | Firozpur | Gurdaspur | Hoshiarpur | Jalandhar | kapurthala | State Wtd Average |
|------------|----------|---------|-----------|----------|---------|----------|----------|-----------------|---------|----------|-----------|------------|-----------|------------|-------------------|
| Barley     | -        | 2015-16 | -         | -        | -       | 1183     | -        | -               | 1050    | -        | -         | -          | -         | -          | 1127              |
| Cotton     | American | 2015-16 | -         | -        | 5400    | 5200     | 4300     | -               | 4590    | -        | -         | -          | -         | -          | 4691              |
|            | Desi     | 2015-16 | -         | -        | -       | 3800     | -        | -               | 4350    | -        | -         | -          | -         | -          | 4240              |
| Gram       | -        | 2015-16 | -         | -        | -       | 3175     | -        | -               | 3175    | -        | -         | 3175       | -         | -          | 2808              |
| Ground Nut | -        | 2015-16 | -         | -        | -       | -        | -        | -               | -       | -        | -         | 4030       | -         | -          | 4030              |
| Maize      | -        | 2015-16 | -         | -        | -       | -        | -        | 1225            | -       | -        | 1130      | 1325       | 1325      | 1325       | 1322              |
| Sesamum    | -        | 2015-16 | -         | 9000     | -       | -        | -        | -               | -       | 9000     | -         | -          | -         | -          | 9000              |
| Sugarcane  | -        | 2015-16 | -         | 300      | 300     | -        | -        | 300             | 300     | -        | 300       | 300        | 300       | 300        | 300               |
| Wheat      | -        | 2015-16 | -         | 1500     | 1525    | 1400     | 1450     | 1525            | 1450    | 1400     | 1450      | 1450       | 1400      | 1450       | 1667              |

**Table 2.23 (Contd.) Crop-wise District-wise Farm Harvest Prices of Principal Crops in India - Punjab**

(Rs.per Quintal)

| Crop Name  | Variety  | Year    | Season \$ | Ludhiana | Mansa | Moga | Muktsar | Nawanshah ar | Pathankot | Patiala | Rupnagar | S.A.S.Nagar | Sangrur | Tarean Taran | State Wtd Average |
|------------|----------|---------|-----------|----------|-------|------|---------|--------------|-----------|---------|----------|-------------|---------|--------------|-------------------|
| Barley     | -        | 2015-16 | -         | 1150     | 1183  | -    | 1050    | -            | -         | 1150    | -        | -           | 1500    | -            | 1127              |
| Cotton     | American | 2015-16 | -         | -        | 4913  | 4590 | 4590    | -            | -         | 5200    | -        | -           | 5200    | -            | 4691              |
|            | Desi     | 2015-16 | -         | -        | -     | -    | -       | -            | -         | -       | -        | -           | -       | -            | 4240              |
| Gram       | -        | 2015-16 | -         | -        | 3175  | -    | 3175    | -            | 5000      | -       | 3175     | 3175        | -       | -            | 2808              |
| Ground Nut | -        | 2015-16 | -         | -        | -     | -    | -       | -            | -         | -       | -        | -           | -       | -            | 4030              |
| Maize      | -        | 2015-16 | -         | 1325     | -     | -    | -       | 1225         | 1000      | 1325    | 1485     | 1225        | 1325    | 1130         | 1322              |
| Sesamum    | -        | 2015-16 | -         | -        | -     | -    | -       | -            | 9000      | -       | -        | -           | -       | 9000         | 9000              |
| Sugarcane  | -        | 2015-16 | -         | 300      | -     | -    | -       | 300          | 290       | 300     | 300      | 300         | 300     | -            | 300               |
| Wheat      | -        | 2015-16 | -         | 1450     | 1475  | 1400 | 1450    | 1450         | 1450      | 1400    | 1450     | 1400        | 1400    | 1400         | 1667              |

**Table 2.24 Crop-wise District-wise Farm Harvest Prices of Principal Crops in India - Rajasthan**

(Rs.per Quintal)

| Crop Name    | Variety | Year    | Season \$ | Ajmer | Alwar | Banswara | Baran | Barmer | Bharatpur | Bhilwara | Bikaner | Bundi | Chittorgarh | Churu | State Wtd Average |
|--------------|---------|---------|-----------|-------|-------|----------|-------|--------|-----------|----------|---------|-------|-------------|-------|-------------------|
| Bajra        | -       | 2015-16 | Kharif    | 1319  | 1174  | 1336     | 1210  | 1404   | 1264      | 1249     | 1390    | 1444  | -           | 1233  | 1267              |
| Barley       | -       | 2015-16 | Rabi      | 1456  | 1345  | 1647     | 1322  | 830    | 1458      | 1517     | 1371    | 1410  | 1378        | 1451  | 1408              |
| CasterSeed   | -       | 2015-16 | Rabi      | 5900  | -     | 2663     | -     | 3417   | -         | 3212     | -       | -     | -           | -     | 3183              |
| Chilly       | Dry     | 2015-16 | Kharif    | 12644 | 10151 | 10722    | 10715 | -      | -         | 12806    | -       | -     | 10963       | -     | 10905             |
| Cotton       | -       | 2015-16 | Kharif    | 4780  | 4308  | 4530     | -     | 6250   | 4415      | 4493     | -       | -     | 4337        | -     | 4565              |
|              | Lint    | 2015-16 | Kharif    | -     | -     | 15935    | -     | -      | -         | 8378     | -       | -     | -           | -     | 11026             |
| Ginger       | -       | 2015-16 | Kharif    | -     | -     | -        | -     | -      | -         | -        | -       | -     | -           | -     | 5062              |
| Gram         | -       | 2015-16 | Rabi      | 5150  | 4566  | 4512     | 4963  | 4015   | 5355      | 5354     | 5366    | 4975  | 5389        | 5786  | 4318              |
| Ground Nut   | -       | 2015-16 | Kharif    | 4414  | 5248  | 3406     | 4031  | 4629   | 3151      | 4077     | 3849    | 5023  | 4336        | 4613  | 3878              |
| Jowar        | -       | 2015-16 | Kharif    | 1719  | 1150  | 1129     | 1608  | 1742   | 1664      | 1385     | -       | 1803  | 1576        | -     | 1807              |
| Linseed      | -       | 2015-16 | Rabi      | 5900  | -     | -        | 4131  | 2444   | -         | 2327     | -       | -     | 5168        | -     | 3803              |
| Maize        | -       | 2015-16 | Kharif    | 1580  | 1466  | 1342     | 1514  | -      | -         | 1455     | -       | 1429  | 1334        | -     | 1422              |
| Paddy        | -       | 2015-16 | Kharif    | -     | -     | 1320     | -     | -      | 2239      | -        | -       | -     | -           | -     | 1662              |
| Potato       | -       | 2015-16 | Rabi      | 1950  | 915   | 1391     | 1451  | -      | 932       | 1974     | -       | 1748  | 824         | -     | 939               |
| Rape/Mustard | -       | 2015-16 | Rabi      | 3978  | 3802  | 4230     | 3546  | 3971   | 3968      | 3515     | 3560    | 3747  | 3963        | 3729  | 3826              |
| Rice         | -       | 2015-16 | Kharif    | 2686  | 2521  | 3890     | 2462  | -      | -         | 1783     | -       | 2231  | 2958        | -     | 2274              |
| Sannhemp     | -       | 2015-16 | Kharif    | -     | -     | 2904     | -     | -      | -         | -        | -       | -     | -           | -     | 2429              |
| Sesamum      | -       | 2015-16 | Kharif    | 8215  | 5410  | 7685     | 7083  | 6739   | 7429      | 8716     | 6188    | 7485  | 10221       | 6522  | 7046              |
| Sugar Raw    | -       | 2015-16 | Rabi      | 3025  | 3230  | 3924     | 4158  | -      | 3270      | 3569     | -       | -     | 3302        | -     | 3323              |
| Tur Arhar    | -       | 2015-16 | Rabi      | -     | 6285  | -        | -     | -      | 7243      | -        | -       | 9160  | 5575        | -     | 6425              |
| Wheat        | -       | 2015-16 | Rabi      | 1733  | 1541  | -        | 1560  | 1554   | 1904      | 1525     | 1727    | 1623  | 1562        | 1592  | 1596              |

**Table 2.24 (Contd.) Crop-wise District-wise Farm Harvest Prices of Principal Crops in India - Rajasthan**

(Rs.per Quintal)

| Crop Name    | Variety | Year    | Season \$ | Dausa | Dholpur | Dungarpur | Ganganagar | Hanumangarh | Jaipur | Jalor | Jhalawar | Jhunjunu | Jodhpur | Karauli | State Wtd Average |
|--------------|---------|---------|-----------|-------|---------|-----------|------------|-------------|--------|-------|----------|----------|---------|---------|-------------------|
| Bajra        | -       | 2015-16 | Kharif    | 1270  | 1177    | 1310      | 1352       | 1348        | 1310   | 1386  | 1500     | 1238     | 1344    | 1265    | 1267              |
| Barley       | -       | 2015-16 | Rabi      | 1377  | 1451    | -         | 1380       | 1225        | -      | 1778  | -        | 1428     | 1558    | 1457    | 1408              |
| CasterSeed   | -       | 2015-16 | Rabi      | -     | -       | -         | -          | 3314        | -      | 3028  | -        | -        | 3057    | -       | 3183              |
| Chilly       | Dry     | 2015-16 | Kharif    | -     | -       | 11648     | -          | 12000       | -      | 8000  | 11993    | -        | 11864   | -       | 10905             |
| Cotton       | -       | 2015-16 | Kharif    | -     | -       | -         | 4400       | 4503        | -      | 6100  | -        | -        | 4928    | -       | 4565              |
|              | Lint    | 2015-16 | Kharif    | -     | -       | -         | -          | 11500       | -      | -     | -        | -        | -       | -       | 11026             |
| Ginger       | -       | 2015-16 | Kharif    | -     | -       | 6762      | -          | -           | -      | -     | -        | -        | -       | -       | 5062              |
| Gram         | -       | 2015-16 | Rabi      | 4659  | 6150    | -         | 5193       | 4523        | -      | 3500  | -        | 5698     | 5069    | 5181    | 4318              |
| Ground Nut   | -       | 2015-16 | Kharif    | 3865  | 6000    | 4773      | -          | 3979        | 4320   | 3957  | 4195     | 4022     | 3926    | -       | 3878              |
| Jowar        | -       | 2015-16 | Kharif    | 1661  | 1132    | 1300      | -          | -           | 1730   | 1793  | 1817     | -        | 1656    | -       | 1807              |
| Linseed      | -       | 2015-16 | Rabi      | -     | -       | -         | -          | -           | -      | -     | -        | -        | -       | -       | 3803              |
| Maize        | -       | 2015-16 | Kharif    | 1553  | 1460    | 1372      | -          | -           | 1690   | 1500  | 1322     | -        | 1640    | -       | 1422              |
| Paddy        | -       | 2015-16 | Kharif    | -     | -       | 1664      | -          | 1692        | -      | -     | -        | -        | -       | -       | 1662              |
| Potato       | -       | 2015-16 | Rabi      | -     | 957     | -         | -          | 518         | -      | 925   | -        | -        | -       | -       | 939               |
| Rape/Mustard | -       | 2015-16 | Rabi      | 3838  | 3867    | -         | 3839       | 3531        | -      | 3311  | -        | 3888     | 4246    | 3869    | 3826              |
| Rice         | -       | 2015-16 | Kharif    | -     | -       | 2477      | -          | 2875        | -      | -     | 2623     | -        | -       | -       | 2274              |
| Sannhemp     | -       | 2015-16 | Kharif    | -     | -       | 1305      | -          | -           | -      | -     | -        | -        | -       | -       | 2429              |
| Sesamum      | -       | 2015-16 | Kharif    | 6667  | 9022    | 8404      | -          | 6633        | 7100   | 6886  | 7399     | -        | 6737    | 6625    | 7046              |
| Sugar Raw    | -       | 2015-16 | Rabi      | -     | -       | -         | -          | 3014        | -      | -     | -        | -        | -       | -       | 3323              |
| Tur Arhar    | -       | 2015-16 | Rabi      | -     | -       | -         | -          | -           | -      | -     | -        | -        | -       | -       | 6425              |
| Wheat        | -       | 2015-16 | Rabi      | 1693  | 1573    | 1451      | -          | 1608        | 1506   | 1933  | -        | 1642     | 2052    | 1577    | 1596              |

**Table 2.24 (Contd.) Crop-wise District-wise Farm Harvest Prices of Principal Crops in India - Rajasthan**

(Rs.per Quintal)

| Crop Name    | Variety | Year    | Season \$ | Kota | Nagaur | Pali | Pratapgarh | Rajsamand | Sawai Madhopur | Sikar | Sirohi | Tonk | Udaipur | State Wtd Average |
|--------------|---------|---------|-----------|------|--------|------|------------|-----------|----------------|-------|--------|------|---------|-------------------|
| Bajra        | -       | 2015-16 | Kharif    | -    | 1416   | 1414 | -          | 1262      | 1257           | 1228  | 1571   | 1290 | -       | 1267              |
| Barley       | -       | 2015-16 | Rabi      | 1239 | 1528   | 1630 | 1335       | 1300      | 1492           | 1428  | 1756   | 1370 | 1416    | 1408              |
| CasterSeed   | -       | 2015-16 | Rabi      | -    | -      | 3126 | -          | -         | -              | -     | 3349   | 2707 | -       | 3183              |
| Chilly       | Dry     | 2015-16 | Kharif    | 6828 | 10897  | 1160 | -          | 9500      | -              | -     | 9371   | -    | 12913   | 10905             |
| Cotton       | -       | 2015-16 | Kharif    | -    | 4822   | 4561 | 4385       | 4889      | -              | 7937  | 4318   | 4150 | 4233    | 4565              |
|              | Lint    | 2015-16 | Kharif    | -    | -      | -    | -          | 11214     | -              | -     | -      | -    | -       | 11026             |
| Ginger       | -       | 2015-16 | Kharif    | -    | -      | -    | -          | -         | -              | -     | -      | -    | 4000    | 5062              |
| Gram         | -       | 2015-16 | Rabi      | 3734 | 4791   | 5019 | 4631       | 3045      | 4756           | 4987  | 7306   | 4743 | 4365    | 4318              |
| Ground Nut   | -       | 2015-16 | Kharif    | 3903 | 4010   | 5853 | 4380       | 4500      | 3578           | 4090  | 3897   | 3549 | 4155    | 3878              |
| Jowar        | -       | 2015-16 | Kharif    | 2667 | 1964   | 1610 | 1469       | 1223      | 1362           | -     | 1210   | 3940 | 1259    | 1807              |
| Linseed      | -       | 2015-16 | Rabi      | 4152 | -      | -    | 3490       | -         | -              | -     | -      | -    | 5550    | 3803              |
| Maize        | -       | 2015-16 | Kharif    | 1373 | 1751   | 1610 | 1407       | 1530      | 1410           | -     | 1676   | 1436 | 1458    | 1422              |
| Paddy        | -       | 2015-16 | Kharif    | -    | -      | -    | -          | -         | -              | -     | -      | -    | 1443    | 1662              |
| Potato       | -       | 2015-16 | Rabi      | 1280 | -      | 1060 | -          | 1066      | -              | -     | 988    | -    | -       | 939               |
| Rape/Mustard | -       | 2015-16 | Rabi      | 3717 | 3894   | 4014 | 7097       | 2839      | 3829           | 3958  | 3972   | 3843 | 3312    | 3826              |
| Rice         | -       | 2015-16 | Kharif    | 2382 | -      | -    | 2335       | 3440      | 3490           | -     | -      | -    | 2053    | 2274              |
| Sannhemp     | -       | 2015-16 | Kharif    | -    | -      | -    | -          | -         | -              | -     | -      | -    | 2444    | 2429              |
| Sesamum      | -       | 2015-16 | Kharif    | 6950 | 6924   | 7030 | 8582       | 10500     | 7620           | 8271  | 5862   | 6603 | 9822    | 7046              |
| Sugar Raw    | -       | 2015-16 | Rabi      | 3941 | -      | -    | -          | 2632      | -              | -     | -      | -    | 3935    | 3323              |
| Tur Arhar    | -       | 2015-16 | Rabi      | 8076 | -      | -    | -          | -         | 6923           | -     | 6585   | -    | -       | 6425              |
| Wheat        | -       | 2015-16 | Rabi      | 1522 | 1904   | 1906 | 1610       | 1626      | 1527           | 1725  | 1895   | 1511 | 1607    | 1596              |

**Table 2.25 Crop-wise District-wise Farm Harvest Prices of Principal Crops in India - Tamil Nadu**

(Rs.per Quintal)

| Crop Name  | Variety | Year    | Season \$ | Ariyalur | Coimbatore | Cuddalore | Dharmapuri | Dindugal | Erode | Kanchipuram | Kanyakumari | Karur | Krishnagiri | Madurai | State Wtd Average |
|------------|---------|---------|-----------|----------|------------|-----------|------------|----------|-------|-------------|-------------|-------|-------------|---------|-------------------|
| Arecanut   | -       | 2015-16 | -         | -        | 20688      | -         | 20688      | 20688    | 20688 | -           | 20688       | -     | 20688       | 20688   | 20861             |
| Banana     | -       | 2015-16 | -         | 3388     | 3388       | 2500      | 2836       | 1671     | 1682  | 2500        | 1269        | 2321  | 3388        | 2298    | 2403              |
| Cashewnut  | -       | 2015-16 | -         | 10860    | 10860      | 10860     | -          | 10860    | 10860 | 10860       | 10860       | 10860 | -           | 10860   | 10860             |
| CasterSeed | -       | 2015-16 | -         | 6746     | 3329       | 2334      | 3693       | 3892     | 3329  | -           | -           | 3329  | 6746        | 6746    | 4391              |
| Chilly     | -       | 2015-16 | -         | 10725    | 8025       | 13761     | 12516      | 9906     | 13043 | 11813       | -           | 8848  | 12514       | 9906    | 10858             |
| Cotton     | -       | 2015-16 | -         | 4700     | 4700       | 4279      | 4700       | 3874     | 4700  | 4279        | -           | 4700  | 4700        | 3874    | 4326              |
| Gram       | -       | 2015-16 | -         | -        | 6311       | -         | 5700       | 6190     | -     | 6017        | -           | -     | -           | 5683    | 5933              |
| Ground Nut | -       | 2015-16 | -         | 4000     | 4860       | 5668      | 4860       | 4771     | 6518  | 5668        | 4527        | 4000  | 4860        | 4771    | 5242              |
| Maize      | -       | 2015-16 | -         | 1612     | 1709       | 1843      | 1398       | 1495     | 2498  | 1989        | 1688        | 1746  | 2275        | 1602    | 1620              |
| Paddy      | -       | 2015-16 | -         | 1341     | 1318       | 1328      | 1318       | 1417     | 1318  | 1293        | 1439        | 1341  | 1318        | 1225    | 1333              |
| Potato     | -       | 2015-16 | -         | -        | -          | -         | -          | 1831     | 1831  | -           | -           | -     | 1794        | -       | 1828              |
| Ragi       | -       | 2015-16 | -         | 1913     | 2056       | 2245      | 1937       | 1670     | 2463  | 2161        | 2235        | 2506  | 2132        | 2115    | 2056              |
| Sesamum    | -       | 2015-16 | -         | 8973     | 7712       | 6180      | 8119       | 7116     | 7683  | 6180        | -           | 8973  | 8973        | 7116    | 7491              |
| Tapioca    | -       | 2015-16 | -         | 1053     | 2118       | 1543      | 1757       | 1053     | 1053  | 1543        | 1932        | 2118  | 1826        | 1053    | 1561              |
| Turmeric   | -       | 2015-16 | -         | 13447    | 10560      | 8000      | 12005      | 10673    | 8702  | -           | -           | 10061 | 13921       | 8000    | 10074             |

**Table 2.25 (Contd.) Crop-wise District-wise Farm Harvest Prices of Principal Crops in India - Tamil Nadu**

(Rs.per Quintal)

| Crop Name  | Variety | Year    | Season \$ | Nagapattinam | Namakkal | Nilgiris | Perambalur | Pudukkottai | Ramanathapuram | Salem | Sivaganga | Thanjavur | Theni | Thirunelveli | State Wtd Average |
|------------|---------|---------|-----------|--------------|----------|----------|------------|-------------|----------------|-------|-----------|-----------|-------|--------------|-------------------|
| Arecanut   | -       | 2015-16 | -         | -            | 22000    | 20688    | 20688      | -           | -              | 20688 | -         | 20688     | 20688 | 20688        | 20861             |
| Banana     | -       | 2015-16 | -         | 1831         | 2836     | 3388     | 3388       | 1928        | 3388           | 2836  | 1671      | 2148      | 3388  | 1452         | 2403              |
| Cashewnut  | -       | 2015-16 | -         | 10860        | 10860    | -        | -          | 10860       | 10860          | 10860 | 10860     | 10860     | 10860 | 10860        | 10860             |
| CasterSeed | -       | 2015-16 | -         | -            | 3693     | -        | 6746       | -           | -              | 3807  | -         | -         | 6746  | 3900         | 4391              |
| Chilly     | -       | 2015-16 | -         | 12314        | 11813    | -        | 8848       | 13445       | 8848           | 13147 | 8848      | 12314     | 9906  | 11587        | 10858             |
| Cotton     | -       | 2015-16 | -         | 4700         | 4700     | 3874     | 4700       | 3874        | 3874           | 4279  | 3874      | 4700      | 3874  | 3874         | 4326              |
| Gram       | -       | 2015-16 | -         | -            | 6900     | -        | -          | -           | 5641           | 5641  | -         | -         | 5641  | -            | 5933              |
| Ground Nut | -       | 2015-16 | -         | 5000         | 5213     | 4527     | 4000       | 4740        | 4771           | 5107  | 4771      | 5000      | 4771  | 4527         | 5242              |
| Maize      | -       | 2015-16 | -         | 1602         | 1538     | -        | 1612       | 1440        | 1575           | 1500  | 1575      | 1830      | 1679  | 1396         | 1620              |
| Paddy      | -       | 2015-16 | -         | 1270         | 1318     | 1439     | 1341       | 1428        | 1372           | 1318  | 1372      | 1383      | 1417  | 1372         | 1333              |
| Potato     | -       | 2015-16 | -         | -            | -        | 1831     | -          | -           | -              | -     | -         | -         | -     | -            | 1828              |
| Ragi       | -       | 2015-16 | -         | -            | 1991     | 2043     | 1913       | 2231        | 1670           | 1857  | 1838      | 2216      | 1670  | 1838         | 2056              |
| Sesamum    | -       | 2015-16 | -         | 8973         | 8119     | -        | 8973       | 8973        | 7116           | 8119  | 7116      | 8973      | 7116  | 7116         | 7491              |
| Tapioca    | -       | 2015-16 | -         | 1932         | 1543     | 1932     | 1053       | 1053        | 1932           | 1543  | 1053      | 1053      | 1053  | 1932         | 1561              |
| Turmeric   | -       | 2015-16 | -         | 12288        | 10531    | 8000     | 10531      | 12500       | -              | 9105  | 10883     | 12930     | 10723 | 10883        | 10074             |

**Table 2.25 (Contd.) Crop-wise District-wise Farm Harvest Prices of Principal Crops in India - Tamil Nadu**

(Rs.per Quintal)

| Crop Name  | Variety | Year    | Season \$ | Thiruvanna malai | Thiruvarur | Thoothukudi | Tiruchirappalli | Tiruppur | Tiruvallur | Vellore | Viluppuram | Virudhunagar | State Wtd Average |  |  |
|------------|---------|---------|-----------|------------------|------------|-------------|-----------------|----------|------------|---------|------------|--------------|-------------------|--|--|
| Arecanut   | -       | 2015-16 | -         | 20688            | 20688      | -           | 20688           | 20688    | -          | 20688   | 20688      | 20688        | 20861             |  |  |
| Banana     | -       | 2015-16 | -         | 3388             | 2148       | 1967        | 2373            | 3388     | 2500       | 2540    | 2500       | 3000         | 2403              |  |  |
| Cashewnut  | -       | 2015-16 | -         | -                | 10860      | 10860       | 10860           | 10860    | 10860      | 10860   | 10860      | 10860        | 10860             |  |  |
| CasterSeed | -       | 2015-16 | -         | 2334             | -          | 3382        | 3329            | 3329     | 2334       | 2334    | 2334       | -            | 4391              |  |  |
| Chilly     | -       | 2015-16 | -         | 11813            | -          | 11446       | 13097           | 13256    | 11813      | 11813   | 12814      | 9165         | 10858             |  |  |
| Cotton     | -       | 2015-16 | -         | 4279             | 4700       | 3874        | 4700            | 4700     | 4279       | 4279    | 4279       | 3874         | 4326              |  |  |
| Gram       | -       | 2015-16 | -         | 5641             | -          | 6642        | 6157            | 5751     | 5641       | 5688    | -          | 5641         | 5933              |  |  |
| Ground Nut | -       | 2015-16 | -         | 5648             | 5000       | 4527        | 4740            | 6518     | 5668       | 5648    | 4860       | 4771         | 5242              |  |  |
| Maize      | -       | 2015-16 | -         | 1340             | -          | 1625        | 1612            | 1658     | 1989       | 1496    | 1649       | 1575         | 1620              |  |  |
| Paddy      | -       | 2015-16 | -         | 1318             | 1297       | 1439        | 1341            | 1318     | 1293       | 1318    | 1318       | 1372         | 1333              |  |  |
| Potato     | -       | 2015-16 | -         | -                | -          | -           | -               | 1831     | -          | -       | -          | -            | 1828              |  |  |
| Ragi       | -       | 2015-16 | -         | 2232             | -          | 2043        | 1913            | -        | 2161       | 1964    | 1792       | 1799         | 2056              |  |  |
| Sesamum    | -       | 2015-16 | -         | 8119             | 8973       | 7116        | 8973            | 7511     | 6180       | 6180    | 6180       | 7116         | 7491              |  |  |
| Tapioca    | -       | 2015-16 | -         | 1543             | 1932       | 1932        | 1757            | 2118     | 1543       | 1543    | 1543       | 1932         | 1561              |  |  |
| Turmeric   | -       | 2015-16 | -         | 10531            | -          | 12365       | 11943           | 10091    | 10531      | 10531   | 11884      | 10883        | 10074             |  |  |



**Table 2.26 Crop-wise District-wise Farm Harvest Prices of Principal Crops in India - Telangana**

(Rs.per Quintal)

| Crop Name  | Variety | Year    | Season \$ | Telangana | Adilabad | Karimnagar | Khammam | Mahabubnagar | Medak | Nalgonda | Nizamabad | Rangareddy | Warangal | State Wtd Average |       |      |
|------------|---------|---------|-----------|-----------|----------|------------|---------|--------------|-------|----------|-----------|------------|----------|-------------------|-------|------|
| Bajra      | -       | 2015-16 | -         | 1539      | -        | -          | -       | -            | -     | -        | -         | -          | -        | 1539              |       |      |
|            |         |         | Kharif    | -         | -        | -          | -       | 1807         | -     | 1919     | -         | -          | -        | -                 | 1863  |      |
|            |         |         | Rabi      | -         | 1350     | -          | -       | -            | -     | -        | -         | 1518       | -        | -                 | -     | 1434 |
| CasterSeed | -       | 2015-16 | -         | 3286      | -        | -          | -       | -            | -     | -        | -         | -          | -        | 3286              |       |      |
|            |         |         | Kharif    | -         | -        | -          | -       | 3287         | -     | 3290     | -         | -          | -        | 2989              | 3189  |      |
| Chilly     | Dry     | 2015-16 | -         | 10343     | -        | -          | -       | -            | -     | -        | -         | -          | -        | 10343             |       |      |
|            |         |         | Kharif    | -         | 9968     | 12461      | 10107   | 5019         | -     | -        | -         | -          | -        | 11156             | 9742  |      |
|            |         |         | Rabi      | -         | -        | 12461      | 13971   | -            | -     | 11338    | -         | -          | -        | 11670             | 12360 |      |
| Cotton     | -       | 2015-16 | -         | 3932      | -        | -          | -       | -            | -     | -        | -         | -          | -        | 3932              |       |      |
|            |         |         | Kharif    | -         | 3982     | 3980       | 3796    | 3973         | 3861  | 3973     | 4106      | 3861       | 3921     | 3939              |       |      |
|            |         |         | Rabi      | -         | -        | -          | -       | -            | 3861  | -        | -         | -          | -        | -                 | 3861  |      |
| Gram       | -       | 2015-16 | -         | 4489      | -        | -          | -       | -            | -     | -        | -         | -          | -        | 4489              |       |      |
|            |         |         | Rabi      | -         | 4580     | 4066       | -       | 4357         | 4066  | -        | 4580      | 4536       | 5043     | 4461              |       |      |
| Ground Nut | -       | 2015-16 | -         | 4544      | -        | -          | -       | -            | -     | -        | -         | -          | -        | 4544              |       |      |
|            |         |         | Kharif    | -         | -        | -          | 8750    | 4222         | -     | 4371     | -         | -          | -        | 3980              | 5331  |      |
|            |         |         | Rabi      | -         | 4956     | 5007       | 5777    | 4322         | 4889  | 5124     | 4956      | 4889       | 4515     | 4937              |       |      |
| Jowar      | -       | 2015-16 | -         | 2092      | -        | -          | -       | -            | -     | -        | -         | -          | -        | 2092              |       |      |
|            |         |         | Kharif    | -         | 1819     | -          | -       | 1879         | 2623  | 2218     | 1820      | 2558       | -        | 2057              |       |      |
|            |         |         | Rabi      | -         | 1819     | -          | -       | 2143         | 2623  | 3180     | 1820      | 2623       | 2550     | 2394              |       |      |
| Maize      | -       | 2015-16 | -         | 1367      | -        | -          | -       | -            | -     | -        | -         | -          | -        | 1367              |       |      |
|            |         |         | Kharif    | -         | 1369     | 1343       | 1526    | 1348         | 1448  | 2206     | 1369      | 1448       | 1215     | 1475              |       |      |
|            |         |         | Rabi      | -         | 1309     | 1388       | 1284    | 1314         | 1306  | -        | 1309      | 1306       | 1376     | 1324              |       |      |
| Paddy      | -       | 2015-16 | -         | -         | 1347     | 1404       | 1489    | 1428         | 1428  | 1429     | 1503      | 1494       | 1424     | 1439              |       |      |
|            |         |         | Kharif    | -         | 1289     | 1358       | 1606    | 1380         | 1407  | 1485     | 1644      | 1273       | 1399     | 1427              |       |      |
|            |         |         | Rabi      | -         | 1404     | 1449       | 1371    | 1476         | 1449  | 1372     | 1362      | 1715       | 1449     | 1450              |       |      |
| Ragi       | -       | 2015-16 | -         | 1644      | -        | -          | -       | -            | -     | -        | -         | -          | -        | 1644              |       |      |
|            |         |         | Kharif    | -         | -        | -          | -       | 1756         | -     | -        | -         | -          | 1472     | -                 | 1614  |      |
|            |         |         | Rabi      | -         | -        | -          | -       | -            | -     | -        | -         | -          | 1678     | -                 | 1678  |      |
| Sesamum    | -       | 2015-16 | -         | 6711      | -        | -          | -       | -            | -     | -        | -         | -          | -        | 6711              |       |      |
|            |         |         | Kharif    | -         | -        | -          | -       | -            | -     | 6545     | -         | -          | -        | 7936              | 7241  |      |
|            |         |         | Rabi      | -         | 6695     | 6695       | -       | -            | -     | -        | 6695      | -          | -        | -                 | 6695  |      |
| Sugar Raw  | -       | 2015-16 | -         | 3164      | -        | -          | -       | -            | -     | -        | -         | -          | -        | 3164              |       |      |
|            |         |         | Kharif    | -         | -        | 2900       | 3100    | 2900         | 3250  | 2900     | 3200      | 3000       | -        | 3036              |       |      |
| Tobacco    | -       | 2015-16 | -         | 14275     | -        | -          | -       | -            | -     | -        | -         | -          | -        | 14275             |       |      |
|            |         |         | Kharif    | -         | -        | -          | -       | 14275        | -     | -        | 14275     | -          | -        | 14275             |       |      |
|            |         |         | Rabi      | -         | -        | -          | 14275   | 14275        | -     | -        | 14275     | -          | -        | 14275             |       |      |

**Table 2.26 (Contd.) Crop-wise District-wise Farm Harvest Prices of Principal Crops in India - Telangana**

(Rs.per Quintal)

| Crop Name | Variety | Year    | Season \$ | Telangana | Adilabad | Karimnagar | Khammam | Mahabubnagar | Medak | Nalgonda | Nizamabad | Rangareddy | Warangal | State Wtd Average |      |  |
|-----------|---------|---------|-----------|-----------|----------|------------|---------|--------------|-------|----------|-----------|------------|----------|-------------------|------|--|
| Tur Arhar | -       | 2015-16 | -         | 8609      | -        | -          | -       | -            | -     | -        | -         | -          | -        | 8609              |      |  |
|           |         |         | Kharif    | 8615      | -        | -          | -       | -            | -     | -        | -         | -          | -        | -                 | 8615 |  |
|           |         |         | Rabi      | -         | 7405     | 7293       | -       | -            | -     | -        | -         | -          | -        | 7997              | 7565 |  |
| Turmeric  | -       | 2015-16 | -         | 7914      | -        | -          | -       | -            | -     | -        | -         | -          | -        | 7914              |      |  |
|           |         |         | Kharif    | -         | 7578     | 8058       | -       | -            | 8058  | -        | 7578      | 8058       | 8292     | 7937              |      |  |

**Table 2.27 Crop-wise District-wise Farm Harvest Prices of Principal Crops in India - Tripura**

(Rs.per Quintal)

| Crop Name    | Variety | Year    | Season \$ | Tripura | State Wtd Average |  |  |  |  |  |  |  |  |  |  |
|--------------|---------|---------|-----------|---------|-------------------|--|--|--|--|--|--|--|--|--|--|
| Cotton       | -       | 2015-16 | -         | 4400    | 4400              |  |  |  |  |  |  |  |  |  |  |
| Gram         | -       | 2015-16 | -         | 7615    | 7615              |  |  |  |  |  |  |  |  |  |  |
| Jute         | -       | 2015-16 | -         | 2985    | 2985              |  |  |  |  |  |  |  |  |  |  |
| Maize        | -       | 2015-16 | -         | 2637    | 2637              |  |  |  |  |  |  |  |  |  |  |
| Paddy        | -       | 2015-16 | -         | 1399    | 1399              |  |  |  |  |  |  |  |  |  |  |
| Potato       | -       | 2015-16 | -         | 968     | 968               |  |  |  |  |  |  |  |  |  |  |
| Rape/Mustard | -       | 2015-16 | -         | 6589    | 6589              |  |  |  |  |  |  |  |  |  |  |
| Sesamum      | -       | 2015-16 | -         | 6738    | 6738              |  |  |  |  |  |  |  |  |  |  |

**Table 2.28 Crop-wise District-wise Farm Harvest Prices of Principal Crops in India - Uttar Pradesh**

(Rs.per Quintal)

| Crop Name    | Variety | Year    | Season \$ | Agra | Azamgarh | Bagpat | Bahraich | Balrampur | Banda | Basti | Bijnor | Chitrakoot | Etah | Farrukhabad | State Wtd Average |
|--------------|---------|---------|-----------|------|----------|--------|----------|-----------|-------|-------|--------|------------|------|-------------|-------------------|
| Bajra        | -       | 2015-16 | Kharif    | -    | 3500     | -      | -        | -         | 1400  | 1425  | 1208   | 1300       | 1159 | -           | 1417              |
| Barley       | -       | 2015-16 | Rabi      | -    | 1445     | 1621   | -        | -         | 1398  | -     | -      | -          | 1394 | -           | 1384              |
| Cotton       | -       | 2015-16 | Kharif    | 4635 | 6500     | -      | -        | -         | -     | -     | -      | -          | -    | -           | 5568              |
| Gram         | -       | 2015-16 | Rabi      | -    | 4113     | -      | -        | 5695      | 6128  | -     | -      | -          | 4681 | -           | 5603              |
| Ground Nut   | -       | 2015-16 | Kharif    | -    | -        | -      | -        | -         | 4500  | -     | -      | -          | -    | -           | 6162              |
| Jowar        | -       | 2015-16 | Kharif    | 1240 | 1000     | -      | -        | -         | 2450  | 1120  | 1560   | 2000       | -    | -           | 1426              |
| Linseed      | -       | 2015-16 | Rabi      | -    | -        | -      | -        | -         | 6030  | -     | -      | 5399       | -    | -           | 4238              |
| Maize        | -       | 2015-16 | Kharif    | 1170 | 1480     | -      | 1180     | 1298      | -     | 1081  | 1200   | -          | 1265 | -           | 1211              |
| Paddy        | -       | 2015-16 | Kharif    | 1560 | 1330     | 1650   | 1270     | 1120      | 1420  | 1250  | 1300   | 1600       | 1580 | -           | 1317              |
| Potato       | -       | 2015-16 | Rabi      | 799  | -        | -      | -        | -         | -     | -     | -      | -          | -    | 436         | 688               |
| Rape/Mustard | -       | 2015-16 | Rabi      | 3480 | -        | -      | -        | 3579      | -     | -     | -      | -          | 3519 | -           | 3623              |
| Sesamum      | -       | 2015-16 | Kharif    | -    | -        | -      | -        | -         | 6000  | -     | -      | 7000       | 7189 | -           | 6365              |
| Soyabean     | -       | 2015-16 | Kharif    | -    | -        | -      | -        | -         | -     | -     | -      | -          | -    | -           | 2640              |
| Sugar Raw    | -       | 2015-16 | Kharif    | -    | -        | 2544   | -        | 3212      | -     | 3500  | 2705   | -          | -    | -           | 2955              |
| Sugarcane    | -       | 2015-16 | Kharif    | -    | -        | 280    | -        | 256       | -     | 230   | 240    | -          | -    | -           | 248               |
| Tobacco      | -       | 2015-16 | Rabi      | -    | -        | -      | -        | -         | -     | -     | -      | -          | 5236 | -           | 3732              |
| Turmeric     | -       | 2015-16 | Rabi      | -    | -        | -      | 1094     | -         | -     | -     | -      | -          | -    | -           | 3354              |
| Wheat        | -       | 2015-16 | Rabi      | 1528 | 1413     | 1582   | 1434     | 1515      | 1527  | 1456  | 1568   | 1403       | 1553 | -           | 1438              |

**Table 2.28 (Contd.) Crop-wise District-wise Farm Harvest Prices of Principal Crops in India - Uttar Pradesh**

(Rs.per Quintal)

| Crop Name    | Variety | Year    | Season \$ | Fatehpur | Firozabad | Gautam Budha Nagar | Ghazipur | Gonda | Hamirpur | Hardoi | Hathras (M.M.Nagar) | Jhansi | Kannauj | Kaushambi | State Wtd Average |
|--------------|---------|---------|-----------|----------|-----------|--------------------|----------|-------|----------|--------|---------------------|--------|---------|-----------|-------------------|
| Bajra        | -       | 2015-16 | Kharif    | 1192     | -         | -                  | -        | -     | -        | -      | -                   | 1210   | -       | 1300      | 1417              |
| Barley       | -       | 2015-16 | Rabi      | 1505     | 1341      | -                  | 1533     | -     | -        | -      | -                   | -      | -       | 1899      | 1384              |
| Cotton       | -       | 2015-16 | Kharif    | -        | -         | -                  | -        | -     | -        | -      | -                   | -      | -       | -         | 5568              |
| Gram         | -       | 2015-16 | Rabi      | 6466     | -         | -                  | 6315     | 5444  | 5079     | -      | -                   | -      | -       | 7640      | 5603              |
| Ground Nut   | -       | 2015-16 | Kharif    | -        | -         | -                  | -        | -     | -        | -      | -                   | -      | -       | -         | 6162              |
| Jowar        | -       | 2015-16 | Kharif    | 1480     | -         | -                  | 1021     | -     | 2100     | 1255   | -                   | 1420   | -       | -         | 1426              |
| Linseed      | -       | 2015-16 | Rabi      | -        | -         | -                  | -        | -     | -        | -      | -                   | -      | -       | -         | 4238              |
| Maize        | -       | 2015-16 | Kharif    | -        | -         | -                  | -        | -     | -        | 1152   | -                   | -      | -       | -         | 1211              |
| Paddy        | -       | 2015-16 | Kharif    | 1150     | -         | 1850               | 1303     | -     | -        | 1280   | -                   | 1140   | -       | 1260      | 1317              |
| Potato       | -       | 2015-16 | Rabi      | 1069     | -         | -                  | 674      | -     | -        | 746    | 807                 | -      | 428     | 1208      | 688               |
| Rape/Mustard | -       | 2015-16 | Rabi      | 4435     | -         | -                  | -        | 3309  | 3578     | -      | -                   | -      | -       | -         | 3623              |
| Sesamum      | -       | 2015-16 | Kharif    | 5864     | -         | -                  | -        | -     | 6200     | 7200   | -                   | -      | -       | -         | 6365              |
| Soyabean     | -       | 2015-16 | Kharif    | -        | -         | -                  | -        | -     | -        | -      | -                   | 2640   | -       | -         | 2640              |
| Sugar Raw    | -       | 2015-16 | Kharif    | -        | -         | -                  | -        | 3140  | -        | 2800   | -                   | -      | -       | -         | 2955              |
| Sugarcane    | -       | 2015-16 | Kharif    | -        | -         | -                  | -        | 285   | -        | 245    | -                   | -      | -       | -         | 248               |
| Tobacco      | -       | 2015-16 | Rabi      | -        | -         | -                  | -        | -     | -        | 2982   | -                   | -      | -       | -         | 3732              |
| Turmeric     | -       | 2015-16 | Rabi      | -        | -         | -                  | -        | -     | -        | -      | -                   | -      | -       | -         | 3354              |
| Wheat        | -       | 2015-16 | Rabi      | 1261     | -         | 1672               | 1539     | 1409  | 1482     | 1184   | -                   | -      | -       | 1546      | 1438              |

**Table 2.28 (Contd.) Crop-wise District-wise Farm Harvest Prices of Principal Crops in India - Uttar Pradesh**

(Rs.per Quintal)

| Crop Name    | Variety | Year    | Season \$ | Lalitpur | Mahoba | Mainpuri | Mathura | Mirzapur | Moradabad | Sant Kabir Nagar | Shrawasti | Siddharthnagar | Sitapur | Sonbhadra | State Wtd Average |
|--------------|---------|---------|-----------|----------|--------|----------|---------|----------|-----------|------------------|-----------|----------------|---------|-----------|-------------------|
| Bajra        | -       | 2015-16 | Kharif    | -        | -      | -        | -       | 1130     | -         | 1200             | -         | -              | -       | -         | 1417              |
| Barley       | -       | 2015-16 | Rabi      | 1191     | 1487   | -        | 1432    | 1293     | -         | -                | -         | -              | -       | -         | 1384              |
| Cotton       | -       | 2015-16 | Kharif    | -        | -      | -        | -       | -        | -         | -                | -         | -              | -       | -         | 5568              |
| Gram         | -       | 2015-16 | Rabi      | 4529     | -      | -        | -       | 4711     | -         | -                | -         | -              | -       | -         | 5603              |
| Ground Nut   | -       | 2015-16 | Kharif    | 4250     | -      | -        | -       | 12100    | -         | -                | -         | -              | 3800    | -         | 6162              |
| Jowar        | -       | 2015-16 | Kharif    | -        | -      | -        | -       | 1000     | -         | 1140             | -         | -              | 1180    | -         | 1426              |
| Linseed      | -       | 2015-16 | Rabi      | -        | 5510   | -        | -       | 3741     | -         | -                | -         | 2790           | -       | 4197      | 4238              |
| Maize        | -       | 2015-16 | Kharif    | 1190     | -      | -        | -       | -        | -         | 1330             | 1050      | -              | 1255    | 1092      | 1211              |
| Paddy        | -       | 2015-16 | Kharif    | -        | -      | -        | -       | 1300     | 1266      | 1300             | 1080      | 1130           | 1080    | -         | 1317              |
| Potato       | -       | 2015-16 | Rabi      | -        | -      | 726      | -       | -        | -         | -                | -         | -              | 745     | -         | 688               |
| Rape/Mustard | -       | 2015-16 | Rabi      | 2970     | 3957   | 3523     | -       | 7315     | 3157      | -                | 4505      | -              | -       | 3821      | 3623              |
| Sesamum      | -       | 2015-16 | Kharif    | 5200     | 5500   | -        | -       | -        | -         | -                | -         | -              | 7450    | 6050      | 6365              |
| Soyabean     | -       | 2015-16 | Kharif    | -        | -      | -        | -       | -        | -         | -                | -         | -              | -       | -         | 2640              |
| Sugar Raw    | -       | 2015-16 | Kharif    | -        | -      | -        | -       | -        | -         | 2755             | -         | -              | 2950    | -         | 2955              |
| Sugarcane    | -       | 2015-16 | Kharif    | -        | -      | -        | -       | -        | -         | 270              | -         | -              | 240     | -         | 248               |
| Tobacco      | -       | 2015-16 | Rabi      | -        | -      | -        | -       | -        | -         | -                | -         | -              | 2978    | -         | 3732              |
| Turmeric     | -       | 2015-16 | Rabi      | -        | -      | -        | -       | -        | -         | -                | -         | -              | 3580    | -         | 3354              |
| Wheat        | -       | 2015-16 | Rabi      | 1394     | 1589   | 1458     | 1499    | 1426     | 1505      | 1438             | 1563      | 1459           | 1374    | 1426      | 1438              |

**Table 2.29 Crop-wise District-wise Farm Harvest Prices of Principal Crops in India - Uttranchal**

(Rs.per Quintal)

| Crop Name    | Variety | Year    | Season \$ | Dehradoon | Haridwar | Nanital | Udamsingh nagar | State Wtd Average |  |  |  |  |  |  |  |
|--------------|---------|---------|-----------|-----------|----------|---------|-----------------|-------------------|--|--|--|--|--|--|--|
| Barley       | -       | 2015-16 | Rabi      | 1561      | -        | -       | -               | 1561              |  |  |  |  |  |  |  |
| Ground Nut   | -       | 2015-16 | Kharif    | -         | 5375     | -       | -               | 5375              |  |  |  |  |  |  |  |
| Maize        | -       | 2015-16 | Kharif    | -         | 1551     | 1227    | 1405            | 1495              |  |  |  |  |  |  |  |
| Paddy        | -       | 2015-16 | Kharif    | -         | 2138     | 1253    | 1305            | 1390              |  |  |  |  |  |  |  |
| Ragi         | -       | 2015-16 | Kharif    | 2964      | -        | -       | -               | 2964              |  |  |  |  |  |  |  |
| Rape/Mustard | -       | 2015-16 | Rabi      | -         | -        | 3446    | 3544            | 3495              |  |  |  |  |  |  |  |
| Sesamum      | -       | 2015-16 | Kharif    | -         | 7381     | -       | -               | 7381              |  |  |  |  |  |  |  |
| Soyabean     | -       | 2015-16 | Kharif    | -         | -        | 3379    | -               | 3379              |  |  |  |  |  |  |  |
| Sugar Raw    | -       | 2015-16 | Kharif    | -         | 3164     | 3221    | 4182            | 3522              |  |  |  |  |  |  |  |
| Sugarcane    | -       | 2015-16 | Kharif    | -         | 288      | 276     | 282             | 286               |  |  |  |  |  |  |  |
| Wheat        | -       | 2015-16 | Rabi      | 1568      | 1598     | 1775    | 1577            | 1629              |  |  |  |  |  |  |  |

**Table 2.30 Crop-wise District-wise Farm Harvest Prices of Principal Crops in India - West Bengal**

(Rs.per Quintal)

| Crop Name    | Variety | Year    | Season \$ | Bardhaman | Birbhum | Dakhin Dinajpur | Darjiling | East Midnapore | Hooghly | Howrah | Malda | Murshidabad | Nadia | North 24 Parganas | State Wtd Average |
|--------------|---------|---------|-----------|-----------|---------|-----------------|-----------|----------------|---------|--------|-------|-------------|-------|-------------------|-------------------|
| Gram         | -       | 2015-16 | -         | 5450      | -       | 5820            | -         | -              | -       | -      | 6376  | 4789        | -     | 6100              | 5511              |
| Jute         | -       | 2015-16 | -         | 2375      | -       | 4880            | -         | -              | 3060    | 2250   | 5457  | 3436        | 5600  | -                 | 4448              |
| Paddy        | -       | 2015-16 | -         | 1400      | 1250    | 1505            | 1500      | -              | 1140    | 1450   | 1550  | 1560        | 1650  | 1800              | 1526              |
| Potato       | -       | 2015-16 | -         | 1450      | 1250    | 1449            | 1296      | -              | -       | 1192   | 1470  | 1533        | 1558  | 1565              | 1296              |
| Rape/Mustard | -       | 2015-16 | -         | 4800      | 4800    | 4641            | 3391      | -              | -       | -      | 4290  | 3611        | 4250  | 3967              | 4147              |
| Wheat        | -       | 2015-16 | -         | 1650      | 1625    | 1680            | 1720      | 1700           | -       | -      | 1643  | 1750        | -     | -                 | 1690              |



**Table 2.30 (Contd.) Crop-wise District-wise Farm Harvest Prices of Principal Crops in India - West Bengal**

(Rs.per Quintal)

| Crop Name    | Variety | Year    | Season \$ | Puruliya | South 24 Parganas | West Midnapore | State Wtd Average |  |  |  |  |  |  |  |  |
|--------------|---------|---------|-----------|----------|-------------------|----------------|-------------------|--|--|--|--|--|--|--|--|
| Gram         | -       | 2015-16 | -         | -        | -                 | -              | 5511              |  |  |  |  |  |  |  |  |
| Jute         | -       | 2015-16 | -         | -        | -                 | -              | 4448              |  |  |  |  |  |  |  |  |
| Paddy        | -       | 2015-16 | -         | 1260     | 1780              | 1775           | 1526              |  |  |  |  |  |  |  |  |
| Potato       | -       | 2015-16 | -         | -        | 1500              | 975            | 1296              |  |  |  |  |  |  |  |  |
| Rape/Mustard | -       | 2015-16 | -         | -        | 4533              | 4500           | 4147              |  |  |  |  |  |  |  |  |
| Wheat        | -       | 2015-16 | -         | -        | -                 | -              | 1690              |  |  |  |  |  |  |  |  |

\* State Weighted Average Provided by State Authority. \$ The icon (-) is given wherever state has not mentioned specific season.

# ***APPENDICES***

**METHODOLOGY FOR COLLECTION OF FARM HARVEST PRICES**

1. Farm Harvest prices of a commodity as reported in this publication is defined as the average wholesale price, at which the commodity is disposed of by the producer to the trader at the village site during the specified marketing period after the commencement of harvest.
2. The information on Farm Harvest Prices is provided by State Governments and the following procedure is followed by them for systematising the collection and compilation of these statistics:-
  - a) A certain number of representative villages are selected in each district at the rate of one, two or three villages from each Tehsil, depending upon the extent to which the crop is grown in the Tehsil. The total number of villages to be selected in each district should, however, not be less than ten.
  - b) In each selected village, the price at which the commodity is sold by the producer is recorded in the specified form (p.82), by the price reporter on every Friday during the peak period of marketing after the commencement of the harvesting season. If no sales take place on that Friday, the price at which the commodity was sold last during the week is recorded instead.
  - c) In cases, where village site transactions do not take place, the price reported relate to what the farmer receives for his produce, and is obtained by subtracting transport and other marketing charges from the wholesale prices quoted at the mandi where produce is disposed of.
  - d) The price recorded is the wholesale price of the specified variety of the commodity and is expressed in terms of Rupees and paise per quintal (net weight) exclusive of gunny bags / container.
3. The existence of different varieties and qualities of commodities with a wide variation in prices makes the task of giving a single harvest price for a commodity for the State as a whole difficult. In each district, however, it may be possible to determine a particular variety which is grown to the largest extent, and that variety is specified for the purpose of noting the farm harvest prices. In some cases, it may be necessary to give the farm harvest prices of two varieties separately if the difference in price is large, as for instance, in the case of prices of Bt Cotton and Desi cotton.
4. It is also necessary to fix the reference period of harvest and the subsequent peak period of marketing for each crop, as these tend to vary widely depending upon the variety of the crop and the nature of cultivation. In some cases, it is even difficult to define strictly the harvesting period, as for instance, in the case of cotton where there are more than four pickings in a year.

These periods, however, are fixed in respect of each-crop and each State by the State Governments having due regard to the local conditions. Usually, in case of most commodities, six to eight weeks during the peak period of marketing after the commencement of the harvest season is taken to be the period during which farmers are generally expected to dispose of their produce.

5. Data on farm harvest prices are viewed as an integral part of agricultural statistics. They need to be collected through the same agency employed for the collection of statistics of area and yield. The Supervisors, Kanungos, Revenue Inspectors or the equivalent officials, who are generally employed by the state government for the collection of statistics of area and yield are also entrusted with the task of collecting these statistics. However, in view of the wide divergences in the revenue machinery of different States, the choice of the reporting agency is left to the decision of the State Government. The price reporters are required to visit the selected villages on the appointed dates, enquire personally the prices at which the commodity has been sold by the farmer and record them in the specified form.

6. The method of arriving at the average price of a commodity for the State as a whole is the method of weighted average, with the district production figures for the concerned year as weights. However, the average price for the district for each week may be obtained as a simple arithmetic average of the Tehsil prices which in turn, are the simple arithmetic average of village prices. The average price for the season is the simple arithmetic average of the district prices for each commodity. The computation of the district average price is done at the district headquarters while the prices for the State as a whole is worked out at State headquarters.

7. The farm harvest prices are required to be collected in respect of all the important crops and, in any case, they are required to be submitted for all the crops which come under the purview of advance estimation. As the final estimate of every crop is published at least one month after the completion of harvesting, it may be feasible to get the farm harvest prices ready by the time of the final estimate.

**FORM**

VILLAGE:

CIRCLE:

TALUKA:

DISTRICT:

PRICE PREVAILING ON .....

| COMMODITY | QUALITY | WHOLESALE PRICE<br>(RS. PER QUINTAL) |
|-----------|---------|--------------------------------------|
| 1.        |         |                                      |
| 2.        |         |                                      |
| 3.        |         |                                      |

NAME OF THE REPORTER:

DUE DATE:

DESIGNATION:

DATE OF DESPATCH:

REASON FOR DELAY:

DATE OF RECEIPT:

SIGNATURE OF REPORTER:

DEPTT. HEADQUARTERS:

### Harvesting Season of Principal Crops in Major Growing States

| STATE            | PADDY/RICE<br>(KHARIF) | PADDY/RICE<br>(RABI) | PADDY/RICE<br>(SUMMER) |
|------------------|------------------------|----------------------|------------------------|
| Andhra Pradesh   | Nov - Dec              | Mar - Apr            | Jul – Aug              |
| Assam            | Jun - Jul              | Nov - Dec            | May- Jun               |
| Bihar            | Sep - Nov              | Apr - May            | Jul – Aug              |
| Gujarat          | Oct - Nov              |                      |                        |
| Haryana          | Sep - Oct              |                      |                        |
| Himachal Pradesh | Oct                    |                      |                        |
| Jammu & Kashmir  | Sep - Oct              |                      |                        |
| Karnataka        | Sep - Oct              | Jan - Feb            | May – Jun              |
| Kerala           | Sep - Oct              | Dec -Jan             | Mar – Apr              |
| Madhya Pradesh   | Oct - Nov              |                      |                        |
| Maharashtra      | Oct - Nov              |                      |                        |
| Meghalaya        |                        |                      |                        |
| Nagaland         |                        |                      |                        |
| Odisha           | Sep - Oct              | Nov -Dec             | Apr – May              |
| Punjab           | Oct - Nov              |                      |                        |
| Rajasthan        | Oct - Nov              |                      |                        |
| Tamilnadu        | Sep - Oct              | Jan - Feb            | May – Jun              |
| Telangana        | Nov -Dec               | Mar – Apr            |                        |
| Uttar Pradesh    | Oct - Nov              | Apr – May            |                        |
| Uttarakhand      |                        |                      |                        |
| West Bengal      | Aug - Nov              |                      | Apr – May              |
| ALL - INDIA      | Sep - Jan              | Apr – May            | Mar - Aug              |

**APPENDIX-II (CONTD.)**

**Harvesting Season of Principal Crops in Major Growing States**

| <b>STATE</b>     | <b>BAJRA<br/>(KHARIF)</b> | <b>BAJRA<br/>(SUMMER)</b> | <b>WHEAT<br/>(RABI)</b> |
|------------------|---------------------------|---------------------------|-------------------------|
| Andhra Pradesh   | Sep – Oct                 |                           |                         |
| Assam            |                           |                           | Mar(E) - Apr(E)         |
| Bihar            |                           |                           | Mar(E) - Apr(E)         |
| Gujarat          | Jun(M) - Jul(M)           | May(M) - Jun(E)           | Feb(E) - Mar(E)         |
| Haryana          | Sep(E) - Sep(L)           |                           | Apr(B) - May(B)         |
| Himachal Pradesh |                           |                           | Apr (M) - Jun(E)        |
| Jammu & Kashmir  |                           |                           | Apr (E) - Jun(E)        |
| Karnataka        | Sep(L) - Oct(M)           | Apr(L) - May(E)           | Feb(B) - Mar(E)         |
| Kerala           |                           |                           |                         |
| Madhya Pradesh   | Oct(E) - Oct(L)           | Jun(E) – Jun(M)           | Feb (E) – Apr(M)        |
| Maharashtra      | Sep(L) - Oct(E)           | May(E) – May(M)           | Feb(B) – Mar(E)         |
| Meghalaya        |                           |                           |                         |
| Nagaland         |                           |                           |                         |
| Odisha           |                           |                           | Mar - Apr               |
| Punjab           | Oct(M) – Oct (L)          |                           | Apr(M) -May(B)          |
| Rajasthan        | Sep(L) - Oct(M)           | May(L) – Jun(M)           | Mar(B) - Apr(E)         |
| Tamilnadu        | Sep(M) – Oct(M)           | May(M) - Jun(M)           |                         |
| Telangana        | Jul – Aug                 |                           |                         |
| Uttar Pradesh    | Oct(E) - Oct(M)           | May(L) - Jun(E)           | Mar(M) - Apr(E)         |
| Uttarakhand      |                           |                           |                         |
| West Bengal      |                           |                           | Mar(B) - Apr(B)         |
| ALL - INDIA      | Sep - Nov                 | Apr – May                 | Feb - Jun               |

**APPENDIX-II (CONTD.)**

**Harvesting Season of Principal Crops in Major Growing States**

| <b>STATE</b>     | <b>ARHAR / TUR<br/>(Early Duration)</b> | <b>ARHAR / TUR<br/>(Mid Early Duration)</b> |
|------------------|-----------------------------------------|---------------------------------------------|
| Andhra Pradesh   | Nov(M) - Nov(E)                         | Dec(M) - Dec(E)                             |
| Assam            |                                         |                                             |
| Bihar            | Nov (B) - Nov(M)                        |                                             |
| Chattisgarh      | Nov(B) - Nov(M)                         |                                             |
| Gujarat          | Nov(M) - Nov(E)                         | Dec(M) - Dec (E)                            |
| Haryana          | Oct (M) – Oct(E)                        |                                             |
| Himachal Pradesh |                                         |                                             |
| Jammu & Kashmir  |                                         |                                             |
| Karnataka        | Nov(M) - Nov(E)                         | Dec(M) - Dec(E)                             |
| Kerala           |                                         |                                             |
| Madhya Pradesh   | Nov (M)                                 | Nov(E ) - Dec(E)                            |
| Maharashtra      | Nov(M) - Nov(E)                         | Dec(M) - Dec(E)                             |
| Meghalaya        |                                         |                                             |
| Manipur          |                                         |                                             |
| Nagaland         | Nov(B) - Nov(M)                         |                                             |
| Odisha           | Nov(M) - Nov(E)                         |                                             |
| Punjab           | Oct (M) – Oct (E)                       |                                             |
| Jharkhand        | Nov(M) - Nov(E)                         |                                             |
| Rajasthan        | Nov(B) - Nov(M)                         |                                             |
| Tamilnadu        | Nov(B) - Nov(M)                         | Dec(M) - Dec (E)                            |
| Tripura          | Nov(B) - Nov(M)                         |                                             |
| Uttar Pradesh    | Nov(B) - Nov(M)                         |                                             |
| Uttarakhand      | Nov(M) - Nov(E)                         |                                             |
| ALL - INDIA      | Nov(B) - Nov(M)                         | Nov(M) - Dec (E)                            |



### Harvesting Season of Principal Crops in Major Growing States

| STATE            | ARHAR / TUR<br>(Medium<br>Duration) | ARHAR / TUR<br>(Long Duration) | SOYABEAN<br>(KHARIF) |
|------------------|-------------------------------------|--------------------------------|----------------------|
| Andhra Pradesh   | Jan (B) – Jan (M)                   |                                | Sep (E) – Oct (B)    |
| Assam            |                                     |                                |                      |
| Bihar            | Jul(B) – Jul (M)                    | Apr (M) - Apr (E)              | Sep (E) – Oct (M)    |
| Chattisgarh      | Dec (E) - Jan (M)                   |                                | Sep (E) – Oct (B)    |
| Gujarat          | Jan (B) – Jan (M)                   |                                | Sep (E) – Oct (M)    |
| Haryana          |                                     |                                |                      |
| Himachal Pradesh |                                     |                                |                      |
| Jammu & Kashmir  |                                     |                                |                      |
| Karnataka        | Jan(B) - Jan (M)                    |                                | Sep (E) – Oct (B)    |
| Kerala           |                                     |                                |                      |
| Madhya Pradesh   | Jan (B) – Jan (M)                   |                                | Sep (E) – Oct (B)    |
| Maharashtra      | Jan (B) - Jan (M)                   |                                | Sep (E) – Oct (B)    |
| Meghalaya        |                                     |                                | Sep (E) – Oct (B)    |
| Manipur          |                                     |                                | Sep (E) – Oct (B)    |
| Nagaland         |                                     |                                |                      |
| Odisha           | Jan (B) – Jan (M)                   |                                | Sep (E) – Oct (M)    |
| Punjab           |                                     |                                |                      |
| Jharkhand        | Jan (B) – Jan (M)                   | Mar (M) - Apr (B)              | Sep (E) – Oct (M)    |
| Rajasthan        |                                     |                                | Sep (E) – Oct (B)    |
| Tamilnadu        | Jan (B) – Jan (M)                   |                                |                      |
| Tripura          |                                     |                                |                      |
| Uttar Pradesh    | Jul(B) – Jul(M)                     | Apr (B) - Apr (M)              | Sep (E) – Oct (B)    |
| Uttarakhand      |                                     |                                |                      |
| West Bengal      |                                     |                                | Sep (E) – Oct (B)    |
| ALL - INDIA      | Dec (E) - Jan (M)                   | Mar (M) - Apr (E)              | Sep (E) – Oct (B)    |

### Harvesting Season of Principal Crops in Major Growing States

| STATE            | NIGER<br>(KHARIF) | NIGER<br>(LATE<br>KHARIF) | GRAM<br>(RABI)  |
|------------------|-------------------|---------------------------|-----------------|
| Andhra Pradesh   | Oct(L) - Nov(L)   | Nov(B) - Dec(B)           | Feb(M) - Mar(B) |
| Assam            |                   |                           | Mar(B) - Mar(E) |
| Bihar            | Oct(L) - Dec(M)   | Nov(B) - Dec(B)           | Mar(B) - Mar(E) |
| Chattisgarh      | Oct(L) - Nov(L)   |                           | Feb(E) - Mar(E) |
| Gujarat          | Oct(M) - Nov(L)   | Nov(B) - Dec(B)           | Feb(M) - Mar(M) |
| Haryana          |                   |                           | Mar(M) - Apr(B) |
| Himachal Pradesh |                   |                           |                 |
| Jammu & Kashmir  |                   |                           |                 |
| Karnataka        | Oct(M) - Nov(M)   | Nov(B) - Dec(B)           | Jan(M) - Feb(E) |
| Kerala           |                   |                           |                 |
| Madhya Pradesh   | Oct(L) - Nov(L)   | Nov(B) - Dec(B)           | Feb(M) - Mar(E) |
| Maharashtra      | Oct(M) - Dec(E)   | Nov(B) - Dec(B)           | Feb(M) - Mar(E) |
| Meghalaya        |                   |                           | Dec(B) - Jan(E) |
| Manipur          |                   |                           | Mar - Apr       |
| Nagaland         |                   |                           |                 |
| Odisha           | Oct(L) - Nov(L)   | Nov(B) - Dec(B)           |                 |
| Punjab           |                   |                           | Mar(M) - Apr(E) |
| Jharkhand        | Oct(L) - Dec(M)   | Nov(B) - Dec(B)           | Mar(B) - Mar(M) |
| Rajasthan        |                   |                           | Mar(M) - Apr(E) |
| Tamilnadu        |                   |                           |                 |
| Tripura          |                   |                           |                 |
| Uttar Pradesh    |                   |                           | Mar(M) - Apr(E) |
| Uttarakhand      |                   |                           |                 |
| West Bengal      | Sep(E) - Oct(B)   |                           | Mar(B) - Mar(E) |
| ALL - INDIA      | Sep(E) - Nov(M)   | Nov(B) - Dec(B)           | Dec(B) - Apr(E) |

### Harvesting Season of Principal Crops in Major Growing States

| STATE          | GROUNDNUT<br>(KHARIF) | GROUNDNUT<br>(RABI) | GROUNDNUT<br>(SUMMER/ SPRING) |
|----------------|-----------------------|---------------------|-------------------------------|
| Andhra Pradesh | Oct (B) - Nov (E)     | Feb (E) – May (B)   |                               |
| Assam          |                       | Nov (B) – Dec (E)   |                               |
| Bihar          |                       |                     |                               |
| Chattisgarh    | Sep (M) – Nov (B)     |                     |                               |
| Gujarat        | Sep (B) - Nov (E)     |                     | Apr (B) – May (E)             |
| Jharkhand      | Oct (B) – Nov (E)     |                     |                               |
| Karnataka      | Oct (B) - Nov (E)     | Feb (E) –May (B)    | Mar (B) – Jun (E)             |
| Madhya Pradesh | Oct (B) - Nov (M)     |                     |                               |
| Maharashtra    | Oct (B) - Nov (B)     |                     | Apr (B) – May (E)             |
| Manipur        | Oct (B) - Nov (E)     |                     |                               |
| Odisha         | Oct (E) - Nov (B)     | Jan(B)              | Apr (B)- May (E)              |
| Punjab         | Oct (B) - Nov (E)     |                     | Jun (M)- Jun (E)              |
| Puducherry     | Sep (B) - Oct (E)     | Mar (B ) - Apr (E)  |                               |
| Rajasthan      | Oct (B) – Nov (E)     |                     | May (M)- May (E)              |
| Tamilnadu      | Sep (B) - Oct (B)     | Jan (B)             | Apr (B) – May (E)             |
| Tripura        |                       |                     |                               |
| Uttar Pradesh  | Oct (B) - Nov( B)     |                     |                               |
| Uttarakhand    |                       |                     |                               |
| West Bengal    | Sep (E) – Oct (B)     | Jan (E) - Mar (B)   | May (B) – Jun (E)             |
| ALL - INDIA    | Oct - Nov             | Feb - May           | Apr - May                     |

### Harvesting Season of Principal Crops in Major Growing States

| STATE            | LINSEED<br>(RABI) | SESAMUM<br>(KHARIF) | SESAMUM<br>(PRE-RABI) |
|------------------|-------------------|---------------------|-----------------------|
| Andhra Pradesh   | Feb(L) - Mar(L)   | Oct(M) -Nov(M)      | Dec(E) - Jan(M)       |
| Assam            | Mar(E) - Apr(L)   |                     |                       |
| Bihar            | Mar(B) - Apr(E)   |                     |                       |
| Chattisgarh      | Mar(E) - Mar(L)   |                     |                       |
| Gujarat          |                   | Oct - Nov           |                       |
| Haryana          |                   |                     |                       |
| Himachal Pradesh | Apr(E) - May(M)   |                     |                       |
| Jammu & Kashmir  | Apr(E) - May(M)   |                     |                       |
| Karnataka        | Feb(E) - Mar(M)   | Oct(M) - Nov(M)     |                       |
| Kerala           |                   | Oct(M) - Nov(M)     |                       |
| Madhya Pradesh   | Mar(E) - Mar(L)   | Oct(M) - Nov(M)     | Dec(E) - Jan(M)       |
| Maharashtra      | Mar(E) - Mar(L)   | Oct(M) - Nov(M)     | Dec(E) - Jan(M)       |
| Meghalaya        |                   |                     |                       |
| Manipur          |                   |                     |                       |
| Nagaland         | Mar(E) - Apr(L)   |                     |                       |
| Odisha           | Mar(E) - Mar(L)   | Oct(M) - Nov(M)     |                       |
| Punjab           | Mar(E) - Apr(E)   |                     |                       |
| Jharkhand        | Mar(E) - Apr(L)   |                     |                       |
| Rajasthan        | Mar(B) - Mar(E)   | Oct(M) - Nov(M)     |                       |
| Tamilnadu        |                   | Oct - Nov           | Dec(E) - Jan(M)       |
| Telangana        |                   | Oct(L) - Nov(E)     |                       |
| Tripura          |                   |                     |                       |
| Uttar Pradesh    | Mar(E) - Apr(L)   | Oct(M) - Nov(M)     |                       |
| Uttarakhand      |                   |                     |                       |
| West Bengal      | Mar(E) - Apr(M)   |                     |                       |
| ALL - INDIA      | Feb(E) - May(M)   | Sep - Nov           | Dec(E) - Jan(M)       |

**APPENDIX-II (CONTD.)**

**Harvesting Season of Principal Crops in Major Growing States**

| <b>STATE</b>     | <b>SESAMUM<br/>(RABI)</b> | <b>SESAMUM<br/>(SUMMER)</b> | <b>RAPESEED &amp;<br/>MUSTARD SEED</b> |
|------------------|---------------------------|-----------------------------|----------------------------------------|
| Andhra Pradesh   |                           | Apr(M) - May(E)             | Feb - Mar                              |
| Assam            |                           |                             | Feb - Mar                              |
| Bihar            |                           |                             | Feb - Mar                              |
| Chattisgarh      |                           |                             | Mar                                    |
| NCT Delhi        |                           |                             | Feb - Mar                              |
| Gujarat          |                           | May – Jun                   | Feb - Mar                              |
| Haryana          |                           |                             | Feb - Mar                              |
| Himachal Pradesh |                           |                             | Mar - Apr                              |
| Jammu & Kashmir  |                           |                             | Mar - Apr                              |
| Karnataka        |                           |                             | Feb                                    |
| Kerala           |                           | Apr(M) - May(E)             |                                        |
| Madhya Pradesh   |                           |                             | Feb - Mar                              |
| Maharashtra      |                           | Apr(M) - May(E)             | Feb - Mar                              |
| Meghalaya        |                           |                             |                                        |
| Manipur          |                           |                             | Mar                                    |
| Nagaland         |                           |                             |                                        |
| Odisha           | Feb(M) - Mar(E)           | May(M) - Jun(M)             | Feb - Mar                              |
| Punjab           |                           |                             | Mar - Apr                              |
| Jharkhand        |                           |                             | Mar                                    |
| Rajasthan        |                           |                             | Feb - Mar                              |
| Tamilnadu        | Feb(M) - Mar(E)           | May(M) - Jun(M)             |                                        |
| Telangana        | Feb(L) - Mar(M)           | Apr(E) - May(E)             |                                        |
| Tripura          |                           |                             |                                        |
| Uttar Pradesh    |                           | May(M) - Jun(M)             | Feb - Mar                              |
| Uttarakhand      |                           |                             | Mar                                    |
| West Bengal      |                           | May(M) - Jun(M)             | Feb - Mar                              |
| ALL - INDIA      | Feb(M) - Mar(E)           | May – Jun                   | Feb - Apr                              |

### Harvesting Season of Principal Crops in Major Growing States

| STATE            | SUNFLOWER<br>(KHARIF) | SUNFLOWER<br>(RABI) | SUNFLOWER<br>(SUMMER/ SPRING) |
|------------------|-----------------------|---------------------|-------------------------------|
| Andhra Pradesh   | Sep - Nov             | Jan                 |                               |
| Assam            |                       |                     |                               |
| Bihar            |                       | Apr - May           |                               |
| Chattisgarh      |                       |                     |                               |
| Gujarat          |                       |                     |                               |
| Haryana          |                       |                     | May                           |
| Himachal Pradesh |                       |                     |                               |
| Jammu & Kashmir  |                       |                     |                               |
| Karnataka        | Sep - Nov             | Jan                 | Mar - Apr                     |
| Kerala           |                       |                     |                               |
| Madhya Pradesh   |                       |                     |                               |
| Maharashtra      | Oct - Nov             | Jan                 |                               |
| Meghalaya        |                       |                     |                               |
| Manipur          |                       |                     |                               |
| Nagaland         |                       |                     |                               |
| Odisha           |                       |                     |                               |
| Punjab           |                       |                     | Apr - May                     |
| Jharkhand        |                       |                     |                               |
| Rajasthan        |                       |                     |                               |
| Tamilnadu        | Sep - Nov             | Jan                 |                               |
| Telangana        | Sep - Nov             |                     |                               |
| Tripura          |                       |                     |                               |
| Uttar Pradesh    |                       |                     |                               |
| Uttarakhand      |                       |                     |                               |
| West Bengal      |                       |                     | Apr - May                     |
| ALL - INDIA      | Sep - Nov             | Jan                 | Apr - May                     |

### Harvesting Season of Principal Crops in Major Growing States

| STATE            | CASTORSEED<br>(KHARIF) | MAIZE<br>(KHARIF) | MAIZE<br>(RABI)   |
|------------------|------------------------|-------------------|-------------------|
| Andhra Pradesh   | Dec - Jan              | Sep (M) – Oct (E) | Feb (E) – May (B) |
| Assam            |                        |                   |                   |
| Bihar            |                        | Oct (M) – Nov (M) | Feb (B) – Mar (B) |
| Chattisgarh      | Feb                    |                   |                   |
| Gujarat          | Jan - Feb              | Sep (B) – Nov (B) |                   |
| Haryana          | Jan - Feb              | Oct (M) – Oct (E) |                   |
| Himachal Pradesh |                        | Sep (M) – Oct (M) |                   |
| Jammu & Kashmir  |                        | Oct (B) – Nov (B) |                   |
| Karnataka        | Nov - Dec              | Sep (B) – Oct (E) | Feb (B) – Mar (E) |
| Kerala           |                        |                   |                   |
| Madhya Pradesh   |                        | Aug (M) – Nov (E) |                   |
| Maharashtra      | Dec - Jan              | Oct (B) – Nov (E) |                   |
| Meghalaya        |                        |                   |                   |
| Manipur          |                        |                   |                   |
| Nagaland         |                        |                   |                   |
| Odisha           | Dec - Jan              | Sep - Oct         |                   |
| Punjab           |                        | Sep (B) – Oct (E) | May (B) – May (E) |
| Jharkhand        |                        |                   |                   |
| Rajasthan        | Jan - Feb              | Oct (B) - Nov (E) |                   |
| Tamilnadu        | Dec - Jan              | Oct (M) - Oct (E) | Jan (B) – Jan (E) |
| Telangana        | Dec – Jan              |                   |                   |
| Tripura          |                        |                   |                   |
| Uttar Pradesh    |                        | Sep (M) - Oct (M) | May (B) - May (E) |
| Uttarakhand      |                        |                   |                   |
| West Bengal      |                        | Sep (M) - Oct (M) | Mar (B) - Mar (E) |
| ALL - INDIA      | Jan - Feb              | Sep - Nov         | Jan – May         |

**Harvesting Season of Principal Crops in Major Growing States**

| <b>STATE</b>     | <b>COTTON<br/>(KHARIF)</b> | <b>JUTE<br/>(KHARIF)</b> | <b>POTATO</b>         |
|------------------|----------------------------|--------------------------|-----------------------|
| Andhra Pradesh   | Dec(E) - Mar(M)            |                          | Apr - Jun             |
| Assam            |                            |                          | Dec - Jan             |
| Bihar            | Oct(M) - Nov(M)            |                          | Jan - Feb             |
| Chattisgarh      |                            |                          | Jan - Mar             |
| Gujarat          | Oct(B) - Apr(E)            |                          | Jan                   |
| Haryana          | Oct(M) - Nov(M)            |                          | Feb - Mar             |
| Himachal Pradesh |                            |                          | May - Jun & Aug -Nov  |
| Jammu & Kashmir  |                            |                          | Apr & Jul             |
| Karnataka        |                            |                          | Feb - Mar & Sep - Oct |
| Kerala           | Dec(B) - Mar(E)            | Oct(B) - Jan(E)          |                       |
| Madhya Pradesh   | Nov - Jan                  |                          | Feb - Mar             |
| Maharashtra      | Nov - Jan                  |                          | Mar - May             |
| Meghalaya        |                            |                          | Apr                   |
| Manipur          |                            | Aug - Sep                | Dec - Jan             |
| Mizoram          |                            |                          | Sep                   |
| Nagaland         |                            |                          | Feb                   |
| Odisha           | Nov - Jan                  | Aug - Sep                | Feb - Mar             |
| Punjab           | Oct(B) - Dec(E)            |                          | Dec - Jan             |
| Puducherry       |                            |                          | Apr & Jul             |
| Jharkhand        |                            |                          | Dec - Feb             |
| Rajasthan        | Nov(B) - Dec(E)            |                          | Jan - Feb             |
| Sikkim           |                            |                          | Jun - Aug             |
| Tamilnadu        | Feb(B) - Apr(E)            |                          | Round the year        |
| Tripura          |                            | Aug - Sep                |                       |
| Uttar Pradesh    | Sep(B) - Nov(E)            |                          | Mar - Apr             |
| Uttarakhand      |                            |                          | Jul - Aug & Oct - Dec |
| West Bengal      | Jun(B) - Aug(E)            | Jul(B) - Aug(E)          | Mar                   |
| D & N. Haveli    |                            |                          | Jan                   |
| Daman & Diu      |                            |                          | Jan                   |
| ALL - INDIA      | Sep - Dec                  | Aug - Oct                | Round the year        |



**Harvesting Season of Principal Crops in Major Growing States**

| STATE            | SUGARCANE<br>(KHARIF) | SUGARCANE<br>(RABI) |
|------------------|-----------------------|---------------------|
| Andhra Pradesh   |                       | Dec(E) – May(M)     |
| Assam            |                       | Dec(B) - Jan(E)     |
| Bihar            | Oct(B) - Dec(E)       | Nov(B) - Feb(E)     |
| Chattisgarh      |                       |                     |
| Gujarat          |                       |                     |
| Haryana          |                       | Dec(M) - Mar(E)     |
| Himachal Pradesh |                       |                     |
| Jammu & Kashmir  |                       |                     |
| Karnataka        |                       | Aug(B) - May(E)     |
| Kerala           |                       | Dec(B) - Jan(E)     |
| Madhya Pradesh   | Oct(E) - Mar(E)       |                     |
| Maharashtra      | Oct(B) - Nov(E)       |                     |
| Meghalaya        |                       |                     |
| Manipur          |                       |                     |
| Nagaland         |                       |                     |
| Odisha           |                       | Nov – Feb           |
| Punjab           |                       | Nov(B) - Feb(E)     |
| Jharkhand        |                       |                     |
| Rajasthan        |                       | Dec(B) - Mar(E)     |
| Tamilnadu        | May(B) - Aug(E)       | Dec(B) - Jan(E)     |
| Tripura          |                       | Dec – Mar           |
| West Bengal      | Oct(B) – Mar(E)       |                     |
| ALL - INDIA      | Aug(B) - Nov(E)       | Oct(B) - Jan(E)     |

Source:-Agricultural Statistics at a Glance 2016

B: Beginning, E: Early, M: Middle, L: Late

**APPENDIX - III**

**MINIMUM SUPPORT PRICES**

(According to Crop Year)

**Rs. Per Qtl.**

| S.NO. | Commodity                         | Variety       | 2015-16 |
|-------|-----------------------------------|---------------|---------|
|       | <b>KHARIF CROPS</b>               |               |         |
| 1     | PADDY                             | Common        | 1410    |
|       |                                   | Grade 'A'     | 1450    |
| 2     | JOWAR                             | Hybrid        | 1570    |
|       |                                   | Maldandi      | 1590    |
| 3     | BAJRA                             |               | 1275    |
| 4     | MAIZE                             |               | 1325    |
| 5     | RAGI                              |               | 1650    |
| 6     | ARHAR (TUR)                       |               | 4625    |
| 7     | MOONG                             |               | 4850    |
| 8     | URAD                              |               | 4625    |
| 9     | COTTON                            | Medium Staple | 3800    |
|       |                                   | Long Staple   | 4100    |
| 10    | GROUNDNUT IN SHELL                |               | 4030    |
| 11    | SUNFLOWER SEED                    |               | 3800    |
| 12    | SOYABEAN                          | Black         | 0       |
|       |                                   | Yellow        | 2600    |
| 13    | SESAMUM                           |               | 4700    |
| 14    | NIGERSEED                         |               | 3650    |
|       | <b>RABI CROPS</b>                 |               |         |
| 15    | WHEAT                             |               | 1525    |
| 16    | BARLEY                            |               | 1225    |
| 17    | GRAM                              |               | 3500**  |
| 18    | MASUR (LENTIL)                    |               | 3400**  |
| 19    | RAPESEED/MUSTARD                  |               | 3350    |
| 20    | SAFFLOWER                         |               | 3300    |
| 21    | TORIA                             |               | 3290    |
|       | <b>OTHER CROPS</b>                |               |         |
| 22    | COPRA                             | Milling       | 5550    |
|       | (Calendar Year)                   | Ball          | 5830    |
| 23    | DE-HUSKED COCONUT (Calendar Year) |               | 1500    |
| 24    | JUTE                              |               | 2700    |
| 25    | SUGARCANE \$                      |               | 230     |

**\$ Fair and Remunerative Price**

\*\* Including Bonus of Rs.75 per quintal.
