# Supplementary material for: Averting wheat blast by implementing a ‘wheat holiday’: In search of alternative crops in West Bengal, India
Source: PubMed Central journal article supplement (PMC6382110; doi:10.1371/journal.pone.0211410), 2019-02-20
Supplement: pone.0211410.s004.pdf [file pone.0211410.s004.pdf]

**Pocket Book of**  
**AGRICULTURAL STATISTICS**  
**2017**

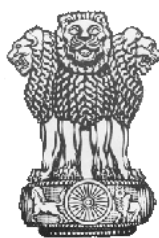

**Government of India**  
**Ministry of Agriculture & Farmers Welfare**  
**Department of Agriculture, Cooperation & Farmers Welfare**  
**Directorate of Economics & Statistics**  
**New Delhi**

# भारत मौसम विज्ञान विभाग INDIA METEOROLOGICAL DEPARTMENT

## जल मौसम विज्ञान प्रभाग HYDROMET DIVISION, NEW DELHI RAINFALL (mm.) FOR THE MONTH Monsoon-2017 (Updated)

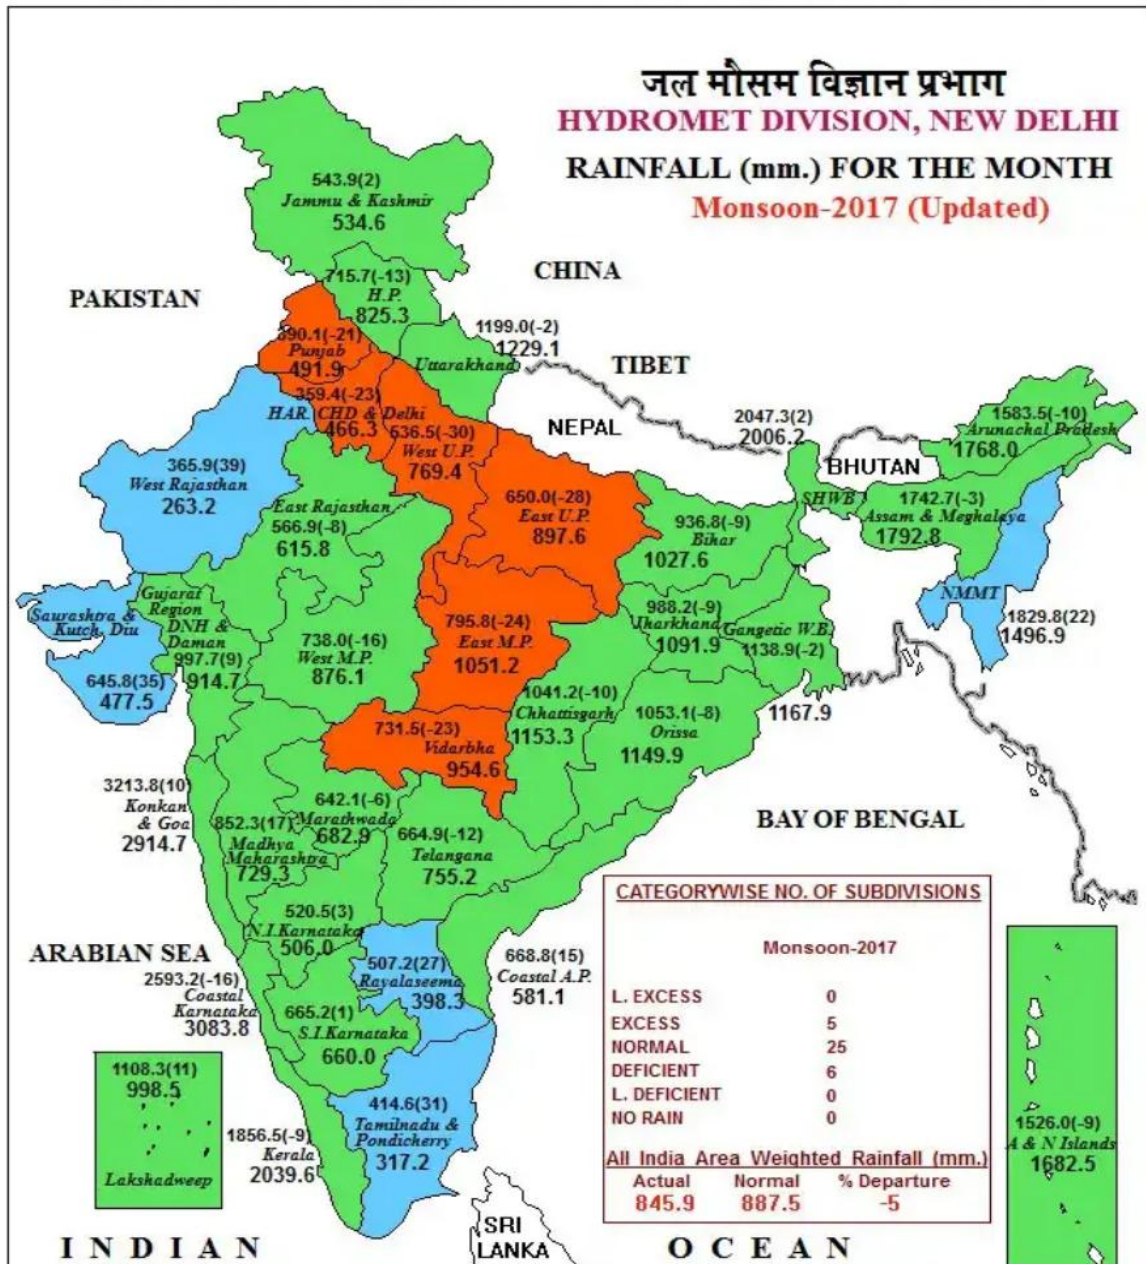

LEGEND: ■ L. EXCESS (+60% OR MORE) ■ EXCESS (+20% TO +59%) ■ NORMAL (+19% TO -19%)  
■ DEFICIENT (-20% TO -59%) ■ L. DEFICIENT (-60% TO -99%) ■ NO RAIN (-100%)  NO DATA

**NOTES:**

- [a] Rainfall figures are based on operational data.
- [b] Small figures indicate actual rainfall (mm.), while bold figures indicate Normal rainfall (mm.)  
Percentage Departures of Rainfall are shown in Brackets.

Source: India Meteorological Department

**K. L. PRASAD**

Senior Economic & Statistical Adviser

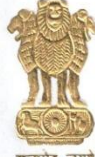

सत्यमेव जयते

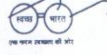

अर्थ एवं सांख्यिकी निदेशालय  
कृषि, सहकारिता एवं किसान कल्याण विभाग  
कृषि एवं किसान कल्याण मंत्रालय

भारत सरकार

कृषि भवन, नई दिल्ली- 110001

Directorate of Economics & Statistics  
Department of Agriculture, Cooperation & Farmers Welfare

Ministry of Agriculture & Farmers Welfare  
Government of India

Krishi Bhawan, New Delhi-110001

Tele. : 011-23384036 Telefax : 23382016

E-mail : office.esa-agri@nic.in

kl.prasad@nic.in

## **PREFACE**

The 'Pocket Book of Agricultural Statistics' begun in 2013 as a quick reference guide for all the essential data relating to agricultural sector. The Pocket Book has become a regular publication of the Directorate.

This year's Pocket Book takes forward our continuous endeavor towards improving ready access to key data on agriculture and allied sector. The Pocket Book includes updated information on key indicators of agriculture and allied sector. In addition, this has been enriched with the status on various new initiatives of the Government, viz., Soil Health Card Scheme, Pradhan Mantri Fasal Bima Yojana (PMFBY), micro irrigation, etc. A copy of this publication has also been uploaded on our website <http://eands.dacnet.nic.in/> for information of public at large.

I am grateful to Shri P.C. Bodh, Adviser and his team for their efforts in bringing out this publication.

Suggestions for improvement are most welcome.

(K.L. Prasad)

Sr. Economic & Statistical Adviser

Date: 28-06-2018

New Delhi.

| <b>CONTENTS</b>           |                                                                                                                                 |                 |
|---------------------------|---------------------------------------------------------------------------------------------------------------------------------|-----------------|
| <b>S.No.</b>              | <b>Particulars</b>                                                                                                              | <b>Page No.</b> |
| <b>ACRONYMS</b>           |                                                                                                                                 | <b>viii</b>     |
| <b>STATISTICAL TABLES</b> |                                                                                                                                 |                 |
| <b>1</b>                  | <b>Socio-Economic Indicators</b>                                                                                                | <b>1</b>        |
| 1.1                       | Selected Economic and Social Indicators                                                                                         | 2               |
| 1.2                       | Gross Value Added(GVA) at basic prices by Economic Activity (at 2011-12 prices)                                                 | 3               |
| 1.3                       | Gross Value Added (GVA) at basic prices by Economic Activity (at current prices)                                                | 3               |
| 1.4                       | Percentage share of Gross Value Added(GVA) at 2011-12 Prices                                                                    | 4               |
| 1.5                       | Percentage Growth of Gross Value Added(GVA) at 2011-12 Prices                                                                   | 5               |
| <b>2</b>                  | <b>Outlays, Expenditure &amp; Capital Formation</b>                                                                             | <b>6</b>        |
| 2.1                       | Year-wise Expenditure by Departments under Ministry of Agriculture & Farmers Welfare                                            | 7               |
| 2.2                       | Public Sector Outlays/ Expenditure                                                                                              | 8               |
| 2.3                       | Outlays / Expenditure under Agriculture and Allied Activities                                                                   | 8               |
| 2.4                       | Plan-wise share of Public Sector Outlays and Expenditure under Agriculture and Allied Activities                                | 9               |
| 2.5                       | Comparison of States Outlay and Expenditure for Eleventh and Twelfth Plan                                                       | 10              |
| 2.6                       | Expenditure on Agricultural Research and Education                                                                              | 11              |
| 2.7                       | Share (%) of Gross Capital Formation (GCF) to Gross Value Added (GVA) in Agriculture & Allied Sectors (Based on 2011-12 Series) | 12              |
| 2.8                       | Public and Private Investment in Agriculture and Allied Sectors in Total GDP at Market Prices (2011-12 series)                  | 12              |
| <b>3</b>                  | <b>Labour Force, Poverty and Unemployment</b>                                                                                   | <b>13</b>       |
| 3.1                       | Population and Agricultural Workers                                                                                             | 14              |
| 3.2                       | Population & Labour Force Projections                                                                                           | 15              |
| 3.3                       | Population Below Poverty Line (Tendulkar Methodology)                                                                           | 16              |
| 3.4                       | All India Rural & Urban Unemployment Rates (2011-12)                                                                            | 17              |
| <b>4</b>                  | <b>Agricultural Land-Use Statistics</b>                                                                                         | <b>18</b>       |
| 4.1                       | Agricultural Land by use in India                                                                                               | 19              |
| 4.2                       | Percentage Distribution of Gross Cropped Area                                                                                   | 20              |
| 4.3                       | Changes in Share of Area under Major Crops                                                                                      | 21              |
| 4.4                       | Number and Area of Operational Holdings by Size Group                                                                           | 22              |
| 4.5                       | South West Monsoon Rainfall (1 Jun- 30 Sep.)                                                                                    | 23              |
| <b>5</b>                  | <b>Area, Production and Yield of Principal Crops</b>                                                                            | <b>24</b>       |
| 5.1                       | Foodgrains: Area, Production and Yield during 2015-16 and 2016-17 in major Producing States alongwith coverage under Irrigation | 25              |
| 5.2<br>(a)                | Area under Major Crops from 1950-51 onwards (in million hectares)                                                               | 26              |
| 5.2<br>(b)                | Production of Major Agricultural Crops                                                                                          | 27              |



|          |                                                                                                                    |           |
|----------|--------------------------------------------------------------------------------------------------------------------|-----------|
| 5.3      | Target and Achievement of Production of Major Crops                                                                | 28        |
| 5.4      | Three Largest Producing States of Important Crops during 2016-17                                                   | 29        |
| 5.5      | Production of Oilseeds/Oils and Net Domestic Availability of Edible Oils                                           | 31        |
| 5.6      | All India Crop-wise Yield                                                                                          | 32        |
| 5.7      | All India Crop-wise Irrigated Area                                                                                 | 33        |
| 5.8      | State-wise Coverage of Irrigated Area under Major Crops during 2014-15                                             | 34        |
|          |                                                                                                                    |           |
| <b>6</b> | <b>Horticulture Statistics</b>                                                                                     | <b>35</b> |
| 6.1      | Area and Production of Horticulture Crops – All India                                                              | 36        |
| 6.2      | All-India Area, Production and Yield of Potato and Onion                                                           | 38        |
| 6.3      | All-India Area, Production and Yield of Banana                                                                     | 38        |
| 6.4      | Foodgrain and Horticulture Production in India                                                                     | 39        |
| 6.5      | Value of Output from Horticulture Crops vis-à-vis All Agriculture Crops (at 2011-12 prices)                        | 40        |
|          |                                                                                                                    |           |
| <b>7</b> | <b>Livestock Statistics</b>                                                                                        | <b>41</b> |
| 7.1      | Livestock Population in India                                                                                      | 42        |
| 7.2      | All India Production of Milk, Eggs and Wool                                                                        | 43        |
| 7.3      | Fish Production in India                                                                                           | 43        |
|          |                                                                                                                    |           |
| <b>8</b> | <b>Agricultural Inputs, Costs &amp; Prices</b>                                                                     | <b>44</b> |
| 8.1      | Production and Use of Agricultural Inputs in India                                                                 | 45        |
| 8.2      | Crop-wise Requirement and Availability of Certified/ Quality Seeds                                                 | 46        |
| 8.3      | Crop-wise Requirement and Availability of Certified/ Quality of Hybrid Seeds                                       | 47        |
| 8.4      | Consumption, Production and Import of Fertilisers in terms of Nutrients (N, P & K)                                 | 48        |
| 8.5      | Zone-wise Consumption of Fertilisers in terms of Nutrients (N, P & K)                                              | 49        |
| 8.6 (a)  | State-wise Status of Soil Health Card Scheme Cycle-I as on 20.02.2018                                              | 50        |
| 8.6 (b)  | State-wise Status of Soil Health Card Scheme Cycle-II as on 20.02.2018                                             | 51        |
| 8.7      | Consumption of Electricity for Agricultural Purposes                                                               | 52        |
| 8.8      | Year-wise Sales of Tractors and Power tillers                                                                      | 53        |
| 8.9      | Flow of Institutional Credit to Agriculture Sector                                                                 | 54        |
| 8.10     | State-wise Agricultural Loan disbursed in 2016-17                                                                  | 55        |
| 8.11     | State-wise and Agency-wise KCCs - Cumulative cards issued and amount Outstanding as on 31 March 2017               | 56        |
| 8.12     | State-wise coverage under Pradhan Mantri Fasal Bima Yojana (PMFBY) - Cumulative upto Rabi 2016-17                  | 57        |
| 8.13     | State-wise coverage under Restructured Weather Based Crop Insurance Scheme (RWBCIS) – Cumulative upto Rabi 2016-17 | 58        |
| 8.14     | Crop-wise area insured under all Insurance Schemes                                                                 | 59        |
| 8.15     | State wise Crop Area Insured under all Insurance Schemes                                                           | 60        |
| 8.16     | State-wise Area Covered under Micro Irrigation as on 31.03.2017                                                    | 61        |
| 8.17     | State wise Cold Storage capacity as on 31.03.2017                                                                  | 62        |
| 8.18     | Cost Estimate of Principal Crops 2014-15                                                                           | 63        |

|           |                                                                                                                                                         |           |
|-----------|---------------------------------------------------------------------------------------------------------------------------------------------------------|-----------|
| 8.19      | All India projected Cost of Production (A2+FL) of Major Crops in India                                                                                  | 67        |
| 8.20      | All India Annual Average Daily Wage Rate                                                                                                                | 68        |
|           |                                                                                                                                                         |           |
| <b>9</b>  | <b>Prices &amp; Procurement</b>                                                                                                                         | <b>69</b> |
| 9.1       | Minimum Support Prices of various Agricultural Commodities                                                                                              | 70        |
| 9.2       | State-wise Procurement of Rice and Wheat in Major Rice and Wheat Producing States                                                                       | 71        |
| 9.3       | Trends in Wholesale Price Index of Commercial Crops (Base: 2004-05=100)                                                                                 | 72        |
|           |                                                                                                                                                         |           |
| <b>10</b> | <b>Per-Capita Availability &amp; Expenditure</b>                                                                                                        | <b>74</b> |
| 10.1      | Per Capita Net Availability of Foodgrains (Per Annum) in India                                                                                          | 75        |
| 10.2      | Per Capita Availability of Certain Important Articles of Consumption                                                                                    | 75        |
| 10.3      | Trends in Consumer Expenditure since 2004-05 (percentage composition)                                                                                   | 76        |
| 10.4      | Index of Terms of Trade between Agriculture and Non-Agricultural sectors                                                                                | 77        |
| 10.5      | Index of Terms of Trade between Farmers and Non-Farmers                                                                                                 | 78        |
|           |                                                                                                                                                         |           |
| <b>11</b> | <b>Key Indicators of Situation of Agricultural Households in India</b>                                                                                  | <b>79</b> |
| 11.1      | Estimated Number of Rural Households, Agricultural Households and Indebted Agricultural Households                                                      | 80        |
| 11.2      | Indebtedness of Agricultural Households (all-India) in Different Size Classes of Land Possessed                                                         | 81        |
| 11.3      | Incidence of Indebtedness in Major States                                                                                                               | 82        |
| 11.4      | Incidence of Indebtedness based on size of land possessed                                                                                               | 83        |
| 11.5      | Average monthly expenses and receipts for crop Production per agricultural household for major States during Jul' 2012 - Jun'2013                       | 85        |
| 11.6      | Average monthly expenses and receipts for farming of animals per agricultural household for major States during Jul' 2012 - Jun'2013                    | 86        |
|           |                                                                                                                                                         |           |
| <b>12</b> | <b>Agricultural Projections</b>                                                                                                                         | <b>87</b> |
| 12.1      | Projected Demand and Supply of Food Commodities for the 12 <sup>th</sup> Plan period                                                                    | 88        |
| 12.2      | Average Annual Growth Rate of Production of selected Food Commodities in India: Actual Production Trends in 2005–15 and Projections by various agencies | 88        |
| 12.3      | Production, Consumption & Year-end Stocks Projections of Major Crops                                                                                    | 89        |
| 12.4      | Production Projections of Potatoes and Onion                                                                                                            | 89        |
|           |                                                                                                                                                         |           |
| <b>13</b> | <b>Imports &amp; Exports of Agricultural Products</b>                                                                                                   | <b>92</b> |
| 13.1      | India's Imports and Exports of Agricultural Commodities                                                                                                 | 93        |
| 13.2      | India's Imports of Agricultural Commodities                                                                                                             | 94        |
| 13.3      | India's Exports of Agricultural Commodities                                                                                                             | 95        |
| 13.4      | Leading Exporters and Importers of Agricultural Products in 2016                                                                                        | 96        |
|           |                                                                                                                                                         |           |
| <b>14</b> | <b>International Comparisons</b>                                                                                                                        | <b>97</b> |
| 14.1      | India's Position in World Agriculture in 2015                                                                                                           | 98        |
| 14.2      | Area, Production and Yield of Principal Crops in various countries in 2015                                                                              | 99        |
| 14.3      | Major Macro-Economic Indicators of India, G-20 and the World in 2016                                                                                    | 101       |

|                   |                                                                                                   |            |
|-------------------|---------------------------------------------------------------------------------------------------|------------|
| 14.4              | Major Macro Economic, Land-Use and Social Indicators of BRICS Economies in 2015                   | 102        |
| 14.5              | Major Economic and Land-Use Indicators: India and China                                           | 103        |
| 14.6              | Inflation (Consumer Prices) in Major Economies (Annual %)                                         | 104        |
|                   |                                                                                                   |            |
| <b>15</b>         | <b>Global Agricultural Emissions</b>                                                              | <b>106</b> |
|                   |                                                                                                   |            |
| <b>CHARTS</b>     |                                                                                                   |            |
|                   |                                                                                                   |            |
| 1 (a)             | Sector-wise Share in Gross Value Added(GVA) at 2011-12 Prices                                     | 4          |
| 1 (b)             | Sector-wise Growth Rate of GVA (2011-12 Prices)                                                   | 5          |
| 4 (a)             | Agriculture Land by Use in India                                                                  | 19         |
| 4 (b)             | Changes in Gross Cropped and Gross Irrigated Areas                                                | 19         |
| 4 (c)             | Distribution of Gross Cropped Area                                                                | 20         |
| 4 (d)             | Changes in share of Area under Major Crops                                                        | 21         |
| 6 (a)             | Trends in Foodgrain and Horticulture Production                                                   | 39         |
| 8 (a)             | Trends in Consumption, Production and Imports of Fertilizers in India                             | 48         |
| 8 (b)             | Trends in Average Daily Wage Rate of Male & Female Workers in Agricultural Operations             | 68         |
| 9 (a)             | Month-wise Trend in Food Inflation of WPI and CPI                                                 | 73         |
| 9 (b)             | Trends in Inflation (WPI) of Food Products, Food Articles and all Commodities                     | 73         |
| 11 (a)            | Distribution of Agricultural Households over Social Groups                                        | 84         |
| 11 (b)            | Distribution of Agricultural Households by principal source of income                             | 84         |
| 12 (a)            | Projected Production of Rice, Wheat and Coarse Grains in India                                    | 90         |
| 12 (b)            | Projected Production of Vegetables and Fruits in India                                            | 90         |
| 12 (c)            | Projected Market Support Prices in India and World Prices for Rice and Wheat                      | 90         |
| 12 (d)            | Projected Per capita Consumption of Cereals in India                                              | 91         |
| 12 (e)            | Projected Calorie and Protein Consumption in India                                                | 91         |
| 13 (a)            | Trends in Agricultural Imports and Exports and share out of Total National Imports/ Exports       | 93         |
| 14 (a)            | Projected Wheat production in China and India                                                     | 105        |
| 14 (b)            | Projected Nutri Cereals production in U.S, China and India                                        | 105        |
| 14 (c)            | Projected Oilseeds production in China, India and Canada                                          | 105        |
| 15 (a)            | All GHG Emission from Agriculture sector by major Continents in 2014 (CO <sub>2</sub> equivalent) | 107        |
| 15 (b)            | Source-wise Total GHG Emissions from Agriculture Sector in 2014                                   | 107        |
|                   |                                                                                                   |            |
| <b>APPENDICES</b> |                                                                                                   | <b>108</b> |
|                   |                                                                                                   |            |
| A.1               | Explanatory Notes                                                                                 | 109        |
| A.2               | Conversion Factors between Important Primary and Secondary Agricultural Commodities               | 110        |
| A.3               | General Seed Rate of Sowing for Important Field Crops                                             | 112        |
| A.4               | Rainfall Position in India                                                                        | 114        |
| A.5               | Major Economic Groups/ Institutions                                                               | 115        |

# ACRONYMS



|                  |                                                                     |
|------------------|---------------------------------------------------------------------|
| AAY              | Antyodaya Anna Yojana                                               |
| AE               | Advance Estimate                                                    |
| AGDP             | Gross Domestic Product from Agriculture                             |
| APL              | Above Poverty Line                                                  |
| BE               | Budget Estimates                                                    |
| BPL              | Below Poverty Line                                                  |
| CACP             | Commission for Agricultural Costs and Prices                        |
| CBB              | Commercial Bank Branch                                              |
| CCE              | Crop Cutting Experiments                                            |
| CCI              | Cotton Corporation of India                                         |
| CDSBO            | Crude Degummed Soyabean Oil                                         |
| CES              | Crop Estimation Surveys                                             |
| CFA              | Central Financial Agency                                            |
| CIF              | Cost, Insurance & Freight                                           |
| CIP              | Central Issue Price                                                 |
| CPI-IW           | Consumer Price Index for Industrial Workers                         |
| CWWG             | Crop Weather Watch Group                                            |
| DAC&FW           | Department of Agriculture, Cooperation & Farmers Welfare            |
| DAP              | Di Ammonium Phosphate                                               |
| DES              | Directorate of Economics and Statistics                             |
| E                | Estimated                                                           |
| EARAS            | Establishment of an Agency for Reporting of Agricultural Statistics |
| FAO              | Food and Agriculture Organisation of United Nations                 |
| FAQ              | Fair Average Quality                                                |
| F2               | Black Soil                                                          |
| F-414/H-777/J-34 | Cotton variety (of Medium Staple Length)                            |
| H-4/H-6          | Cotton variety (of Long Staple Length)                              |
| FCI              | Food Corporation of India                                           |

|         |                                                                    |
|---------|--------------------------------------------------------------------|
| FDI     | Foreign Direct Investment                                          |
| FFB     | Fresh Fruit Bunch                                                  |
| FOD     | Field Operations Division of NSSO                                  |
| FRL     | Full Reservoir Level                                               |
| FYM     | Farm Yard Manure                                                   |
| GCA     | Gross Cropped Area                                                 |
| GCES    | General Crop Estimation Survey                                     |
| GCF     | Gross Capital Formation                                            |
| GDP     | Gross Domestic Product                                             |
| GNP     | Gross National Product                                             |
| GSDP    | Gross State Domestic Product                                       |
| GVA     | Gross Value Added                                                  |
| Ha      | Hectares                                                           |
| HYV     | High Yielding Varieties                                            |
| I       | Irrigated                                                          |
| IAS     | Improvement of Agricultural Statistics                             |
| ICAR    | Indian Council of Agricultural Research                            |
| ICOR    | Incremental Capital Output Ratio                                   |
| ICS     | Improvement of Crop Statistics                                     |
| K       | Potash                                                             |
| KCC     | Kisan Credit Card                                                  |
| Kgs     | Kilograms                                                          |
| KMPH    | Kilometers Per Hour                                                |
| KWH     | Kilo Watt Hour                                                     |
| LS      | Light Soil                                                         |
| LPCPD   | Litres Per Capita Per Day                                          |
| MSCCGMF | Maharashtra State Co-operative Cotton Growers Marketing Federation |
| MIS     | Market Intervention Scheme                                         |
| MSP     | Minimum Support Price                                              |
| MSR     | Marketed Surplus Ratio                                             |

|       |                                                                          |
|-------|--------------------------------------------------------------------------|
| N     | Nitrogen                                                                 |
| NA    | Not Available/Not Announced                                              |
| NC    | Not Collected                                                            |
| NCAER | National Council of Applied Economic Research                            |
| NQ    | Not Quoted                                                               |
| NAFED | National Agricultural Co-operative Marketing Federation of India Limited |
| NCAER | National Council of Applied Economic Research                            |
| NDDB  | National Dairy Development Board                                         |
| Neg.  | Negligible                                                               |
| NNP   | Net National Product                                                     |
| N,P&K | Nitrogen, Phosphate and Potash                                           |
| NR    | Not Recommended/ Not Reported                                            |
| NS    | New Series Estimates                                                     |
| NSA   | Net Sown Area                                                            |
| NSSO  | National Sample Survey Organisation                                      |
| OECD  | Organisation of Economic Cooperation and Development                     |
| OPDP  | Oil Palm Development Programme                                           |
| P     | Provisional/ Phosphate                                                   |
| PACS  | Primary Agricultural Credit Society                                      |
| PDS   | Public Distribution System                                               |
| PLDB  | Primary Land Development Bank                                            |
| PMKSY | Pradhan Mantri Krishi Sinchayee Yojana                                   |
| PMFBY | Pradhan Mantri Fasal Bima Yojana                                         |
| PSE   | Producers Support Estimate                                               |
| PSEs  | Public Sector Enterprises                                                |
| PSS   | Price Support Scheme                                                     |
| QE    | Quick Estimate                                                           |
| R     | Revised                                                                  |
| R&D   | Research & Development                                                   |
| R&M   | Rapeseed & Mustard                                                       |

|      |                                           |
|------|-------------------------------------------|
| RMC  | Regional Ministers Conference             |
| RE   | Revised Estimates                         |
| RRBB | Regional Rural Bank Branch                |
| SCB  | State Cooperative Bank                    |
| SDP  | State Domestic Product                    |
| SASA | State Agricultural Statistical Authority  |
| SHC  | Soil Health Card                          |
| SLDB | State Land Development Bank               |
| SRS  | Sample Registration Scheme                |
| SSP  | Single Super Phosphate                    |
| T    | Target                                    |
| T E  | Triennium Ending                          |
| TD-5 | Tossa Deshi variety of Jute               |
| TPDS | Targeted Public Distribution System       |
| TRQ  | Tariff Rate Quota                         |
| TRRM | Tropical Rains Measuring Mission          |
| TT   | Tentative Targets                         |
| UI   | Un-irrigated                              |
| UT   | Union Territory                           |
| WPI  | Wholesale Price Index                     |
| WTO  | World Trade Organisation                  |
| Y    | Yield (Index Number of Yield) per hectare |

# SOCIO-ECONOMIC INDICATORS

**Table: 1.1 Selected Economic and Social Indicators**

| Indicators                                                                                                                                          | 1950-51 | 1960-61 | 1990-91 | 2000-01 | 2010-11           | 2011-12           | 2012-13           | 2013-14           | 2014-15             | 2015-16                 | 2016-17 (PE)          |
|-----------------------------------------------------------------------------------------------------------------------------------------------------|---------|---------|---------|---------|-------------------|-------------------|-------------------|-------------------|---------------------|-------------------------|-----------------------|
| (1)                                                                                                                                                 | (2)     | (3)     | (4)     | (5)     | (6)               | (7)               | (8)               | (9)               | (10)                | (11)                    | (12)                  |
| <b>ECONOMIC INDICATORS</b>                                                                                                                          |         |         |         |         |                   |                   |                   |                   |                     |                         |                       |
| GVA <sup>a</sup> (at current prices in ₹ crore)                                                                                                     | 10036   | 17049   | 531814  | 2000743 | 7248860           | 8106946           | 9202692           | 10363153          | 11504279            | 12566646 <sup>#</sup>   | 13841591 <sup>@</sup> |
| GVA <sup>a</sup> (at constant prices in ₹ crore)                                                                                                    | 279618  | 410279  | 1347889 | 2348481 | 4918533           | 8106946           | 8546275           | 9063649           | 9712133             | 10503348 <sup>#</sup>   | 11247629 <sup>@</sup> |
| Per capita Net National Income at factor cost at constant prices (₹)                                                                                | 7513    | 9482    | 15996   | 22491   | 39270             | 63462             | 65538             | 68572             | 72805               | 77826 <sup>#</sup>      | 82229 <sup>@</sup>    |
| Gross Domestic Capital Formation as percentage of GDP (at current market prices)                                                                    | 9.3     | 14.3    | 26.0    | 24.3    | 36.5              | 39.0              | 38.7              | 33.8              | 33.5                | 32.3                    | 30.6                  |
| Gross domestic savings as percentage of GDP (at current market prices)                                                                              | 9.5     | 11.6    | 22.9    | 23.7    | 33.7              | 34.6              | 33.9              | 32.1              | 32.2                | 31.3                    | 30.0                  |
| Index of agricultural production [base: Triennium ending 1981-82] for the data given till 2000-01 and base i.e. ending 2007-08 from 2009-10 onwards | 46.2    | 68.8    | 148.4   | 165.7   | 121.1             | 124.5             | 124.2             | 129.8             | 124                 | 120.8                   | 130.6                 |
| 05=100) <sup>b</sup>                                                                                                                                | 7.9     | 15.6    | 91.6    | 162.6   | 165.5             | 170.3             | 103.3             | 106.7             | 111.0               | 114.7                   | 120.0                 |
| Wholesale Price Index average <sup>c</sup>                                                                                                          | 6.8     | 7.9     | 73.7    | 155.7   | 143.3             | 156.1             | 106.9             | 112.5             | 113.9               | 109.7                   | 111.6                 |
| Consumer Price Index for Industrial workers <sup>d</sup>                                                                                            | 17      | 21.0    | 193.0   | 444.0   | 180.0             | 195.0             | 215.0             | 236.0             | 251.0               | 265.0                   | 276.0                 |
| <b>OUTPUT</b>                                                                                                                                       |         |         |         |         |                   |                   |                   |                   |                     |                         |                       |
| (a) Foodgrains [million tonnes]                                                                                                                     | 50.8    | 82.0    | 176.4   | 196.8   | 244.5             | 259.3             | 257.1             | 265.0             | 252.0               | 251.6                   | 275.1                 |
| (b) Coal and lignite [million tonnes]                                                                                                               | 32.3    | 55.2    | 225.5   | 332.6   | 570.4             | 582.3             | 602.9             | 610.0             | 657.4               | 683                     | 704.4(P)              |
| (c) Crude oil [million tonnes]                                                                                                                      | 0.3     | 0.5     | 33.0    | 32.4    | 37.7              | 38.1              | 37.9              | 37.8              | 37.4                | 36.9                    | 36.0                  |
| (d) Electricity generated [utilities only] [billion KWH]                                                                                            | 5.0     | 17.0    | 264.0   | 500.0   | 844.8             | 922.5             | 964.5             | 1026.6            | 1105.1              | 1167.6                  | 1236.4                |
| Plan outlay (₹ crore)                                                                                                                               | 2601    | 1117    | 58369   | 185737  | 826268            | 936292            | 971951            | 1281022           | 420882 <sup>f</sup> | 582707(RE) <sup>f</sup> | 706248.4(BE)          |
| <b>FOREIGN TRADE</b>                                                                                                                                |         |         |         |         |                   |                   |                   |                   |                     |                         |                       |
| (i) Exports (₹ Crore)                                                                                                                               | 606     | 642     | 32553   | 203571  | 1136964           | 1465959           | 1634319           | 1905011           | 1896348             | 1716378                 | 1849429               |
| (US \$ million)                                                                                                                                     | 1269    | 1346    | 18143   | 44076   | 251136            | 305964            | 300401            | 314405            | 310338              | 262290                  | 275852                |
| (ii) Imports (₹ Crore)                                                                                                                              | 608     | 1122    | 43198   | 230873  | 1683467           | 2345463           | 2669162           | 2715434           | 2737087             | 2490298                 | 2577666               |
| (US \$ million)                                                                                                                                     | 1273    | 2353    | 24075   | 49975   | 369769            | 489319            | 490737            | 450200            | 448033              | 381007                  | 384356                |
| Foreign exchange reserves <sup>g</sup> [excluding gold, SDRs and Reverse Tranche Position at IMF]; (₹ Crore)                                        | 911     | 186     | 4388    | 184482  | 1224883           | 1330511           | 1412631           | 1660914           | 1985458             | 2219061                 | 2244939               |
| (US \$ million)                                                                                                                                     | 1914    | 390     | 2236    | 39554   | 274330            | 260069            | 259726            | 276359            | 295947              | 336104                  | 346319                |
| <b>SOCIAL INDICATORS</b>                                                                                                                            |         |         |         |         |                   |                   |                   |                   |                     |                         |                       |
| Population (Million) <sup>h</sup>                                                                                                                   | 361     | 439.2   | 846.4   | 1028.7  | 1186.0            | 1220.0            | 1235.0            | 1251.0            | 1267.0              | 1283.0                  | 1299.0                |
| Birth Rate (per 1000) <sup>i</sup>                                                                                                                  | 39.9    | 41.7    | 29.5    | 25.4    | 21.8 <sup>k</sup> | 21.6 <sup>k</sup> | 21.4 <sup>k</sup> | 21.0 <sup>k</sup> | 20.8                | 20.4                    | NA                    |
| Death Rate (per 1000) <sup>i</sup>                                                                                                                  | 27.4    | 22.8    | 9.8     | 8.4     | 7.1 <sup>k</sup>  | 7.0 <sup>k</sup>  | 7.0 <sup>k</sup>  | 6.7 <sup>k</sup>  | 6.5                 | 6.4                     | NA                    |
| Life Expectancy at Birth (in Years) <sup>j</sup>                                                                                                    | 32.1    | 41.3    | 58.7    | 62.5    | 67.0              | 67.5              | 67.9              | 68.3              | NA                  | NA                      | NA                    |
| (a) Male                                                                                                                                            | 32.5    | 41.9    | 58.6    | 61.6    | 65.4              | 65.8              | 66.4              | 66.9              | NA                  | NA                      | NA                    |
| (b) Female                                                                                                                                          | 31.7    | 40.6    | 59.0    | 63.3    | 68.8              | 69.3              | 69.6              | 70.0              | NA                  | NA                      | NA                    |
| Education: Literacy Rate (%) <sup>l</sup>                                                                                                           | 18.3    | 28.3    | 52.2    | 64.8    | 73.0              | NA                | NA                | NA                | NA                  | NA                      | NA                    |
| (a) Male                                                                                                                                            | 27.2    | 40.4    | 64.1    | 75.3    | 82.1              | NA                | NA                | NA                | NA                  | NA                      | NA                    |
| (b) Female                                                                                                                                          | 8.9     | 15.4    | 39.3    | 53.7    | 65.5              | NA                | NA                | NA                | NA                  | NA                      | NA                    |

BE: Budget Estimate, RE: Revised Estimate, AE: Advance Estimate, PE: Provisional Estimate NA: Not Available # : 2nd Revised Estimates (New Series)

^The figures before 2012-13 are measured at factor cost. The figures from 2012-13 onwards are measured at basic price @ : 1st Revised Estimates (New

a: GVA at factor cost estimates prior to 2011-12 are based on 2004-05 series. Estimates from Year 2011-12 onwards (with Base 2011-12) are available at Basic Prices only.

b: The Index of Industrial Production has been revised since 2012-13 on base 2011-12. The

figures from 2012-13 onwards are based on current series (2011-12), and earlier data are

c: The figures from 2012-13 onwards are based on current series 2011-12=100 and earlier data are based on old base years.

d: The figures from 2009-10 onwards are based on current series 2001=100 and earlier data are based on old base years.

e: Final Estimates.

f: Outlays are only of the Centre as Outlays of State & UTs are Not Available from 2014-15 onwards.

g: As on end-March.

h: Relates to mid-financial year (as on October 1) based on population figures of C.S.O.

i: For calendar year. Figure shown against 1990-91 is for calendar year 1991 and so on. Source: Office of R.G.I.

j: Data for 1950-51, 1960-61, 1970-71 and 1980-81 relate to the decades 1941-50, 1951-60, 1961-70 and 1971-80 respectively, centered at midpoints

of the decade, i.e., 1946, 1956, 1966 and 1976. The estimates for 1990-91 refer to the period 1988-92 and so on.

Estimates for 2010-11 refers to abridged life table of period 2008-12, 2011-12 refers to 2009-13, 2012-13 refers to 2010-14 and 2013-14 refers to 2011-15.

k: Estimates from Sample Registration System and SRS Statistical Report, Office of RGI.

l: Data for 1950-51, 1960-61, 1970-71, 1980-81, 1990-91 and 2000-01 are as per Census of India 1951, 1961, 1971, 1981, 1991 and 2001. The

figures for 1951 1961 and 1971 relate to population aged 5 years and above and those for 1981, 1991, 2001 and 2011 to population aged 7 years

and above. All India literacy rates exclude Assam for 1981 and J&K for 1991.

Source: Ministry of Finance, Department of Commerce, CSO and RBI.



**Table 1.2: Gross Value Added(GVA) at basic prices by Economic Activity (at 2011-12 prices)**

|       |                                                         | (₹ crore)      |                |                |                |                      |                      |                      |
|-------|---------------------------------------------------------|----------------|----------------|----------------|----------------|----------------------|----------------------|----------------------|
| S.No. | Industry                                                | 2011-12        | 2012-13        | 2013-14        | 2014-15        | 2015-16 <sup>*</sup> | 2016-17 <sup>#</sup> | 2017-18 <sup>@</sup> |
| (1)   | (2)                                                     | (3)            | (4)            | (5)            | (6)            | (7)                  | (8)                  | (9)                  |
| 1.    | <b>Agriculture, forestry and fishing</b>                | <b>1501947</b> | <b>1524288</b> | <b>1609198</b> | <b>1605715</b> | <b>1615216</b>       | <b>1716746</b>       | <b>1774573</b>       |
|       | crops                                                   | 982151         | 983809         | 1037060        | 998425         | 966345               | 1033008              | -                    |
|       | livestock                                               | 327334         | 344375         | 363558         | 390449         | 421369               | 448964               | -                    |
|       | forestry and logging                                    | 124436         | 124743         | 132093         | 134609         | 137022               | 138779               | -                    |
|       | fishing and aquaculture                                 | 68027          | 71362          | 76487          | 82232          | 90480                | 95996                | -                    |
| II    | <b>Industry</b>                                         | <b>2635023</b> | <b>2721167</b> | <b>2824188</b> | <b>3021899</b> | <b>3317881</b>       | <b>3542820</b>       | <b>3739212</b>       |
|       | Mining and quarrying                                    | 261035         | 262609         | 263107         | 288685         | 328453               | 371066               | 381965               |
|       | Manufacturing                                           | 1409986        | 1486873        | 1560709        | 1683938        | 1898790              | 2048711              | 2166267              |
|       | Electricity, gas, water supply & other utility services | 186668         | 191635         | 199601         | 214047         | 224198               | 244934               | 262496               |
|       | Construction                                            | 777335         | 780050         | 800771         | 835229         | 866440               | 878110               | 928484               |
| III   | <b>Services</b>                                         | <b>3969975</b> | <b>4300819</b> | <b>4630263</b> | <b>5084519</b> | <b>5570251</b>       | <b>5988063</b>       | <b>6462370</b>       |
|       | <b>TOTAL GVA at basic prices</b>                        | <b>8106946</b> | <b>8546275</b> | <b>9063649</b> | <b>9712133</b> | <b>10503348</b>      | <b>11247629</b>      | <b>11976155</b>      |

Source: Central Statistics Office

\* : 2nd Revised Estimates (New Series)

# : 1st Revised Estimates (New Series)

@ : Provisional Estimates (New Series)

**Table 1.3: Gross Value Added (GVA) at basic prices by Economic Activity (at current prices)**

|       |                                                         | (₹ crore)      |                |                 |                 |                      |                      |                      |
|-------|---------------------------------------------------------|----------------|----------------|-----------------|-----------------|----------------------|----------------------|----------------------|
| S.No. | Industry                                                | 2011-12        | 2012-13        | 2013-14         | 2014-15         | 2015-16 <sup>*</sup> | 2016-17 <sup>#</sup> | 2017-18 <sup>@</sup> |
| (1)   | (2)                                                     | (3)            | (4)            | (5)             | (6)             | (7)                  | (8)                  | (9)                  |
| 1.    | <b>Agriculture, forestry and fishing</b>                | <b>1501947</b> | <b>1675107</b> | <b>1926372</b>  | <b>2093612</b>  | <b>2225368</b>       | <b>2484005</b>       | <b>2594729</b>       |
|       | crops                                                   | 982151         | 1088814        | 1248776         | 1292874         | 1327997              | 1530137              | -                    |
|       | livestock                                               | 327334         | 368823         | 422733          | 510411          | 584070               | 639912               | -                    |
|       | forestry and logging                                    | 124436         | 137558         | 156674          | 173760          | 182247               | 180465               | -                    |
|       | fishing and aquaculture                                 | 68027          | 79911          | 98190           | 116567          | 131053               | 133492               | -                    |
| II    | <b>Industry</b>                                         | <b>2635024</b> | <b>2923394</b> | <b>3190871</b>  | <b>3448189</b>  | <b>3746625</b>       | <b>4054112</b>       | <b>4411640</b>       |
|       | Mining and quarrying                                    | 261035         | 285842         | 295794          | 308476          | 301230               | 332947               | 374689               |
|       | Manufacturing                                           | 1409986        | 1572837        | 1713452         | 1878369         | 2116119              | 2329220              | 2530311              |
|       | Electricity, gas, water supply & other utility services | 186668         | 215350         | 260155          | 282258          | 336978               | 363482               | 387694               |
|       | Construction                                            | 777335         | 849365         | 921470          | 979086          | 992298               | 1028463              | 1118946              |
| III   | <b>Services</b>                                         | <b>3969975</b> | <b>4604192</b> | <b>5245909</b>  | <b>5962478</b>  | <b>6594653</b>       | <b>7303474</b>       | <b>8176002</b>       |
|       | <b>Total GVA at basic prices</b>                        | <b>8106946</b> | <b>9202692</b> | <b>10363153</b> | <b>11504279</b> | <b>12566646</b>      | <b>13841591</b>      | <b>15182371</b>      |

Source: Central Statistics Office

\* : 2nd Revised Estimates (New Series)

# : 1st Revised Estimates (New Series)

@ : Provisional Estimates (New Series)

**Table 1.4: Percentage share of Gross Value Added(GVA) at Current Prices**

| S.No.    | Industry                                                | 2011-12      | 2012-13      | 2013-14      | 2014-15      | 2015-16*     | 2016-17#     | 2017-18@     |
|----------|---------------------------------------------------------|--------------|--------------|--------------|--------------|--------------|--------------|--------------|
| (1)      | (2)                                                     | (3)          | (4)          | (5)          | (6)          | (7)          | (8)          | (9)          |
| <b>1</b> | <b>Agriculture,Forestry &amp; Fishing</b>               | <b>18.5</b>  | <b>18.2</b>  | <b>18.6</b>  | <b>18.2</b>  | <b>17.7</b>  | <b>17.9</b>  | <b>17.1</b>  |
| 1.1      | crops                                                   | 12.1         | 11.8         | 12.1         | 11.2         | 10.6         | 11.1         |              |
| 1.2      | livestock                                               | 4.0          | 4.0          | 4.1          | 4.4          | 4.6          | 4.6          |              |
| 1.3      | forestry and logging                                    | 1.5          | 1.5          | 1.5          | 1.5          | 1.5          | 1.3          |              |
| 1.4      | fishing and aquaculture                                 | 0.8          | 0.9          | 0.9          | 1.0          | 1.0          | 1.0          |              |
| <b>2</b> | <b>Industry</b>                                         | <b>32.5</b>  | <b>31.8</b>  | <b>30.8</b>  | <b>30.0</b>  | <b>29.8</b>  | <b>29.3</b>  | <b>29.1</b>  |
| 2.1      | mining & quarrying                                      | 3.2          | 3.1          | 2.9          | 2.7          | 2.4          | 2.4          | 2.5          |
| 2.2      | manufacturing                                           | 17.4         | 17.1         | 16.5         | 16.3         | 16.8         | 16.8         | 16.7         |
| 2.3      | electricity, gas, water supply & other utility services | 2.3          | 2.3          | 2.5          | 2.5          | 2.7          | 2.6          | 2.6          |
| 2.4      | construction                                            | 9.6          | 9.2          | 8.9          | 8.5          | 7.9          | 7.4          | 7.4          |
| <b>3</b> | <b>Services</b>                                         | <b>49.0</b>  | <b>50.0</b>  | <b>50.6</b>  | <b>51.8</b>  | <b>52.5</b>  | <b>52.8</b>  | <b>53.9</b>  |
| <b>4</b> | <b>Gross Value Added at basic prices</b>                | <b>100.0</b> | <b>100.0</b> | <b>100.0</b> | <b>100.0</b> | <b>100.0</b> | <b>100.0</b> | <b>100.0</b> |

\* : 2nd Revised Estimates (New Series)

# : 1st Revised Estimates (New Series)

@ : Provisional Estimates (New Series)

Source: Central Statistics Office

**Chart 1 (a): Sector-wise Share in Gross Value Added(GVA) at Current Prices**

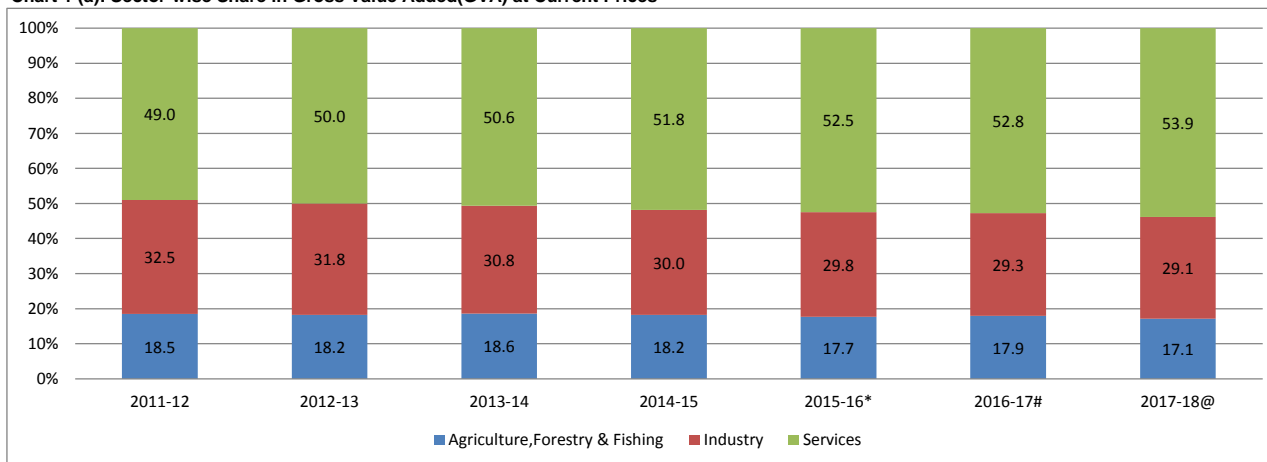

\* : 2nd Revised Estimates (New Series)

# : 1st Revised Estimates (New Series)

@ : Provisional Estimates (New Series)

Source: Central Statistics Office.

**Table 1.5: Percentage Growth of Gross Value Added(GVA) at 2011-12 Prices**

| S.No.    | Industry                                                | 2012-13    | 2013-14    | 2014-15     | 2015-16*   | 2016-17#   | 2017-18@   |
|----------|---------------------------------------------------------|------------|------------|-------------|------------|------------|------------|
| (1)      | (2)                                                     | (3)        | (4)        | (5)         | (6)        | (7)        | (8)        |
| <b>1</b> | <b>Agriculture,forestry &amp; fishing</b>               | <b>1.5</b> | <b>5.6</b> | <b>-0.2</b> | <b>0.6</b> | <b>6.3</b> | <b>3.4</b> |
| 1.1      | crops                                                   | 0.2        | 5.4        | -3.7        | -3.2       | 6.9        |            |
| 1.2      | livestock                                               | 5.2        | 5.6        | 7.4         | 7.9        | 6.5        |            |
| 1.3      | forestry and logging                                    | 0.2        | 5.9        | 1.9         | 1.8        | 1.3        |            |
| 1.4      | fishing and aquaculture                                 | 4.9        | 7.2        | 7.5         | 10.0       | 6.1        |            |
| <b>2</b> | <b>Industry</b>                                         | <b>3.3</b> | <b>3.8</b> | <b>7.0</b>  | <b>9.8</b> | <b>6.8</b> | <b>5.5</b> |
| 2.1      | mining & quarrying                                      | 0.6        | 0.2        | 9.7         | 13.8       | 13.0       | 2.9        |
| 2.2      | manufacturing                                           | 5.5        | 5.0        | 7.9         | 12.8       | 7.9        | 5.7        |
| 2.3      | electricity, gas, water supply & other utility services | 2.7        | 4.2        | 7.2         | 4.7        | 9.2        | 7.2        |
| 2.4      | construction                                            | 0.3        | 2.7        | 4.3         | 3.7        | 1.3        | 5.7        |
| <b>3</b> | <b>Services</b>                                         | <b>8.3</b> | <b>7.7</b> | <b>9.8</b>  | <b>9.6</b> | <b>7.5</b> | <b>7.9</b> |
| <b>4</b> | <b>Gross Value Added at basic prices</b>                | <b>5.4</b> | <b>6.1</b> | <b>7.2</b>  | <b>8.1</b> | <b>7.1</b> | <b>6.5</b> |

\* : 2nd Revised Estimates (New Series)

# : 1st Revised Estimates (New Series)

@ : Provisional Estimates (New Series)

Source: Central Statistics Office

**Chart 1 (b): Sector-wise Growth Rate of GVA at 2011-12 Prices**

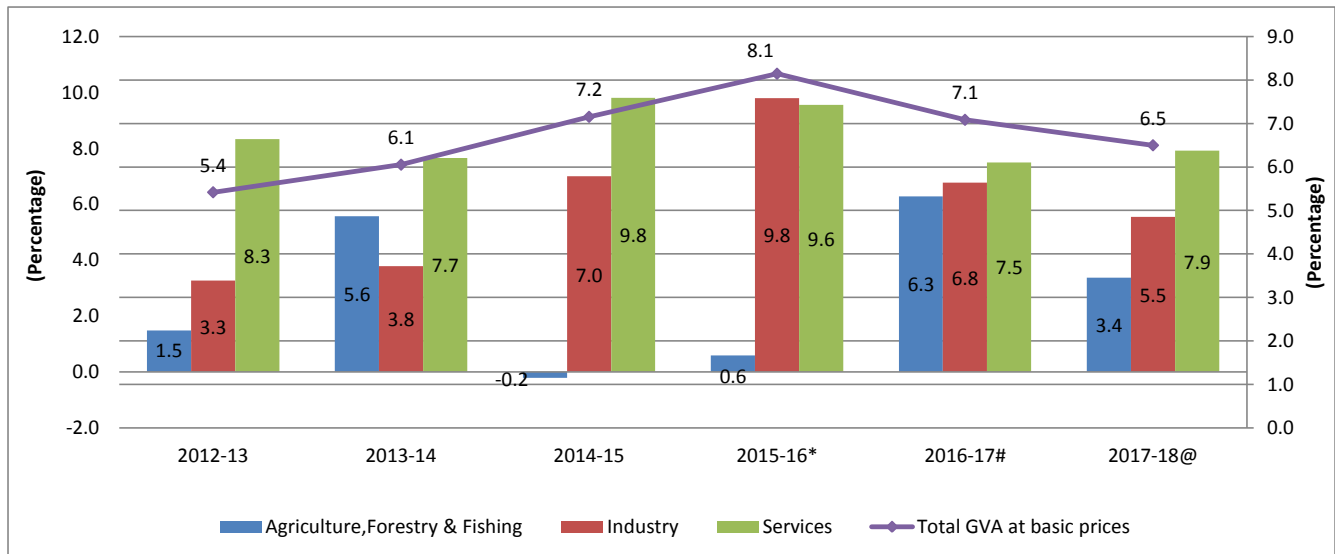

\* : 2nd Revised Estimates (New Series)

# : 1st Revised Estimates (New Series)

@ : Provisional Estimates (New Series)

Source: Central Statistics Office.

# OUTLAYS, EXPENDITURE & CAPITAL FORMATION

**Table 2.1: Year-wise Expenditure by Departments under Ministry of Agriculture & Farmers Welfare**

(₹ crore)

| Year    | DAC&FW          |                  |                    | DARE            |                  |                    | DAHD&F          |                  |                    |
|---------|-----------------|------------------|--------------------|-----------------|------------------|--------------------|-----------------|------------------|--------------------|
|         | Budget Estimate | Revised Estimate | Actual Expenditure | Budget Estimate | Revised Estimate | Actual Expenditure | Budget Estimate | Revised Estimate | Actual Expenditure |
| (1)     | (2)             | (3)              | (4)                | (5)             | (6)              | (7)                | (8)             | (9)              | (10)               |
| 1991-92 | 1041.35         | 1016.93          | 957.86             | 190.00          | 180.51           | 173.07             | -               | -                | -                  |
| 2001-02 | 1985.00         | 1985.00          | 1792.92            | 684.00          | 550.00           | 683.69             | 300.00          | 240.00           | 239.68             |
| 2004-05 | 2650.00         | -                | 2657.42            | 1000.00         | 900.00           | 881.81             | 500.00          | -                | 566.22             |
| 2009-10 | 11307.07        | 10965.23         | 10870.15           | 1833.37         | 1821.32          | 1821.26            | 1100.00         | 930.00           | 873.38             |
| 2010-11 | 15042.00        | 17254.00         | 17052.59           | 2307.50         | 2307.50          | 2529.29            | 1300.00         | 1257.00          | 1104.68            |
| 2011-12 | 17122.87        | 16515.05         | 16354.70           | 2808.54         | 2858.54          | 2831.60            | 1600.00         | 1356.52          | 1243.12            |
| 2012-13 | 20208.00        | 17867.32         | 17730.72           | 3232.00         | 2520.00          | 2519.09            | 1910.00         | 1800.00          | 1736.71            |
| 2013-14 | 21609.00        | 19000.00         | 18721.70           | 3415.00         | 2600.00          | 2599.97            | 2025.00         | 1800.00          | 1748.66            |
| 2014-15 | 22309.00        | 19530.00         | 19191.61           | 3715.00         | 2500.00          | 2456.82            | 2174.00         | 1800.00          | 1738.12            |
| 2015-16 | 16646.35        | 15500.00         | 15028.00           | 3691.00         | 3000.00          | 2988.61            | 1491.14         | 1491.14          | 1410.34            |
| 2016-17 | 20400.00        | 29411.32         | 26639.66           | 3700.00         | 3166.58          | 2989.65            | 1600.00         | 1748.02          | 1743.12            |
| 2017-18 | 41855.00        | 41105.00         | 28908.08*          | 6800.00         | NA               | 3138.06**          | 2371.00         | 2166.74          | 1511.20***         |

Source: Ministry of Agriculture & Farmers Welfare

\* As on 31.12.2017

\*\* As on 31.10.17

\*\*\* As on 31.12.2017

DAC&FW: D/o Agriculture, Cooperation & Farmers Welfare, DARE: D/o Agricultural Research and Education

DAHD&F: D/o Animal Husbandry, Dairying & Fisheries

**Table 2.2: Public Sector Outlays/ Expenditure**

(₹ Crore)

| Sector                            | 2011-12        |               | 12th Plan*     | 2012-13        |               | 2013-14        |                | 2014-15       |               | 2015-16       |               | 2016-17       |
|-----------------------------------|----------------|---------------|----------------|----------------|---------------|----------------|----------------|---------------|---------------|---------------|---------------|---------------|
|                                   | BE             | AE            | Outlays        | BE             | AE            | BE             | RE             | BE(##)        | RE(##)        | BE(##)        | RE(##)        | BE(##)        |
| (1)                               | (2)            | (3)           | (4)            | (5)            | (6)           | (7)            | (8)            | (9)           | (10)          | (11)          | (12)          | (13)          |
| Agriculture and Allied Activities | 46255          | 46037         | 363273         | 56669          | 52521         | 64098          | 61356          | 11531         | 10199         | 11657         | 10942         | 19394         |
| Rural Development                 | 75821          | 37599         | 457464         | 72248          | 66194         | 77307          | 73255          | 3082          | 1877          | 3110          | 3005          | 2623          |
| Special Area Programmes           | 12413          | 0             | 80370          | 15342          | 11289         | 18392          | 18095          | 0             | 0             | 0             | 0             | 0             |
| Irrigation & Flood Control        | 64001          | 506           | 422012         | 72169          | 54394         | 78211          | 71253          | 1797          | 896           | 772           | 1105          | 1024          |
| Energy                            | 208436         | 121855        | 1438466        | 208711         | 179438        | 221095         | 238019         | 166275        | 154878        | 167342        | 171519        | 205877        |
| Industry & Minerals               | 56400          | 36235         | 377302         | 71491          | 46786         | 64602          | 51428          | 40209         | 39397         | 43113         | 45512         | 49371         |
| Transport                         | 171344         | 107532        | 1204172        | 183015         | 145002        | 196628         | 175543         | 116202        | 106242        | 193417        | 178502        | 229874        |
| Communications                    | 20256          | 6586          | 80984          | 15411          | 6289          | 12380          | 9333           | 13009         | 13027         | 12032         | 13451         | 13806         |
| Science, Technology & Environment | 22160          | 11735         | 167350         | 24220          | 18304         | 26874          | 22664          | 18792         | 14821         | 19023         | 17965         | 20926         |
| General Economic Services         | 35179          | 19697         | 305612         | 51525          | 37079         | 63022          | 47660          | 26318         | 17303         | 20333         | 38597         | 46686         |
| Social Services                   | 356713         | 145352        | 2664843        | 419267         | 340266        | 476980         | 443357         | 79411         | 64284         | 81024         | 83555         | 100420        |
| General Services                  | 28226          | 5305          | 107959         | 66040          | 14390         | 71347          | 69060          | 7906          | 3887          | 26558         | 18554         | 16247         |
| <b>Total</b>                      | <b>1097204</b> | <b>538439</b> | <b>7669807</b> | <b>1256108</b> | <b>971951</b> | <b>1370936</b> | <b>1281023</b> | <b>484532</b> | <b>426811</b> | <b>578382</b> | <b>582707</b> | <b>706248</b> |

Source: Economic Survey and Budget Documents, Ministry of Finance.

Note: Figures include Outlays and Expenditure by Centre, States and Union Territories.

## For Centre only as figures for States &amp; UTs are not available. \* 12th Plan Projections.

**Table 2.3: Outlays / Expenditure under Agriculture and Allied Activities**

(₹ Crore)

| Sector                        | 2011-12      |              | 2012-13      |              | 2013-14      |              | 2014-15      |              | 2015-16      |              |
|-------------------------------|--------------|--------------|--------------|--------------|--------------|--------------|--------------|--------------|--------------|--------------|
|                               | BE           | AE           | BE           | RE           | BE           | AE           | BE           | RE           | BE           | RE           |
| (1)                           | (2)          | (3)          | (4)          | (5)          | (6)          | (7)          | (8)          | (9)          | (10)         | (11)         |
| Crop Husbandry                | 7891         | 8066         | 9034         | 8660         | 9876         | 9185         | 4432         | 3857         | 4339         | 4794         |
| Horticulture                  | NA           | NA           | NA           | NA           | NA           | NA           | NA           | NA           | NA           | NA           |
| Soil & Water Conservation     | 15           | 15           | 16           | 15           | 19           | 16           | 18           | 17           | 18           | 17           |
| Animal Husbandry              | 950          | 724          | 1063         | 888          | 975          | 925          | 172          | 151          | 130          | 156          |
| Dairy Development             | 223          | 196          | 353          | 524          | 525          | 502          | 411          | 365          | 482          | 488          |
| Fisheries                     | 270          | 304          | 299          | 297          | 317          | 316          | 423          | 302          | 411          | 392          |
| Forestry & Wild Life          | 786          | 914          | 907          | 806          | 1041         | 884          | 379          | 318          | 275          | 284          |
| Plantation                    | 415          | 595          | 446          | 501          | 458          | 468          | 370          | 347          | 360          | 360          |
| Food Storage & Warehousing    | 644          | 703          | 787          | 764          | 801          | 1222         | 727          | 1169         | 1090         | 639          |
| Agriculture, Research & Edn.  | 2492         | 2573         | 2898         | 2461         | 3113         | 2451         | 3354         | 2211         | 3321         | 2700         |
| Agricultural Financial Inst.  | NA           | NA           | NA           | NA           | NA           | NA           | NA           | NA           | NA           | NA           |
| Cooperation                   | 222          | 124          | 125          | 104          | 121          | 112          | 125          | 99           | 112          | 125          |
| Other Agricultural Programmes | 836          | 1980         | 1764         | 2008         | 1535         | 1707         | 1120         | 1364         | 1120         | 986          |
| <b>Total</b>                  | <b>14744</b> | <b>16194</b> | <b>17692</b> | <b>17030</b> | <b>18781</b> | <b>17788</b> | <b>11531</b> | <b>10199</b> | <b>11657</b> | <b>10942</b> |

Source: 1. Budget Documents, Ministry of Finance.

2. Plan Documents, Planning Commission. For State Outlays, State Plan Division, Planning Commission.

Notes: Totals may not tally due to rounding off.

Figures are for Centre only as separate figures for States &amp; UTs are not available sub-head wise.



**Table 2.4: Plan-wise share of Public Sector Outlays and Expenditure under Agriculture and Allied Activities**

( ₹ Crore)

| Five Year Plan / Annual Plan   | Agriculture and Allied Activities |                    | Total Plan Outlay |                    | % share of Agriculture and Allied Activities |                    |
|--------------------------------|-----------------------------------|--------------------|-------------------|--------------------|----------------------------------------------|--------------------|
|                                | Plan Outlays                      | Actual Expenditure | Plan Outlays      | Actual Expenditure | Plan Outlays                                 | Actual Expenditure |
|                                | (1)                               | (2)                | (3)               | (4)                | (5)                                          | (6)                |
| <b>Ninth Plan (1997-2002)</b>  | <b>42462</b>                      | <b>37239 \$</b>    | <b>859200</b>     | <b>941041 \$</b>   | <b>4.9</b>                                   | <b>4.0</b>         |
| <b>Tenth Plan (2002-07)</b>    | <b>58933</b>                      | <b>60702 \$</b>    | <b>1525639</b>    | <b>1618460 \$</b>  | <b>3.9</b>                                   | <b>3.8</b>         |
| <b>Eleventh Plan (2007-12)</b> | <b>136381</b>                     | <b>163105 \$</b>   | <b>3644718</b>    | <b>3676936 \$</b>  | <b>3.7</b>                                   | <b>4.4</b>         |
| Annual Plan (2007-08)          | 17971                             | 20083              | 558765            | 475012             | 3.2                                          | 4.2                |
| Annual Plan (2008-09)          | 27270                             | 27117              | 684288            | 628161             | 4.0                                          | 4.3                |
| Annual Plan (2009-10)          | 28772                             | 29498              | 794616            | 717035             | 3.6                                          | 4.1                |
| Annual Plan (2010-11)          | 36983                             | 40370              | 929725            | 826268             | 4.0                                          | 4.9                |
| Annual Plan (2011-12)          | 46255                             | 46037              | 1097204           | 1030461            | 4.2                                          | 4.5                |
| <b>Twelfth Plan (2012-17)*</b> | <b>363273</b>                     | <b>NA</b>          | <b>7669807</b>    | <b>NA</b>          | <b>4.7</b>                                   | <b>N.A</b>         |
| Annual Plan (2012-13)          | 56669                             | 52521              | 1251715           | 971951             | 4.5                                          | 5.4                |
| Annual Plan (2013-14)          | 64098                             | 61356(RE)          | 1370936           | 1281022(RE)        | 4.7                                          | 4.8                |
| Annual Plan (2014-15)#         | 11531                             | 9795               | 484532            | 420882             | 2.4                                          | 2.4                |
| Annual Plan (2015-16)#         | 11657                             | 10942(RE)          | 578382            | 582707(RE)         | 2.0                                          | 1.9                |
| Annual Plan (2016-17)#         | 19394                             | NA                 | 706248            | NA                 | NA                                           | NA                 |

Source: Economic Survey and Budget Documents, Ministry of Finance

Notes:

1. Figures include Outlays and Expenditure by Centre, States and Union Territories.

2. Actual Central Expenditure figures are including IEBR from 2009-10 onwards

\* 12th Plan projections (At current prices).

# For Centre only as figures for States & UTs are not yet available.

\$ Indicates 9th, 10th and 11th Plan Realization.

**Table 2.5: Comparison of States Outlay and Expenditure for Eleventh and Twelfth Plan**

(₹ in crore at current prices)

| State               | Eleventh Plan Outlay          |                 | Eleventh Plan Expenditure     |                 | Twelfth Plan Outlay           |                 |                                                             |
|---------------------|-------------------------------|-----------------|-------------------------------|-----------------|-------------------------------|-----------------|-------------------------------------------------------------|
|                     | Agriculture and Allied Sector | % of Total Plan | Agriculture and Allied Sector | % of Total Plan | Agriculture and Allied Sector | % of Total Plan | Increase in Twelfth Plan over Eleventh Plan Expenditure (%) |
| (1)                 | (2)                           | (3)             | (4)                           | (5)             | (6)                           | (7)             | (8)                                                         |
| Andhra Pradesh      | 3487.44                       | 2.4             | 9510.46                       | 6.0             | 17138                         | 5               | 80                                                          |
| Arunachal Pradesh   | 752                           | 9.5             | 617.71                        | 5.7             | 1114                          | 5.3             | 80                                                          |
| Assam               | 877.86                        | 2.1             | 2335.56                       | 7.8             | 3272                          | 5.9             | 40                                                          |
| Bihar               | 3672.73                       | 4.8             | 4805.33                       | 6.3             | 15613                         | 6               | 225                                                         |
| Chhattisgarh        | 4613                          | 8.6             | 5637                          | 12.7            | 8284                          | 6.9             | 47                                                          |
| Goa                 | 211.76                        | 2.5             | 325.39                        | 3.6             | 1046                          | 3.9             | 221                                                         |
| Gujarat             | 9092.94                       | 0.7             | 8879.8                        | 6.9             | 19712                         | 7.8             | 122                                                         |
| Haryana             | 1638.82                       | 4.7             | 2733.02                       | 5.7             | 6288                          | 5.4             | 130                                                         |
| Himachal Pradesh    | 1470.08                       | 10.7            | 1642.82                       | 12.1            | 2174                          | 9.7             | 32                                                          |
| Jammu & Kashmir     | 1818.21                       | 7               | 892.98                        | 3.5             | 2843                          | 9.7             | 218                                                         |
| Jharkhand           | 3130.53                       | 0.8             | 2319.85                       | 5.9             | 4157                          | 3.8             | 79                                                          |
| Karnataka           | 8426.85                       | 8.3             | 10484.4                       | 7.7             | 19824                         | 8.9             | 89                                                          |
| Kerala              | 2649.11                       | 7.8             | 2931.54                       | 7.6             | 8831                          | 11.5            | 201                                                         |
| Madhya Pradesh      | 3408.18                       | 4.8             | 6057.09                       | 7.3             | 17076                         | 8.5             | 182                                                         |
| Maharashtra         | 9507.64                       | 5.9             | 10636.4                       | 7.3             | 19325                         | 7.03            | 82                                                          |
| Manipur             | 386.55                        | 4.7             | 234.04                        | 3.2             | 643                           | 3.1             | 175                                                         |
| Meghalaya           | 735.52                        | 8               | 845.2                         | 9.8             | 2114                          | 10.7            | 150                                                         |
| Mizoram             | 536.31                        | 9.6             | 387.86                        | 7.1             | 346                           | 2.8             | -                                                           |
| Odisha              | 1230.29                       | 3.8             | 3580.37                       | 8.2             | 8387                          | 7.4             | 134                                                         |
| Nagaland            | 434.31                        | 8.3             | 725.08                        | 11.3            | 1795                          | 13.8            | 148                                                         |
| Punjab              | 1309.13                       | 4.5             | 1410.77                       | 4               | 1524                          | 2.9             | 8                                                           |
| Rajasthan           | 2919.07                       | 4.1             | 5990.67                       | 6.2             | 7255                          | 5.6             | 21                                                          |
| Sikkim              | 260.43                        | 6.9             | 228.27                        | 6.4             | 469                           | 4.1             | 106                                                         |
| Tamil Nadu          | 7831.57                       | 9.2             | 8170.01                       | 8.8             | 20680                         | 10              | 153                                                         |
| Tripura             | 798.51                        | 9               | 858.79                        | 11.3            | 980                           | 6.8             | 14                                                          |
| Uttar Pradesh       | 19146.37                      | 10.6            | 14164.8                       | 7.8             | 24354                         | 8.5             | 72                                                          |
| Uttarakhand         | 2478.5                        | 8.4             | 2079.25                       | 10              | 2673                          | 5.9             | 29                                                          |
| West Bengal         | 1846.5                        | 2.9             | 3339.26                       | 5.1             | 8583                          | 5.5             | 157                                                         |
| <b>Total States</b> | <b>94670.21</b>               | <b>3.6</b>      | <b>111823.72</b>              | <b>7.2</b>      | <b>226500</b>                 | <b>7.1</b>      | <b>103</b>                                                  |

Source: 12<sup>th</sup> Plan Document, Planning Commission

**Table 2.6: Expenditure on Agricultural Research and Education**

(₹ Crore at 2006-07 prices)

| State/ Centre                               |                 | Tenth Plan   | 2007-08     | 2008-09     | 2009-10     | 2010-11     | 2011-12     | Eleventh Plan |
|---------------------------------------------|-----------------|--------------|-------------|-------------|-------------|-------------|-------------|---------------|
| (1)                                         | (2)             | (3)          | (4)         | (5)         | (6)         | (7)         | (8)         | (9)           |
| State                                       | Plan            | 4151         | 694         | 965         | 1070        | 1289        | 1382        | 5401          |
|                                             | Non-Plan        | 6477         | 1464        | 1315        | 1497        | 1755        | 1599        | 7629          |
|                                             | <b>Total</b>    | <b>10629</b> | <b>2158</b> | <b>2279</b> | <b>2567</b> | <b>3044</b> | <b>2981</b> | <b>13030</b>  |
| Centre                                      | Plan            | 4977         | 1210        | 1418        | 1402        | 1909        | 1998        | 7938          |
|                                             | Non-Plan        | 4125         | 852         | 1040        | 1235        | 2168        | 1512        | 6808          |
|                                             | <b>Total</b>    | <b>9102</b>  | <b>2063</b> | <b>2458</b> | <b>2636</b> | <b>4077</b> | <b>3510</b> | <b>14745</b>  |
| RKVY                                        | Plan            | -            | 55          | 197         | 63          | 100         | 160         | 576           |
| <b>Centre and States</b>                    | <b>Plan</b>     | <b>9128</b>  | <b>1961</b> | <b>2580</b> | <b>2534</b> | <b>3298</b> | <b>3540</b> | <b>13914</b>  |
|                                             | <b>Non-Plan</b> | <b>10603</b> | <b>2316</b> | <b>2355</b> | <b>2732</b> | <b>3923</b> | <b>3111</b> | <b>14437</b>  |
|                                             | <b>Total</b>    | <b>19732</b> | <b>4277</b> | <b>4935</b> | <b>5266</b> | <b>7221</b> | <b>6652</b> | <b>28351</b>  |
| GDP Agriculture and Allied (2006-07 prices) |                 | 3340648      | 764890      | 765601      | 773565      | 827969      | 850812      | 3982837       |
| Research/Education as % GDP Agriculture     |                 | 0.59%        | 0.55%       | 0.61%       | 0.67%       | 0.86%       | 0.76%       | 0.70%         |

Source: 12<sup>th</sup> Plan Document, Planning Commission

**Table 2.7: Share (%) of Gross Capital Formation (GCF) to Gross Value Added (GVA) in Agriculture & Allied Sectors (Based on 2011-12 Series)**

| Year    | (Percentage)      |         |       |                   |         |       |
|---------|-------------------|---------|-------|-------------------|---------|-------|
|         | At 2011-12 Prices |         |       | At Current Prices |         |       |
|         | Public            | Private | Total | Public            | Private | Total |
| (1)     | (2)               | (3)     | (4)   | (5)               | (6)     | (7)   |
| 2011-12 | 2.4               | 15.9    | 18.2  | 2.4               | 15.9    | 18.3  |
| 2012-13 | 2.4               | 14.1    | 16.5  | 2.4               | 14.0    | 16.3  |
| 2013-14 | 2.1               | 15.6    | 17.7  | 2.1               | 15.1    | 17.2  |
| 2014-15 | 2.3               | 15.0    | 17.3  | 2.3               | 14.1    | 16.3  |
| 2015-16 | 2.8               | 13.6    | 16.4  | 2.8               | 12.6    | 15.4  |
| 2016-17 | 2.7               | 12.8    | 15.5  | 2.6               | 11.2    | 13.8  |

Source : Central Statistics Office

**Table 2.8: Public and Private Investment in Agriculture and Allied Sectors in Total GDP at Market Prices (Based on 2011-12 Series)**

| Year    | Public and Private Investment in Agriculture and Allied Sectors in Total GDP at Market Prices |                    |        |                     |                    |         |       | ( ₹ Crore) |
|---------|-----------------------------------------------------------------------------------------------|--------------------|--------|---------------------|--------------------|---------|-------|------------|
|         | Public Investment                                                                             | Private Investment | Total  | GDP at market price | Share (%) in Total |         |       |            |
|         | (2)                                                                                           | (3)                | (4)    | (5)                 | Public             | Private | Total |            |
| (1)     | (2)                                                                                           | (3)                | (4)    | (5)                 | (6)                | (7)     | (8)   |            |
| 2011-12 | 35696                                                                                         | 238175             | 273871 | 8736329             | 0.4                | 2.7     | 3.1   |            |
| 2012-13 | 36019                                                                                         | 215075             | 251094 | 9213017             | 0.4                | 2.4     | 2.7   |            |
| 2013-14 | 33925                                                                                         | 250499             | 284424 | 9801370             | 0.3                | 2.6     | 2.9   |            |
| 2014-15 | 36714                                                                                         | 240700             | 277414 | 10536984            | 0.3                | 2.3     | 2.6   |            |
| 2015-16 | 44957                                                                                         | 220081             | 265038 | 11381002            | 0.4                | 1.9     | 2.3   |            |
| 2016-17 | 45981                                                                                         | 219371             | 265352 | 12196006            | 0.4                | 1.8     | 2.2   |            |

Source : Central Statistics Office(CSO)

# LABOUR FORCE, POVERTY AND UNEMPLOYMENT

**Table 3.1: Population and Agricultural Workers**

| Year | Total Population | Average Annual Exponential Growth Rate (%) | Rural Population | Total Workers | Agricultural Workers (Million) |                        |                 |
|------|------------------|--------------------------------------------|------------------|---------------|--------------------------------|------------------------|-----------------|
|      |                  |                                            |                  |               | Cultivators                    | Agricultural Labourers | Total           |
| (1)  | (2)              | (3)                                        | (4)              | (5)           | (6)                            | (7)                    | (8)             |
| 1951 | 361.1            | 1.25                                       | 298.6<br>(82.7)  | 139.5         | 69.9<br>(71.9)                 | 27.3<br>(28.1)         | 97.2<br>(69.7)  |
| 1961 | 439.2            | 1.96                                       | 360.3<br>(82.0)  | 188.7         | 99.6<br>(76.0)                 | 31.5<br>(24.0)         | 131.1<br>(69.5) |
| 1971 | 548.2            | 2.20                                       | 439.0<br>(80.1)  | 180.4         | 78.2<br>(62.2)                 | 47.5<br>(37.8)         | 125.7<br>(69.7) |
| 1981 | 683.3            | 2.22                                       | 525.6<br>(76.9)  | 244.6         | 92.5<br>(62.5)                 | 55.5<br>(37.5)         | 148.0<br>(60.5) |
| 1991 | 846.4            | 2.16                                       | 630.6<br>(74.5)  | 314.1         | 110.7<br>(59.7)                | 74.6<br>(40.3)         | 185.3<br>(59.0) |
| 2001 | 1028.7           | 1.97                                       | 742.6<br>(72.2)  | 402.2         | 127.3<br>(54.4)                | 106.8<br>(45.6)        | 234.1<br>(58.2) |
| 2011 | 1210.9           | 1.50                                       | 833.7<br>(68.9)  | 481.9         | 118.8<br>(45.1)                | 144.3<br>(54.9)        | 263.1<br>(54.6) |

Source: Registrar General of India.

1. For 2001, figures include estimated figures for those of the three sub-divisions viz. Mao Maram, Paomata and Purul of Senapati district of Manipur as census results of 2001 Census in these three sub-divisions were cancelled due to technical and administrative reasons.

2. The 1991 Census could not be held owing to disturbed conditions prevailing in Jammu & Kashmir. Hence the population figures for 1991 of Jammu & Kashmir have been worked out by 'interpolation'. The data on workers in Col. 5-7 exclude J&K.

3. The 1981 census could not be held in Assam. The figures for 1981 for Assam have been worked out by interpolation. The data on workers in Col. 5-7 exclude Assam.

4. Figures within parentheses in Col.-4 are percentages to the Total Population.

5. Figures within parentheses in Col.-5 and 6 are percentages to Col.-7.

6. Figures within parentheses in Col.-8 is percentage share of Agricultural Workers in Total Workers.



**Table 3.2: Population & Labour Force Projections**

| Year                                   | (Percent per annum) |        |        |        |        |        |        |
|----------------------------------------|---------------------|--------|--------|--------|--------|--------|--------|
|                                        | 2011                | 2012   | 2013   | 2014   | 2015   | 2016   | 2017   |
| (1)                                    | (2)                 | (3)    | (4)    | (5)    | (5)    | (6)    | (7)    |
| Total Population (0+) (in million)     | 1210.2              | 1227.1 | 1244.0 | 1260.6 | 1277.1 | 1293.5 | 1309.7 |
| 15 & above Population (%)              | 70.2                | 71.0   | 71.8   | 72.6   | 73.4   | 74.2   | 75.0   |
| Population ( 15 & above) ( in million) | 849.6               | 871.3  | 893.2  | 915.2  | 937.4  | 959.8  | 982.2  |
| LFPR for 15 and above age group (%)    | 56.3                | 55.4   | 54.5   | 53.7   | 52.8   | 52.0   | 51.2   |
| Labour Force (15 & above) (in million) | 477.9               | 482.7  | 487.2  | 491.5  | 495.4  | 499.1  | 502.4  |

Source: 12th Plan Document, Planning Commission

**Table 3.3: Population Below Poverty Line (Tendulkar Methodology)**

(Percentage)

| States/UTs           | 2009-10      |              |              | 2011-12      |              |              |
|----------------------|--------------|--------------|--------------|--------------|--------------|--------------|
|                      | Rural        | Urban        | Total        | Rural        | Urban        | Total        |
| (1)                  | (2)          | (3)          | (4)          | (5)          | (6)          | (7)          |
| Andhra Pradesh       | 22.80        | 17.70        | 21.10        | 10.96        | 5.81         | 9.20         |
| Arunachal Pradesh    | 26.20        | 24.90        | 25.90        | 38.93        | 20.33        | 34.67        |
| Assam                | 39.90        | 26.10        | 37.90        | 33.89        | 20.49        | 31.98        |
| Bihar                | 55.30        | 39.40        | 53.50        | 34.06        | 31.23        | 33.74        |
| Chhattisgarh         | 56.10        | 23.80        | 48.70        | 44.61        | 24.75        | 39.93        |
| Delhi                | 7.70         | 14.40        | 14.20        | 12.92        | 9.84         | 9.91         |
| Goa                  | 11.50        | 6.90         | 8.70         | 6.81         | 4.09         | 5.09         |
| Gujarat              | 26.70        | 17.90        | 23.00        | 21.54        | 10.14        | 16.63        |
| Haryana              | 18.60        | 23.00        | 20.10        | 11.64        | 10.28        | 11.16        |
| Himachal Pradesh     | 9.10         | 12.60        | 9.50         | 8.48         | 4.33         | 8.06         |
| Jammu & Kashmir      | 8.10         | 12.80        | 9.40         | 11.54        | 7.20         | 10.35        |
| Jharkhand            | 41.60        | 31.10        | 39.10        | 40.84        | 24.83        | 36.96        |
| Karnataka            | 26.10        | 19.60        | 23.60        | 24.53        | 15.25        | 20.91        |
| Kerala               | 12.00        | 12.10        | 12.00        | 9.14         | 4.97         | 7.05         |
| Madhya Pradesh       | 42.00        | 22.90        | 36.70        | 35.74        | 21.00        | 31.65        |
| Maharashtra          | 29.50        | 18.30        | 24.50        | 24.22        | 9.12         | 17.35        |
| Manipur              | 47.40        | 46.40        | 47.10        | 38.80        | 32.59        | 36.89        |
| Meghalaya            | 15.30        | 24.10        | 17.10        | 12.53        | 9.26         | 11.87        |
| Mizoram              | 31.10        | 11.50        | 21.10        | 35.43        | 6.36         | 20.40        |
| Nagaland             | 19.30        | 25.00        | 20.90        | 19.93        | 16.48        | 18.88        |
| Odisha               | 39.20        | 25.90        | 37.00        | 35.69        | 17.29        | 32.59        |
| Punjab               | 14.60        | 18.10        | 15.90        | 7.66         | 9.24         | 8.26         |
| Rajasthan            | 26.40        | 19.90        | 24.80        | 16.05        | 10.69        | 14.71        |
| Sikkim               | 15.50        | 5.00         | 13.10        | 9.85         | 3.66         | 8.19         |
| Tamil Nadu           | 21.20        | 12.80        | 17.10        | 15.83        | 6.54         | 11.28        |
| Tripura              | 19.80        | 10.00        | 17.40        | 16.53        | 7.42         | 14.05        |
| Uttar Pradesh        | 39.40        | 31.70        | 37.70        | 30.40        | 26.06        | 29.43        |
| Uttarakhand          | 14.90        | 25.20        | 18.00        | 11.62        | 10.48        | 11.26        |
| West Bengal          | 28.80        | 22.00        | 26.70        | 22.52        | 14.66        | 19.98        |
| A&N Islands          | 0.40         | 0.30         | 0.40         | 1.57         | 0.00         | 1.00         |
| Chandigarh           | 10.30        | 9.20         | 9.20         | 1.64         | 22.31        | 21.81        |
| Dadra & Nagar Haveli | 55.90        | 17.70        | 39.10        | 62.59        | 15.38        | 39.31        |
| Damn & Diu           | 34.20        | 33.00        | 33.30        | 0.00         | 12.62        | 9.86         |
| Lakshadweep          | 22.20        | 1.70         | 6.80         | 0.00         | 3.44         | 2.77         |
| Puducherry           | 0.20         | 1.60         | 1.20         | 17.06        | 6.30         | 9.69         |
| <b>All-India</b>     | <b>33.80</b> | <b>20.90</b> | <b>29.80</b> | <b>25.70</b> | <b>13.70</b> | <b>21.92</b> |

Source: Perspective Planning Division, Planning Commission.

- Poverty estimates are based on methodology suggested by the expert group on Methodology for estimation of poverty, chaired by Dr. Suresh.D. Tendulkar
- Number of persons below poverty line in 2009-10 are estimated based on Population as on 1st March 2010 (interpolated between 2001 and 2011 population Census)
- Number of persons below poverty line in 2011-12 are estimated based on Population as on 1st March 2012 (2011 Census population extrapolated)
- Poverty line of Tamil Nadu is used for Andaman and Nicobar Island.
- Urban Poverty Line of Punjab is used for both rural and urban areas of Chandigarh.
- Poverty Line of Maharashtra is used for Dadra & Nagar Haveli.
- Poverty Line of Goa is used for Daman & Diu
- Poverty Line of Kerala is used for Lakshadweep.

**Table 3.4: All India Rural & Urban Unemployment Rates (2011-12)**

(Percentage)

| Estimates              | Rural |        |     | Urban |        |     | Rural+ Urban |        |      |
|------------------------|-------|--------|-----|-------|--------|-----|--------------|--------|------|
|                        | Male  | Female | M+F | Male  | Female | M+F | Male         | Female | M+F  |
| (1)                    | (2)   | (3)    | (4) | (5)   | (6)    | (7) | (8)          | (9)    | (10) |
| Usual Principal Status | 2.1   | 3.0    | 2.3 | 3.2   | 6.4    | 3.8 | 2.5          | 3.8    | 2.8  |
| Usual Status           | 1.8   | 1.6    | 1.7 | 3.0   | 5.2    | 3.5 | 2.2          | 2.4    | 2.2  |
| Current Weekly Status  | 3.3   | 3.5    | 3.4 | 3.8   | 6.9    | 4.4 | 3.5          | 4.3    | 3.7  |
| Current Daily Status   | 5.5   | 6.2    | 5.7 | 4.9   | 7.9    | 5.4 | 5.3          | 6.7    | 5.6  |

Source: NSSO Report (68<sup>th</sup> Round)- Employment and Unemployment Situation in India, 2011-12

# AGRICULTURAL LAND-USE STATISTICS

**Table 4.1: Agricultural Land by use in India**

|            |                                                       | (Million Hectares) |               |               |               |               |               |               |               |               |
|------------|-------------------------------------------------------|--------------------|---------------|---------------|---------------|---------------|---------------|---------------|---------------|---------------|
| S.No.      | Classification                                        | 1950-51            | 1990-91       | 2000-01       | 2009-10       | 2010-11       | 2011-12       | 2012-13       | 2013-14       | 2014-15       |
| (1)        | (2)                                                   | (3)                | (4)           | (5)           | (P) (6)       | (P) (7)       | (P) (8)       | (P) (9)       | (P) (10)      | (P) (11)      |
| <b>I.</b>  | <b>Geographical Area</b>                              | <b>328.73</b>      | <b>328.73</b> | <b>328.73</b> | <b>328.73</b> | <b>328.73</b> | <b>328.73</b> | <b>328.73</b> | <b>328.73</b> | <b>328.73</b> |
| <b>II.</b> | <b>Reporting Area for Land Utilisation Statistics</b> | <b>284.32</b>      | <b>304.86</b> | <b>305.19</b> | <b>307.41</b> | <b>307.48</b> | <b>307.39</b> | <b>307.49</b> | <b>307.80</b> | <b>307.82</b> |
| 1.         | Forest                                                | 40.48              | 67.81         | 69.84         | 71.56         | 71.59         | 71.60         | 71.57         | 71.83         | 71.79         |
| 2.         | Not Available for Cultivation (A+B)                   | 47.52              | 40.48         | 41.23         | 43.33         | 43.58         | 43.53         | 43.58         | 43.86         | 43.88         |
|            | (A) Area Under Non-agricultural Uses                  | 9.36               | 21.09         | 23.75         | 26.16         | 26.40         | 26.31         | 26.50         | 26.91         | 26.88         |
|            | (B) Barren & Un-culturable Land                       | 38.16              | 19.39         | 17.48         | 17.18         | 17.18         | 17.22         | 17.07         | 16.95         | 17.00         |
| 3.         | Other Uncultivated land excluding Fallow              | 49.45              | 30.22         | 27.74         | 26.50         | 26.15         | 26.11         | 26.08         | 25.83         | 25.83         |
|            | (A) Permanent Pasture & other Grazing Land            | 6.68               | 11.40         | 10.66         | 10.34         | 10.30         | 10.31         | 10.26         | 10.26         | 10.26         |
|            | (B) Land under Miscellaneous Tree Crops &             | 19.83              | 3.82          | 3.44          | 3.21          | 3.20          | 3.16          | 3.18          | 3.19          | 3.10          |
|            | (C) Culturable Waste Land                             | 22.94              | 15.00         | 13.63         | 12.95         | 12.65         | 12.64         | 12.64         | 12.39         | 12.47         |
| 4.         | Fallow Lands (A+B)                                    | 28.12              | 23.37         | 25.04         | 26.85         | 24.60         | 25.18         | 26.32         | 24.85         | 26.18         |
|            | (A) Fallow Lands other than Current Fallows           | 17.45              | 9.66          | 10.27         | 10.84         | 10.32         | 10.67         | 11.04         | 10.69         | 11.09         |
|            | (B) Current Fallows                                   | 10.68              | 13.70         | 14.78         | 16.01         | 14.28         | 14.51         | 15.29         | 14.15         | 15.09         |
| 5.         | Net Area Sown (6-7)                                   | 118.75             | 143.00        | 141.34        | 139.17        | 141.56        | 140.98        | 139.94        | 141.43        | 140.13        |
| 6.         | Total Cropped Area (Gross Cropped Area)               | 131.89             | 185.74        | 185.34        | 189.19        | 197.68        | 195.80        | 194.25        | 200.95        | 198.36        |
| 7.         | Area Sown more than once                              | 13.15              | 42.74         | 44.00         | 50.02         | 56.12         | 54.82         | 54.31         | 59.52         | 58.23         |
| 8.         | Cropping Intensity*                                   | 111.07             | 129.89        | 131.13        | 135.94        | 139.64        | 138.88        | 138.81        | 142.09        | 141.55        |
|            | <b>Net Irrigated Area</b>                             | <b>20.85</b>       | <b>48.02</b>  | <b>55.20</b>  | <b>61.94</b>  | <b>63.67</b>  | <b>65.71</b>  | <b>66.29</b>  | <b>68.12</b>  | <b>68.38</b>  |
|            | <b>Gross Irrigated Area</b>                           | <b>22.56</b>       | <b>63.20</b>  | <b>76.19</b>  | <b>85.09</b>  | <b>88.94</b>  | <b>91.79</b>  | <b>92.25</b>  | <b>95.77</b>  | <b>96.46</b>  |

\* Cropping Intensity is percentage of Gross Cropped Area to Net Area Sown.

(P) Provisional

Notes:

1. In 2009-10 there is significant decline in Total Cropped Area and Net Area Sown due to decline in net area sown in the states of Andhra Pradesh, Bihar, Jharkhand, Rajasthan, Tamil Nadu, Uttar Pradesh and West Bengal. This was mainly due to deficient rainfall.

Source: Land-Use Statistics 2014-15, Directorate of Economics & Statistics, DAC&FW

**Chart 4 (a): Agriculture Land by Use in India**

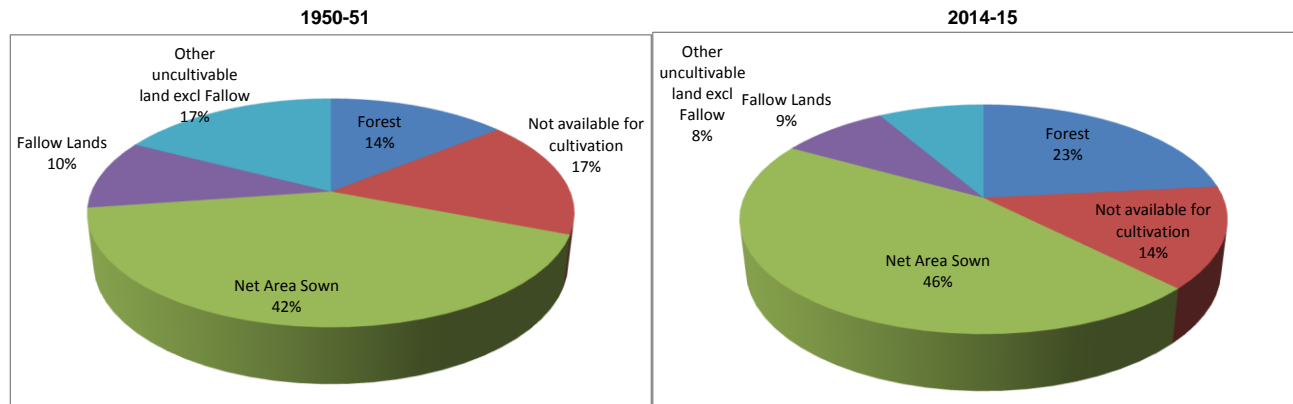

Source: Directorate of Economics & Statistics, DAC&FW

**Chart 4 (b): Changes in Gross Cropped and Gross Irrigated Areas**

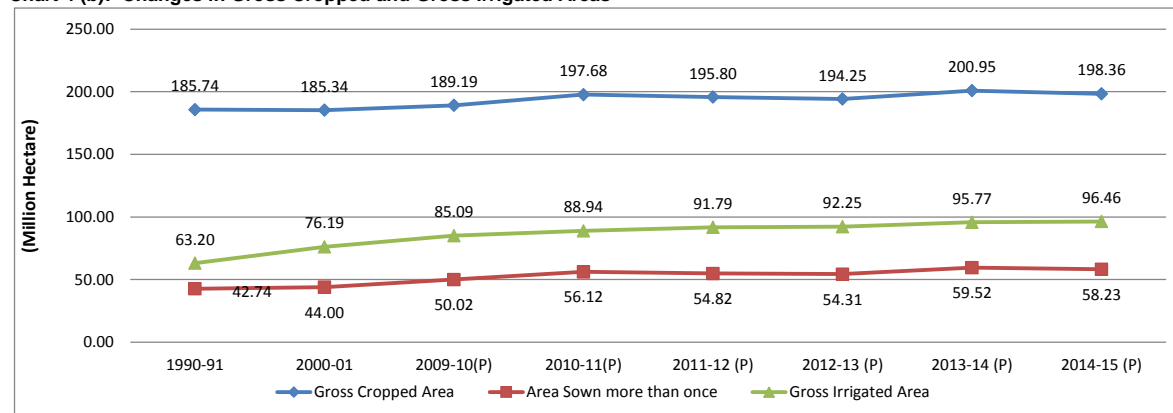

Source: Directorate of Economics & Statistics, DAC&FW

**Table 4.2: Percentage Distribution of Gross Cropped Area**

| Crops                                    | 1950-51     | 1960-61     | 1970-71     | 1980-81     | 1990-91     | 2000-01     | 2010-11<br>(P) | 2011-12<br>(P) | 2012-13<br>(P) | 2013-14<br>(P) | 2014-15<br>(P) |
|------------------------------------------|-------------|-------------|-------------|-------------|-------------|-------------|----------------|----------------|----------------|----------------|----------------|
| (1)                                      | (2)         | (3)         | (4)         | (5)         | (6)         | (7)         | (8)            | (9)            | (10)           | (11)           | (12)           |
| Rice                                     | 23.5        | 22.3        | 22.5        | 23.3        | 23.0        | 24.2        | 21.9           | 22.3           | 22.0           | 22.1           | 22.3           |
| Jowar                                    | 11.8        | 12.1        | 10.2        | 9.5         | 7.6         | 5.3         | 3.7            | 3.2            | 3.2            | 2.9            | 3.1            |
| Bajra                                    | 7.4         | 7.5         | 8.1         | 6.8         | 5.8         | 5.4         | 4.9            | 4.5            | 3.9            | 4.0            | 4.0            |
| Maize                                    | 2.5         | 2.9         | 3.5         | 3.5         | 3.2         | 3.7         | 4.3            | 4.4            | 4.4            | 4.5            | 4.4            |
| Ragi/Marua                               | 1.7         | 1.6         | 1.5         | 1.5         | 1.2         | 1.0         | 0.6            | 0.6            | 0.6            | 0.6            | 0.6            |
| Wheat                                    | 7.6         | 8.5         | 11.0        | 12.9        | 12.9        | 13.9        | 15.2           | 15.4           | 15.7           | 15.6           | 16.2           |
| Barley                                   | 2.4         | 2.1         | 1.5         | 1.0         | 0.5         | 0.4         | 0.4            | 0.3            | 0.4            | 0.3            | 0.4            |
| Other Cereals & Millets                  | 4.2         | 3.3         | 3.0         | 2.3         | 1.3         | 0.8         | 0.4            | 0.4            | 0.4            | 0.4            | 0.3            |
| <b>Total Cereals &amp; Millets</b>       | <b>61.1</b> | <b>60.2</b> | <b>61.4</b> | <b>60.8</b> | <b>55.5</b> | <b>54.7</b> | <b>51.4</b>    | <b>51.1</b>    | <b>50.7</b>    | <b>50.4</b>    | <b>51.3</b>    |
| Gram                                     | 5.9         | 6.1         | 4.7         | 3.8         | 4.0         | 2.9         | 4.4            | 4.0            | 4.1            | 4.7            | 3.9            |
| Tur or Arhar                             | 1.7         | 1.6         | 1.6         | 1.7         | 1.9         | 2.0         | 2.1            | 1.9            | 1.8            | 1.8            | 1.7            |
| Other pulses (Excl. Gram & Tur or Arhar) | 8.0         | 7.8         | 7.6         | 7.7         | 7.4         | 6.7         | 6.3            | 6.1            | 5.4            | 5.4            | 5.4            |
| <b>Total Pulses</b>                      | <b>15.6</b> | <b>15.5</b> | <b>13.9</b> | <b>13.2</b> | <b>13.4</b> | <b>11.5</b> | <b>12.8</b>    | <b>12.0</b>    | <b>11.3</b>    | <b>11.8</b>    | <b>10.9</b>    |
| <b>Total Foodgrains</b>                  | <b>76.7</b> | <b>75.6</b> | <b>75.3</b> | <b>73.9</b> | <b>68.9</b> | <b>66.2</b> | <b>64.3</b>    | <b>63.1</b>    | <b>62.0</b>    | <b>62.3</b>    | <b>62.3</b>    |
| Sugar-cane                               | 1.3         | 1.6         | 1.6         | 1.7         | 2.1         | 2.5         | 2.6            | 2.8            | 2.8            | 2.7            | 2.8            |
| Total Condi-ments and Spices             | 0.9         | 1.0         | 1.1         | 1.2         | 1.3         | 1.5         | 1.7            | 1.9            | 1.7            | 1.6            | 1.7            |
| Total Fruits & Vege-tables               | 1.7         | 1.7         | 2.2         | 2.9         | 3.6         | 4.4         | 4.8            | 4.9            | 4.9            | 4.9            | 5.0            |
| Other Food Crops                         | 0.5         | 0.8         | 0.1         | 0.1         | 0.1         | 0.1         | 0.1            | 0.1            | 0.1            | 0.1            | 0.1            |
| <b>Total Food Crops</b>                  | <b>81.2</b> | <b>80.8</b> | <b>80.3</b> | <b>79.7</b> | <b>75.9</b> | <b>74.7</b> | <b>73.4</b>    | <b>72.7</b>    | <b>71.5</b>    | <b>71.7</b>    | <b>72.0</b>    |
| Ground-nut                               | 3.3         | 4.2         | 4.6         | 3.9         | 4.5         | 3.6         | 2.9            | 2.7            | 2.7            | 2.7            | 2.6            |
| Castor- seed                             | 0.4         | 0.3         | 0.3         | 0.3         | 0.5         | 0.6         | 0.5            | 0.7            | 0.6            | 0.5            | 0.5            |
| Sesamum                                  | 1.5         | 1.0         | 1.1         | 1.0         | 1.3         | 0.9         | 1.1            | 1.0            | 0.9            | 0.8            | 0.9            |
| Rape-seed & Mustard                      | 0.8         | 0.7         | 0.9         | 1.3         | 2.8         | 2.3         | 2.8            | 2.8            | 3.1            | 3.0            | 2.7            |
| Lin-seed                                 | 0.9         | 0.8         | 0.7         | 0.7         | 0.5         | 0.3         | 0.1            | 0.1            | 0.1            | 0.1            | 0.1            |
| Coco-nut                                 | 0.5         | 0.5         | 0.6         | 0.6         | 0.8         | 1.0         | 0.9            | 1.0            | 1.0            | 0.9            | 1.0            |
| Other Oilseeds                           | 0.8         | 0.7         | 0.7         | 1.2         | 3.2         | 4.6         | 6.3            | 6.1            | 6.5            | 6.9            | 6.5            |
| <b>Total Oilseeds</b>                    | <b>8.3</b>  | <b>8.4</b>  | <b>8.9</b>  | <b>9.1</b>  | <b>13.5</b> | <b>13.3</b> | <b>14.6</b>    | <b>14.3</b>    | <b>14.9</b>    | <b>15.0</b>    | <b>14.3</b>    |
| Cotton                                   | 4.3         | 5.0         | 4.7         | 4.5         | 4.1         | 4.6         | 5.5            | 6.2            | 6.1            | 5.9            | 6.4            |
| Jute                                     | 0.4         | 0.4         | 0.5         | 0.5         | 0.4         | 0.5         | 0.4            | 0.4            | 0.4            | 0.4            | 0.4            |
| Other Fibres                             | 0.3         | 0.3         | 0.3         | 0.3         | 0.2         | 0.2         | 0.1            | 0.1            | 0.1            | 0.1            | 0.1            |
| <b>Total Fibres</b>                      | <b>5.1</b>  | <b>5.7</b>  | <b>5.5</b>  | <b>5.3</b>  | <b>4.7</b>  | <b>5.2</b>  | <b>6.0</b>     | <b>6.7</b>     | <b>6.6</b>     | <b>6.4</b>     | <b>6.8</b>     |
| Indigo                                   | 0.0         | 0.0         | 0.0         | 0.0         | 0.0         | 0.0         | 0.0            | 0.0            | 0.0            | 0.0            | 0.0            |
| Opium                                    | 0.0         | 0.0         | 0.0         | 0.0         | 0.0         | 0.0         | 0.0            | 0.0            | 0.0            | 0.0            | 0.0            |
| Tobacco                                  | 0.3         | 0.3         | 0.3         | 0.3         | 0.2         | 0.2         | 0.2            | 0.2            | 0.2            | 0.2            | 0.2            |
| Tea                                      | 0.2         | 0.2         | 0.2         | 0.2         | 0.2         | 0.3         | 0.3            | 0.3            | 0.3            | 0.3            | 0.3            |
| Coffee                                   | 0.1         | 0.1         | 0.1         | 0.1         | 0.2         | 0.2         | 0.2            | 0.2            | 0.2            | 0.2            | 0.2            |
| Fodder Crops                             | 3.3         | 3.8         | 4.2         | 4.7         | 4.5         | 5.0         | 3.9            | 4.0            | 4.8            | 4.9            | 4.6            |
| Other Non-Food Crops                     | 1.5         | 0.8         | 0.4         | 0.5         | 0.8         | 1.1         | 0.7            | 1.6            | 1.4            | 1.4            | 1.5            |
| <b>Total non-food crops</b>              | <b>18.8</b> | <b>19.2</b> | <b>19.6</b> | <b>20.2</b> | <b>24.1</b> | <b>25.3</b> | <b>26.6</b>    | <b>27.3</b>    | <b>28.5</b>    | <b>28.3</b>    | <b>28.0</b>    |
| <b>Total area under crops</b>            | <b>100</b>  | <b>100</b>  | <b>100</b>  | <b>100</b>  | <b>100</b>  | <b>100</b>  | <b>100.0</b>   | <b>100.0</b>   | <b>100.0</b>   | <b>100.0</b>   | <b>100.0</b>   |

(P) Provisional

Source: Land-Use Statistics 2014-15, Directorate of Economics &amp; Statistics, DAC&amp;FW

**Chart 4 (c): Distribution of Gross Cropped Area**
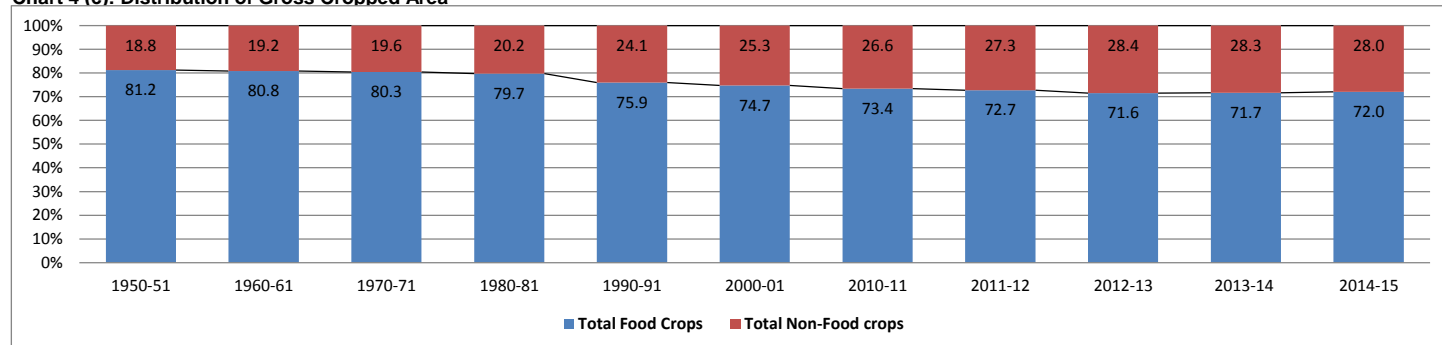

Source: Directorate of Economics &amp; Statistics, DAC&amp;FW

**Table 4.3: Changes in the Share of Area under Major Crops**

(Percentage)

| Year    | Rice  | Wheat | Nutri Cereals | Pulses | Food grains  | Oilseeds | Sugarcane | Cotton | Others | All Crops |
|---------|-------|-------|---------------|--------|--------------|----------|-----------|--------|--------|-----------|
| (1)     | (2)   | (3)   | (4)           | (5)    | (6)          | (7)      | (8)       | (9)    | (10)   | (11)      |
| 2007-08 | 23.31 | 14.88 | 15.12         | 12.54  | <b>65.85</b> | 14.17    | 2.68      | 5.00   | 12.30  | 100.00    |
| 2008-09 | 24.17 | 14.73 | 14.57         | 11.72  | <b>65.19</b> | 14.63    | 2.34      | 4.99   | 12.85  | 100.00    |
| 2009-10 | 22.59 | 15.33 | 14.91         | 12.54  | <b>65.38</b> | 13.99    | 2.25      | 5.46   | 12.93  | 100.00    |
| 2010-11 | 21.85 | 14.82 | 14.44         | 13.46  | <b>64.56</b> | 13.88    | 2.49      | 5.73   | 13.34  | 100.00    |
| 2011-12 | 22.48 | 15.25 | 13.50         | 12.49  | <b>63.72</b> | 13.44    | 2.57      | 6.22   | 14.05  | 100.00    |
| 2012-13 | 22.13 | 15.53 | 12.82         | 12.04  | <b>62.51</b> | 13.71    | 2.59      | 6.20   | 15.00  | 100.00    |
| 2013-14 | 22.07 | 15.24 | 12.61         | 12.61  | <b>62.54</b> | 14.03    | 2.50      | 5.98   | 14.95  | 100.00    |
| 2014-15 | 22.22 | 15.90 | 12.72         | 11.90  | <b>62.80</b> | 12.93    | 2.56      | 6.48   | 15.23  | 100.00    |
| 2015-16 | 22.90 | 15.45 | 12.39         | 12.65  | <b>62.60</b> | 13.25    | 2.50      | 6.24   | 15.40  | 100.00    |
| 2016-17 | 22.55 | 15.98 | 12.93         | 15.38  | <b>66.84</b> | 13.68    | 2.29      | 5.66   | 11.52  | 100.00    |

Note: (1) Area estimates are based on the data provided by State Statistical Authorities (SASAs) which is further cross checked and validated with estimates provided by other agencies, viz., MNCFC and CWWG.

(2). Others include Jute & Mesta and Horticulture Crops

(3) Data for Foodgrains, Oilseed and Commercial Crops are as per fourth Advance Estimates for 2016-17.

(4) Data for Horticulture crops are as per third Advance Estimates for 2016-17

Source: Directorate of Economics & Statistics, DAC&FW

**Chart 4 (d): Changes in the share of Area under Major Crops**

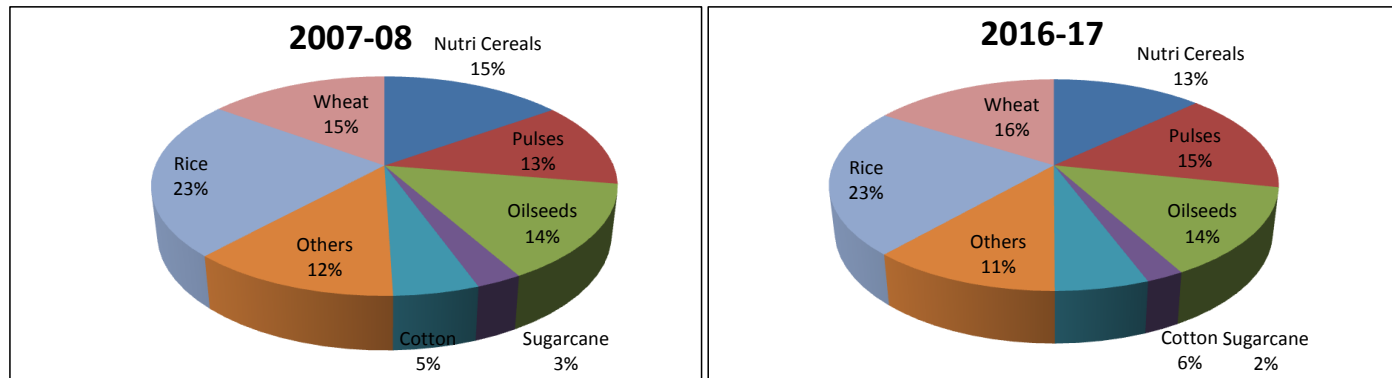

Source: Directorate of Economics & Statistics, DAC&FW

**Table 4.4 Number and Area of Operational Holdings by Size Group**

No. of Holdings: ('000 Number)  
Area Operated: ('000 Hectares)  
Average size: (Hectares)

| Category of Holdings                 | Number of Holdings              |                                 |                                 | Area                            |                                 |                                 | Average Size of Holdings |             |             |
|--------------------------------------|---------------------------------|---------------------------------|---------------------------------|---------------------------------|---------------------------------|---------------------------------|--------------------------|-------------|-------------|
|                                      | 2000-01*                        | 2005-06*                        | 2010-11                         | 2000-01*                        | 2005-06*                        | 2010-11                         | 2000-01*                 | 2005-06*    | 2010-11     |
| (1)                                  | (2)                             | (3)                             | (4)                             | (5)                             | (6)                             | (7)                             | (8)                      | (9)         | (10)        |
| Marginal<br>(Less than 1 hectare)    | 75408<br>(62.9)                 | 83694<br>(64.8)                 | 92826<br>(67.1)                 | 29814<br>(18.7)                 | 32026<br>(20.2)                 | 35908<br>(22.5)                 | 0.40                     | 0.38        | 0.39        |
| Small<br>(1.0 to 2.0 hectares)       | 22695<br>(18.9)                 | 23930<br>(18.5)                 | 24779<br>(17.9)                 | 32139<br>(20.2)                 | 33101<br>(20.9)                 | 35244<br>(22.1)                 | 1.42                     | 1.38        | 1.42        |
| Semi-Medium<br>(2.0 to 4.0 hectares) | 14021<br>(11.7)                 | 14127<br>(10.9)                 | 13896<br>(10.0)                 | 38193<br>(24.0)                 | 37898<br>(23.9)                 | 37705<br>(23.6)                 | 2.72                     | 2.68        | 2.71        |
| Medium<br>(4.0 to 10.0 hectares)     | 6577<br>(5.5)                   | 6375<br>(4.9)                   | 5875<br>(4.2)                   | 38217<br>(24.0)                 | 36583<br>(23.1)                 | 33828<br>(21.2)                 | 5.81                     | 5.74        | 5.76        |
| Large<br>(10.0 hectares and above)   | 1230<br>(1.0)                   | 1096<br>(0.8)                   | 973<br>(0.7)                    | 21072<br>(13.2)                 | 18715<br>(11.8)                 | 16907<br>(10.6)                 | 17.12                    | 17.08       | 17.38       |
| <b>All Holdings</b>                  | <b>119931</b><br><b>(100.0)</b> | <b>129222</b><br><b>(100.0)</b> | <b>138348</b><br><b>(100.0)</b> | <b>159436</b><br><b>(100.0)</b> | <b>158323</b><br><b>(100.0)</b> | <b>159592</b><br><b>(100.0)</b> | <b>1.33</b>              | <b>1.23</b> | <b>1.15</b> |

\*-Excluding Jharkhand

Source: Department of Agriculture, Cooperation & Farmers Welfare (Agriculture Census 2010-11, Phase-2).

Note: Figures in parentheses indicate percentage share in total.



**Table 4.5: South West Monsoon Rainfall (1 June-30 September)**

| Year | Number of Meteorological Sub-Divisions @ |                            | Percentage of Districts with | Actual Rainfall as % of Normal Rainfall (All India) |
|------|------------------------------------------|----------------------------|------------------------------|-----------------------------------------------------|
|      | Excess/ Normal Rainfall                  | Deficient/ Scanty Rainfall | Normal/ Excess Rainfall      |                                                     |
| (1)  | (2)                                      | (3)                        | (4)                          | (5)                                                 |
| 1990 | 32                                       | 3                          | 88                           | 119                                                 |
| 1991 | 27                                       | 8                          | 68                           | 91                                                  |
| 2001 | 30                                       | 5                          | 68                           | 92                                                  |
| 2010 | 31                                       | 5                          | 69                           | 102                                                 |
| 2011 | 33                                       | 3                          | 76                           | 101                                                 |
| 2012 | 23                                       | 13                         | 58                           | 92                                                  |
| 2013 | 30                                       | 6                          | 72                           | 106                                                 |
| 2014 | 24                                       | 12                         | 55                           | 88                                                  |
| 2015 | 19                                       | 17                         | 51                           | 86                                                  |
| 2016 | 27                                       | 9                          | 68                           | 97                                                  |
| 2017 | 30                                       | 6                          | 66                           | 95                                                  |

@ Total number of Meteorological sub-divisions was 35 upto 2001. From 2002 onwards, the no. of meteorological sub-divisions is 36.

Excess : + 20% or more of Long Period Average Rainfall

Normal : Between + 19% and -19% of Long Period Average Rainfall

Deficient : Between -20% and -59% of Long Period Average Rainfall

Scanty : Between -60% and -99% of Long Period Average Rainfall

Source: Directorate of Economics and Statistics, DAC&FW

# AREA, PRODUCTION AND YIELD OF PRINCIPAL CROPS

**Table 5.1: Foodgrains: Area, Production and Yield during 2015-16 and 2016-17 in major Producing States alongwith coverage under Irrigation**

| State            | 2016-17#      |               |               |               |             | 2015-16       |               |               |               |             | Area                |
|------------------|---------------|---------------|---------------|---------------|-------------|---------------|---------------|---------------|---------------|-------------|---------------------|
|                  | Area          | % to          | Production    | % to          | Yield       | Area          | % to          | Production    | % to          | Yield       | Under Irrigation(%) |
|                  | All - India   |               | All - India   |               |             | All - India   |               | All - India   |               |             | 2014-15*            |
| (1)              | (2)           | (3)           | (4)           | (5)           | (6)         | (7)           | (8)           | (9)           | (10)          | (11)        | (12)                |
| Uttar Pradesh    | 19.92         | 15.56         | 49.14         | 17.83         | 2467        | 19.36         | 15.71         | 42.55         | 16.91         | 2198        | 80.4                |
| Madhya Pradesh   | 17.03         | 13.30         | 32.98         | 11.96         | 1937        | 15.66         | 12.71         | 30.39         | 12.08         | 1941        | 59.7                |
| Punjab           | 6.42          | 5.02          | 27.99         | 10.15         | 4360        | 6.65          | 5.40          | 28.40         | 11.29         | 4269        | 99.0                |
| Rajasthan        | 14.11         | 11.02         | 19.28         | 7.00          | 1367        | 12.98         | 10.53         | 18.04         | 7.17          | 1390        | 35.9                |
| Haryana          | 4.59          | 3.59          | 17.16         | 6.22          | 3735        | 4.48          | 3.64          | 16.36         | 6.50          | 3648        | 92.7                |
| West Bengal      | 5.98          | 4.67          | 17.06         | 6.19          | 2853        | 6.38          | 5.18          | 18.01         | 7.16          | 2823        | 48.4                |
| Maharashtra      | 12.16         | 9.50          | 15.79         | 5.73          | 1298        | 11.21         | 9.10          | 8.75          | 3.48          | 781         | 18.0                |
| Bihar            | 6.61          | 5.17          | 15.58         | 5.65          | 2355        | 6.57          | 5.33          | 14.51         | 5.77          | 2208        | 69.8                |
| Andhra Pradesh   | 3.97          | 3.10          | 10.37         | 3.76          | 2610        | 4.14          | 3.36          | 10.63         | 4.23          | 2571        | 66.5                |
| Karnataka        | 7.29          | 5.69          | 9.64          | 3.50          | 1323        | 7.33          | 5.95          | 9.92          | 3.94          | 1354        | 27.3                |
| Chhattisgarh     | 5.05          | 3.95          | 9.23          | 3.35          | 1827        | 4.99          | 4.05          | 6.65          | 2.65          | 1334        | 31.6                |
| Odisha           | 4.80          | 3.75          | 9.06          | 3.29          | 1887        | 4.82          | 3.91          | 6.41          | 2.55          | 1330        | 29.0                |
| Telangana        | 3.29          | 2.57          | 8.37          | 3.03          | 2545        | 2.18          | 1.77          | 5.13          | 2.04          | 2353        | 64.3                |
| Gujarat          | 3.80          | 2.97          | 7.42          | 2.69          | 1953        | 3.14          | 2.55          | 6.28          | 2.50          | 2000        | 45.4                |
| Tamil Nadu       | 2.99          | 2.33          | 6.22          | 2.26          | 2084        | 3.75          | 3.04          | 11.48         | 4.56          | 3063        | 56.8                |
| Assam            | 2.67          | 2.08          | 5.47          | 1.98          | 2049        | 2.68          | 2.18          | 5.36          | 2.13          | 1997        | 10.4                |
| Jharkhand        | 2.89          | 2.25          | 5.37          | 1.95          | 1860        | 2.65          | 2.15          | 4.09          | 1.63          | 1546        | 8.8                 |
| Uttarakhand      | 0.88          | 0.69          | 1.87          | 0.68          | 2131        | 0.88          | 0.71          | 1.75          | 0.69          | 1989        | 44.8                |
| Others           | 3.59          | 2.81          | 7.69          | 2.79          | @           | 3.38          | 2.74          | 6.86          | 2.73          | @           | -                   |
| <b>All India</b> | <b>128.03</b> | <b>100.00</b> | <b>275.68</b> | <b>100.00</b> | <b>2153</b> | <b>123.22</b> | <b>100.00</b> | <b>251.57</b> | <b>100.00</b> | <b>2042</b> | <b>53.1</b>         |

@ - Since area/ production is low in individual states, yield rate is not worked out.

Note: States have been arranged in descending order of percentage share of production during 2016-17.

\* Provisional

# Fourth Advance Estimates.

Source: Directorate of Economics & Statistics, DAC&FW

**Table 5.2 (a): Area under Major Crops from 1950-51 onwards (in million hectares)**

| Crops         | 1950-51 | 1960-61 | 1970-71 | 1980-81 | 1990-91 | 2000-01 | 2010-11 | 2011-12 | 2012-13 | 2013-14 | 2014-15 | 2015-16 | 2016-17* |
|---------------|---------|---------|---------|---------|---------|---------|---------|---------|---------|---------|---------|---------|----------|
| (1)           | (2)     | (3)     | (4)     | (5)     | (6)     | (7)     | (8)     | (9)     | (10)    | (11)    | (12)    | (13)    | (14)     |
| Rice          | 30.81   | 34.13   | 37.59   | 40.15   | 42.69   | 44.71   | 42.86   | 44.01   | 42.75   | 44.14   | 44.11   | 43.50   | 43.19    |
| Wheat         | 9.75    | 12.93   | 18.24   | 22.28   | 24.17   | 25.73   | 29.07   | 29.86   | 30.00   | 30.47   | 31.47   | 30.42   | 30.60    |
| Nutri Cereals | 37.67   | 44.96   | 45.95   | 41.78   | 36.32   | 30.26   | 28.34   | 26.42   | 24.76   | 25.22   | 25.17   | 24.39   | 24.77    |
| Pulses        | 19.09   | 23.56   | 22.54   | 22.46   | 24.66   | 20.35   | 26.40   | 24.46   | 23.26   | 25.21   | 23.55   | 24.91   | 29.46    |
| Foodgrains    | 97.32   | 115.58  | 124.32  | 126.67  | 127.84  | 121.05  | 126.67  | 124.75  | 120.78  | 125.04  | 124.30  | 123.22  | 128.03   |
| Oilseeds      | 10.73   | 13.77   | 16.64   | 17.60   | 24.15   | 22.77   | 27.22   | 26.31   | 26.48   | 28.05   | 25.59   | 26.08   | 26.20    |
| Sugarcane     | 1.71    | 2.42    | 2.62    | 2.67    | 3.69    | 4.32    | 4.88    | 5.04    | 5.00    | 4.99    | 5.06    | 4.92    | 4.38     |
| Cotton        | 5.88    | 7.61    | 7.61    | 7.82    | 7.44    | 8.53    | 11.24   | 12.18   | 11.98   | 11.96   | 12.81   | 12.29   | 10.84    |
| Jute & Mesta  | 0.57    | 0.90    | 1.08    | 1.30    | 1.02    | 1.02    | 0.87    | 0.90    | 0.86    | 0.83    | 0.81    | 0.78    | 0.76     |

\* 4th Advance Estimates

Source: Department of Agriculture, Cooperation &amp; Farmers Welfare

**Table 5.2 (b): Production of Major Agricultural Crops**

|       |                           | (Million Tonnes) |              |               |               |               |               |               |               |               |               |               |               |               |
|-------|---------------------------|------------------|--------------|---------------|---------------|---------------|---------------|---------------|---------------|---------------|---------------|---------------|---------------|---------------|
| S.No. | Crops                     | 1950-51          | 1960-61      | 1970-71       | 1980-81       | 1990-91       | 2000-01       | 2010-11       | 2011-12       | 2012-13       | 2013-14       | 2014-15       | 2015-16       | 2016-17*      |
| (1)   | (2)                       | (3)              | (4)          | (5)           | (6)           | (7)           | (8)           | (9)           | (10)          | (11)          | (12)          | (13)          | (14)          | (15)          |
| 1     | <b>Foodgrains</b>         | <b>50.82</b>     | <b>82.02</b> | <b>108.42</b> | <b>129.59</b> | <b>176.39</b> | <b>196.81</b> | <b>244.49</b> | <b>259.29</b> | <b>257.13</b> | <b>265.04</b> | <b>252.02</b> | <b>251.57</b> | <b>275.68</b> |
|       | Rice                      | 20.58            | 34.58        | 42.22         | 53.63         | 74.29         | 84.98         | 95.98         | 105.30        | 105.23        | 106.65        | 105.48        | 104.41        | 110.15        |
|       | Wheat                     | 6.46             | 11.00        | 23.83         | 36.31         | 55.14         | 69.68         | 86.87         | 94.88         | 93.51         | 95.85         | 86.53         | 92.29         | 98.38         |
|       | Maize                     | 1.73             | 4.08         | 7.49          | 6.96          | 8.96          | 12.04         | 21.73         | 21.76         | 22.26         | 24.26         | 24.17         | 22.57         | 26.26         |
|       | Nutri Cereals             | 15.38            | 23.74        | 30.55         | 29.02         | 32.70         | 31.08         | 43.40         | 42.01         | 40.04         | 43.29         | 42.86         | 38.52         | 44.19         |
| 2     | <b>Pulses</b>             | <b>8.41</b>      | <b>12.70</b> | <b>11.82</b>  | <b>10.63</b>  | <b>14.26</b>  | <b>11.08</b>  | <b>18.24</b>  | <b>17.09</b>  | <b>18.34</b>  | <b>19.25</b>  | <b>17.15</b>  | <b>16.35</b>  | <b>22.95</b>  |
|       | Gram                      | 3.65             | 6.25         | 5.20          | 4.33          | 5.36          | 3.86          | 8.22          | 7.70          | 8.83          | 9.53          | 7.33          | 7.06          | 9.33          |
|       | Tur (Arhar)               | 1.72             | 2.07         | 1.88          | 1.96          | 2.41          | 2.25          | 2.86          | 2.65          | 3.02          | 3.17          | 2.81          | 2.56          | 4.78          |
|       | Lentil (Masur)            | --               | --           | 0.37          | 0.47          | 0.85          | 0.92          | 0.94          | 1.06          | 1.13          | 1.02          | 1.04          | 0.98          | -             |
| 3     | <b>Oilseeds</b>           | <b>5.16</b>      | <b>6.98</b>  | <b>9.63</b>   | <b>9.37</b>   | <b>18.61</b>  | <b>18.44</b>  | <b>32.48</b>  | <b>29.80</b>  | <b>30.94</b>  | <b>32.75</b>  | <b>27.51</b>  | <b>25.25</b>  | <b>32.10</b>  |
|       | Groundnut                 | 3.48             | 4.81         | 6.11          | 5.01          | 7.51          | 6.41          | 8.26          | 6.96          | 4.70          | 9.71          | 7.40          | 6.73          | 7.565         |
|       | Rapeseed & Mustard        | 0.76             | 1.35         | 1.98          | 2.30          | 5.23          | 4.19          | 8.18          | 6.60          | 8.03          | 7.88          | 6.28          | 6.80          | 7.98          |
|       | Soy Bean                  | --               | --           | 0.01          | 0.44          | 2.60          | 5.28          | 12.74         | 12.21         | 14.67         | 11.86         | 10.37         | 8.57          | 13.79         |
|       | Sunflower                 | --               | --           | 0.08          | 0.07          | 0.87          | 0.65          | 0.65          | 0.52          | 0.54          | 0.50          | 0.43          | 0.30          | 0.24          |
| 4     | <b>Cotton #</b>           | 3.04             | 5.60         | 4.76          | 7.01          | 9.84          | 9.52          | 33.00         | 35.20         | 34.22         | 35.90         | 34.80         | 30.01         | 33.09         |
| 5     | <b>Jute &amp; Mesta @</b> | 3.31             | 5.26         | 6.19          | 8.16          | 9.23          | 10.56         | 10.62         | 11.40         | 10.93         | 11.68         | 11.13         | 10.52         | 10.60         |
| 6     | <b>Sugarcane</b>          | 57.05            | 110.00       | 126.37        | 154.25        | 241.05        | 295.96        | 342.38        | 361.04        | 341.20        | 352.14        | 362.33        | 348.45        | 306.72        |
| 7     | <b>Tobacco</b>            | 0.26             | 0.31         | 0.36          | 0.48          | 0.56          | 0.34          | 0.80          | 0.75          | 0.66          | 0.74          | 0.84          | 0.80          | -             |

\* 4th Advance Estimates # Million bales of 170 kg. each @ Million bales of 180 kg. each

Source: Directorate of Economics and Statistics, DAC&FW

**Table 5.3: Target and Achievement of Production of Major Crops**

(Million Tonnes)

| Crop          | 2013-14 |             | 2014-15 |             | 2015-16 |             | 2016-17* |             |
|---------------|---------|-------------|---------|-------------|---------|-------------|----------|-------------|
|               | Target  | Achievement | Target  | Achievement | Target  | Achievement | Target   | Achievement |
| (1)           | (2)     | (3)         | (4)     | (5)         | (6)     | (7)         | (8)      | (9)         |
| Rice          | 105.00  | 106.65      | 106.00  | 105.48      | 106.10  | 104.41      | 108.50   | 110.15      |
| Wheat         | 92.50   | 95.85       | 94.00   | 86.53       | 94.75   | 92.29       | 96.50    | 98.38       |
| Nutri Cereals | 42.50   | 43.29       | 41.50   | 42.86       | 43.20   | 38.52       | 44.35    | 44.19       |
| Pulses        | 19.00   | 19.25       | 19.50   | 17.15       | 20.05   | 16.35       | 20.75    | 22.95       |
| Foodgrains    | 259.00  | 265.04      | 261.00  | 252.02      | 264.10  | 251.57      | 270.10   | 275.68      |
| Oilseeds      | 31.00   | 32.75       | 33.00   | 27.51       | 33.00   | 25.25       | 35.00    | 32.10       |
| Sugarcane     | 340.00  | 352.14      | 345.00  | 362.33      | 355.00  | 348.45      | 355.00   | 306.72      |
| Cotton #      | 35.00   | 35.90       | 35.00   | 34.80       | 35.15   | 30.01       | 36.00    | 33.09       |
| Jute & Mesta@ | 12.00   | 11.69       | 11.20   | 11.13       | 11.70   | 10.52       | 11.70    | 10.60       |

\* 4th Advance Estimates. @ Million Bales of 180 kg. each.

# Million Bales of 170 kg. each.

Source: Directorate of Economics and Statistics, DAC&FW

**Table 5.4: Three Largest Producing States of Important Crops during 2016-17\***

| Production: Million Tonnes |                     |                    |               |                                 |
|----------------------------|---------------------|--------------------|---------------|---------------------------------|
| Group of Crops             | Crops               | States             | Production    | % Share in All India Production |
| (1)                        | (2)                 | (3)                | (4)           | (5)                             |
| <b>I. Foodgrains</b>       | Rice                | West Bengal        | 15.09         | 13.70                           |
|                            |                     | Uttar Pradesh      | 12.95         | 11.76                           |
|                            |                     | Punjab             | 11.03         | 10.01                           |
|                            |                     | <b>All - India</b> | <b>110.15</b> | <b>100.00</b>                   |
|                            | Wheat               | Uttar Pradesh      | 30.06         | 30.55                           |
|                            |                     | Madhya Pradesh     | 17.94         | 18.24                           |
|                            |                     | Punjab             | 16.44         | 16.71                           |
|                            |                     | <b>All - India</b> | <b>98.38</b>  | <b>100.00</b>                   |
|                            | Maize               | Maharashtra        | 3.80          | 14.47                           |
|                            |                     | Karnataka          | 3.26          | 12.41                           |
|                            |                     | Madhya Pradesh     | 3.17          | 12.07                           |
|                            |                     | <b>All - India</b> | <b>26.26</b>  | <b>100.00</b>                   |
|                            | Total Nutri Cereals | Maharashtra        | 6.96          | 15.75                           |
|                            |                     | Rajasthan          | 6.78          | 15.34                           |
|                            |                     | Karnataka          | 5.22          | 11.81                           |
|                            |                     | <b>All - India</b> | <b>44.19</b>  | <b>100.00</b>                   |
|                            | Total Pulses        | Madhya Pradesh     | 6.25          | 27.23                           |
|                            |                     | Maharashtra        | 3.81          | 16.60                           |
|                            |                     | Rajasthan          | 3.06          | 13.33                           |
|                            |                     | <b>All - India</b> | <b>22.95</b>  | <b>100.00</b>                   |
| Total Foodgrains           | Uttar Pradesh       | 49.14              | 17.83         |                                 |
|                            | Madhya Pradesh      | 32.98              | 11.96         |                                 |
|                            | Punjab              | 27.99              | 10.15         |                                 |
|                            | <b>All - India</b>  | <b>275.68</b>      | <b>100.00</b> |                                 |
| <b>II .Oilseeds</b>        | Groundnut           | Gujarat            | 3.16          | 41.80                           |
|                            |                     | Rajasthan          | 1.14          | 15.08                           |
|                            |                     | Andhra Pradesh     | 0.71          | 9.39                            |
|                            |                     | <b>All - India</b> | <b>7.56</b>   | <b>100.00</b>                   |
|                            | Rapeseed & Mustard  | Rajasthan          | 3.71          | 46.49                           |
|                            |                     | Madhya Pradesh     | 0.92          | 11.53                           |
|                            |                     | Haryana            | 0.90          | 11.28                           |
|                            |                     | <b>All - India</b> | <b>7.98</b>   | <b>100.00</b>                   |
|                            | Soy Bean            | Madhya Pradesh     | 7.08          | 51.34                           |
|                            |                     | Maharashtra        | 4.77          | 34.59                           |
|                            |                     | Rajasthan          | 1.13          | 8.19                            |
|                            |                     | <b>All - India</b> | <b>13.79</b>  | <b>100.00</b>                   |
|                            | Sunflower           | Karnataka          | 0.10          | 41.67                           |
|                            |                     | Andhra Pradesh     | 0.02          | 8.75                            |
|                            |                     | Bihar              | 0.02          | 8.33                            |
|                            |                     | <b>All - India</b> | <b>0.24</b>   | <b>100.00</b>                   |
| Total Oilseeds             | Madhya Pradesh      | 8.68               | 27.04         |                                 |
|                            | Rajasthan           | 6.31               | 19.66         |                                 |
|                            | Maharashtra         | 5.26               | 16.39         |                                 |

contd.

**Table 5.4: Three Largest Producing States of Important Crops during 2016-17\***

|                              |                | Production: Million Tonnes |                    |                                 |               |
|------------------------------|----------------|----------------------------|--------------------|---------------------------------|---------------|
| Group of Crops               | Crops          | States                     | Production         | % Share in All India Production |               |
|                              |                | <b>All - India</b>         | <b>32.10</b>       | <b>100.00</b>                   |               |
| <b>III. Other Cash Crops</b> | Sugarcane      | Uttar Pradesh              | 144.78             | 1363.28                         |               |
|                              |                | Maharashtra                | 50.64              | 476.84                          |               |
|                              |                | Karnataka                  | 23.54              | 221.66                          |               |
|                              |                |                            | <b>All - India</b> | <b>306.72</b>                   | <b>100.00</b> |
|                              | Cotton @       | Maharashtra                | 10.62              | 104.58                          |               |
|                              |                | Gujarat                    | 8.22               | 37.28                           |               |
|                              |                | Telangana                  | 2.93               | 420.99                          |               |
|                              |                |                            | <b>All - India</b> | <b>33.09</b>                    | <b>100.00</b> |
|                              | Jute & Mesta\$ | West Bengal                | 7.86               | 75.11                           |               |
|                              |                | Bihar                      | 1.68               | 16.06                           |               |
| Assam                        |                | 0.83                       | 7.93               |                                 |               |
|                              |                | <b>All - India</b>         | <b>10.60</b>       | <b>100.00</b>                   |               |

Note:\*Production Estimates are as per 4th Advance Estimates

@ : Production in million bales of 170 kg. each.

\$ : Production in million bales of 180 kg. each.

Source: Directorate of Economics and Statistics, DAC&FW



**Table 5.5: Production of Oilseeds & Oils and Net Availability of Edible Oils**

(in lakh tonnes)

| Oilseeds / Oils                                         | 2014-15       |               | 2015-16*      |               | 2016-17**     |               |
|---------------------------------------------------------|---------------|---------------|---------------|---------------|---------------|---------------|
|                                                         | Oilseeds      | Oils          | Oilseeds      | Oils          | Oilseeds      | Oils          |
| (1)                                                     | (2)           | (3)           | (4)           | (5)           | (6)           | (7)           |
| <b>A. Primary Source</b>                                |               |               |               |               |               |               |
| Groundnut                                               | 74.02         | 17.02         | 67.71         | 15.36         | 75.65         | 17.16         |
| Rapeseed & Mustard                                      | 62.82         | 19.47         | 68.21         | 21.16         | 79.77         | 24.74         |
| Soy Bean                                                | 103.74        | 16.60         | 85.92         | 13.76         | 137.94        | 22.1          |
| Sunflower                                               | 4.34          | 1.43          | 3.31          | 1.10          | 2.41          | 0.8           |
| Sesamum                                                 | 8.68          | 2.57          | 8.66          | 2.70          | 7.84          | 2.45          |
| Nigerseed                                               | 0.76          | 0.23          | 0.77          | 0.22          | 0.83          | 0.24          |
| Safflower                                               | 0.90          | 0.27          | 0.64          | 0.18          | 0.78          | 0.22          |
| Castor                                                  | 18.70         | 7.48          | 16.50         | 5.80          | 14.21         | 4.99          |
| Linseed                                                 | 1.55          | 0.47          | 1.32          | 0.34          | 1.54          | 0.39          |
| <b>Sub Total</b>                                        | <b>275.51</b> | <b>65.54</b>  | <b>253.04</b> | <b>60.62</b>  | <b>320.97</b> | <b>73.09</b>  |
| <b>B. Secondary Source</b>                              |               |               |               |               |               |               |
| Coconut                                                 | -             | 4.80          | -             | 4.32          | -             | 5.2           |
| Palm Oil                                                | -             | -             | -             | -             | -             | 2.3           |
| Cottonseed                                              | -             | 12.15         | -             | 10.05         | -             | 12.24         |
| Ricebran                                                | -             | 9.20          | -             | 9.90          | -             | 10.31         |
| Solvent Extracted Oils                                  | -             | 3.00          | -             | 3.50          | -             | 2.85          |
| Tree & Forest Origin                                    | -             | 1.60          | -             | 1.50          | -             | 1.5           |
| <b>Sub Total</b>                                        | -             | <b>30.75</b>  | -             | <b>29.27</b>  | -             | <b>34.4</b>   |
| <b>Total(A+B)</b>                                       | -             | <b>96.29</b>  | -             | <b>89.89</b>  | -             | <b>107.49</b> |
| <b>C. Less: Exports &amp; Industrial Use</b>            |               |               |               |               |               |               |
|                                                         | -             | <b>5.94</b>   | -             | <b>5.50</b>   | -             | <b>6.5</b>    |
| <b>D. Net Domestic Availability of Edible Oils</b>      |               |               |               |               |               |               |
|                                                         | -             | <b>92.06</b>  | -             | <b>86.37</b>  | -             | <b>100.99</b> |
| <b>E.Import of Edible Oils \$</b>                       | -             | <b>138.53</b> | -             | <b>148.20</b> | -             | <b>153.11</b> |
| <b>F. Total Availability/Consumption of Edible Oils</b> |               |               |               |               |               |               |
|                                                         | -             | <b>230.59</b> | -             | <b>234.57</b> | -             | <b>254.1</b>  |

\* Based on Final Estimate released by Ministry of Agriculture and Farmers Welfare on 16.08.2017

\*\* Based on 4th Advance Estimates released by Ministry of Agriculture and Farmers Welfare on 16.08.2017

\$ Directorate General of Commercial Intelligence & Statistics (Department of Commerce)

Source: Directorate of Vanaspati, Vegetable Oils and Fats

**Table 5.6: All India Crop-wise Yield**

| Crops                   | (Quintal/ hectare) |              |              |              |              |              |              |              |              |              |
|-------------------------|--------------------|--------------|--------------|--------------|--------------|--------------|--------------|--------------|--------------|--------------|
|                         | 1950-51            | 1990-91      | 2000-01      | 2010-11      | 2011-12      | 2012-13      | 2013-14      | 2014-15      | 2015-16      | 2016-17*     |
| (1)                     | (2)                | (3)          | (4)          | (5)          | (6)          | (7)          | (8)          | (9)          | (10)         | (11)         |
| Rice                    | 6.68               | 17.40        | 19.01        | 22.39        | 23.93        | 24.61        | 24.16        | 23.91        | 24.00        | 25.50        |
| Jowar                   | 3.53               | 8.14         | 7.64         | 9.49         | 9.57         | 8.50         | 9.57         | 8.85         | 6.97         | 8.89         |
| Bajra                   | 2.88               | 6.58         | 6.88         | 10.79        | 11.71        | 11.98        | 11.84        | 12.54        | 11.32        | 13.11        |
| Maize                   | 5.47               | 15.18        | 18.22        | 25.40        | 24.78        | 25.66        | 26.76        | 26.30        | 25.63        | 26.64        |
| Wheat                   | 6.63               | 22.81        | 27.08        | 29.88        | 31.77        | 31.17        | 31.45        | 27.50        | 30.34        | 32.16        |
| Nutri Cereals           | 4.08               | 9.00         | 10.27        | 15.31        | 15.90        | 16.17        | 17.17        | 17.03        | 15.79        | 17.84        |
| Gram                    | 4.82               | 7.12         | 7.44         | 8.95         | 9.28         | 10.36        | 9.60         | 8.88         | 8.40         | 9.73         |
| Tur or Arhar            | 7.88               | 6.73         | 6.18         | 6.55         | 6.62         | 7.76         | 8.13         | 7.30         | 6.46         | 8.85         |
| Total Pulses            | 4.41               | 5.78         | 5.44         | 6.91         | 6.99         | 7.89         | 7.64         | 7.28         | 6.56         | 7.79         |
| <b>Total Foodgrains</b> | <b>5.22</b>        | <b>13.80</b> | <b>16.26</b> | <b>19.30</b> | <b>20.78</b> | <b>21.29</b> | <b>21.20</b> | <b>20.28</b> | <b>20.42</b> | <b>21.53</b> |
| Sugarcane               | 334.22             | 653.95       | 685.78       | 700.91       | 703.17       | 682.54       | 705.22       | 715.12       | 707.22       | 698.86       |
| Groundnut               | 7.75               | 9.04         | 9.77         | 14.11        | 13.05        | 9.95         | 17.64        | 15.52        | 14.65        | 14.24        |
| Mustard                 | 3.68               | 9.04         | 9.36         | 11.85        | 11.45        | 12.62        | 11.85        | 10.83        | 11.83        | 13.24        |
| Soy Bean                | 4.26               | 10.15        | 8.23         | 13.27        | 12.07        | 13.53        | 10.12        | 9.51         | 7.38         | 12.19        |
| Sunflower               | 6.53               | 5.35         | 6.05         | 7.01         | 6.92         | 6.55         | 7.50         | 7.36         | 6.08         | 6.99         |
| <b>Total Oilseeds</b>   | <b>4.81</b>        | <b>7.71</b>  | <b>8.10</b>  | <b>11.93</b> | <b>11.35</b> | <b>11.68</b> | <b>11.68</b> | <b>10.75</b> | <b>9.68</b>  | <b>12.25</b> |
| Cotton                  | 0.88               | 2.25         | 1.90         | 4.99         | 4.91         | 4.86         | 5.10         | 4.62         | 4.15         | 5.19         |
| Tobacco                 | 7.31               | 13.53        | 13.18        | 16.87        | 16.13        | 15.42        | 16.12        | 18.42        | 17.81        | NA           |

NA: Not Available \* 4th advanced estimates

Source: Directorate of Economics and Statistics, DAC&amp;FW

**Table 5.7: All India Crop-wise Irrigated Area**

| Crops                             | (Percentage) |             |             |             |             |             |             |             |
|-----------------------------------|--------------|-------------|-------------|-------------|-------------|-------------|-------------|-------------|
|                                   | 1950-51      | 1990-91     | 2000-01     | 2010-11     | 2011-12 (P) | 2012-13     | 2013-14     | 2014-15 (P) |
| (1)                               | (2)          | (3)         | (4)         | (5)         | (6)         | (7)         | (8)         | (9)         |
| Rice                              | 31.7         | 45.5        | 53.6        | 58.8        | 58.6        | 58.5        | 59.7        | 60.1        |
| Jowar                             | 3.0          | 5.6         | 7.9         | 8.7         | 9.7         | 9.7         | 9.6         | 9.9         |
| Bajra                             | 3.4          | 5.1         | 8.0         | 8.0         | 8.1         | 9.1         | 9.0         | 9.5         |
| Maize                             | 11.4         | 19.7        | 22.4        | 24.5        | 25.7        | 25.9        | 27.2        | 26.6        |
| Wheat                             | 34.0         | 81.1        | 88.1        | 92.2        | 93.0        | 93.5        | 93.6        | 94.2        |
| Barley                            | NA           | NA          | 65.5        | 69.9        | 74.8        | 76.4        | 76.6        | 80.3        |
| <b>Total Cereals</b>              | <b>NA</b>    | <b>NA</b>   | <b>49.8</b> | <b>56.3</b> | <b>57.7</b> | <b>58.6</b> | <b>59.5</b> | 60.1        |
| Gram                              | 12.5         | 20.5        | 30.9        | 29.7        | 33.5        | 36.5        | 35.2        | 38.6        |
| Tur or Arhar                      | 0.5          | 5.5         | 4.2         | 4.0         | 3.8         | 3.9         | 4.3         | 4.0         |
| Total Pulses                      | 9.4          | 10.5        | 12.5        | 14.9        | 16.1        | 18.5        | 19.7        | 19.9        |
| <b>Total Foodgrains</b>           | <b>18.1</b>  | <b>35.1</b> | <b>43.4</b> | <b>48.1</b> | <b>49.8</b> | <b>51.3</b> | <b>51.9</b> | 53.1        |
| Sugarcane                         | 67.3         | 86.9        | 92.1        | 92.7        | 94.8        | 95.2        | 95.3        | 90.2        |
| Groundnut                         | NA           | 18.6        | 17.6        | 21.8        | 24.3        | 25.3        | 25.8        | 26.7        |
| Rapeseed & Mustard                | NA           | 59.8        | 66.1        | 69.8        | 73.5        | 76.5        | 76.6        | 76.6        |
| Soy Bean                          | NA           | NA          | 1.4         | 0.6         | 0.6         | 0.6         | 0.6         | 0.7         |
| Sunflower                         | NA           | NA          | 27.6        | 31.2        | 32.3        | 29.0        | 28.6        | 30.1        |
| <b>Total Oilseeds</b>             | <b>NA</b>    | <b>22.9</b> | <b>23.0</b> | <b>24.9</b> | <b>27.5</b> | <b>28.2</b> | <b>27.3</b> | 27.4        |
| Cotton                            | 8.2          | 32.9        | 34.3        | 33.8        | 35.9        | 33.8        | 32.5        | 33.7        |
| Tobacco                           | NA           | 43.2        | 52.8        | 46.4        | 51.0        | 53.8        | 51.6        | 58.8        |
| <b>Total area under all crops</b> | ...          | ...         | <b>40.2</b> | <b>45.0</b> | <b>46.9</b> | <b>47.5</b> | <b>47.7</b> | <b>48.6</b> |

NA: Not Available , (P): Provisional

Source: Directorate of Economics and Statistics, DAC&FW

**Table 5.8: State-wise Coverage of Irrigated Area under Major Crops during 2014-15**

| State             | (Percentage) |             |               |              |                  |             |                     |                |             |                                      |
|-------------------|--------------|-------------|---------------|--------------|------------------|-------------|---------------------|----------------|-------------|--------------------------------------|
|                   | Rice         | Wheat       | Total Cereals | Total Pulses | Total Foodgrains | Sugarcane   | Fruits & Vegetables | Total Oilseeds | Cotton      | Total Irrigated area under all crops |
| (1)               | (2)          | (3)         | (4)           | (5)          | (6)              | (7)         | (8)                 | (9)            | (10)        | (11)                                 |
| Andhra Pradesh    | 97.1         | 15.0        | 89.5          | 2.0          | 66.5             | 92.4        | 49.5                | 18.7           | 19.9        | 50.5                                 |
| Arunachal Pradesh | 20.6         | 52.9        | 20.9          | -            | 20.9             | 0.0         | 112.6               | 0.0            | -           | 18.7                                 |
| Assam             | 11.0         | 10.9        | 10.9          | 1.7          | 10.4             | 1.5         | 0.0                 | 2.5            | 0.0         | 9.2                                  |
| Bihar             | 65.0         | 94.9        | 75.2          | 4.5          | 69.8             | 79.3        | 68.2                | 57.2           | -           | 68.7                                 |
| Chhattisgarh      | 35.7         | 75.7        | 34.9          | 15.0         | 31.6             | 98.9        | 55.6                | 4.5            | 57.6        | 31.2                                 |
| Goa               | 33.7         | -           | 33.7          | 97.6         | 44.5             | 100.0       | 10.1                | 16.5           | -           | 24.6                                 |
| Gujarat*          | 61.5         | 90.8        | 52.5          | 13.1         | 45.4             | 94.5        | 91.9                | 29.8           | 58.7        | 47.1                                 |
| Haryana           | 99.9         | 99.5        | 94.0          | 20.7         | 92.7             | 100.0       | 96.8                | 83.1           | 99.8        | 89.1                                 |
| Himachal Pradesh* | 66.1         | 21.8        | 21.4          | 12.3         | 21.0             | 54.1        | 17.3                | 16.4           | 100.0       | 21.0                                 |
| Jammu & Kashmir*  | 90.5         | 28.5        | 40.9          | 13.5         | 40.2             | 40.9        | 40.5                | 69.7           | -           | 42.8                                 |
| Jharkhand         | 5.0          | 90.9        | 9.4           | 3.9          | 8.8              | 68.3        | 71.4                | 23.2           | 150.0       | 14.3                                 |
| Karnataka         | 76.0         | 60.9        | 36.2          | 8.6          | 27.3             | 99.4        | 49.5                | 29.9           | 27.2        | 34.2                                 |
| Kerala            | 76.1         | 0.0         | 75.9          | 0.0          | 74.6             | 99.9        | 14.2                | 20.8           | 0.0         | 17.9                                 |
| Madhya Pradesh    | 34.2         | 93.4        | 67.2          | 42.8         | 59.7             | 99.9        | 88.4                | 5.3            | 60.4        | 43.3                                 |
| Maharashtra*      | 26.1         | 73.9        | 21.0          | 10.9         | 18.0             | 70.5        | 81.6                | 3.2            | 2.7         | 18.2                                 |
| Manipur*          | 30.7         | 0.0         | 27.3          | 0.0          | 24.4             | 0.0         | 0.0                 | 0.0            | -           | 18.0                                 |
| Meghalaya         | 90.7         | 100.0       | 76.3          | 0.0          | 71.9             | 0.0         | 15.9                | 45.5           | 0.0         | 37.1                                 |
| Mizoram           | 72.5         | -           | 58.2          | 94.3         | 63.0             | 0.0         | 0.0                 | 0.0            | 0.0         | 14.5                                 |
| Nagaland          | 51.7         | 17.2        | 36.5          | 2.6          | 32.5             | 0.0         | 0.0                 | 4.6            | 0.0         | 21.2                                 |
| Odisha            | 33.3         | 100.0       | 32.0          | 2.2          | 29.0             | 100.0       | 100.0               | 12.7           | -           | 28.7                                 |
| Punjab            | 99.7         | 99.1        | 99.0          | 87.7         | 99.0             | 97.7        | 99.7                | 86.8           | 100.0       | 98.7                                 |
| Rajasthan         | 68.6         | 99.6        | 41.3          | 20.7         | 35.9             | 98.4        | 97.0                | 63.8           | 95.2        | 42.0                                 |
| Sikkim*           | 98.8         | 0.4         | 18.8          | 0.2          | 17.0             | -           | 3.4                 | 0.2            | -           | 8.9                                  |
| Tamil Nadu        | 94.4         | 100.0       | 71.8          | 10.9         | 56.8             | 100.0       | 54.5                | 66.5           | 26.5        | 56.6                                 |
| Telangana         | 98.1         | 99.2        | 75.3          | 5.1          | 64.3             | 100.0       | 80.2                | 40.5           | 12.5        | 47.6                                 |
| Tripura*          | 33.9         | 100.0       | 33.5          | 28.3         | 33.3             | 50.3        | 23.7                | 18.8           | 0.0         | 24.0                                 |
| Uttarakhand       | 70.0         | 59.5        | 47.3          | 7.9          | 44.8             | 98.7        | 39.7                | 25.0           | -           | 49.5                                 |
| Uttar Pradesh     | 86.7         | 98.8        | 87.0          | 27.4         | 80.4             | 95.4        | 88.6                | 42.5           | 97.2        | 80.2                                 |
| West Bengal*      | 46.9         | 98.7        | 49.7          | 15.0         | 48.4             | 84.6        | 89.5                | 79.1           | 80.0        | 58.8                                 |
| <b>All India</b>  | <b>60.1</b>  | <b>94.2</b> | <b>60.1</b>   | <b>19.9</b>  | <b>53.1</b>      | <b>90.2</b> | <b>65.6</b>         | <b>27.4</b>    | <b>33.7</b> | <b>48.6</b>                          |

\* The figures related to irrigated area (Part-II) are either estimated based on the data for the latest available year received from the State/UT or are estimated/taken from Agriculture Census.

Source: Directorate of Economics and Statistics, DAC&FW

# HORTICULTURE STATISTICS

**Table: 6.1 Area and Production of Horticulture Crops - All India**

| Crops                         | Area in '000 Ha<br>Production in '000 MT |              |                         |              |
|-------------------------------|------------------------------------------|--------------|-------------------------|--------------|
|                               | 2015-16 (Final)                          |              | 2016-17 (3rd Adv. Est.) |              |
|                               | Area                                     | Production   | Area                    | Production   |
| (1)                           | (2)                                      | (3)          | (4)                     | (5)          |
| <b>Fruits</b>                 |                                          |              |                         |              |
| Almond                        | 12                                       | 8            | 12                      | 8            |
| Aonla/Gooseberry              | 88                                       | 972          | 91                      | 1025         |
| Apple                         | 277                                      | 2521         | 278                     | 2258         |
| Banana                        | 841                                      | 29135        | 852                     | 30275        |
| Ber                           | 44                                       | 425          | 50                      | 526          |
| Citrus                        |                                          |              |                         |              |
| (i) Lime/Lemon                | 245                                      | 2438         | 240                     | 2555         |
| (ii) Mandarin                 | 397                                      | 4113         | 424                     | 4640         |
| (iii) Sweet Orange( Mosambi)  | 244                                      | 3468         | 209                     | 3187         |
| (iv) Others                   | 138                                      | 1562         | 165                     | 1670         |
| <b>Citrus Total (i to iv)</b> | <b>1024</b>                              | <b>11581</b> | <b>1037</b>             | <b>12053</b> |
| Custardapple                  | 37                                       | 298          | 45                      | 385          |
| Grapes                        | 122                                      | 2590         | 136                     | 2784         |
| Guava                         | 255                                      | 4048         | 260                     | 3615         |
| Jackfruit                     | 151                                      | 1732         | 153                     | 1722         |
| Kiwi                          | 4                                        | 11           | 4                       | 12           |
| Litchi                        | 90                                       | 559          | 91                      | 578          |
| Mango                         | 2209                                     | 18643        | 2267                    | 20295        |
| Muskmelon                     | 45                                       | 935          | 47                      | 987          |
| Papaya                        | 132                                      | 5667         | 138                     | 6145         |
| Passion Fruit                 | 13                                       | 78           | 14                      | 86           |
| Peach                         | 18                                       | 107          | 18                      | 105          |
| Pear                          | 40                                       | 323          | 42                      | 352          |
| Picanut                       | 1                                        | 1            | 1                       | 1            |
| Pineapple                     | 110                                      | 1924         | 114                     | 1969         |
| Plum                          | 22                                       | 82           | 23                      | 80           |
| Pomegranate                   | 197                                      | 2306         | 216                     | 2521         |
| Sapota                        | 107                                      | 1294         | 105                     | 1252         |
| Strawberry                    | 1                                        | 5            | 1                       | 5            |
| Walnut                        | 92                                       | 229          | 93                      | 230          |
| Watermelon                    | 95                                       | 2325         | 91                      | 2169         |
| Others                        | 275                                      | 2386         | 279                     | 2268         |
| <b>Total Fruits</b>           | <b>6301</b>                              | <b>90183</b> | <b>6457</b>             | <b>93707</b> |
| <b>Vegetables</b>             |                                          |              |                         |              |
| Beans                         | 232                                      | 2334         | 230                     | 2408         |
| Bittergourd                   | 93                                       | 1046         | 98                      | 1106         |
| Bottlegourd                   | 149                                      | 2458         | 155                     | 2573         |
| Brinjal                       | 663                                      | 12515        | 727                     | 12323        |
| Cabbage                       | 394                                      | 8806         | 394                     | 8720         |
| Capsicum                      | 46                                       | 288          | 24                      | 333          |
| Carrot                        | 82                                       | 1338         | 88                      | 1379         |
| Cauliflower                   | 426                                      | 8090         | 451                     | 8484         |
| Cucumber                      | 71                                       | 1202         | 77                      | 1246         |
| Chillies (Green)              | 292                                      | 2955         | 292                     | 3390         |
| Elephant Foot Yam             | 28                                       | 733          | 29                      | 731          |
| Mushroom                      | 170                                      | 436          | 183                     | 459          |
| Okra/Ladyfinger               | 511                                      | 5849         | 501                     | 5783         |
| Onion                         | 1320                                     | 20931        | 1293                    | 21718        |
| Parwal/Pointed gourd          | 18                                       | 264          | 20                      | 289          |
| Peas                          | 498                                      | 4811         | 540                     | 5252         |

contd.

| Crops                   | Production in '000 MT |               |                         |               |
|-------------------------|-----------------------|---------------|-------------------------|---------------|
|                         | 2015-16 (Final)       |               | 2016-17 (3rd Adv. Est.) |               |
|                         | Area                  | Production    | Area                    | Production    |
| (1)                     | (2)                   | (3)           | (4)                     | (5)           |
| Potato                  | 2117                  | 43417         | 2151                    | 48237         |
| Radish                  | 199                   | 2844          | 203                     | 2889          |
| Pumpkin/Sitaphal/Kaddu  | 68                    | 1509          | 72                      | 1611          |
| Sweet Potato            | 126                   | 1454          | 132                     | 1473          |
| Tapioca                 | 204                   | 4344          | 203                     | 4421          |
| Tomato                  | 774                   | 18732         | 799                     | 19542         |
| Others                  | 1625                  | 22707         | 1631                    | 21811         |
| <b>Total Vegetables</b> | <b>10106</b>          | <b>169064</b> | <b>10295</b>            | <b>176177</b> |
| <b>Aromatic</b>         | 634                   | 1022          | 665                     | 1042          |
| Flowers Cut             |                       | 528           |                         | 582           |
| Flowers Loose           | 278                   | 1656          | 328                     | 1695          |
| <b>Total Flowers</b>    | <b>278</b>            | <b>2184</b>   | <b>328</b>              | <b>2277</b>   |
| <b>Honey</b>            |                       | 88            |                         | 95            |
| <b>Plantation Crops</b> |                       |               |                         |               |
| Areca nut               | 474                   | 714           | 459                     | 718           |
| Cashewnut               | 1036                  | 671           | 1041                    | 779           |
| Cocoa                   | 81                    | 17            | 83                      | 19            |
| Coconut                 | 2088                  | 15256         | 2076                    | 16837         |
| <b>Total Plantation</b> | <b>3680</b>           | <b>16658</b>  | <b>3659</b>             | <b>18353</b>  |
| <b>Spices</b>           |                       |               |                         |               |
| Ajwain                  | 24                    | 16            | 29                      | 26            |
| Cardamom                | 86                    | 24            | 85                      | 28            |
| Chillies (Dried)        | 811                   | 1520          | 845                     | 2126          |
| Cinnamon/Tejpata        | 3                     | 5             | 3                       | 5             |
| Celery, Dill & Poppy    | 26                    | 23            | 36                      | 35            |
| Clove                   | 2                     | 1             | 2                       | 1             |
| Coriander               | 582                   | 585           | 704                     | 900           |
| Cumin                   | 808                   | 503           | 781                     | 489           |
| Fenugreek               | 219                   | 247           | 210                     | 256           |
| Fennel                  | 76                    | 129           | 91                      | 153           |
| Garlic                  | 281                   | 1617          | 322                     | 1697          |
| Ginger                  | 164                   | 1109          | 168                     | 1076          |
| Nutmeg                  | 21                    | 14            | 23                      | 15            |
| Pepper                  | 129                   | 55            | 131                     | 72            |
| Vanilla                 | 4                     | 0             | 4                       | 0             |
| Tamarind                | 53                    | 194           | 49                      | 191           |
| Turmeric                | 186                   | 943           | 222                     | 1132          |
| <b>Total Spices</b>     | <b>3474</b>           | <b>6988</b>   | <b>3705</b>             | <b>8202</b>   |
| <b>Total</b>            | <b>24472</b>          | <b>286188</b> | <b>25109</b>            | <b>299853</b> |

Source : Department of Agriculture, Cooperation & Farmers Welfare

**Table 6.2: All-India Area, Production and Yield of Potato and Onion**

Area - Million Hectares  
 Production - Million Tonnes  
 Yield - Kg./Hectare

| Year                    | Potato |            |       | Onion |            |       |
|-------------------------|--------|------------|-------|-------|------------|-------|
|                         | Area   | Production | Yield | Area  | Production | Yield |
| (1)                     | (2)    | (3)        | (4)   | (5)   | (6)        | (7)   |
| 1980-81                 | 0.73   | 9.67       | 13258 | 0.25  | 2.50       | 9961  |
| 1990-91                 | 0.94   | 15.21      | 16254 | 0.30  | 3.23       | 10686 |
| 2000-01                 | 1.22   | 22.49      | 18404 | 0.42  | 4.55       | 10786 |
| 2010-11                 | 1.86   | 42.34      | 22724 | 1.06  | 15.12      | 14210 |
| 2011-12                 | 1.91   | 41.48      | 21753 | 1.09  | 17.51      | 16109 |
| 2012-13                 | 1.99   | 45.34      | 22760 | 1.05  | 16.81      | 15989 |
| 2013-14                 | 1.97   | 41.56      | 21060 | 1.20  | 19.40      | 16120 |
| 2014-15                 | 2.08   | 48.01      | 23126 | 1.17  | 18.93      | 16111 |
| 2015-16                 | 2.11   | 43.40      | 20569 | 1.32  | 20.93      | 15857 |
| 2016-17 (3rd Adv. Est.) | 2.15   | 48.23      | 22433 | 1.29  | 21.72      | 16801 |

Source : Department of Agriculture, Cooperation & Farmers Welfare

**Table 6.3: All-India Area, Production and Yield of Banana**

Area - Million Hectares  
 Production - Million Tonnes  
 Yield - Kg./Hectare

| Year                    | Banana |            |       |
|-------------------------|--------|------------|-------|
|                         | Area   | Production | Yield |
| (1)                     | (2)    | (3)        | (4)   |
| 2000-01                 | 0.46   | 12.90      | 28133 |
| 2009-10                 | 0.77   | 26.47      | 34363 |
| 2010-11                 | 0.83   | 29.78      | 35880 |
| 2011-12                 | 0.80   | 28.46      | 35725 |
| 2012-13                 | 0.78   | 26.51      | 34161 |
| 2013-14                 | 0.80   | 29.72      | 37037 |
| 2014-15                 | 0.82   | 29.22      | 35549 |
| 2015-16                 | 0.84   | 29.13      | 34635 |
| 2016-17 (3rd Adv. Est.) | 0.85   | 30.28      | 35544 |

Source : Department of Agriculture, Cooperation & Farmers Welfare



**Table:6.4 Foodgrain and Horticulture Production in India**

| (Million Tonnes) |                       |                         |
|------------------|-----------------------|-------------------------|
| Year             | Foodgrains Production | Horticulture Production |
| (1)              | (2)                   | (3)                     |
| 2004-05          | 198.36                | 166.94                  |
| 2005-06          | 208.60                | 182.82                  |
| 2006-07          | 217.28                | 191.81                  |
| 2007-08          | 230.78                | 211.24                  |
| 2008-09          | 234.47                | 214.72                  |
| 2009-10          | 218.11                | 223.09                  |
| 2010-11          | 244.50                | 240.53                  |
| 2011-12          | 259.29                | 257.28                  |
| 2012-13          | 257.13                | 268.85                  |
| 2013-14          | 265.57                | 277.35                  |
| 2014-15          | 252.02                | 280.99                  |
| 2015-16          | 251.57                | 286.19                  |
| 2016-17*         | 275.68                | 299.85                  |

\* 4th Advance Estimate for Food grain production and 3rd Advance Estimate for Horticulture Production

Source: Department of Agriculture, Cooperation & Farmers Welfare

**Chart 6(a): Trends in Foodgrain and Horticulture Production**

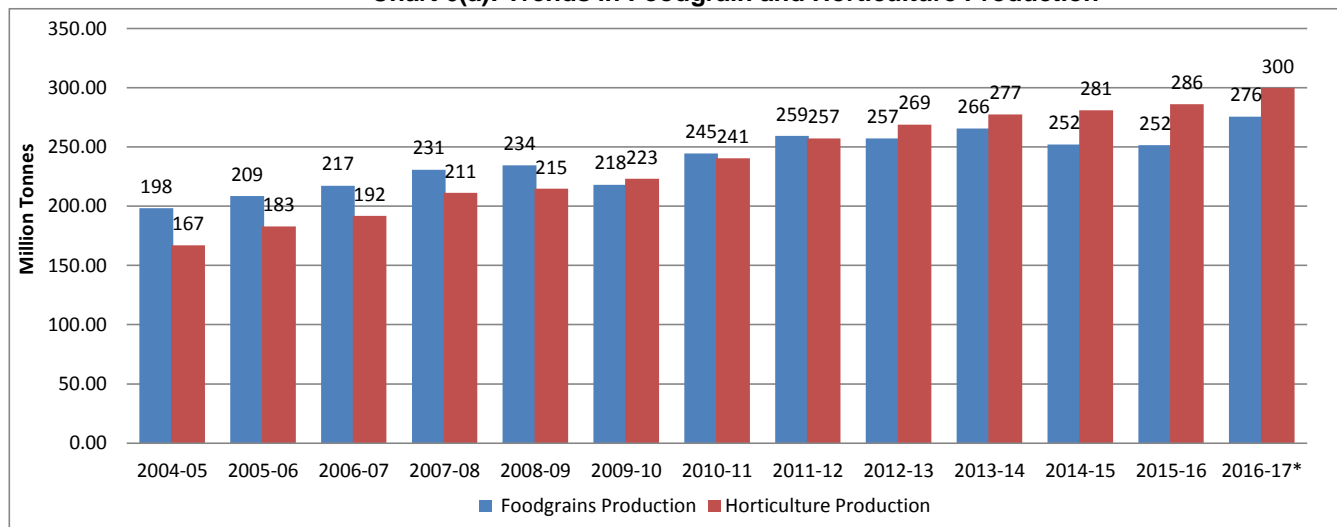

Source: Department of Agriculture, Cooperation & Farmers Welfare

**Table 6.5: Value of Output from Horticulture Crops vis-à-vis All Agricultural Crops (at 2011-12 prices)**

| Item/Year                                                                          | (₹ in '00 crores) |              |              |              |              |
|------------------------------------------------------------------------------------|-------------------|--------------|--------------|--------------|--------------|
|                                                                                    | 2011-12           | 2012-13      | 2013-14      | 2014-15      | 2015-16      |
| (1)                                                                                | (2)               | (3)          | (4)          | (5)          | (6)          |
| i) Total Fruits & Vegetables                                                       | 2657              | 2793         | 2929         | 3037         | 3094         |
| ii) Total Condiments & Spices                                                      | 385               | 377          | 416          | 442          | 464          |
| iii) Total Floriculture                                                            | 174               | 173          | 178          | 169          | 176          |
| iv) Total Plantation crops                                                         | 257               | 253          | 255          | 270          | 271          |
| <b>I. Total Horticulture crops (i+ii+iii+iv)</b>                                   | <b>3473</b>       | <b>3596</b>  | <b>3778</b>  | <b>3918</b>  | <b>4005</b>  |
| <b>II. All Agricultural crops</b>                                                  | <b>11915</b>      | <b>11986</b> | <b>12571</b> | <b>12278</b> | <b>12147</b> |
| Percentage share of Value of Output from Horticulture to total Agricultural Output | 29.1              | 30.0         | 30.1         | 31.9         | 33.0         |

Source: National Accounts Statistics 2017, CSO

# LIVESTOCK STATISTICS

**Table 7.1: Livestock Population in India**

| Species                | (Million Numbers) |               |               |               |               |               |               |               |
|------------------------|-------------------|---------------|---------------|---------------|---------------|---------------|---------------|---------------|
|                        | 1951              | 1982          | 1987          | 1992          | 1997          | 2003          | 2007          | 2012          |
| (1)                    | (2)               | (3)           | (4)           | (5)           | (6)           | (7)           | (8)           | (9)           |
| Cattle                 | 155.30            | 192.45        | 199.69        | 204.58        | 198.88        | 185.18        | 199.08        | 190.90        |
| Buffalo                | 43.40             | 69.78         | 75.97         | 84.21         | 89.92         | 97.92         | 105.34        | 108.70        |
| <b>Total Bovines</b>   | <b>198.70</b>     | <b>262.36</b> | <b>275.82</b> | <b>289.00</b> | <b>289.00</b> | <b>283.10</b> | <b>304.76</b> | <b>299.98</b> |
| Sheep                  | 39.10             | 48.76         | 45.70         | 50.78         | 57.49         | 61.47         | 71.56         | 65.07         |
| Goats                  | 47.20             | 95.25         | 110.21        | 115.28        | 122.72        | 124.36        | 140.54        | 135.17        |
| Horses & Ponies        | 1.50              | 0.90          | 0.80          | 0.82          | 0.83          | 0.75          | 0.61          | 0.63          |
| Camels                 | 0.60              | 1.08          | 1.00          | 1.03          | 0.91          | 0.63          | 0.52          | 0.40          |
| Pigs                   | 4.40              | 10.07         | 10.63         | 12.79         | 13.29         | 13.52         | 11.13         | 10.29         |
| Mules                  | 0.06              | 0.13          | 0.17          | 0.19          | 0.22          | 0.18          | 0.14          | 0.20          |
| Donkeys                | 1.30              | 1.02          | 0.96          | 0.97          | 0.88          | 0.65          | 0.44          | 0.32          |
| Yaks                   | NC                | 0.13          | 0.04          | 0.06          | 0.06          | 0.06          | 0.08          | 0.08          |
| <b>Total Livestock</b> | <b>292.80</b>     | <b>419.59</b> | <b>445.29</b> | <b>470.86</b> | <b>485.39</b> | <b>485.00</b> | <b>529.70</b> | <b>512.06</b> |
| Poultry                | 73.50             | 207.74        | 275.32        | 307.07        | 347.61        | 489.1         | 648.88        | 729.21        |
| Dogs                   | NC                | 18.54         | 17.95         | 21.77         | 25.48         | 29.03         | 19.09         | 11.67         |
| Rabbits                | NC                | NC            | NC            | NC            | NC            | 0.48          | 0.42          | 0.59          |

Source: Department of Animal Husbandry, Dairying & Fisheries.

NC : Not Collected

Note: Total may not tally due to rounding off

**Table 7.2 All India Production of Milk, Eggs and Wool**

| Year    | Milk<br>(Million Tonnes) | Eggs<br>(Billion Nos.) | Wool<br>(Million Kgs.) |
|---------|--------------------------|------------------------|------------------------|
| (1)     | (2)                      | (3)                    | (4)                    |
| 1990-91 | 53.9                     | 21.1                   | 41.2                   |
| 2000-01 | 80.6                     | 36.6                   | 48.4                   |
| 2009-10 | 116.4                    | 60.3                   | 43.1                   |
| 2010-11 | 121.8                    | 63.0                   | 43.0                   |
| 2011-12 | 127.9                    | 66.5                   | 44.7                   |
| 2012-13 | 132.4                    | 69.7                   | 46.1                   |
| 2013-14 | 137.7                    | 74.8                   | 47.9                   |
| 2014-15 | 146.3                    | 78.5                   | 48.1                   |
| 2015-16 | 155.5                    | 82.9                   | 43.6                   |
| 2016-17 | 163.7                    | 88.1                   | 43.5                   |

Source: Department of Animal Husbandry, Dairying & Fisheries.

**Table 7.3 Fish Production in India**

| Year        | Marine | Inland | Total |
|-------------|--------|--------|-------|
| (1)         | (2)    | (3)    | (4)   |
| 1950-51     | 534    | 218    | 752   |
| 1980-81     | 1555   | 887    | 2442  |
| 1990-91     | 2300   | 1536   | 3836  |
| 2000-01     | 2811   | 2845   | 5656  |
| 2009-10     | 3104   | 4894   | 7998  |
| 2010-11     | 3250   | 4981   | 8231  |
| 2011-12     | 3372   | 5294   | 8666  |
| 2012-13     | 3321   | 5719   | 9040  |
| 2013-14     | 3443   | 6136   | 9579  |
| 2014-15     | 3569   | 6691   | 10260 |
| 2015-16     | 3600   | 7162   | 10762 |
| 2016-17 (P) | 3641   | 7768   | 11409 |

Source: Department of Animal Husbandry Dairying & Fisheries

(P) : Provisional

# AGRICULTURAL INPUTS, COSTS & PRICES

**Table 8.1: Production and Use of Agricultural Inputs in India**

| Programme                                                      | Unit            | 2000-01 | 2010-11 | 2011-12 | 2012-13 | 2013-14 | 2014-15 | 2015-16 | 2016-17 |
|----------------------------------------------------------------|-----------------|---------|---------|---------|---------|---------|---------|---------|---------|
| (1)                                                            | (2)             | (3)     | (4)     | (5)     | (6)     | (7)     | (8)     | (9)     | (10)    |
| <b>1. Seeds</b>                                                |                 |         |         |         |         |         |         |         |         |
| (i) Production of Breeder Seeds                                | Thousand Qtls.  | 42.69   | 118.85  | 123.38  | 110.20  | 82.29   | 86.21   | 90.37   | 110.71  |
| (ii) Production of Foundation Seeds                            | Lakh Qtls.      | 5.91    | 17.53   | 22.36   | 16.17   | 17.43   | 15.76   | 14.95   | 22.09   |
| (iii) Distribution of Certified/Quality Seeds                  | Lakh Qtls.      | 86.27   | 277.34  | 294.85  | 313.44  | 301.39  | 303.12  | 304.04  | 348.58  |
| <b>2. Consumption of Chemical Fertilisers</b>                  |                 |         |         |         |         |         |         |         |         |
| Nitrogenous (N)                                                | Lakh Tonnes     | 109.20  | 165.58  | 173.00  | 168.21  | 167.50  | 169.46  | 173.72  | 167.35  |
| Phosphatic(P)                                                  | Lakh Tonnes     | 42.15   | 80.50   | 79.14   | 66.53   | 56.33   | 60.98   | 69.79   | 67.05   |
| Potassic(K)                                                    | Lakh Tonnes     | 15.67   | 35.14   | 25.76   | 20.62   | 20.99   | 25.32   | 24.02   | 25.08   |
| Total (N+P+K)                                                  | Lakh Tonnes     | 167.02  | 281.22  | 277.90  | 255.36  | 244.82  | 255.76  | 267.53  | 259.49  |
| Per Hectare *                                                  | Kg.             | 89.63   | 142.52  | 142.05  | 131.36  | 118.49  | 127.45  | 130.66  | 123.41  |
| <b>3. Consumption of Pesticides (Technical Grade Material)</b> |                 |         |         |         |         |         |         |         |         |
|                                                                | Thousand Tonnes | 43.58   | 55.54   | 52.98   | 45.62   | 60.28   | 56.12   | 50.41   | 52.75** |
| <b>4. Area Covered Under Soil Conservation (Cumulative)</b>    |                 |         |         |         |         |         |         |         |         |
|                                                                | Lakh Hectares   | 4.36    | 7.49    | 4.72    | 5.46    | -       | -       | -       | -       |

\* Per capita consumption from Gross Cropped Area upto 2016-17 is based on State Governments estimates

\*\* as on 20.11.2017 (doesn't include information from State of Telangan and Assam)

# : Soil Conservation programmes namely; National Watershed Development Project for Rainfed Areas, Centrally Sponsored Programme of Soil Conservation in the catchment of River Valley & Flood Prone Rivers (RVP&FPR), Reclamation & Development of Alkali & Acid Soils (RDAAS) Watershed Development Project in Shifting Cultivation Area (WDPSA), Watershed Development Fund have been closed from 1st April 2013.

Source: Department of Agriculture, Cooperation & Farmers Welfare

**Table 8.2 : Crop-wise requirement and availability of Certified/ Quality Seeds**

(Lakh Quintals)

| Year               | 2014-15          |               |               | 2015-16       |                  |               | 2016-17       |               |                  |               |               |               |
|--------------------|------------------|---------------|---------------|---------------|------------------|---------------|---------------|---------------|------------------|---------------|---------------|---------------|
|                    | Require-<br>ment | Availability  |               |               | Require-<br>ment | Availability  |               |               | Require-<br>ment | Availability  |               |               |
|                    |                  | Public        | Private       | Total         |                  | Public        | Private       | Total         |                  | Public        | Private       | Total         |
| Crop Name<br>(1)   | (2)              | (3)           | (4)           | (5)           | (6)              | (7)           | (8)           | (9)           | (10)             | (11)          | (12)          | (13)          |
| Wheat              | 112.53           | 44.78         | 72.07         | 116.86        | 113.46           | 51.25         | 66.73         | 117.98        | 117.55           | 61.67         | 74.91         | 136.58        |
| Paddy              | 84.8             | 46.46         | 46.46         | 92.92         | 82.86            | 47.96         | 47.14         | 95.1          | 87.74            | 63.14         | 37.33         | 100.47        |
| Ragi               | 0.31             | 0.25          | 0.11          | 0.36          | 0.32             | 0.47          | 0.07          | 0.53          | 0.34             | 0.43          | 0.13          | 0.56          |
| Barley             | 2.23             | 0.61          | 2.26          | 2.87          | 2.25             | 0.69          | 2.48          | 3.17          | 2.44             | 0.58          | 2.37          | 2.95          |
| Maize              | 10.84            | 1.15          | 11.1          | 12.25         | 10.7             | 0.73          | 11.96         | 12.69         | 12.47            | 1.67          | 11.87         | 13.54         |
| Bajra              | 2.42             | 0.16          | 2.53          | 2.69          | 2.55             | 0.27          | 2.57          | 2.84          | 2.36             | 0.25          | 2.39          | 2.64          |
| Jowar              | 2.42             | 0.62          | 2.13          | 2.75          | 2.95             | 0.77          | 2.39          | 3.16          | 2.82             | 0.80          | 2.09          | 2.89          |
| Other Cereals      | 0.03             | 0.02          | 0.02          | 0.04          | 0.05             | 0.01          | 0.06          | 0.06          | 0.07             | 0.04          | 0.05          | 0.09          |
| <b>Total</b>       | <b>215.58</b>    | <b>94.06</b>  | <b>136.68</b> | <b>230.74</b> | <b>215.15</b>    | <b>102.14</b> | <b>133.39</b> | <b>235.53</b> | <b>225.79</b>    | <b>128.58</b> | <b>131.14</b> | <b>259.72</b> |
| Gram               | 16.11            | 12.36         | 3.36          | 15.72         | 18.14            | 7.3           | 7.56          | 14.86         | 17.65            | 9.95          | 6.05          | 16.00         |
| Urd                | 2.68             | 2             | 1.31          | 3.31          | 2.62             | 1.36          | 1.36          | 2.71          | 2.67             | 1.79          | 1.11          | 2.90          |
| Cowpea             | 0.36             | 0.2           | 0.15          | 0.35          | 0.26             | 0.14          | 0.15          | 0.29          | 0.19             | 0.14          | 0.09          | 0.23          |
| Moong              | 2.79             | 1.72          | 1.58          | 3.31          | 2.87             | 1.63          | 1.6           | 3.23          | 2.68             | 1.90          | 1.37          | 3.27          |
| Horse Gram         | 0.17             | 0.07          | 0.11          | 0.18          | 0.24             | 0.04          | 0.18          | 0.22          | 0.26             | 0.26          | 0.10          | 0.36          |
| Lentil             | 1.79             | 0.53          | 0.85          | 1.38          | 1.3              | 0.35          | 0.71          | 1.06          | 1.47             | 0.44          | 0.72          | 1.16          |
| Lathyrus           | 0.01             | 0.01          | -             | 0.01          | 0                | 0.01          | 0             | 0.01          | 0.08             | 0.05          | 0.03          | 0.08          |
| Peas               | 1.96             | 0.5           | 1.06          | 1.57          | 2.12             | 0.59          | 1.24          | 1.83          | 2.67             | 1.41          | 1.50          | 2.91          |
| Grain Amaranthus   |                  |               |               |               | 0                | 0             | 0             | 0             |                  |               |               | 0.00          |
| Moth               | 0.25             | 0.07          | 0.06          | 0.14          | 0.21             | 0.02          | 0.11          | 0.13          | 0.20             | 0.11          | 0.10          | 0.21          |
| Arhar              | 2.64             | 1.15          | 1.63          | 2.78          | 2.51             | 1.11          | 1.6           | 2.72          | 2.71             | 1.32          | 1.65          | 2.97          |
| Rajma              | 0                | 0             | -             | 0             | 0.06             | 0.03          | 0.03          | 0.06          | 0.02             | 0.04          |               | 0.04          |
| Kehsari            | 0.06             | 0.02          | 0.04          | 0.06          | 0.06             | 0.03          | 0.03          | 0.06          |                  |               |               | 0.00          |
| Indian bean        | 0.07             | 0             | 0.07          | 0.07          | 0.08             | 0.01          | 0.07          | 0.08          | 0.21             | 0.04          | 0.17          | 0.21          |
| Rice bean          | 0                | -             | 0             | 0             | 0                | 0             | 0             | 0             | 0.01             | 0.01          |               | 0.01          |
| Faba bean          |                  |               |               |               |                  |               |               |               | 0.01             | 0.01          |               | 0.01          |
| Guar               |                  |               |               |               |                  |               |               |               | 0.81             | 0.17          | 0.77          | 0.94          |
| Other Local Pulses |                  |               |               |               |                  |               |               |               | 0.00             |               |               | 0.00          |
| <b>Total</b>       | <b>28.88</b>     | <b>18.63</b>  | <b>10.24</b>  | <b>28.87</b>  | <b>30.49</b>     | <b>12.61</b>  | <b>14.63</b>  | <b>27.24</b>  | <b>31.64</b>     | <b>17.64</b>  | <b>13.66</b>  | <b>31.30</b>  |
| Castor             | 0.72             | 0.19          | 0.66          | 0.85          | 0.61             | 0.16          | <b>0.47</b>   | 0.62          | 0.58             | 0.11          | 0.73          | 0.84          |
| R/Mustard          | 2.64             | 1.45          | 1.25          | 2.7           | 2.52             | 1.19          | 1.46          | 2.65          | 2.49             | 1.24          | 1.23          | 2.47          |
| Groundnut          | 28.47            | 18.1          | 11.9          | 29.99         | 24.3             | (18)          | 11.72         | 23.64         | 23.48            | 15.78         | 9.38          | 25.16         |
| Niger              | 0.02             | 0.01          | 0.01          | 0.02          | 0.01             | 0.01          | 0             | 0.01          | 0.01             | 0.01          | 0             | 0.01          |
| Til                | 0.31             | 0.14          | 0.23          | 0.37          | 0.32             | 0.16          | 0.21          | 0.36          | 0.28             | 0.22          | 0.18          | 0.40          |
| Linseed            | 0.12             | 0.01          | 0.08          | 0.08          | 0.08             | 0.01          | 0.03          | 0.04          | 0.13             | 0.07          | 0.04          | 0.11          |
| Soybean            | 34.29            | 10.96         | 16.37         | 27.33         | 31.02            | 11.4          | 12.04         | 23.45         | 29.00            | 12.62         | 17.02         | 29.64         |
| Sunflower          | 0.45             | 0.04          | 0.42          | 0.46          | 0.48             | 0.04          | 0.47          | 0.51          | 0.39             | 0.01          | 0.39          | 0.40          |
| Safflower          | 0.12             | 0.02          | 0.1           | 0.12          | 0.1              | 0.02          | 0.09          | 0.11          | 0.12             | 0.02          | 0.11          | 0.13          |
| <b>Total</b>       | <b>67.13</b>     | <b>30.91</b>  | <b>31.02</b>  | <b>61.93</b>  | <b>59.45</b>     | <b>24.9</b>   | <b>26.49</b>  | <b>51.39</b>  | <b>56.48</b>     | <b>30.08</b>  | <b>29.08</b>  | <b>59.16</b>  |
| Cotton             | 2.22             | 0.05          | 2.57          | 2.63          | 1.95             | 0.22          | 1.86          | 2.08          | 2.22             | 0.13          | 2.22          | 2.35          |
| Jute/Mesta         | 0.45             | 0.19          | 0.42          | 0.61          | 0.36             | 0.11          | 0.03          | 0.14          | 0.43             | 0.3           | 0.08          | 0.38          |
| <b>Total</b>       | <b>2.68</b>      | <b>0.24</b>   | <b>3</b>      | <b>3.24</b>   | <b>2.31</b>      | <b>0.33</b>   | <b>1.89</b>   | <b>2.22</b>   | <b>2.65</b>      | <b>0.43</b>   | <b>2.30</b>   | <b>2.73</b>   |
| Potato             | 27.19            | 6.74          | 18.11         | 24.85         | 28.64            | 6.91          | 19.19         | 26.1          | 36.53            | 7.26          | 19.82         | 27.09         |
| Fodders            | 2.09             | 0.51          | 1.63          | 2.14          | 1.05             | 0.39          | 0.65          | 1.05          | 0.37             | 0.25          | 0.09          | 0.34          |
| <b>Grand Total</b> | <b>343.56</b>    | <b>151.09</b> | <b>200.68</b> | <b>351.77</b> | <b>337.09</b>    | <b>147.28</b> | <b>196.24</b> | <b>343.52</b> | <b>353.46</b>    | <b>184.24</b> | <b>196.09</b> | <b>380.34</b> |

Source: Department of Agriculture, Cooperation & Farmers Welfare



**Table 8.3: Crop-wise requirement and availability of Certified/ Quality of Hybrid Seeds**

(Thousand Tonnes)

| S.No.        | Crop      | 2010-11       |               | 2011-12       |               | 2012-13       |               | 2013-14       |               | 2014-15       |               | 2015-16       |               | 2016-17       |               |
|--------------|-----------|---------------|---------------|---------------|---------------|---------------|---------------|---------------|---------------|---------------|---------------|---------------|---------------|---------------|---------------|
|              |           | Req.          | Av.           | Req.          | Av.           | Req.          | Av.           | Req.          | Av.           | Req.          | Av.           | Req.          | Av.           | Req.          | Av.           |
| (1)          | (2)       | (3)           | (4)           | (5)           | (6)           | (7)           | (8)           | (9)           | (10)          | (11)          | (12)          | (13)          | (14)          | (15)          | (16)          |
| 1            | Paddy     | 9.80          | 10.90         | 9.90          | 9.20          | 31.60         | 31.30         | 42.80         | 34.20         | 15.10         | 19.50         | 38.50         | 61.40         | 19.21         | 22.09         |
| 2            | Maize     | 75.40         | 92.20         | 101.70        | 122.00        | 97.00         | 103.40        | 94.00         | 96.60         | 93.50         | 106.90        | 101.60        | 120.50        | 100.20        | 125.29        |
| 3            | Jowar     | 11.50         | 13.90         | 13.00         | 13.90         | 13.20         | 13.90         | 7.90          | 10.20         | 15.60         | 19.00         | 17.70         | 20.00         | 13.25         | 19.57         |
| 4            | Bajra     | 21.90         | 26.00         | 24.60         | 28.40         | 24.00         | 27.10         | 23.60         | 33.20         | 21.00         | 24.80         | 24.10         | 26.60         | 19.64         | 24.98         |
| 5            | Arhar     | 0.06          | 0.06          | 0.02          | 0.02          | 0.00          | 0.01          | 0.00          | 0.00          | 0.09          | 0.09          | 0.10          | 0.00          | 0.00          | 0.00          |
| 6            | Sunflower | 5.80          | 6.30          | 6.90          | 9.60          | 6.40          | 6.60          | 4.90          | 5.40          | 2.90          | 3.00          | 4.40          | 4.60          | 6.10          | 6.26          |
| 7            | Safflower | 0.05          | 0.00          | 0.01          | 0.00          | 0.00          | 0.00          | 0.00          | 0.00          | 0.00          | 0.00          | 0.00          | 0.00          | 0.00          | 0.00          |
| 8            | Castor    | 2.50          | 3.10          | 3.37          | 4.50          | 4.00          | 4.30          | 3.40          | 4.30          | 7.10          | 8.40          | 6.00          | 6.10          | 4.91          | 5.78          |
| 9            | Cotton    | 14.40         | 15.60         | 19.50         | 22.50         | 22.40         | 25.40         | 15.90         | 17.90         | 17.90         | 21.70         | 18.70         | 19.80         | 18.36         | 19.73         |
| <b>Total</b> |           | <b>141.41</b> | <b>168.06</b> | <b>179.00</b> | <b>210.12</b> | <b>198.60</b> | <b>212.01</b> | <b>192.50</b> | <b>201.80</b> | <b>173.19</b> | <b>203.39</b> | <b>211.10</b> | <b>259.00</b> | <b>181.68</b> | <b>223.69</b> |

Req.: Requirement Av: Availability

Source: Department of Agriculture, Cooperation &amp; Farmers Welfare

**Table 8.4 : Consumption, Production and Import of Fertilisers in terms of Nutrients (N, P & K)**

| Year    | (Lakh Tonnes) |       |       |        |            |       |        |         |       |       |        |           | C & F Value<br>of Urea<br>Imports<br>(₹ Crore) |
|---------|---------------|-------|-------|--------|------------|-------|--------|---------|-------|-------|--------|-----------|------------------------------------------------|
|         | Consumption   |       |       |        | Production |       |        | Imports |       |       |        |           |                                                |
|         | N             | P     | K     | TOTAL  | N          | P     | TOTAL  | N       | P     | K     | TOTAL  |           |                                                |
| (1)     | (2)           | (3)   | (4)   | (5)    | (6)        | (7)   | (8)    | (9)     | (10)  | (11)  | (12)   | (13)      |                                                |
| 1981-82 | 40.69         | 13.22 | 6.73  | 60.64  | 31.44      | 9.49  | 40.93  | 10.54   | 3.43  | 6.44  | 20.41  | 716.62    |                                                |
| 1990-91 | 79.97         | 32.21 | 13.28 | 125.46 | 69.93      | 20.52 | 90.45  | 4.14    | 10.16 | 13.28 | 27.58  | 1335.82   |                                                |
| 2000-01 | 109.20        | 42.15 | 15.67 | 167.02 | 109.61     | 37.43 | 147.04 | 1.54    | 3.96  | 15.41 | 20.91  | #         |                                                |
| 2010-11 | 165.58        | 80.50 | 35.14 | 281.22 | 121.57     | 42.23 | 163.80 | 44.92   | 38.02 | 40.69 | 123.63 | 8348.89   |                                                |
| 2011-12 | 173.00        | 79.14 | 25.75 | 277.90 | 122.59     | 43.68 | 166.27 | 52.40   | 44.27 | 33.35 | 130.02 | 15442.02  |                                                |
| 2012-13 | 168.21        | 66.53 | 20.62 | 255.36 | 121.94     | 38.30 | 160.24 | 46.90   | 27.78 | 12.30 | 86.98  | 15980.22  |                                                |
| 2013-14 | 167.50        | 56.33 | 20.99 | 244.82 | 123.78     | 39.60 | 163.38 | 38.08   | 15.90 | 13.33 | 67.31  | 14987.95  |                                                |
| 2014-15 | 169.45        | 60.98 | 25.32 | 255.76 | 123.94     | 41.21 | 165.15 | 47.66   | 18.32 | 25.37 | 91.35  | 12035.26  |                                                |
| 2015-16 | 173.72        | 69.79 | 24.02 | 267.53 | 134.16     | 43.94 | 178.10 | 50.68   | 28.88 | 20.53 | 100.09 | 13984.93  |                                                |
| 2016-17 | 167.35        | 67.05 | 25.08 | 259.49 | 133.54     | 45.95 | 179.49 | 33.88   | 21.29 | 23.18 | 78.35  | 7024.32** |                                                |

# There was no import of Urea in 2000-01 in Government account.

\*\* Exchange rate is taken as 1 USD = Rs.67.07

Note : 1. Figures relate to imports made on Govt. Account only.

2. The imports made after decanalisation of phosphatic fertilisers (w.e.f. 17.9.1992) and potassic fertilisers (w.e.f. 17.6.1993) include the quantities imported by private parties also.

Source: Department of Fertilizers and Department of Agriculture, Cooperation & Farmers Welfare (DAC&FW)

**Chart 8(a): Trends in Consumption, Production and Imports of Fertilizers in India**

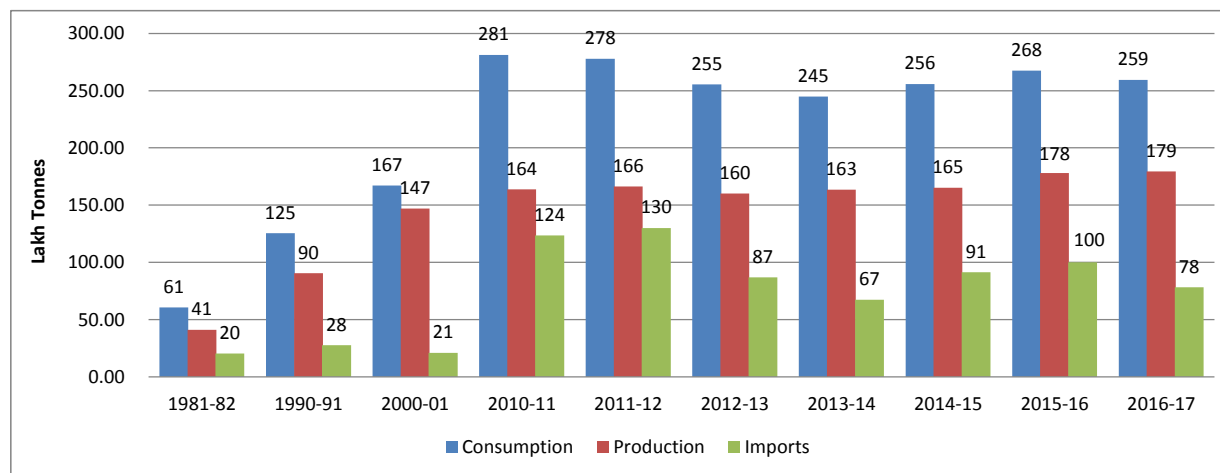

Source: Department of Fertilizers and Department of Agriculture, Cooperation & Farmers Welfare (DAC&FW)

**Table 8.5: Zone-wise Consumption of Fertilizers in terms of Nutrients (N, P & K)**

(Thousand Tonnes)

| <b>S.No.</b> | <b>State/Zone</b> | <b>2010-11</b>                     | <b>2011-12</b>                     | <b>2012-13</b>                     | <b>2013-14</b>                     | <b>2014-15</b>                     | <b>2015-16</b>                     | <b>2016-17</b>                     |
|--------------|-------------------|------------------------------------|------------------------------------|------------------------------------|------------------------------------|------------------------------------|------------------------------------|------------------------------------|
| (1)          | (2)               | (3)                                | (4)                                | (5)                                | (6)                                | (7)                                | (8)                                | (9)                                |
| 1            | South Zone        | 7150.24<br>(198.47)                | 7266.62<br>(211.13)                | 5519.08<br>(166.33)                | 6004.82<br>(164.05)                | 5985.38<br>(174.68)                | 6177.58<br>(179.46)                | <b>5788.00</b><br><b>(166.43)</b>  |
| 2            | West Zone         | 9152.32<br>(102.46)                | 8607.24<br>(97.84)                 | 7636.3<br>(87.33)                  | 8042.24<br>(85.93)                 | 8205.58<br>(92.61)                 | 8382.02<br>(93.85)                 | <b>8426.41</b><br><b>(90.38)</b>   |
| 3            | North Zone        | 7918.70<br>(183.87)                | 7922.37<br>(181.67)                | 8284.48<br>(191.11)                | 7039.97<br>(162.67)                | 7634.61<br>(173.58)                | 7906.44<br>(174.47)                | <b>7805.66</b><br><b>(170.18)</b>  |
| 4            | East Zone         | 3588.57<br>(158.06)                | 3683.41<br>(157.45)                | 3775.01<br>(156.11)                | 3078.25<br>(108.51)                | 3427.26<br>(118.47)                | 4001.47<br>(140.90)                | <b>3653.88</b><br><b>(125.07)</b>  |
| 5            | North East Zone   | 312.38<br>(50.39)                  | 310.36<br>(49.75)                  | 321.28<br>(51.42)                  | 317.13<br>(66.48)                  | 323.29<br>(65.97)                  | 285.09<br>(39.01)                  | <b>275.2</b><br><b>(38.41)</b>     |
| <b>6</b>     | <b>All India</b>  | <b>28122.21</b><br><b>(142.52)</b> | <b>27790.00</b><br><b>(142.05)</b> | <b>25536.15</b><br><b>(131.36)</b> | <b>24482.41</b><br><b>(118.49)</b> | <b>25576.12</b><br><b>(127.45)</b> | <b>26752.61</b><br><b>(130.66)</b> | <b>25949.15</b><br><b>(123.41)</b> |

Note : Figures in parentheses indicates estimated Consumption of Fertilizers (NPK) per hectare

Source: Department of Agriculture, Cooperation & Farmers Welfare

**Table 8.6 (a): State-wise Status of Soil Health Card Scheme Cycle-I as on 20.02.2018**

| S.No.                    | States                 | Cumulative Target for Soil Samples Collection & Testing during Cycle-I (2015-16 & 2016-17) | No. of Samples Collected (Cycle-I) | No. of Samples Tested (Cycle-I) | Cumulative Target for Printing & Distribution of SHCs for Cycle-I (2015-16 & 2016-17) | No. of SHCs Printed (Cycle-I) | No. of SHCs Distributed (Cycle-I) |
|--------------------------|------------------------|--------------------------------------------------------------------------------------------|------------------------------------|---------------------------------|---------------------------------------------------------------------------------------|-------------------------------|-----------------------------------|
| (1)                      | (2)                    | (3)                                                                                        | (4)                                | (5)                             | (6)                                                                                   | (7)                           | (8)                               |
| <b>Group - I</b>         |                        |                                                                                            |                                    |                                 |                                                                                       |                               |                                   |
| 1                        | Uttar Pradesh **       | 4770399                                                                                    | 4770399                            | 4770399                         | 16991000                                                                              | 16581748                      | 16581748                          |
| 2                        | Maharashtra            | 2347121                                                                                    | 2347121                            | 2347121                         | 12977232                                                                              | 12977232                      | 12977232                          |
| 3                        | Madhya Pradesh *       | 2313977                                                                                    | 2313977                            | 2313977                         | 8872377                                                                               | 8872377                       | 8872377                           |
| 4                        | Rajasthan *            | 2308013                                                                                    | 2308013                            | 2308013                         | 6886000                                                                               | 6886000                       | 6886000                           |
| <b>Group - II</b>        |                        |                                                                                            |                                    |                                 |                                                                                       |                               |                                   |
| 1                        | Karnataka *            | 1665765                                                                                    | 1665765                            | 1665765                         | 7832189                                                                               | 7832204                       | 7832204                           |
| 2                        | Gujarat *              | 1589236                                                                                    | 1589236                            | 1589236                         | 5108923                                                                               | 5108923                       | 5108923                           |
| 3                        | Andhra Pradesh         | 1348382                                                                                    | 1348382                            | 1348382                         | 7455204                                                                               | 7455204                       | 7455204                           |
| 4                        | Bihar *                | 1308778                                                                                    | 1308778                            | 1308778                         | 6469650                                                                               | 6469650                       | 6469650                           |
| 5                        | West Bengal *          | 1300349                                                                                    | 1300349                            | 1300349                         | 5040510                                                                               | 5040510                       | 4139000                           |
| 6                        | Tamil Nadu *           | 1274536                                                                                    | 1274536                            | 1274536                         | 7000000                                                                               | 7000000                       | 7000000                           |
| 7                        | Telangana              | 1034678                                                                                    | 1034678                            | 1034678                         | 5720737                                                                               | 5720737                       | 5720737                           |
| <b>Group - III</b>       |                        |                                                                                            |                                    |                                 |                                                                                       |                               |                                   |
| 1                        | Punjab *               | 835526                                                                                     | 835526                             | 482145                          | 1053000                                                                               | 937406                        | 900431                            |
| 2                        | Haryana *              | 788670                                                                                     | 788670                             | 788670                          | 4227238                                                                               | 4227238                       | 4227238                           |
| 3                        | Chhattisgarh           | 703691                                                                                     | 703691                             | 703691                          | 3890709                                                                               | 3890709                       | 3890709                           |
| 4                        | Odisha *               | 668635                                                                                     | 668635                             | 668635                          | 2374233                                                                               | 2374233                       | 2374233                           |
| <b>Group - IV</b>        |                        |                                                                                            |                                    |                                 |                                                                                       |                               |                                   |
| 1                        | Kerala                 | 127585                                                                                     | 127585                             | 127585                          | 705420                                                                                | 705420                        | 705420                            |
| 2                        | Goa *                  | 25000                                                                                      | 25000                              | 25000                           | 25000                                                                                 | 25000                         | 25000                             |
| 3                        | Uttarakhand            | 135738                                                                                     | 135738                             | 135738                          | 750494                                                                                | 750494                        | 750494                            |
| 4                        | Himachal Pradesh       | 69635                                                                                      | 69635                              | 69635                           | 385011                                                                                | 385011                        | 385011                            |
| 5                        | J & K *                | 160687                                                                                     | 160687                             | 160687                          | 692062                                                                                | 692062                        | 692062                            |
| 6                        | Jharkhand              | 115302                                                                                     | 115302                             | 115302                          | 637507                                                                                | 637507                        | 637507                            |
| 7                        | Arunachal Pradesh *    | 20532                                                                                      | 20532                              | 20532                           | 20532                                                                                 | 20532                         | 20532                             |
| 8                        | Assam                  | 278707                                                                                     | 278707                             | 278707                          | 1540968                                                                               | 675334                        | 230027                            |
| 9                        | Manipur                | 20713                                                                                      | 20713                              | 20713                           | 114522                                                                                | 114522                        | 114522                            |
| 10                       | Meghalaya *            | 39372                                                                                      | 39372                              | 39372                           | 209561                                                                                | 209561                        | 209561                            |
| 11                       | Mizoram                | 11986                                                                                      | 11986                              | 11986                           | 11986                                                                                 | 11986                         | 11986                             |
| 12                       | Nagaland               | 33423                                                                                      | 33423                              | 33423                           | 184797                                                                                | 184797                        | 184797                            |
| 13                       | Sikkim *               | 13217                                                                                      | 13217                              | 13217                           | 46000                                                                                 | 46000                         | 46000                             |
| 14                       | Tripura *              | 32736                                                                                      | 32736                              | 32736                           | 117723                                                                                | 117723                        | 117723                            |
| <b>Union Territories</b> |                        |                                                                                            |                                    |                                 |                                                                                       |                               |                                   |
| 1                        | Andaman & Nicobar *    | 1405                                                                                       | 1405                               | 1405                            | 10000                                                                                 | 10000                         | 10000                             |
| 2                        | Dadar Nagar & Haveli * | 2162                                                                                       | 2162                               | 2162                            | 2162                                                                                  | 2162                          | 2162                              |
| 3                        | Puducherry             | 3530                                                                                       | 3530                               | 3530                            | 19594                                                                                 | 19594                         | 19594                             |
| <b>Total</b>             |                        | <b>25349486</b>                                                                            | <b>25349486</b>                    | <b>24996105</b>                 | <b>107372341</b>                                                                      | <b>105981876</b>              | <b>104598084</b>                  |

\* As per changed targets by States

\*\* State that has revised target twice

Source: Department of Agriculture, Cooperation &amp; Farmers Welfare

**Table 8.6 (b): State-wise Status of Soil Health Card Scheme Cycle-II as on 20.02.2018**

| S.No.                    | States               | Target for Soil Samples Collection & Testing during Cycle-II (2017-18) | No. of Samples Collected (Cycle-II) | No. of Samples Tested (Cycle-II) | Target for Printing & Distribution of SHCs for Cycle-II (2017-18) | No. of SHCs Printed (Cycle-II) | No. of SHCs Distributed (Cycle-II) |
|--------------------------|----------------------|------------------------------------------------------------------------|-------------------------------------|----------------------------------|-------------------------------------------------------------------|--------------------------------|------------------------------------|
| (1)                      | (2)                  | (3)                                                                    | (4)                                 | (5)                              | (6)                                                               | (7)                            | (8)                                |
| <b>Group - I</b>         |                      |                                                                        |                                     |                                  |                                                                   |                                |                                    |
| 1                        | Uttar Pradesh **     | 2385200                                                                | 2108367                             | 1266927                          | 11662730                                                          | 1074766                        | 467817                             |
| 2                        | Maharashtra          | 1173561                                                                | 1495437                             | 1239632                          | 6488616                                                           | 2441389                        | 2079442                            |
| 3                        | Madhya Pradesh *     | 1156989                                                                | 1071969                             | 802130                           | 4436189                                                           | 2018400                        | 2017388                            |
| 4                        | Rajasthan *          | 1154007                                                                | 622000                              | 457000                           | 3443000                                                           | 1128000                        | 923000                             |
| <b>Group - II</b>        |                      |                                                                        |                                     |                                  |                                                                   |                                |                                    |
| 1                        | Karnataka *          | 832883                                                                 | 679767                              | 544713                           | 3916095                                                           | 1415867                        | 920802                             |
| 2                        | Gujarat *            | 794618                                                                 | 833561                              | 735828                           | 2554462                                                           | 0                              | 0                                  |
| 3                        | Andhra Pradesh       | 674191                                                                 | 449084                              | 283430                           | 3727602                                                           | 1011863                        | 1011863                            |
| 4                        | Bihar *              | 654389                                                                 | 569002                              | 282996                           | 3618117                                                           | 1036844                        | 925446                             |
| 5                        | West Bengal *        | 650175                                                                 | 331000                              | 190000                           | 2520255                                                           | 806000                         | 0                                  |
| 6                        | Tamil Nadu *         | 637268                                                                 | 652245                              | 595070                           | 3500000                                                           | 769587                         | 628941                             |
| 7                        | Telangana            | 517339                                                                 | 487627                              | 345943                           | 2860369                                                           | 425529                         | 100063                             |
| <b>Group - III</b>       |                      |                                                                        |                                     |                                  |                                                                   |                                |                                    |
| 1                        | Punjab *             | 417763                                                                 | 339907                              | 0                                | 2309811                                                           | 0                              | 0                                  |
| 2                        | Haryana *            | 394335                                                                 | 622550                              | 165740                           | 2180278                                                           | 47625                          | 26268                              |
| 3                        | Chhattisgarh         | 351846                                                                 | 468805                              | 416950                           | 1945355                                                           | 1447665                        | 1380566                            |
| 4                        | Odisha *             | 334318                                                                 | 232146                              | 176621                           | 1848441                                                           | 395193                         | 333640                             |
| <b>Group - IV</b>        |                      |                                                                        |                                     |                                  |                                                                   |                                |                                    |
| 1                        | Kerala               | 103392                                                                 | 0                                   | 0                                | 2852208                                                           | 0                              | 0                                  |
| 2                        | Goa *                | 12500                                                                  | 6757                                | 4453                             | 12500                                                             | 4223                           | 4223                               |
| 3                        | Uttarakhand          | 67869                                                                  | 67139                               | 63461                            | 375247                                                            | 217157                         | 198587                             |
| 4                        | Himachal Pradesh     | 50000                                                                  | 56939                               | 54558                            | 480383                                                            | 328743                         | 328743                             |
| 5                        | J & K *              | 82659                                                                  | 38361                               | 17175                            | 457022                                                            | 71281                          | 71281                              |
| 6                        | Jharkhand            | 57651                                                                  | 47386                               | 42390                            | 318754                                                            | 96367                          | 96367                              |
| 7                        | Arunachal Pradesh *  | 10266                                                                  | 0                                   | 0                                | 56762                                                             | 0                              | 0                                  |
| 8                        | Assam                | 139354                                                                 | 0                                   | 0                                | 770484                                                            | 0                              | 0                                  |
| 9                        | Manipur              | 10357                                                                  | 3542                                | 1465                             | 57261                                                             | 0                              | 0                                  |
| 10                       | Meghalaya *          | 19686                                                                  | 12972                               | 9755                             | 104781                                                            | 35904                          | 33519                              |
| 11                       | Mizoram              | 5993                                                                   | 227                                 | 127                              | 5993                                                              | 5                              | 5                                  |
| 12                       | Nagaland             | 16712                                                                  | 600                                 | 500                              | 92399                                                             | 0                              | 0                                  |
| 13                       | Sikkim *             | 6609                                                                   | 0                                   | 0                                | 23000                                                             | 0                              | 0                                  |
| 14                       | Tripura *            | 16368                                                                  | 11668                               | 7795                             | 58862                                                             | 12343                          | 12343                              |
| <b>Union Territories</b> |                      |                                                                        |                                     |                                  |                                                                   |                                |                                    |
| 1                        | Andaman & Nicobar *  | 703                                                                    | 570                                 | 333                              | 3900                                                              | 0                              | 0                                  |
|                          | Dadar Nagar & Haveli |                                                                        |                                     |                                  |                                                                   |                                |                                    |
| 2                        | *                    | 1081                                                                   | 0                                   | 0                                | 6000                                                              | 0                              | 0                                  |
| 3                        | Puducherry           | 1765                                                                   | 3223                                | 2053                             | 9797                                                              | 0                              | 0                                  |
| <b>Total</b>             |                      | <b>12731841</b>                                                        | <b>11212851</b>                     | <b>7707045</b>                   | <b>62696665</b>                                                   | <b>14784751</b>                | <b>11560304</b>                    |

\* As per changed targets by States \*\* State that has revised target twice

Source: Department of Agriculture, Cooperation &amp; Farmers Welfare

**Table 8.7: Consumption of Electricity for Agricultural Purposes**

| Year    | Consumption<br>for Agricultural<br>Purposes<br>(GWh) | Total<br>Consumption<br>(GWh) | % Share of<br>Agricultural<br>Consumption<br>to Total<br>Consumption<br>(4) |
|---------|------------------------------------------------------|-------------------------------|-----------------------------------------------------------------------------|
| (1)     | (2)                                                  | (3)                           | (4)                                                                         |
| 1982-83 | 17817                                                | 95589                         | 18.64                                                                       |
| 1985-86 | 23422                                                | 122999                        | 19.04                                                                       |
| 1990-91 | 50321                                                | 190357                        | 26.44                                                                       |
| 2000-01 | 84729                                                | 316600                        | 26.76                                                                       |
| 2009-10 | 119492                                               | 569618                        | 20.98                                                                       |
| 2010-11 | 126377                                               | 616969                        | 20.48                                                                       |
| 2011-12 | 140960                                               | 672933                        | 20.95                                                                       |
| 2012-13 | 147462                                               | 708843                        | 20.80                                                                       |
| 2013-14 | 152744                                               | 751908                        | 20.31                                                                       |
| 2014-15 | 168913                                               | 814250                        | 20.74                                                                       |
| 2015-16 | 173185                                               | 863364                        | 20.06                                                                       |

Source: Central Electricity Authority, Delhi

**Table 8.8: Year-wise Sales of Tractors and Power tillers**

| Year         | Tractor Sales (No.) | Power tiller Sales (No.) |
|--------------|---------------------|--------------------------|
| (1)          | (2)                 | (3)                      |
| 2004-05      | 247531              | 17481                    |
| 2005-06      | 296080              | 22303                    |
| 2006-07      | 352835              | 24791                    |
| 2007-08      | 346501              | 26135                    |
| 2008-09      | 342836              | 35294                    |
| 2009-10      | 393836              | 38794                    |
| 2010-11      | 545109              | 55100                    |
| 2011-12      | 535210              | 60000                    |
| 2012-13      | 590672              | 47000                    |
| 2013-14      | 696828              | 56000                    |
| 2014-15      | 551463              | 46000                    |
| 2015-16      | 571249              | 48882                    |
| 2016-17      | 582662              | 45200                    |
| <b>Total</b> | <b>6052812</b>      | <b>522980</b>            |

Source: Indian Council of Agricultural Research (ICAR)

**Table 8.9: Flow of Institutional Credit to Agriculture Sector**

(₹ in Crore)

| Particulars/Agency               | 2007-08       | 2008-09       | 2009-10       | 2010-11       | 2011-12       | 2012-13       | 2013-14*      | 2014-15*      | 2015-16*      | 2016-17*       |
|----------------------------------|---------------|---------------|---------------|---------------|---------------|---------------|---------------|---------------|---------------|----------------|
| (1)                              | (2)           | (3)           | (4)           | (5)           | (6)           | (7)           | (8)           | (9)           | (10)          | (11)           |
| <b>I. Production (ST) Credit</b> |               |               |               |               |               |               |               |               |               |                |
| Co-operative Banks               | 43294         | 40164         | 56946         | 69038         | 81829         | 102592        | 113574        | 130350        | 143803        | 131880         |
| RRBs                             | 21133         | 22413         | 29802         | 38121         | 47401         | 55957         | 70697         | 89326         | 101579        | 105001         |
| Commercial Banks                 | 116966        | 147818        | 189908        | 228391        | 266928        | 314951        | 364164        | 415736        | 419930        | 452576         |
| Other Agencies                   |               | 66            |               |               |               |               |               |               |               |                |
| <b>Sub Total (A)</b>             | <b>181393</b> | <b>210461</b> | <b>276656</b> | <b>335550</b> | <b>396158</b> | <b>473500</b> | <b>548435</b> | <b>635412</b> | <b>665312</b> | <b>689457</b>  |
| <b>II. MT/LT Credit</b>          |               |               |               |               |               |               |               |               |               |                |
| Co-operative Banks               | 4964          | 5802          | 6551          | 9083          | 6134          | 8611          | 6389          | 8119          | 9492          | 10878          |
| RRBs                             | 4179          | 4352          | 5415          | 6172          | 7049          | 7724          | 11956         | 13157         | 17681         | 18215          |
| Commercial Banks                 | 64122         | 81133         | 95892         | 117486        | 101688        | 117540        | 163342        | 188640        | 223024        | 347205         |
| Other Agencies                   |               | 160           |               |               |               |               |               |               |               |                |
| <b>Sub Total (B)</b>             | <b>73265</b>  | <b>91447</b>  | <b>107858</b> | <b>132741</b> | <b>114871</b> | <b>133875</b> | <b>181687</b> | <b>209916</b> | <b>250197</b> | <b>376298</b>  |
| <b>Total Credit (ST + MT/LT)</b> |               |               |               |               |               |               |               |               |               |                |
| Co-operative Banks               | 48258         | 45966         | 63497         | 78121         | 87963         | 111203        | 119963        | 138469        | 153295        | 142758         |
| RRBs                             | 25312         | 26765         | 35217         | 44293         | 54450         | 63681         | 82653         | 102483        | 119260        | 123216         |
| Commercial Banks                 | 181088        | 228951        | 285800        | 345877        | 368616        | 432491        | 527506        | 604376        | 642954        | 799781         |
| Other Agencies                   |               | 226           |               |               |               |               |               |               |               |                |
| <b>Grand Total (A+B)</b>         | <b>254658</b> | <b>301908</b> | <b>384514</b> | <b>468291</b> | <b>511029</b> | <b>607375</b> | <b>730122</b> | <b>845328</b> | <b>915509</b> | <b>1065755</b> |

\* Figures have been revised based on the updated information from the respective agencies.

ST: Short Term                      LT: Long Term                      MT: Medium Term

Source: Department of Agriculture, Cooperation & Farmers Welfare



**Table 8.10: State-wise Agriculture Loan disbursed in 2016-17**

|              |                      | (No. of accounts in thousands and Amount in ₹ crore) |                  |                              |                  |                              |                   |
|--------------|----------------------|------------------------------------------------------|------------------|------------------------------|------------------|------------------------------|-------------------|
| Sl. No       | State/ UT            | Crop Loan                                            |                  | Term Loan                    |                  | Total                        |                   |
|              |                      | Disbursement during the year                         |                  | Disbursement during the year |                  | Disbursement during the year |                   |
|              |                      | No. of Accounts                                      | Amount disbursed | No. of Accounts              | Amount disbursed | No. of Accounts              | Amount disbursed  |
| (1)          | (2)                  | (3)                                                  | (4)              | (5)                          | (6)              | (7)                          | (8)               |
| 1            | Andaman & Nicobar    | 3.11                                                 | 35.97            | 12.32                        | 99.01            | 15.43                        | 134.98            |
| 2            | Andhra Pradesh       | 8564.23                                              | 61391.48         | 1987.55                      | 31477.14         | 10551.78                     | 92868.62          |
| 3            | Arunachal Pradesh    | 4.04                                                 | 27.77            | 3.93                         | 104.81           | 7.97                         | 132.59            |
| 4            | Assam                | 389.93                                               | 1568.20          | 644.34                       | 4533.88          | 1034.27                      | 6102.07           |
| 5            | Bihar                | 2915.49                                              | 14218.62         | 1591.90                      | 11965.96         | 4507.38                      | 26184.58          |
| 6            | Chandigarh           | 3.97                                                 | 752.79           | 3.70                         | 653.16           | 7.67                         | 1405.95           |
| 7            | Chhattisgarh         | 1546.50                                              | 9363.50          | 149.58                       | 2873.92          | 1696.07                      | 12237.42          |
| 8            | Dadra & Nagar Haveli | 2.37                                                 | 27.13            | 2.48                         | 53.04            | 4.86                         | 80.17             |
| 9            | Daman & Diu          | 1.04                                                 | 12.79            | 1.07                         | 21.79            | 2.11                         | 34.58             |
| 10           | Delhi                | 49.64                                                | 8377.70          | 27.90                        | 11563.95         | 77.54                        | 19941.65          |
| 11           | Goa                  | 21.47                                                | 218.85           | 30.12                        | 792.43           | 51.58                        | 1011.28           |
| 12           | Gujarat              | 2950.02                                              | 33864.46         | 543.99                       | 20412.24         | 3494.01                      | 54276.70          |
| 13           | Haryana              | 2441.83                                              | 36274.86         | 254.53                       | 13206.21         | 2696.35                      | 49481.07          |
| 14           | Himachal Pradesh     | 568.63                                               | 4419.53          | 122.85                       | 1696.61          | 691.48                       | 6116.15           |
| 15           | Jammu & Kashmir      | 618.13                                               | 6702.30          | 28.23                        | 594.44           | 646.36                       | 7296.74           |
| 16           | Jharkhand            | 984.02                                               | 2821.40          | 162.74                       | 1558.59          | 1146.76                      | 4379.99           |
| 17           | Karnataka            | 5236.67                                              | 41677.18         | 1702.71                      | 36405.55         | 6939.38                      | 78082.72          |
| 18           | Kerala               | 5556.74                                              | 44415.65         | 880.63                       | 23323.12         | 6437.36                      | 67738.76          |
| 19           | Lakshadweep          | 0.09                                                 | 0.55             | 0.44                         | 2.72             | 0.53                         | 3.27              |
| 20           | Madhya Pradesh       | 6031.36                                              | 42909.85         | 679.27                       | 13239.22         | 6710.63                      | 56149.06          |
| 21           | Maharashtra          | 6131.94                                              | 41338.83         | 2054.08                      | 40045.01         | 8186.01                      | 81383.84          |
| 22           | Manipur              | 13.75                                                | 58.99            | 13.90                        | 192.13           | 27.66                        | 251.12            |
| 23           | Meghalaya            | 36.05                                                | 281.70           | 8.45                         | 86.61            | 44.50                        | 368.31            |
| 24           | Mizoram              | 7.25                                                 | 30.36            | 7.36                         | 84.00            | 14.62                        | 114.36            |
| 25           | Nagaland             | 21.30                                                | 72.90            | 4.03                         | 56.49            | 25.33                        | 129.39            |
| 26           | Odisha               | 4303.37                                              | 15811.64         | 541.19                       | 5453.32          | 4844.57                      | 21264.96          |
| 27           | Puducherry           | 455.87                                               | 3338.56          | 161.56                       | 1951.52          | 617.43                       | 5290.08           |
| 28           | Punjab               | 2475.41                                              | 58034.30         | 357.67                       | 16267.16         | 2833.08                      | 74301.47          |
| 29           | Rajasthan            | 6079.00                                              | 57875.53         | 578.72                       | 16428.32         | 6657.71                      | 74303.86          |
| 30           | Sikkim               | 5.03                                                 | 107.97           | 4.08                         | 53.72            | 9.11                         | 161.70            |
| 31           | Tamil Nadu           | 11380.28                                             | 79593.90         | 4248.45                      | 52550.67         | 15628.72                     | 132144.57         |
| 32           | Telangana            | 5030.37                                              | 47289.22         | 862.23                       | 20596.13         | 5892.59                      | 67885.35          |
| 33           | Tripura              | 86.81                                                | 335.08           | 220.23                       | 1178.05          | 307.03                       | 1513.13           |
| 34           | Uttarakhand          | 9011.92                                              | 59592.66         | 929.68                       | 21991.35         | 9941.60                      | 81584.01          |
| 35           | Uttar Pradesh        | 431.86                                               | 3671.18          | 97.72                        | 2834.26          | 529.58                       | 6505.43           |
| 36           | West Bengal          | 2700.53                                              | 12943.91         | 2088.81                      | 21951.82         | 4789.34                      | 34895.72          |
| <b>Total</b> |                      | <b>86059.98</b>                                      | <b>689457.32</b> | <b>21008.41</b>              | <b>376298.35</b> | <b>107068.39</b>             | <b>1065755.67</b> |

Source: Department of Agriculture, Cooperation & Farmers Welfare

**Table: 8.11 State-wise and Agency-wise KCCs - Cumulative cards issued and amount Outstanding (as on 31 March 2017)**

(Amount in Rs crore and Number in lakh)

| S. No. | State/UT             | Commercial Banks                        |                    | Cooperative Banks                       |                    | RRBs                                    |                    | Total                                   |                    |
|--------|----------------------|-----------------------------------------|--------------------|-----------------------------------------|--------------------|-----------------------------------------|--------------------|-----------------------------------------|--------------------|
|        |                      | Cumulative cards issued since inception | Amount outstanding | Cumulative cards issued since inception | Amount outstanding | Cumulative cards issued since inception | Amount outstanding | Cumulative cards issued since inception | Amount outstanding |
| (1)    | (2)                  | (3)                                     | (4)                | (5)                                     | (6)                | (7)                                     | (8)                | (9)                                     | (10)               |
| 1      | A & N Islands        | 0.05                                    | 2.83               | 0.09                                    | 11.93              | 0.00                                    | 0.00               | 0.14                                    | 14.76              |
| 2      | Andhra Pradesh       | 130.23                                  | 21295.41           | 23.55                                   | 6862.49            | 17.23                                   | 6574.02            | 171.01                                  | 34731.92           |
| 3      | Arunachal Pradesh    | 0.39                                    | 54.68              | 0.01                                    | 1.97               | 0.07                                    | 13.21              | 0.47                                    | 69.86              |
| 4      | Assam                | 10.77                                   | 2746.55            | 0.04                                    | 11.60              | 6.49                                    | 988.56             | 17.30                                   | 3746.71            |
| 5      | Bihar                | 42.18                                   | 10068.21           | 2.04                                    | 316.40             | 37.43                                   | 8436.18            | 81.64                                   | 18820.79           |
| 6      | Chandigarh           | 0.09                                    | 494.27             |                                         |                    |                                         |                    | 0.09                                    | 494.27             |
| 7      | Chhattisgarh         | 6.06                                    | 3759.53            | 21.71                                   | 1163.95            | 3.99                                    | 1020.56            | 31.77                                   | 5944.04            |
| 8      | Dadra & Nagar Haveli | 0.02                                    | 7.61               |                                         |                    |                                         |                    | 0.02                                    | 7.61               |
| 9      | Daman & Diu          | 0.01                                    | 3.79               |                                         |                    |                                         |                    | 0.01                                    | 3.79               |
| 10     | Delhi                | 0.37                                    | 118.80             | 0.01                                    | 10.45              | 0.00                                    | 0.00               | 0.38                                    | 129.25             |
| 11     | Goa                  | 0.22                                    | 125.03             | 0.04                                    | 16.40              | 0.00                                    |                    | 0.25                                    | 141.43             |
| 12     | Gujarat              | 25.29                                   | 22591.34           | 21.23                                   | 7818.47            | 6.37                                    | 3596.61            | 52.89                                   | 34006.42           |
| 13     | Haryana              | 19.97                                   | 24964.53           | 18.50                                   | 8707.42            | 5.05                                    | 3458.94            | 43.53                                   | 37130.89           |
| 14     | Himachal Pradesh     | 4.54                                    | 3294.15            | 1.33                                    | 1191.25            | 0.87                                    | 461.53             | 6.73                                    | 4946.93            |
| 15     | Jammu & Kashmir      | 4.97                                    | 3423.42            | 0.15                                    | 36.66              | 1.39                                    | 534.32             | 6.51                                    | 3994.40            |
| 16     | Jharkhand            | 17.01                                   | 2431.82            | 0.39                                    | 34.98              | 8.10                                    | 1231.98            | 25.50                                   | 3698.78            |
| 17     | Karnataka            | 52.17                                   | 20504.67           | 37.41                                   | 10734.27           | 16.57                                   | 8534.74            | 106.15                                  | 39773.68           |
| 18     | Kerala               | 25.02                                   | 8570.96            | 12.21                                   | 2830.58            | 3.38                                    | 1203.59            | 40.61                                   | 12605.13           |
| 19     | Lakshadweep          | 0.03                                    | 2.44               |                                         |                    |                                         |                    | 0.03                                    | 2.44               |
| 20     | Madhya Pradesh       | 37.41                                   | 31834.71           | 81.07                                   | 12196.24           | 11.54                                   | 6369.00            | 130.02                                  | 50399.95           |
| 21     | Maharashtra          | 74.77                                   | 30821.13           | 63.09                                   | 18150.22           | 8.07                                    | 3378.52            | 145.92                                  | 52349.87           |
| 22     | Manipur              | 0.41                                    | 103.37             | 0.00                                    | 0.03               | 0.17                                    | 22.20              | 0.58                                    | 125.60             |
| 23     | Meghalaya            | 1.39                                    | 301.75             | 0.24                                    | 31.66              | 0.44                                    | 88.27              | 2.07                                    | 421.68             |
| 24     | Mizoram              | 0.37                                    | 83.24              | 0.01                                    | 0.00               | 0.15                                    | 91.28              | 0.53                                    | 174.52             |
| 25     | Nagaland             | 0.86                                    | 158.88             | 0.06                                    | 13.56              | 0.02                                    | 1.70               | 0.95                                    | 174.14             |
| 26     | Odisha               | 27.25                                   | 3380.06            | 53.07                                   | 7767.97            | 13.37                                   | 2310.37            | 93.69                                   | 13458.40           |
| 27     | Puducherry           | 1.39                                    | 472.73             | 0.09                                    | 3.33               | 0.03                                    | 10.03              | 1.51                                    | 486.09             |
| 28     | Punjab               | 27.98                                   | 46685.33           | 14.82                                   | 7231.79            | 2.92                                    | 3872.69            | 45.72                                   | 57789.81           |
| 29     | Rajasthan            | 47.73                                   | 46145.56           | 51.44                                   | 9787.59            | 13.14                                   | 10979.21           | 112.31                                  | 66912.36           |
| 30     | Sikkim               | 0.27                                    | 28.53              | 0.12                                    | 10.00              | 0.00                                    |                    | 0.39                                    | 38.52              |
| 31     | Tamil nadu           | 72.41                                   | 9508.38            | 19.66                                   | 4230.63            | 6.80                                    | 1822.88            | 98.88                                   | 15561.89           |
| 32     | Telangana            | 77.24                                   | 17335.55           | 15.26                                   | 2703.82            | 26.55                                   | 6888.07            | 119.06                                  | 26927.44           |
| 33     | Tripura              | 3.70                                    | 235.28             | 1.10                                    | 55.76              | 2.41                                    | 150.51             | 7.21                                    | 441.55             |
| 34     | Uttarakhand          | 13.90                                   | 6223.74            | 5.25                                    | 964.63             | 1.09                                    | 302.50             | 20.25                                   | 7490.87            |
| 35     | Uttar Pradesh        | 142.15                                  | 61096.56           | 66.47                                   | 5827.83            | 70.39                                   | 27716.17           | 279.02                                  | 94640.56           |
| 36     | West Bengal          | 52.26                                   | 4664.32            | 27.87                                   | 3479.58            | 11.47                                   | 2359.10            | 91.60                                   | 10503.00           |
|        | <b>Total</b>         | <b>920.89</b>                           | <b>383539.16</b>   | <b>538.36</b>                           | <b>112203.46</b>   | <b>275.49</b>                           | <b>102416.74</b>   | <b>1734.73</b>                          | <b>598159.36</b>   |

Source: Department of Agriculture, Cooperation &amp; Farmers Welfare

**Table: 8.12: State-wise coverage under Pradhan Mantri Fasal Bima Yojana (PMFBY) - Cumulative upto Rabi 2016-17**

| (₹ in lakh)  |                           |                        |                       |                 |                  |                     |                     |                |                 |                |                           |
|--------------|---------------------------|------------------------|-----------------------|-----------------|------------------|---------------------|---------------------|----------------|-----------------|----------------|---------------------------|
| S.No.        | State / UT                | No. of Farmers covered | Area Insured (In Ha ) | Sum Insured     | Farmers' Premium | Gol Premium (Share) | State Govt. Premium | Gross Premium  | Claims Reported | Claims Paid    | No. of Farmers Benefitted |
| (1)          | (2)                       | (3)                    | (4)                   | (5)             | (6)              | (7)                 | (8)                 | (9)            | (10)            | (11)           | (12)                      |
| 1            | Andhra Pradesh            | 1005181                | 785883.28             | 547931.27       | 12443.30         | 19637.87            | 19637.87            | 51719.05       | 33011.12        | 29249.20       | 125476.00                 |
| 2            | Andaman & Nicobar Islands | 324                    | 253.20                | 46.84           | 0.23             | 0.46                | 0.93                | 1.62           | 14.56           | 14.56          | 295.00                    |
| 3            | Arunachal Pradesh         | 0                      | 0.00                  | 0.00            | 0.00             | 0.00                | 0.00                | 0.00           | 0.00            | 0.00           | 0.00                      |
| 4            | Assam                     | 8516                   | 4312.95               | 3011.99         | 86.28            | 43.47               | 43.47               | 173.22         | 0.00            | 0.00           | 0.00                      |
| 5            | Bihar                     | 2713178                | 2465249.21            | 1172428.36      | 20391.73         | 60850.73            | 60850.73            | 142093.19      | 32717.98        | 13015.92       | 149698.00                 |
| 6            | Chhatisgarh               | 1542449                | 2414598.31            | 721301.74       | 13554.96         | 9260.35             | 9260.35             | 32075.67       | 15597.73        | 15587.40       | 142088.00                 |
| 7            | Dadra & Nagar Haveli      | 0                      | 0.00                  | 0.00            | 0.00             | 0.00                | 0.00                | 0.00           | 0.00            | 0.00           | 0.00                      |
| 8            | Daman & Diu               | 0                      | 0.00                  | 0.00            | 0.00             | 0.00                | 0.00                | 0.00           | 0.00            | 0.00           | 0.00                      |
| 9            | Goa                       | 757                    | 547.81                | 579.83          | 6.77             | 0.33                | 0.33                | 7.42           | 2.68            | 2.68           | 111.00                    |
| 10           | Gujarat                   | 1975139                | 2841567.15            | 1232347.92      | 24939.21         | 98789.79            | 112341.58           | 236070.58      | 126193.89       | 121733.24      | 678766.00                 |
| 11           | Haryana                   | 1336028                | 2084575.90            | 1178213.12      | 19652.59         | 6486.39             | 10202.49            | 36341.46       | 29482.05        | 29007.87       | 216907.00                 |
| 12           | Himachal Pradesh          | 260565                 | 85416.19              | 37135.81        | 483.05           | 530.64              | 530.64              | 1544.34        | 569.86          | 569.86         | 23050.00                  |
| 13           | Jammu & Kashmir           | 0                      | 0.00                  | 0.00            | 0.00             | 0.00                | 0.00                | 0.00           | 0.00            | 0.00           | 0.00                      |
| 14           | Jharkhand                 | 877754                 | 373764.29             | 200043.32       | 3963.05          | 11589.03            | 11589.03            | 27141.12       | 2726.52         | 2043.47        | 46008.00                  |
| 15           | Karnataka                 | 2611964                | 2861980.68            | 985944.20       | 21267.15         | 59626.45            | 59626.45            | 140520.04      | 127254.37       | 98913.49       | 718326.00                 |
| 16           | Kerala                    | 18415                  | 12961.11              | 12827.61        | 262.22           | 111.74              | 111.74              | 485.70         | 343.11          | 0.00           | 2288.00                   |
| 17           | Lakshadweep               | 0                      | 0.00                  | 0.00            | 0.00             | 0.00                | 0.00                | 0.00           | 0.00            | 0.00           | 0.00                      |
| 18           | Madhya Pradesh            | 6667721                | 12457496.77           | 3633475.41      | 66337.67         | 161501.99           | 161501.99           | 389341.65      | 178525.66       | 173146.14      | 960521.00                 |
| 19           | Maharashtra               | 11793372               | 7227810.17            | 2233694.84      | 58429.40         | 168897.21           | 168897.21           | 396223.82      | 191800.33       | 191800.33      | 2781403.00                |
| 20           | Manipur                   | 8366                   | 9120.89               | 3693.96         | 73.88            | 142.69              | 142.69              | 359.26         | 195.91          | 127.24         | 8358.00                   |
| 21           | Meghalaya                 | 89                     | 37.71                 | 47.13           | 1.34             | 1.36                | 1.36                | 4.06           | 2.62            | 0.00           | 48.00                     |
| 22           | Mizoram                   | 0                      | 0.00                  | 0.00            | 0.00             | 0.00                | 0.00                | 0.00           | 0.00            | 0.00           | 0.00                      |
| 23           | Nagaland                  | 0                      | 0.00                  | 0.00            | 0.00             | 0.00                | 0.00                | 0.00           | 0.00            | 0.00           | 0.00                      |
| 24           | Orissa                    | 1820236                | 1318711.78            | 726234.75       | 14262.52         | 19822.72            | 19822.74            | 53907.97       | 43135.18        | 43127.63       | 168490.00                 |
| 25           | Puducherry                | 8537                   | 7978.62               | 3398.78         | 26.33            | 129.14              | 154.30              | 309.77         | 757.21          | 757.21         | 4299.00                   |
| 26           | Punjab                    | 0                      | 0.00                  | 0.00            | 0.00             | 0.00                | 0.00                | 0.00           | 0.00            | 0.00           | 0.00                      |
| 27           | Rajasthan                 | 8983491                | 10137879.63           | 1686084.44      | 35489.08         | 105329.08           | 105329.08           | 246147.24      | 175776.96       | 170849.62      | 2651299.00                |
| 28           | Sikkim                    | 574                    | 130.50                | 45.93           | 0.74             | 0.14                | 0.14                | 1.02           | 10.77           | 10.06          | 225.00                    |
| 29           | Tamil Nadu                | 1449133                | 1322585.20            | 689549.74       | 29658.72         | 46995.06            | 47038.10            | 123734.93      | 327111.87       | 313064.14      | 1037390.00                |
| 30           | Telengana                 | 887013                 | 733621.29             | 463416.28       | 8559.84          | 7204.77             | 7204.77             | 22969.39       | 11712.64        | 11133.29       | 134278.00                 |
| 31           | Tripura                   | 12528                  | 4916.54               | 2957.70         | 28.52            | 5.19                | 5.19                | 38.89          | 11.40           | 11.40          | 542.00                    |
| 32           | Uttar Pradesh             | 6751422                | 5819591.51            | 2542192.07      | 46427.94         | 29821.49            | 29821.49            | 106070.93      | 53191.36        | 53127.61       | 1107682.00                |
| 33           | Uttarakhand               | 208175                 | 107229.41             | 69722.53        | 840.86           | 184.22              | 184.22              | 1209.30        | 376.90          | 376.59         | 18135.00                  |
| 34           | West Bengal               | 4130164                | 2023047.46            | 1226977.48      | 23295.05         | 23873.67            | 25407.37            | 72576.10       | 37060.66        | 30589.22       | 513840.00                 |
| <b>Total</b> |                           | <b>55071091</b>        | <b>55101268</b>       | <b>19373303</b> | <b>400482</b>    | <b>830836</b>       | <b>849706</b>       | <b>2081068</b> | <b>1387583</b>  | <b>1298258</b> | <b>11489523</b>           |

Source : Department of Agriculture, Cooperation & Farmers Welfare

**Table: 8.13: State-wise coverage under Restructured Weather Based Crop Insurance Scheme (RWBCIS)- Cumulative upto Rabi 2016-17**

|              |                           |                        |                       |                   |                  |                     |                     |                  |                  |                  | (₹ in lakh)               |
|--------------|---------------------------|------------------------|-----------------------|-------------------|------------------|---------------------|---------------------|------------------|------------------|------------------|---------------------------|
| S.No.        | State / UT                | No. of Farmers covered | Area Insured (In Ha ) | Sum Insured       | Farmers' Premium | Gol Premium (Share) | State Govt. Premium | Gross Premium    | Claims Reported  | Claims Paid      | No. of Farmers Benefitted |
| (1)          | (2)                       | (3)                    | (4)                   | (5)               | (6)              | (7)                 | (8)                 | (9)              | (10)             | (11)             | (12)                      |
| 1            | Andhra Pradesh            | 766454                 | 766660.41             | 312978.41         | 7453.17          | 10049.42            | 10049.45            | 27552.04         | 57038.00         | 56952.76         | 758244                    |
| 2            | Andaman & Nicobar Islands | 0                      | 0.00                  | 0.00              | 0.00             | 0.00                | 0.00                | 0.00             | 0.00             | 0.00             | 0                         |
| 3            | Arunachal Pradesh         | 0                      | 0.00                  | 0.00              | 0.00             | 0.00                | 0.00                | 0.00             | 0.00             | 0.00             | 0                         |
| 4            | Assam                     | 51749                  | 36692.13              | 20547.43          | 410.96           | 140.24              | 140.24              | 691.45           | 501.68           | 501.68           | 23370                     |
| 5            | Bihar                     | 0                      | 0.00                  | 0.00              | 0.00             | 0.00                | 0.00                | 0.00             | 0.00             | 0.00             | 0                         |
| 6            | Chhatisgarh               | 6701                   | 2170.48               | 1889.43           | 94.47            | 203.48              | 203.48              | 501.43           | 135.90           | 130.76           | 1106                      |
| 7            | Dadra & Nagar Haveli      | 0                      | 0.00                  | 0.00              | 0.00             | 0.00                | 0.00                | 0.00             | 0.00             | 0.00             | 0                         |
| 8            | Daman & Diu               | 0                      | 0.00                  | 0.00              | 0.00             | 0.00                | 0.00                | 0.00             | 0.00             | 0.00             | 0                         |
| 9            | Goa                       | 0                      | 0.00                  | 0.00              | 0.00             | 0.00                | 0.00                | 0.00             | 0.00             | 0.00             | 0                         |
| 10           | Gujarat                   | 0                      | 0.00                  | 0.00              | 0.00             | 0.00                | 0.00                | 0.00             | 0.00             | 0.00             | 0                         |
| 11           | Haryana                   | 0                      | 0.00                  | 0.00              | 0.00             | 0.00                | 0.00                | 0.00             | 0.00             | 0.00             | 0                         |
| 12           | Himachal Pradesh          | 119360                 | 44015.25              | 52758.04          | 2626.95          | 1496.03             | 1496.03             | 5619.01          | 3841.48          | 3796.54          | 90083                     |
| 13           | Jammu & Kashmir           | 0                      | 0.00                  | 0.00              | 0.00             | 0.00                | 0.00                | 0.00             | 0.00             | 0.00             | 0                         |
| 14           | Jharkhand                 | 0                      | 0.00                  | 0.00              | 0.00             | 0.00                | 0.00                | 0.00             | 0.00             | 0.00             | 0                         |
| 15           | Karnataka                 | 132026                 | 100650.26             | 94288.41          | 4714.39          | 4879.33             | 4879.33             | 14473.05         | 28092.85         | 26810.44         | 148290                    |
| 16           | Kerala                    | 58990                  | 40143.94              | 20420.07          | 459.64           | 1185.79             | 1185.79             | 2831.22          | 1792.23          | 1787.08          | 24895                     |
| 17           | Lakshadweep               | 0                      | 0.00                  | 0.00              | 0.00             | 0.00                | 0.00                | 0.00             | 0.00             | 0.00             | 0                         |
| 18           | Madhya Pradesh            | 513595                 | 328852.73             | 223891.21         | 10838.09         | 5668.04             | 5669.19             | 22175.33         | 18603.91         | 18603.91         | 341692                    |
| 19           | Maharashtra               | 207843                 | 210735.63             | 216144.26         | 10807.22         | 33445.68            | 33445.68            | 77698.57         | 38768.89         | 38170.52         | 123167                    |
| 20           | Manipur                   | 0                      | 0.00                  | 0.00              | 0.00             | 0.00                | 0.00                | 0.00             | 0.00             | 0.00             | 0                         |
| 21           | Meghalaya                 | 0                      | 0.00                  | 0.00              | 0.00             | 0.00                | 0.00                | 0.00             | 0.00             | 0.00             | 0                         |
| 22           | Mizoram                   | 0                      | 0.00                  | 0.00              | 0.00             | 0.00                | 0.00                | 0.00             | 0.00             | 0.00             | 0                         |
| 23           | Nagaland                  | 0                      | 0.00                  | 0.00              | 0.00             | 0.00                | 0.00                | 0.00             | 0.00             | 0.00             | 0                         |
| 24           | Orissa                    | 0                      | 0.00                  | 0.00              | 0.00             | 0.00                | 0.00                | 0.00             | 0.00             | 0.00             | 0                         |
| 25           | Puducherry                | 0                      | 0.00                  | 0.00              | 0.00             | 0.00                | 0.00                | 0.00             | 0.00             | 0.00             | 0                         |
| 26           | Punjab                    | 0                      | 0.00                  | 0.00              | 0.00             | 0.00                | 0.00                | 0.00             | 0.00             | 0.00             | 0                         |
| 27           | Rajasthan                 | 44150                  | 34958.80              | 11572.19          | 436.04           | 2267.29             | 2267.29             | 4970.62          | 5148.14          | 5148.14          | 42728                     |
| 28           | Sikkim                    | 0                      | 0.00                  | 0.00              | 0.00             | 0.00                | 0.00                | 0.00             | 0.00             | 0.00             | 0                         |
| 29           | Tamil Nadu                | 0                      | 0.00                  | 0.00              | 0.00             | 0.00                | 0.00                | 0.00             | 0.00             | 0.00             | 0                         |
| 30           | Telangana                 | 88772                  | 98174.53              | 56294.06          | 2814.71          | 1822.93             | 1822.93             | 6460.57          | 6066.73          | 6066.16          | 83578                     |
| 31           | Tripura                   | 0                      | 0.00                  | 0.00              | 0.00             | 0.00                | 0.00                | 0.00             | 0.00             | 0.00             | 0                         |
| 32           | Uttar Pradesh             | 6250                   | 2814.20               | 2751.80           | 137.59           | 178.87              | 178.87              | 495.32           | 351.14           | 345.40           | 6250                      |
| 33           | Uttarakhand               | 53396                  | 25133.29              | 22416.96          | 1115.21          | 917.01              | 917.01              | 2949.22          | 2370.16          | 2370.16          | 43570                     |
| 34           | West Bengal               | 1713                   | 146.37                | 357.50            | 17.88            | 5.44                | 5.44                | 28.76            | 0.17             | 0.17             | 13                        |
| <b>Total</b> |                           | <b>2050999.00</b>      | <b>1691148.01</b>     | <b>1036309.78</b> | <b>41926.30</b>  | <b>62259.56</b>     | <b>62260.73</b>     | <b>166446.60</b> | <b>162711.30</b> | <b>160683.71</b> | <b>1686986.00</b>         |

Source: Department of Agriculture, Cooperation & Farmers Welfare

**Table 8.14: Crop-wise Area Insured under all Insurance Schemes**

(Area in Lakh Hect.)

| S.No.                       | Crops         | 2014-15         |               |                   | 2015-16          |               |                   | 2016-17          |               |                   |
|-----------------------------|---------------|-----------------|---------------|-------------------|------------------|---------------|-------------------|------------------|---------------|-------------------|
|                             |               | Gross Area Sown | Area Insured  | % of Area Insured | Gross Area Sown* | Area Insured  | % of Area Insured | Gross Area Sown* | Area Insured  | % of Area Insured |
| (1)                         | (2)           | (3)             | (4)           | (5)               | (6)              | (7)           | (8)               | (9)              | (10)          | (11)              |
| 1                           | Paddy         | 442.38          | 96.50         | 21.81             | 442.38           | 114.93        | 25.98             | 442.38           | 130.29        | 29.45             |
| 2                           | Wheat         | 320.78          | 78.83         | 24.57             | 320.78           | 87.82         | 27.38             | 320.78           | 100.57        | 31.35             |
| 3                           | Nutri Cereals | 255.01          | 50.35         | 19.75             | 255.01           | 59.61         | 23.38             | 255.01           | 54.32         | 21.30             |
| 4                           | Sugarcane     | 55.65           | 1.46          | 2.62              | 55.65            | 2.29          | 4.11              | 55.65            | 2.86          | 5.13              |
| 5                           | Cotton        | 126.60          | 15.32         | 12.10             | 126.60           | 14.49         | 11.44             | 126.60           | 35.82         | 28.29             |
| 6                           | Jute & Mesta  | 8.19            | 0.69          | 8.46              | 8.19             | 0.04          | 0.43              | 8.19             | 0.73          | 8.91              |
| 7                           | Oilseeds      | 284.24          | 101.41        | 35.68             | 284.24           | 132.51        | 46.62             | 284.24           | 84.24         | 29.64             |
| 8                           | Pulses        | 217.07          | 65.35         | 30.10             | 217.07           | 71.19         | 32.80             | 217.07           | 58.89         | 27.13             |
| 9                           | Vegetables    | 57.87           | 21.05         | 36.38             | 57.87            | 20.54         | 35.49             | 57.87            | 7.13          | 12.32             |
| 10                          | Fruits**      | 41.92           | 2.27          | 5.41              | 41.92            | 3.97          | 9.47              | 41.92            | 3.51          | 8.37              |
| 11                          | Others        | 173.89          | 8.17          | 4.70              | 173.89           | 16.48         | 9.48              | 173.89           | 89.58         | 51.52             |
| <b>Area under all Crops</b> |               | <b>1983.60</b>  | <b>441.41</b> | <b>22.25</b>      | <b>1983.60</b>   | <b>523.86</b> | <b>26.41</b>      | <b>1983.60</b>   | <b>567.92</b> | <b>28.63</b>      |

\* Latest data for Gross area sown is available till 2014-15 only

Source: Department of Agriculture, Cooperation &amp; Farmers Welfare.

**Table 8.15: State-wise Crop Area Insured under all Insurance Schemes**

(Area in Lakh Hect.)

| State/UT               | 2014-15         |               |                   | 2015-16          |               |                   | 2016-17          |               |                   |
|------------------------|-----------------|---------------|-------------------|------------------|---------------|-------------------|------------------|---------------|-------------------|
|                        | Gross Area Sown | Area insured  | % of Area Insured | Gross Area Sown* | Area insured  | % of Area Insured | Gross Area Sown* | Area insured  | % of Area Insured |
| (1)                    | (2)             | (3)           | (4)               | (5)              | (6)           | (7)               | (8)              | (9)           | (10)              |
| Andhra Pradesh         | 76.90           | 5.41          | 7.04              | 76.90            | 23.12         | 30.07             | 76.90            | 15.53         | 20.19             |
| Andaman & Nicobar      | 0.24            | 0.01          | 5.13              | 0.24             | 0.01          | 5.75              | 0.24             | 0.00          | 1.06              |
| Arunachal Pradesh      | 2.99            | 0.00          | 0.00              | 2.99             | 0.00          | 0.00              | 2.99             | 0.00          | 0.00              |
| Assam                  | 40.83           | 0.30          | 0.74              | 40.83            | 0.29          | 0.70              | 40.83            | 0.41          | 1.00              |
| Bihar                  | 76.73           | 37.33         | 48.65             | 76.73            | 28.06         | 36.57             | 76.73            | 24.65         | 32.13             |
| Chandigarh             | 0.02            | 0.00          | 0.00              | 0.02             | 0.00          | 0.00              | 0.02             | 0.00          | 0.00              |
| Chhattisgarh           | 57.28           | 2.06          | 3.59              | 57.28            | 23.43         | 40.90             | 57.28            | 24.17         | 42.19             |
| Dadar & Nagar Haveli   | 0.23            | 0.00          | 0.00              | 0.23             | 0.00          | 0.00              | 0.23             | 0.00          | 0.00              |
| Daman & Diu            | 0.03            | 0.00          | 0.00              | 0.03             | 0.00          | 0.00              | 0.03             | 0.00          | 0.00              |
| Delhi                  | 0.35            | 0.00          | 0.00              | 0.35             | 0.00          | 0.00              | 0.35             | 0.00          | 0.00              |
| Goa                    | 1.58            | 0.00          | 0.11              | 1.58             | 0.00          | 0.07              | 1.58             | 0.01          | 0.35              |
| Gujarat                | 127.73          | 13.89         | 10.87             | 127.73           | 10.31         | 8.08              | 127.73           | 28.42         | 22.25             |
| Haryana                | 65.36           | 0.00          | 0.00              | 65.36            | 0.00          | 0.00              | 65.36            | 20.85         | 31.89             |
| Himachal Pradesh       | 9.18            | 0.54          | 5.83              | 9.18             | 0.54          | 5.89              | 9.18             | 1.29          | 14.10             |
| Jammu & Kashmir        | 11.78           | 0.01          | 0.07              | 11.78            | 0.00          | 0.00              | 11.78            | 0.00          | 0.00              |
| Jharkhand              | 15.54           | 2.50          | 16.08             | 15.54            | 4.17          | 26.83             | 15.54            | 3.74          | 24.05             |
| Karnataka              | 122.47          | 14.07         | 11.49             | 122.47           | 17.18         | 14.03             | 122.47           | 29.63         | 24.19             |
| Kerala                 | 26.25           | 0.48          | 1.85              | 26.25            | 0.65          | 2.46              | 26.25            | 0.53          | 2.02              |
| Lakshdweep             | 0.03            | 0.00          | 0.00              | 0.03             | 0.00          | 0.00              | 0.03             | 0.00          | 0.00              |
| Madhya Pradesh         | 238.10          | 108.03        | 45.37             | 238.10           | 121.08        | 50.85             | 238.10           | 127.86        | 53.70             |
| Maharashtra            | 234.74          | 48.63         | 20.72             | 234.74           | 83.00         | 35.36             | 234.74           | 74.39         | 31.69             |
| Manipur                | 3.83            | 0.06          | 1.70              | 3.83             | 0.17          | 4.39              | 3.83             | 0.09          | 2.38              |
| Meghalaya              | 3.43            | 0.01          | 0.41              | 3.43             | 0.01          | 0.29              | 3.43             | 0.00          | 0.01              |
| Mizoram                | 1.45            | 0.00          | 0.00              | 1.45             | 0.00          | 0.00              | 1.45             | 0.00          | 0.00              |
| Nagaland               | 5.00            | 0.00          | 0.00              | 5.00             | 0.00          | 0.00              | 5.00             | 0.00          | 0.00              |
| Odisha                 | 51.73           | 0.00          | 0.00              | 51.73            | 0.00          | 0.00              | 51.73            | 13.19         | 25.49             |
| Puducherry             | 0.27            | 0.00          | 0.00              | 0.27             | 0.00          | 0.00              | 0.27             | 0.08          | 29.55             |
| Punjab                 | 78.57           | 0.00          | 0.00              | 78.57            | 0.00          | 0.00              | 78.57            | 0.00          | 0.00              |
| Rajasthan              | 242.35          | 119.78        | 49.42             | 242.35           | 114.55        | 47.27             | 242.35           | 101.73        | 41.98             |
| Sikkim                 | 1.36            | 0.00          | 0.01              | 1.36             | 0.00          | 0.08              | 1.36             | 0.00          | 0.10              |
| Tamil Nadu             | 59.95           | 8.69          | 14.49             | 59.95            | 12.45         | 20.77             | 59.95            | 13.23         | 22.06             |
| Telangana              | 53.15           | 0.00          | -                 | 53.15            | 0.00          | 0.00              | 53.15            | 8.32          | 15.65             |
| Tripura                | 4.83            | 0.00          | 0.09              | 4.83             | 0.01          | 0.21              | 4.83             | 0.05          | 1.02              |
| Uttar Pradesh          | 261.47          | 20.43         | 7.81              | 261.47           | 37.98         | 14.53             | 261.47           | 58.22         | 22.27             |
| Uttarakhand            | 10.97           | 0.51          | 4.67              | 10.97            | 1.11          | 10.12             | 10.97            | 1.32          | 12.07             |
| West Bengal            | 96.90           | 9.97          | 10.29             | 96.90            | 8.73          | 9.01              | 96.90            | 20.23         | 20.88             |
| <b>All India Total</b> | <b>1983.60</b>  | <b>392.72</b> | <b>19.80</b>      | <b>1983.60</b>   | <b>486.86</b> | <b>24.54</b>      | <b>1983.60</b>   | <b>567.92</b> | <b>28.63</b>      |

\* Latest data for Gross area sown is available till 2014-15 only

Source: Department of Agriculture, Cooperation & Farmers Welfare

**Table 8.16: State-wise Area covered under Micro Irrigation as on 31.03.2017**

|              |                   |                |                | (Hectares)     |
|--------------|-------------------|----------------|----------------|----------------|
| S.No.        | Name of State     | Drip           | Sprinkler      | Total          |
| (1)          | (2)               | (3)            | (4)            | (5)            |
| 1            | Andhra Pradesh    | 1012093        | 386415         | 1398508        |
| 2            | Arunachal Pradesh | 613            | 0              | 613            |
| 3            | Assam             | 310            | 129            | 439            |
| 4            | Bihar             | 10309          | 101124         | 111433         |
| 5            | Chattisgarh       | 20399          | 263857         | 284256         |
| 6            | Goa               | 1086           | 993            | 2079           |
| 7            | Gujarat           | 557606         | 580396         | 1138002        |
| 8            | Haryana           | 28081          | 556079         | 584160         |
| 9            | Himachal Pradesh  | 4441           | 3652           | 8093           |
| 10           | Jammu & Kashmir   | 23             | 57             | 80             |
| 11           | Jharkhand         | 16641          | 14227          | 30868          |
| 12           | Karnataka         | 514090         | 536443         | 1050533        |
| 13           | Kerala            | 22890          | 8080           | 30970          |
| 14           | Madhya Pradesh    | 265194         | 216470         | 481664         |
| 15           | Maharashtra       | 1004175        | 408365         | 1412540        |
| 16           | Manipur           | 288            | 30             | 318            |
| 17           | Meghalaya         | 308            | 307            | 615            |
| 18           | Mizoram           | 3064           | 1364           | 4428           |
| 19           | Nagaland          | 444            | 5005           | 5449           |
| 20           | Odisha            | 22575          | 87038          | 109613         |
| 21           | Punjab            | 35208          | 12473          | 47681          |
| 22           | Rajasthan         | 212406         | 1576139        | 1788545        |
| 23           | Sikkim            | 6044           | 3042           | 9086           |
| 24           | Tamil Nadu        | 352375         | 45136          | 397511         |
| 25           | Telangana         | 107828         | 24608          | 132436         |
| 26           | Tripura           | 444            | 1651           | 2095           |
| 27           | Uttar Pradesh     | 20118          | 50674          | 70792          |
| 28           | Uttarakhand       | 3622           | 2059           | 5681           |
| 29           | West Bengal       | 604            | 50576          | 51180          |
| 30           | Others            | 15169          | 30636          | 45805          |
| <b>Total</b> |                   | <b>4238448</b> | <b>4967025</b> | <b>9205473</b> |

Source: Department of Agriculture, Cooperation & Farmers Welfare

**Table 8.17: State wise Cold Storage capacity (31.03.2017)**

| S.No. | State/UT                   | No. of Project | Capacity (MT)   |
|-------|----------------------------|----------------|-----------------|
| (1)   | (2)                        | (3)            | (4)             |
| 1     | Andaman & Nicobar          | 2              | 210             |
| 2     | Andhra Pradesh & Telangana | 432            | 1757785         |
| 3     | Arunachal Pradesh          | 1              | 5000            |
| 4     | Assam                      | 36             | 157906          |
| 5     | Bihar                      | 305            | 1416095         |
| 6     | Chandigarh                 | 7              | 12462           |
| 7     | Chhattisgarh               | 98             | 484557          |
| 8     | Delhi                      | 97             | 129857          |
| 9     | Goa                        | 29             | 7705            |
| 10    | Gujarat                    | 753            | 2875713         |
| 11    | Haryana                    | 336            | 741446          |
| 12    | Himachal Pradesh           | 63             | 119167          |
| 13    | Jammu & Kashmir            | 36             | 112206          |
| 14    | Jharkhand                  | 58             | 236680          |
| 15    | Karnataka                  | 194            | 553401          |
| 16    | Kerala                     | 196            | 78105           |
| 17    | Lakshadweep                | 1              | 15              |
| 18    | Madhya Pradesh             | 294            | 1253715         |
| 19    | Maharashtra                | 581            | 896730          |
| 20    | Manipur                    | 1              | 3000            |
| 21    | Meghalaya                  | 4              | 8200            |
| 22    | Mizoram                    | 3              | 4471            |
| 23    | Nagaland                   | 2              | 6150            |
| 24    | Odisha                     | 170            | 538139          |
| 25    | Puducherry                 | 3              | 85              |
| 26    | Punjab                     | 655            | 2152003         |
| 27    | Rajasthan                  | 161            | 527893          |
| 28    | Sikkim                     | 2              | 2100            |
| 29    | Tamil Nadu                 | 168            | 316583          |
| 30    | Tripura                    | 14             | 45477           |
| 31    | Uttar Pradesh              | 2285           | 14139098        |
| 32    | Uttarakhand                | 45             | 151421          |
| 33    | West Bengal                | 511            | 5940511         |
|       | <b>All India</b>           | <b>7543</b>    | <b>34673886</b> |

Source: Data upto 2009-10 is from Directorate of Marketing and Inspection (DMI) and National Horticulture Board (NHB), National Horticulture Mission (NHM) & Ministry of Food Processing Industries(MoFPI) for later years.



**Table 8.18: Cost Estimates of Principal Crops- 2014-15**

| Crop             | State            | Cost of Cultivation (₹/Hectare) |          | Cost of Production (₹/Qtl.) | Yield (Qtl./Hec.) |       |
|------------------|------------------|---------------------------------|----------|-----------------------------|-------------------|-------|
|                  |                  | A2+FL                           | C2       | C2                          |                   |       |
| (1)              | (2)              | (3)                             | (4)      | (5)                         | (6)               |       |
| <b>Paddy</b>     | Andhra Pradesh   | 52092.45                        | 78968.33 | 1282.17                     | 58.33             |       |
|                  | Assam            | 37414.70                        | 49886.91 | 1427.84                     | 32.45             |       |
|                  | Bihar            | 26862.34                        | 40096.73 | 1054.94                     | 30.69             |       |
|                  | Chhattisgarh     | 31680.98                        | 45775.07 | 1229.85                     | 33.76             |       |
|                  | Gujarat          | 43303.53                        | 55798.06 | 1095.87                     | 42.33             |       |
|                  | Haryana          | 46032.95                        | 78947.58 | 1531.08                     | 50.53             |       |
|                  | Himachal Pradesh | 26893.42                        | 37070.51 | 1099.80                     | 25.09             |       |
|                  | Jharkhand        | 24997.56                        | 38847.53 | 1083.41                     | 28.35             |       |
|                  | Karnataka        | 48704.20                        | 68315.20 | 1195.71                     | 53.24             |       |
|                  | Kerala           | 53391.99                        | 71971.60 | 1479.24                     | 43.64             |       |
|                  | Madhya Pradesh   | 29281.08                        | 41380.77 | 1416.12                     | 25.44             |       |
|                  | Maharashtra      | 55262.14                        | 68262.45 | 2237.11                     | 25.64             |       |
|                  | Orissa           | 43151.95                        | 56913.99 | 1405.45                     | 36.62             |       |
|                  | Punjab           | 39631.03                        | 73254.48 | 1091.75                     | 66.74             |       |
|                  | Tamil Nadu       | 55778.57                        | 74076.91 | 1397.70                     | 49.49             |       |
|                  | Uttar Pradesh    | 40977.39                        | 58982.33 | 1479.86                     | 37.08             |       |
|                  | Uttarakhand      | 30735.11                        | 45634.39 | 896.47                      | 47.76             |       |
|                  | West Bengal      | 55746.71                        | 71840.42 | 1411.34                     | 44.69             |       |
|                  | <b>Wheat</b>     | Bihar                           | 27472.02 | 41449.06                    | 1230.82           | 26.52 |
|                  |                  | Gujarat                         | 32999.68 | 42296.08                    | 1239.07           | 31.39 |
| Haryana          |                  | 33649.03                        | 61318.70 | 1240.99                     | 39.96             |       |
| Himachal Pradesh |                  | 22866.27                        | 34047.93 | 1750.37                     | 14.32             |       |
| Jharkhand        |                  | 20858.74                        | 28809.65 | 1734.07                     | 13.86             |       |
| Karnataka        |                  | 21188.53                        | 27278.85 | 2354.04                     | 10.16             |       |
| Madhya Pradesh   |                  | 26220.56                        | 43954.60 | 1127.43                     | 32.73             |       |
| Maharashtra      |                  | 34275.35                        | 45942.98 | 1992.76                     | 22.44             |       |
| Punjab           |                  | 27772.52                        | 52590.47 | 1081.84                     | 42.88             |       |
| Rajasthan        |                  | 35872.93                        | 50089.47 | 1156.25                     | 34.58             |       |
| Uttar Pradesh    |                  | 32744.41                        | 51080.58 | 1502.89                     | 25.88             |       |
| Uttarakhand      |                  | 22637.88                        | 38400.52 | 1277.32                     | 24.24             |       |
| West Bengal      |                  | 40418.69                        | 52547.92 | 1585.96                     | 30.82             |       |
| <b>Maize</b>     |                  | Andhra Pradesh                  | 41509.60 | 65916.32                    | 1130.40           | 55.67 |
|                  | Bihar            | 30413.80                        | 43478.29 | 1138.29                     | 31.96             |       |
|                  | Gujarat          | 35859.96                        | 43289.81 | 1931.00                     | 16.04             |       |
|                  | Himachal Pradesh | 22425.48                        | 30457.83 | 1673.25                     | 13.07             |       |
|                  | Jharkhand        | 32602.11                        | 39886.92 | 1007.96                     | 33.02             |       |
|                  | Karnataka        | 30760.69                        | 41402.31 | 1273.66                     | 29.57             |       |
|                  | Madhya Pradesh   | 24803.22                        | 34791.77 | 1262.09                     | 22.91             |       |
|                  | Maharashtra      | 59230.95                        | 74156.68 | 1993.66                     | 32.70             |       |
|                  | Odisha           | 39792.25                        | 51302.50 | 1336.26                     | 37.50             |       |
|                  | Punjab           | 38426.75                        | 51749.20 | 1154.79                     | 38.21             |       |
|                  | Rajasthan        | 33710.97                        | 45020.96 | 1628.96                     | 21.51             |       |
|                  | Tamil Nadu       | 60448.07                        | 80010.51 | 1253.92                     | 60.41             |       |
|                  | Uttar Pradesh    | 20482.40                        | 28770.46 | 1888.58                     | 12.73             |       |

contd.

| Crop          | State          | Cost of Cultivation (₹/Hectare) |          | Cost of Production (₹/Qtl.) | Yield (Qtl./Hec.) |
|---------------|----------------|---------------------------------|----------|-----------------------------|-------------------|
|               |                | A2+FL                           | C2       | C2                          |                   |
| (1)           | (2)            | (3)                             | (4)      | (5)                         | (6)               |
| <b>Jowar</b>  | Andhra Pradesh | 23309.78                        | 37177.30 | 1732.18                     | 16.16             |
|               | Karnataka      | 17515.09                        | 24811.88 | 2266.91                     | 9.06              |
|               | Madhya Pradesh | 23800.24                        | 28541.25 | 2710.85                     | 8.16              |
|               | Maharashtra    | 32734.56                        | 44764.79 | 1951.96                     | 13.78             |
|               | Rajasthan      | 17854.82                        | 25352.68 | 1537.81                     | 7.82              |
|               | Tamil Nadu     | 20763.49                        | 30604.77 | 1678.65                     | 8.88              |
| <b>Bajra</b>  | Gujarat        | 35920.62                        | 46812.70 | 1125.22                     | 27.86             |
|               | Haryana        | 26208.19                        | 37615.55 | 1487.42                     | 17.71             |
|               | Maharashtra    | 35622.93                        | 43373.26 | 2749.83                     | 13.22             |
|               | Rajasthan      | 17888.42                        | 24548.14 | 1149.16                     | 10.77             |
| <b>Barley</b> | Uttar Pradesh  | 21824.39                        | 33693.02 | 1038.43                     | 24.33             |
|               | Rajasthan      | 34436.27                        | 45200.62 | 1002.76                     | 32.16             |
| <b>Ragi</b>   | Uttar Pradesh  | 24638.13                        | 41970.24 | 1450.72                     | 21.70             |
|               | Karnataka      | 43421.41                        | 54317.49 | 3240.98                     | 12.26             |
| <b>Arhar</b>  | Uttarakhand    | 14948.91                        | 19826.99 | 905.79                      | 18.76             |
|               | Andhra Pradesh | 25539.03                        | 36458.55 | 6381.70                     | 5.54              |
| <b>Gram</b>   | Gujarat        | 32507.72                        | 41891.52 | 4550.86                     | 8.87              |
|               | Karnataka      | 22525.78                        | 33585.73 | 3963.24                     | 8.27              |
|               | Madhya Pradesh | 20302.81                        | 33433.45 | 4568.56                     | 6.84              |
|               | Maharashtra    | 42313.15                        | 59401.50 | 5715.19                     | 10.10             |
|               | Orissa         | 13008.82                        | 20897.95 | 6806.19                     | 3.00              |
|               | Uttar Pradesh  | 21950.62                        | 40712.59 | 4184.48                     | 7.92              |
|               | Andhra Pradesh | 32334.44                        | 47413.80 | 3085.18                     | 15.02             |
|               | Bihar          | 19029.27                        | 33262.94 | 2389.66                     | 13.49             |
| <b>Urad</b>   | Chhattisgarh   | 15971.53                        | 23683.24 | 3101.72                     | 7.34              |
|               | Haryana        | 17993.23                        | 32706.69 | 3313.40                     | 9.17              |
|               | Jharkhand      | 13486.73                        | 17706.39 | 1631.31                     | 10.38             |
|               | Karnataka      | 20886.46                        | 31942.05 | 2919.60                     | 10.73             |
|               | Madhya Pradesh | 21376.69                        | 33952.35 | 2911.56                     | 11.00             |
|               | Maharashtra    | 26147.88                        | 37788.79 | 3401.88                     | 10.73             |
|               | Rajasthan      | 16872.39                        | 24002.81 | 3440.21                     | 6.40              |
|               | Uttar Pradesh  | 22456.03                        | 32529.72 | 5507.26                     | 5.39              |
|               | Andhra Pradesh | 14608.64                        | 33527.11 | 3394.44                     | 9.83              |
|               | Chhattisgarh   | 23655.42                        | 31650.43 | 3394.59                     | 8.69              |
| <b>Moong</b>  | Madhya Pradesh | 17185.26                        | 25638.75 | 3482.43                     | 7.05              |
|               | Maharashtra    | 21192.57                        | 28123.66 | 6107.01                     | 4.54              |
|               | Orissa         | 14857.29                        | 21957.61 | 5574.98                     | 3.79              |
|               | Tamil Nadu     | 18007.38                        | 27987.31 | 4446.77                     | 6.19              |
|               | Uttar Pradesh  | 14438.71                        | 22741.98 | 4756.45                     | 4.67              |
|               | Andhra Pradesh | 15185.13                        | 25132.57 | 4655.63                     | 5.37              |
|               | Gujarat        | 20823.73                        | 23778.18 | 11264.37                    | 1.99              |
|               | Karnataka      | 15987.69                        | 23174.39 | 5790.59                     | 3.95              |
| <b>Lentil</b> | Maharashtra    | 24601.39                        | 32001.87 | 8098.91                     | 3.92              |
|               | Orissa         | 13274.41                        | 19257.07 | 5618.72                     | 3.29              |
|               | Rajasthan      | 14806.99                        | 20624.38 | 5267.63                     | 3.48              |
|               | Bihar          | 16457.57                        | 30105.16 | 2399.78                     | 11.98             |
|               | Madhya Pradesh | 19037.02                        | 31121.42 | 3575.36                     | 8.34              |
|               | Uttar Pradesh  | 18572.54                        | 30043.84 | 6797.93                     | 4.20              |
|               | West Bengal    | 22327.40                        | 38680.61 | 2518.08                     | 14.98             |

contd.

| Crop             | State          | Cost of Cultivation (₹/Hectare) |           | Cost of Production (₹/Qtl.) | Yield (Qtl./Hec.) |
|------------------|----------------|---------------------------------|-----------|-----------------------------|-------------------|
|                  |                | A2+FL                           | C2        | C2                          |                   |
| (1)              | (2)            | (3)                             | (4)       | (5)                         | (6)               |
| <b>Groundnut</b> | Andhra Pradesh | 36939.57                        | 53753.88  | 4607.64                     | 10.79             |
|                  | Gujarat        | 54841.87                        | 70827.74  | 3409.54                     | 17.07             |
|                  | Karnataka      | 37367.82                        | 49950.00  | 4541.52                     | 10.27             |
|                  | Maharashtra    | 44470.14                        | 57079.41  | 5783.84                     | 8.87              |
|                  | Orissa         | 41989.55                        | 59255.51  | 4516.02                     | 12.82             |
|                  | Rajasthan      | 29477.47                        | 38686.20  | 3777.03                     | 9.72              |
|                  | Tamil Nadu     | 57324.24                        | 75449.68  | 3571.59                     | 19.65             |
| <b>R &amp; M</b> | Assam          | 27502.48                        | 35801.81  | 4353.30                     | 8.22              |
|                  | Bihar          | 16038.56                        | 28849.77  | 2307.82                     | 11.83             |
|                  | Gujarat        | 26250.95                        | 39449.70  | 2068.79                     | 18.41             |
|                  | Haryana        | 24941.42                        | 47679.26  | 2930.17                     | 14.79             |
|                  | Madhya Pradesh | 18674.03                        | 34489.10  | 2216.82                     | 14.64             |
|                  | Rajasthan      | 23925.44                        | 34818.04  | 2610.63                     | 12.44             |
|                  | Uttar Pradesh  | 25621.24                        | 41477.32  | 3849.39                     | 9.98              |
| West Bengal      | 32240.39       | 45335.11                        | 3113.76   | 14.21                       |                   |
| <b>Soy Bean</b>  | Andhra Pradesh | 28024.29                        | 40321.28  | 3854.21                     | 10.36             |
|                  | Chhattisgarh   | 15940.30                        | 23946.41  | 2510.75                     | 9.19              |
|                  | Madhya Pradesh | 23971.63                        | 34985.38  | 2661.81                     | 12.53             |
|                  | Maharashtra    | 36054.83                        | 45160.23  | 4521.97                     | 9.72              |
|                  | Rajasthan      | 23017.67                        | 29402.36  | 3916.13                     | 6.96              |
| <b>Sunflower</b> | Andhra Pradesh | 23847.41                        | 32370.95  | 7923.19                     | 4.06              |
|                  | Karnataka      | 19913.10                        | 28340.18  | 3159.53                     | 8.83              |
| <b>Safflower</b> | Karnataka      | 10248.46                        | 18231.29  | 2113.43                     | 8.39              |
|                  | Maharashtra    | 18491.84                        | 22335.92  | 6972.54                     | 3.19              |
| <b>Nigerseed</b> | Madhya Pradesh | 13824.32                        | 17978.15  | 5697.21                     | 3.00              |
|                  | Orissa         | 12341.82                        | 16023.77  | 6302.23                     | 2.48              |
| <b>Sesamum</b>   | Andhra Pradesh | 19282.00                        | 29638.95  | 7177.67                     | 4.05              |
|                  | Gujarat        | 29055.91                        | 39359.26  | 6903.85                     | 5.64              |
|                  | Madhya Pradesh | 16725.67                        | 29141.57  | 5289.28                     | 5.38              |
|                  | Orissa         | 16560.41                        | 24694.29  | 5701.60                     | 4.28              |
|                  | Rajasthan      | 13848.45                        | 26346.97  | 7863.26                     | 3.30              |
|                  | Uttar Pradesh  | 10461.47                        | 16090.93  | 6973.32                     | 2.25              |
|                  | West Bengal    | 29269.19                        | 41501.10  | 3375.65                     | 11.88             |
| <b>Sugarcane</b> | Andhra Pradesh | 108236.30                       | 163567.80 | 218.45                      | 730.90            |
|                  | Karnataka      | 73659.48                        | 118220.50 | 143.45                      | 808.81            |
|                  | Maharashtra    | 145489.58                       | 193364.50 | 182.74                      | 993.77            |
|                  | Tamil Nadu     | 124126.89                       | 160892.00 | 171.05                      | 926.39            |
|                  | Uttar Pradesh  | 54449.19                        | 97917.09  | 173.25                      | 539.07            |
|                  | Uttarakhand    | 45667.40                        | 92069.24  | 148.79                      | 578.17            |
| <b>Cotton</b>    | Andhra Pradesh | 56730.97                        | 79837.62  | 4661.68                     | 17.08             |
|                  | Gujarat        | 57070.13                        | 73271.72  | 3659.32                     | 19.67             |
|                  | Haryana        | 45095.36                        | 64904.91  | 5573.05                     | 10.85             |
|                  | Karnataka      | 42891.68                        | 59042.24  | 4084.52                     | 14.02             |
|                  | Madhya Pradesh | 59274.65                        | 76832.02  | 5564.46                     | 12.82             |
|                  | Maharashtra    | 54887.56                        | 72391.18  | 4631.87                     | 15.31             |
|                  | Orissa         | 35654.78                        | 44347.32  | 6348.29                     | 6.82              |
|                  | Punjab         | 52923.06                        | 76777.61  | 3890.58                     | 18.39             |
|                  | Rajasthan      | 49320.05                        | 67922.05  | 3821.91                     | 16.73             |
|                  | Tamil Nadu     | 69912.63                        | 88992.70  | 3770.22                     | 23.51             |

contd.

| Crop          | State            | Cost of Cultivation (₹/Hectare) |           | Cost of Production (₹/Qtl.) | Yield (Qtl./Hec.) |
|---------------|------------------|---------------------------------|-----------|-----------------------------|-------------------|
|               |                  | A2+FL                           | C2        | C2                          |                   |
| (1)           | (2)              | (3)                             | (4)       | (5)                         | (6)               |
| <b>Jute</b>   | Assam            | 55065.78                        | 68361.55  | 2627.43                     | 24.51             |
|               | Bihar            | 18814.86                        | 29738.61  | 2415.46                     | 11.77             |
|               | Orissa           | 52753.86                        | 66408.93  | 3495.91                     | 16.95             |
|               | West Bengal      | 58351.73                        | 80286.87  | 2655.57                     | 27.29             |
| <b>Onion</b>  | Gujarat          | 92472.64                        | 125716.20 | 852.24                      | 146.81            |
|               | Karnataka        | 41828.75                        | 54731.59  | 1210.34                     | 44.32             |
|               | Maharashtra      | 120342.20                       | 171271.10 | 754.14                      | 225.89            |
| <b>Potato</b> | Assam            | 101036.96                       | 124987.60 | 1117.94                     | 111.80            |
|               | Bihar            | 60663.42                        | 79846.72  | 448.18                      | 178.16            |
|               | Himachal Pradesh | 86109.88                        | 110717.80 | 993.84                      | 111.40            |
|               | Uttar Pradesh    | 105856.91                       | 134770.90 | 712.73                      | 189.09            |
|               | West Bengal      | 123377.36                       | 146702.30 | 565.97                      | 259.21            |

Source: Directorate of Economics and Statistics, DAC&FW

- Note: 1. Cost A2 includes all actual expenses in cash & kind incurred in production by Owner and rent paid for leased-in-land.
- 2 Cost A2 includes all actual expenses in cash & kind incurred in production by owner, interest on value of owned fixed capital assets(excluding land), rental value of owned land(net of land revenue) and imputed value of family labour.
- 3 Family Labour is calculated on the basis of statutory wage rate or the actual market rate, whichever is higher.

**Table 8.19: All-India projected Cost of Production (A2+FL) of Major Crops in India**

|                       |                    | (₹ per quintal)   |                   |         |                  |         |
|-----------------------|--------------------|-------------------|-------------------|---------|------------------|---------|
| Sl. No.               | Commodity          | 2013-14           | 2014-15           | 2015-16 | 2016-17          | 2017-18 |
| (1)                   | (2)                | (3)               | (4)               | (5)     | (6)              | (7)     |
| <b>KHARIF CROPS*</b>  |                    |                   |                   |         |                  |         |
| 1                     | PADDY              | 961               | 978               | 1020    | 1045             | 1117    |
| 2                     | JOWAR              | 1269              | 1370              | 1467    | 1501             | 1556    |
| 3                     | BAJRA              | 768               | 832               | 893     | 925              | 949     |
| 4                     | MAIZE              | 860               | 914               | 941     | 966              | 1044    |
| 5                     | RAGI               | 1338              | 1474              | 1688    | 1733             | 1861    |
| 6                     | ARHAR(Tur)         | 3090              | 3105              | 3237    | 3241             | 3318    |
| 7                     | MOONG              | 3775              | 3890              | 3993    | 4065             | 4286    |
| 8                     | URAD               | 3144              | 3225              | 3455    | 3584             | 3265    |
| 9                     | COTTON             | 2485              | 2510              | 2753    | 2889             | 3276    |
| 10                    | GROUNDNUT IN SHELL | 2720              | 3232              | 3314    | 3371             | 3159    |
| 11                    | SUNFLOWER SEED     | 1692              | 1729              | 1770    | 1852             | 3481    |
| 12                    | SoyBEEN (BLACK)    | 3000              | 3129              | 3282    | 3479             | 2121    |
| 13                    | SESAMUM            | 2919              | 3765              | 4132    | 4188             | 4067    |
| 14                    | NIGERSEED          | 2279              | 3084              | 3146    | 3366             | 3912    |
| <b>RABI CROPS**</b>   |                    |                   |                   |         |                  |         |
| 1                     | WHEAT              | 687               | 679               | 744     | 785              | 797     |
| 2                     | BARLEY             | 620               | 676               | 735     | 776              | 816     |
| 3                     | GRAM               | 1926              | 1786              | 1902    | 2124             | 2241    |
| 4                     | MASUR (LENTIL)     | 1696              | 1799              | 1866    | 2015             | 2174    |
| 5                     | RAPESEED/MUSTARD   | 1260              | 1307              | 1504    | 1702             | 1871    |
| 6                     | SAFFLOWER          | 2754              | 2558              | 3025    | 3057             | 3049    |
| <b>OTHER CROPS***</b> |                    |                   |                   |         |                  |         |
| 1                     | JUTE               | 1015 <sup>@</sup> | 1702              | 2042    | 2125             | 2160    |
| 2                     | SUGARCANE          | 120               | 123               | 140     | 140 <sup>#</sup> | 145     |
| 3                     | COPRA              | 3705              | 4398 <sup>^</sup> | 4138    | 4676             | 4758    |

Source: Price Policy Reports of Commission for Agricultural Costs and Prices (CACP).

\* Figures are for Kharif Marketing Season of the respective year

\*\* For Rabi Marketing Season of the respective year

\*\*\* For Marketing Season of respective year

@ : The figure consists of only A2 and not FL

#Unadjusted for 9.5% Recovery of Sugarcane for 2016-17 Sugar Season

^The figure for this year is only available for Kerala

**Table 8.20: All India Annual Average Daily Wage Rate**

| Crop Year | Agri. Wages (in Rupees) |        |
|-----------|-------------------------|--------|
|           | Male                    | Female |
| (1)       | (2)                     | (3)    |
| 2006-07   | 82                      | 62     |
| 2007-08   | 91                      | 70     |
| 2008-09   | 108                     | 82     |
| 2009-10   | 124                     | 95     |
| 2010-11   | 149                     | 115    |
| 2011-12   | 183                     | 134    |
| 2012-13   | 214                     | 158    |
| 2013-14   | 229                     | 178    |
| 2014-15   | 268                     | 200    |
| 2015-16   | 281                     | 218    |

Source: Directorate of Economics & Statistics

Note 1. All India annual average is calculated for 20 major States.

Note 2. Average Agricultural Wages is taken as average of five operations.

**Chart 8 (b): Trends in Average Daily Wage Rate of Male & Female Workers in Agricultural Operations**

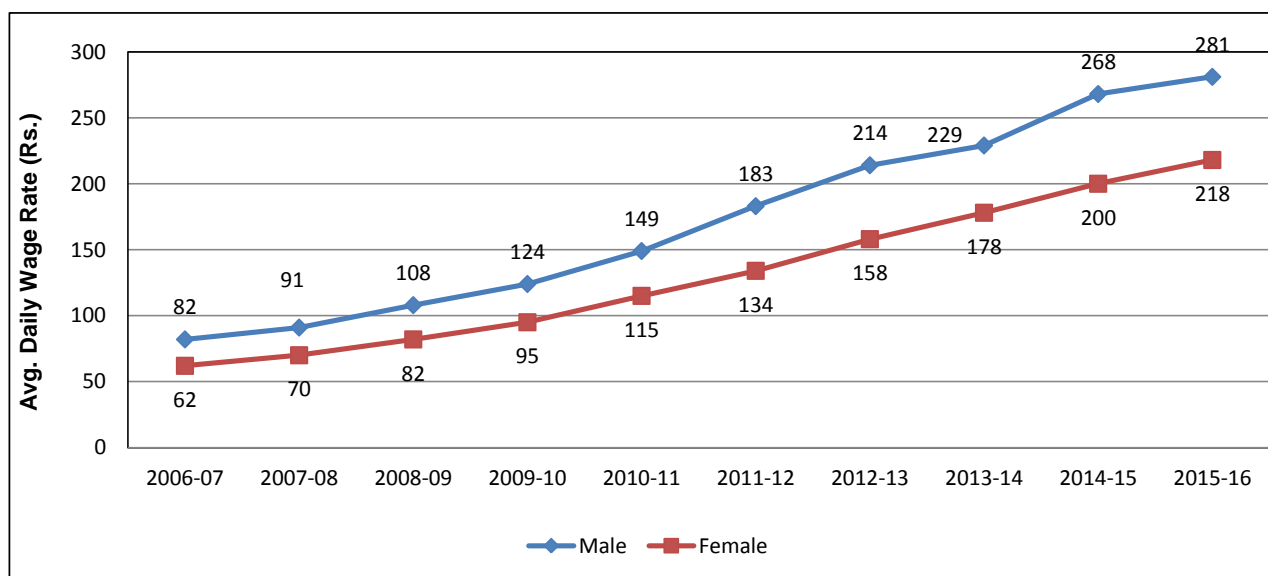

Source: Directorate of Economics & Statistics

# PRICES & PROCUREMENT

**Table 9.1 : Minimum Support Prices of various Agricultural Commodities  
(According to Crop Year)**

(As on 24.10.2017)  
(₹ per quintal)

| S. No.              | Commodity                         | Variety         | 2013-14 | 2014-15 | 2015-16 | 2016-17 | 2017-18 |
|---------------------|-----------------------------------|-----------------|---------|---------|---------|---------|---------|
| (1)                 | (2)                               | (3)             | (4)     | (5)     | (6)     | (7)     | (8)     |
| <b>Kharif Crops</b> |                                   |                 |         |         |         |         |         |
| 1                   | Paddy                             | Common          | 1310    | 1360    | 1410    | 1470    | 1550    |
|                     |                                   | Grade 'A'       | 1345    | 1400    | 1450    | 1510    | 1590    |
| 2                   | Jowar                             | Hybrid          | 1500    | 1530    | 1570    | 1625    | 1700    |
|                     |                                   | <u>Maldandi</u> | 1520    | 1550    | 1590    | 1650    | 1725    |
| 3                   | Bajra                             |                 | 1250    | 1250    | 1275    | 1330    | 1425    |
| 4                   | Maize                             |                 | 1310    | 1310    | 1325    | 1365    | 1425    |
| 5                   | Ragi                              |                 | 1500    | 1550    | 1650    | 1725    | 1900    |
| 6                   | Arhar(Tur)                        |                 | 4300    | 4350    | 4625^   | 5050^^  | 5450^   |
| 7                   | Moong                             |                 | 4500    | 4600    | 4850^   | 5225^^  | 5575^   |
| 8                   | Urad                              |                 | 4300    | 4350    | 4625^   | 5000^^  | 5400^   |
| 9                   | Cotton                            | Medium Staple   | 3700    | 3750    | 3800    | 3860    | 4020    |
|                     |                                   | Long Staple     | 4000    | 4050    | 4100    | 4160    | 4320    |
| 10                  | Groundnut In Shell                |                 | 4000    | 4000    | 4030    | 4220*   | 4450^   |
| 11                  | Sunflower Seed                    |                 | 3700    | 3750    | 3800    | 3950*   | 4100*   |
| 12                  | Soybean                           |                 | 2560    | 2560    | 2600    | 2775*   | 3050^   |
| 13                  | Sesamum                           |                 | 4500    | 4600    | 4700    | 5000^   | 5300*   |
| 14                  | Nigerseed                         |                 | 3500    | 3600    | 3650    | 3825*   | 4050*   |
| <b>Rabi Crops</b>   |                                   |                 |         |         |         |         |         |
| 15                  | Wheat                             |                 | 1400    | 1450    | 1525    | 1625    | 1735    |
| 16                  | Barley                            |                 | 1100    | 1150    | 1225    | 1325    | 1410    |
| 17                  | Gram                              |                 | 3100    | 3175    | 3500**  | 4000^   | 4400@   |
| 18                  | Masur (Lentil)                    |                 | 2950    | 3075    | 3400**  | 3950@   | 4250*   |
| 19                  | Rapeseed/Mustard                  |                 | 3050    | 3100    | 3350    | 3700*   | 4000*   |
| 20                  | Safflower                         |                 | 3000    | 3050    | 3300    | 3700*   | 4100*   |
| 21                  | Toria                             |                 | 3020    | 3020    | 3290    | 3560    |         |
| <b>Other Crops</b>  |                                   |                 |         |         |         |         |         |
| 22                  | Copra (Calendar Year)             | Milling         | 5250    | 5250    | 5550    | 5950    | 6500    |
|                     |                                   | Ball            | 5500    | 5500    | 5830    | 6240    | 6785    |
| 23                  | De-Husked Coconut (Calendar Year) |                 | 1425    | 1425    | 1500    | 1600    | 1760    |
| 24                  | Jute                              |                 | 2300    | 2400    | 2700    | 3200    | 3500    |
| 25                  | Sugarcane\$                       |                 | 210     | 220     | 230     | 230     | 255     |

# Figures in brackets indicate percentage increase.

\$ Fair and remunerative price.

\* Including Bonus of Rs. 100 per quintal.

\*\* Including Bonus of Rs. 75 per quintal .

^ Including Bonus of Rs. 200 per quintal.

^^ Including Bonus of Rs. 425 per quintal.

@ Including Bonus of Rs. 150 per quintal

Source: Directorate of Economics & Statistics, DAC&FW



**Table 9.2: State-wise Procurement of Rice and Wheat in Major Rice and Wheat Producing States**

|                            | ('000 Tonnes) |              |              |              |              |              |              |
|----------------------------|---------------|--------------|--------------|--------------|--------------|--------------|--------------|
| State                      | 2011-12       | 2012-13      | 2013-14      | 2014-15      | 2015-16      | 2016-17      | 2017-18*     |
| (1)                        | (2)           | (3)          | (4)          | (5)          | (6)          | (7)          | (8)          |
| <b>Rice (Oct-Sept)</b>     |               |              |              |              |              |              |              |
| Punjab                     | 7731          | 8558         | 8106         | 7786         | 93.5         | 11052        |              |
| Haryana                    | 2007          | 2609         | 2406         | 2015         | 2861         | 3583         |              |
| Uttar Pradesh              | 3355          | 2286         | 1127         | 1698         | 2910         | 2354         |              |
| Andhra Pradesh             | 7540          | 6464         | 3737         | 3596         | 4336         | 3724         |              |
| Telangana                  | -             | -            | 4353         | 3504         | 158          | 3595         |              |
| Madhya Pradesh             | 635           | 898          | 1045         | 807          | 849          | 1314         |              |
| Odisha                     | 2864          | 3613         | 2801         | 3357         | 3369         | 3630         |              |
| Tamil Nadu                 | 1596          | 481          | 684          | 1051         | 1192         | 144          |              |
| West Bengal                | 2036          | 1766         | 1359         | 2032         | 1568         | 1923         |              |
| Chhattisgarh               | 4115          | 4804         | 4290         | 3423         | 3442         | 4022         |              |
| Uttarakhand                | 378           | 497          | 463          | 465          | 598          | 706          |              |
| Others                     | 2784          | 2068         | 1474         | 2603         | 2162         | 2058         |              |
| <b>All-India</b>           | <b>35041</b>  | <b>34044</b> | <b>31845</b> | <b>32040</b> | <b>34217</b> | <b>38105</b> |              |
| <b>Wheat (April-March)</b> |               |              |              |              |              |              |              |
| Punjab                     | 10958         | 12834        | 10897        | 11641        | 10344        | 10649        | 11706        |
| Uttar Pradesh              | 3461          | 5063         | 682          | 628          | 2267         | 797          | 3699         |
| Haryana                    | 6928          | 8665         | 5873         | 6495         | 6778         | 6752         | 7432         |
| Rajasthan                  | 1303          | 1964         | 1268         | 2159         | 1300         | 762          | 1245         |
| Chhattisgarh               | -             | -            | 9            | -            |              |              |              |
| Uttarakhand                | 42            | 139          | 5            | 1            | 4            | 2            | 2            |
| Bihar                      | 557           | 772          | 0            | 0            | 0            | -            |              |
| Chandigarh                 | 7             | 17           | 8            | 5            | 11           | 7            | 8            |
| Delhi                      | 8             | 31           | Neg.         | 0            | 2            | -            |              |
| Gujarat                    | 105           | 156          | 0            | 0            | 73           | -            | 7            |
| Himachal Pradesh           | 1             | 1            | Neg.         | Neg.         | 0            | -            |              |
| Jammu & Kashmir            | -             | 9            | 0            | 0            | 0            | -            |              |
| Madhya Pradesh             | 4965          | 8493         | 6355         | 7094         | 7309         | 3992         | 6725         |
| Maharashtra                | -             | 2            | 0            | 0            | 0            | -            |              |
| Jharkhand                  | -             | -            | 0            | 0            | 0            | -            |              |
| West Bengal                | -             | 2            | 2            | 0            | 0            | -            |              |
| <b>All-India</b>           | <b>28335</b>  | <b>38148</b> | <b>25092</b> | <b>28023</b> | <b>28088</b> | <b>22962</b> | <b>30824</b> |

\* Position as on 21.09.2017 and prior to Kharif 2017-18 harvesting

Neg : Below 500 tonnes.

Source : Department of Food and Public Distribution.

**Table 9.3: Trends in Wholesale Price Index of Commercial Crops (Base: 2004-05=100)**

| Commodity                         | Weight      | 2011-12      | 2012-13      | 2013-14      | 2014-15      | 2015-16      | 2016-17      |
|-----------------------------------|-------------|--------------|--------------|--------------|--------------|--------------|--------------|
| (1)                               | (2)         | (3)          | (4)          | (5)          | (6)          | (7)          | (8)          |
| <b>A. Oilseeds</b>                | <b>1.78</b> | <b>158.8</b> | <b>198.0</b> | <b>202.6</b> | <b>208.9</b> | <b>214.9</b> | <b>217.3</b> |
| Groundnut Seed                    | 0.40        | 200.0        | 246.9        | 219.1        | 210.3        | 246.2        | 264.9        |
| Rape & Mustard Seed               | 0.34        | 149.8        | 202.7        | 189.3        | 193.9        | 225.0        | 231.0        |
| Cotton Seed                       | 0.21        | 143.4        | 162.1        | 177.6        | 172.8        | 196.7        | 227.7        |
| Copra (Coconut)                   | 0.25        | 112.9        | 92.4         | 117.4        | 186.2        | 147.4        | 124.9        |
| Gingelly Seed (Sesamum)           | 0.07        | 203.8        | 312.4        | 417.5        | 425.5        | 312.5        | 312.4        |
| Niger Seed                        | 0.01        | 167.1        | 192.3        | 174.2        | 199.1        | 334.3        | 325.2        |
| Safflower (Kardi Seed)            | 0.01        | 138.4        | 149.5        | 158.0        | 136.0        | 151.9        | 160.1        |
| Sunflower                         | 0.08        | 162.7        | 181.7        | 193.8        | 183.3        | 194.5        | 180.4        |
| Soy Bean                          | 0.37        | 140.8        | 211.9        | 226.3        | 216.5        | 210.0        | 196.4        |
| <i>A1 Edible Oils</i>             | 3.04        | 135.7        | 148.1        | 147.0        | 145.0        | 148.6        | 156.0        |
| Gingelly Oil                      | 0.05        | 146.4        | 171.3        | 183.1        | 178.5        | 165.3        | 185.0        |
| Mustard & Rapeseed Oil            | 0.45        | 135.9        | 154.2        | 154.0        | 157.5        | 180.4        | 182.5        |
| Copra Oil                         | 0.10        | 119.9        | 114.4        | 121.2        | 139.8        | 149.0        | 140.3        |
| Groundnut Oil                     | 0.30        | 163.8        | 192.6        | 181.6        | 167.3        | 192.3        | 214.4        |
| Cotton Seed Oil                   | 0.26        | 149.5        | 175.5        | 176.8        | 175.7        | 184.9        | 198.2        |
| Sunflower Oil                     | 0.17        | 132.0        | 138.0        | 131.8        | 124.9        | 131.1        | 133.5        |
| Soy Bean Oil                      | 0.38        | 147.2        | 162.2        | 159.2        | 153.5        | 148.8        | 156.7        |
| <b>B. Fruits and Vegetables</b>   | <b>3.84</b> | <b>183.2</b> | <b>198.4</b> | <b>244.3</b> | <b>257.3</b> | <b>254.0</b> | <b>255.2</b> |
| <i>B1. Vegetables</i>             | 1.74        | 179.3        | 210.1        | 294.5        | 276.6        | 268.5        | 252.0        |
| Potato                            | 0.20        | 129.0        | 207.0        | 220.1        | 297.2        | 164.1        | 227.1        |
| Onion                             | 0.18        | 186.7        | 232.5        | 482.2        | 333.7        | 447.3        | 247.1        |
| <i>B2. Fruits</i>                 | 2.11        | 186.4        | 188.8        | 202.9        | 241.5        | 242.0        | 257.8        |
| Banana                            | 0.34        | 173.4        | 210.5        | 246.6        | 288.2        | 265.5        | 298.9        |
| Apple                             | 0.10        | 220.4        | 241.4        | 228.6        | 240.1        | 234.5        | 271.8        |
| Orange                            | 0.13        | 237.4        | 228.3        | 208.9        | 237.7        | 219.6        | 234.3        |
| <b>C. Condiments &amp; Spices</b> | <b>0.57</b> | <b>237.5</b> | <b>209.5</b> | <b>245.6</b> | <b>298.8</b> | <b>342.6</b> | <b>348.1</b> |
| Black Pepper                      | 0.03        | 402.9        | 519.0        | 553.2        | 736.7        | 724.9        | 739.2        |
| Chillies(Dry)                     | 0.16        | 277.1        | 235.1        | 267.0        | 296.7        | 358.6        | 392.1        |
| Turmeric                          | 0.08        | 214.9        | 166.3        | 215.3        | 229.6        | 255.6        | 246.1        |
| <b>Raw Cotton</b>                 | <b>0.70</b> | <b>225.2</b> | <b>206.0</b> | <b>236.5</b> | <b>206.1</b> | <b>189.9</b> | 224.2        |
| <b>Raw Jute</b>                   | <b>0.06</b> | <b>222.5</b> | <b>242.4</b> | <b>261.9</b> | <b>288.1</b> | <b>403.5</b> | <b>447.9</b> |

Source: Office of the Economic Adviser, Ministry of Commerce & Industry.

**Chart 9(a): Month-wise trend in Food Inflation under WPI and CPI**

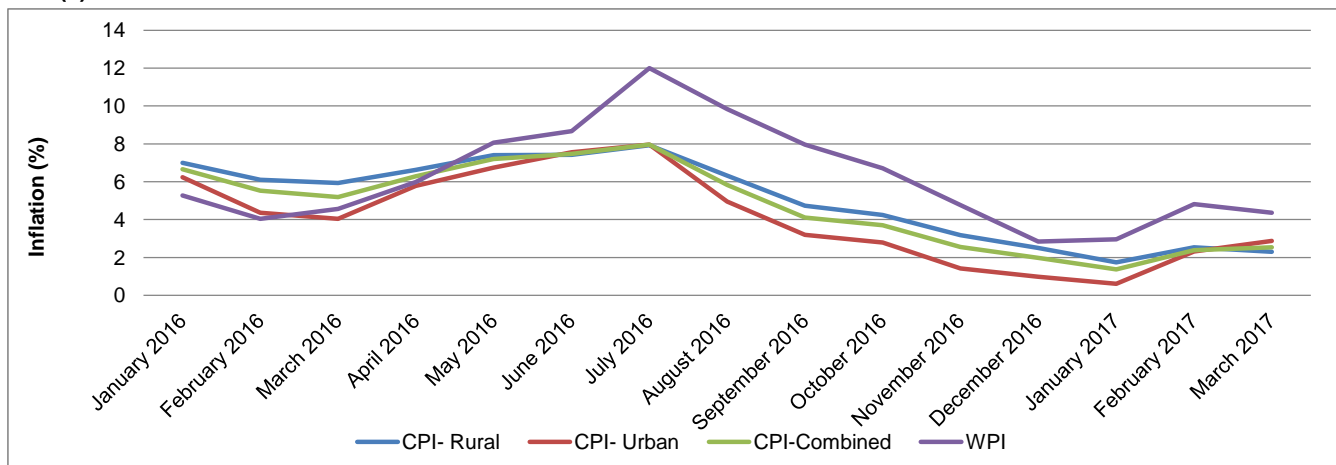

Note: CPI is based on new series with Base 2012=100 and WPI with Base 2004-05=100  
 Source: Ministry of Commerce & Industry and CSO

**Chart 9(b): Trends in Inflation (WPI) of Food Products, Food Articles and All Commodities**

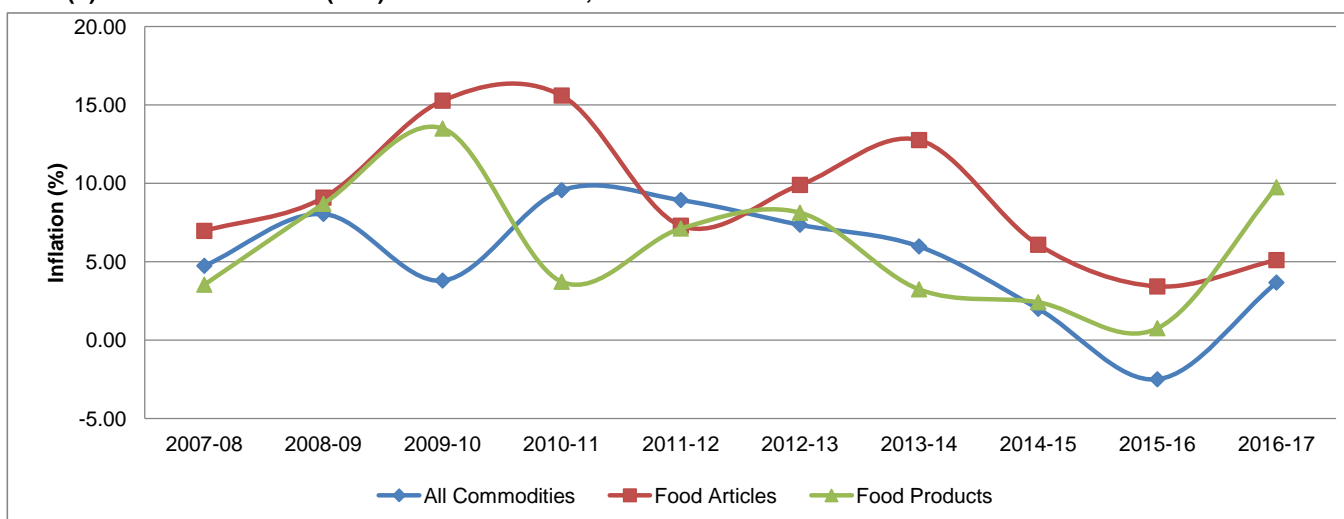

Source: Ministry of Commerce & Industry and CSO

PER CAPITA  
AVAILABILITY  
&  
EXPENDITURE

**Table 10.1 Per Capita Net Availability of Foodgrains (Per Annum) in India**

| Year    | (Kgs Per Year) |       |               |         |      |        |             |
|---------|----------------|-------|---------------|---------|------|--------|-------------|
|         | Rice           | Wheat | Other Cereals | Cereals | Gram | Pulses | Food Grains |
| (1)     | (2)            | (3)   | (4)           | (5)     | (6)  | (7)    | (8)         |
| 1951    | 58.0           | 24.0  | 40.0          | 122.0   | 8.2  | 22.1   | 144.1       |
| 1961    | 73.4           | 28.9  | 43.6          | 145.9   | 11.0 | 25.2   | 171.1       |
| 1971    | 70.3           | 37.8  | 44.3          | 152.4   | 7.3  | 18.7   | 171.1       |
| 1981    | 72.2           | 47.3  | 32.8          | 152.3   | 4.9  | 13.7   | 166.0       |
| 1991    | 80.9           | 60.0  | 29.2          | 171.0   | 4.9  | 15.2   | 186.2       |
| 2001    | 69.5           | 49.6  | 20.5          | 141.0   | 2.9  | 10.9   | 151.9       |
| 2011    | 66.3           | 59.7  | 23.9          | 149.9   | 5.3  | 15.7   | 170.9       |
| 2012    | 69.4           | 57.8  | 21.9          | 149.1   | 4.9  | 15.2   | 169.3       |
| 2013    | 72.1           | 66.8  | 19.2          | 158.1   | 5.6  | 15.8   | 179.5       |
| 2014    | 72.3           | 66.8  | 22.6          | 161.6   | 6.0  | 16.9   | 178.6       |
| 2015    | 67.9           | 61.3  | 28.4          | 153.8   | 5.1  | 16.0   | 169.8       |
| 2016    | 67.2           | 72.9  | 26.1          | 162.0   | 4.8  | 15.9   | 177.9       |
| 2017(P) | 69.3           | 70.1  | 30.0          | 164.9   | 6.3  | 19.9   | 184.7       |

P- Provisional figures based on 4th Advance Estimates of production for 2016-17

Note:- The net availability of foodgrains is estimated to be Gross Production (-) seed, feed & wastage (-) exports (+) imports(+/-) change in stocks.

The net availability of foodgrains divided by the population estimates for a particular year indicate per capita availability of foodgrains in terms of kg/year. Net availability, thus worked out further divided by the number of days in a year i.e., 365 days gives us net availability of foodgrains in terms of grams/ day.

Figures in respect of per capita net availability given above are not strictly representative of actual level of consumption in the country especially as they do not take in to account any change in stocks in possession of traders, producers and consumers.

Foodgrains includes rice, wheat, other cereals and all pulses

Source: Directorate of Economics and Statistics, DAC&FW

**Table 10.2 Per Capita Availability of Certain Important Articles of Consumption**

| Year    | Edible Oils <sup>a</sup> | Vanaspati <sup>b</sup> | Sugar     | Cloth (meters) <sup>d</sup> |          | Total | Tea (gm) | Coffee (gm) |
|---------|--------------------------|------------------------|-----------|-----------------------------|----------|-------|----------|-------------|
|         | (kg.)                    | (kg.)                  | (Nov-Oct) | Cotton <sup>e</sup>         | Man-made |       |          |             |
| (1)     | (2)                      | (3)                    | (4)       | (5)                         | (6)      | (7)   | (8)      | (9)         |
| 1980-81 | 3.8                      | 1.2                    | 7.3       | 12.9                        | 4.4      | 17.3  | 511      | 79          |
| 1990-91 | 5.5                      | 1.0                    | 12.7      | 15.1                        | 9.0      | 24.1  | 612      | 59          |
| 2000-01 | 8.2                      | 1.3                    | 15.8      | 14.2                        | 16.5     | 30.7  | 631      | 58          |
| 2009-10 | 13.3                     | 1.1                    | 17.9      | 19.7                        | 23.4     | 43.1  | 709      | 86          |
| 2010-11 | 13.6                     | 1.0                    | 17.0      | 21.4                        | 22.6     | 44.0  | 715      | 90          |
| 2011-12 | 13.8                     | 1.0                    | 18.7      | 19.8                        | 20.7     | 40.5  | 728      | 95          |
| 2012-13 | 15.8                     | 0.7                    | 18.7      | 19.9                        | 18.6     | 38.5  | 779      | 97          |
| 2013-14 | 16.8                     | 0.8                    | 19.5      | 19.9                        | 16.4     | 36.2  | 744      | 100         |
| 2014-15 | 18.3                     | 0.8                    | 20.3      | 23.6                        | 17.0     | 40.6  | 752      | 100         |
| 2015-16 | 17.7                     | 0.8                    | 19.4(P)   | 24.6                        | 15.9     | 40.5  | 758      | 100         |

(P) Provisional

Note: a: Includes Groundnut Oil, Rapeseed and Mustard Oil, Sesamum Oil, Nigerseed Oil, Soy Bean Oil and Sunflower Oil but excludes oil for manufacture of Vanaspati.

b: Relates to calendar year.

c: Relates to actual releases for domestic consumption.

d: The data of cloth; prior to 1980-81 is calendar year wise, in meters up to 1984-85 and square meter from 1985-86 onwards.

e: Figures for blended/mixed fabrics were not separately available prior to 1969. These have been included under man-made fibre fabrics after 1969.

f: Figures upto 1971-72 relate to coffee season and thereafter on calendar year basis. The figures for 1972-73 correspond to 1973 and so on.

Source: Economic Survey 2017-18

**Table 10.3: Trends in Consumer Expenditure since 2004-05 (percentage composition)**

| Item group               | Rural                               |              |              | Urban                               |              |              |
|--------------------------|-------------------------------------|--------------|--------------|-------------------------------------|--------------|--------------|
|                          | Share in total consumer expenditure |              |              | Share in total consumer expenditure |              |              |
|                          | 2004-05                             | 2009-10      | 2011-12      | 2004-05                             | 2009-10      | 2011-12      |
| (1)                      | (2)                                 | (3)          | (4)          | (5)                                 | (6)          | (7)          |
| Cereal                   | 18.0                                | 15.6         | 12.0         | 10.1                                | 9.1          | 7.3          |
| Gram                     | 0.1                                 | 0.2          | 0.2          | 0.1                                 | 0.1          | 0.1          |
| Cereal substitutes       | 0.1                                 | 0.1          | 0.1          | 0.0                                 | 0.0          | 0.1          |
| Pulses & products        | 3.1                                 | 3.7          | 3.1          | 2.1                                 | 2.7          | 2.1          |
| Milk & products          | 8.5                                 | 8.6          | 9.1          | 7.9                                 | 7.8          | 7.8          |
| Edible oil               | 4.6                                 | 3.7          | 3.8          | 3.5                                 | 2.6          | 2.7          |
| Egg fish & meat          | 3.3                                 | 3.5          | 3.6          | 2.7                                 | 2.7          | 2.8          |
| Vegetables               | 6.1                                 | 6.2          | 4.8          | 4.5                                 | 4.3          | 3.4          |
| Fruits & nuts            | 1.9                                 | 1.6          | 1.9          | 2.2                                 | 2.1          | 2.3          |
| Sugar                    | 2.4                                 | 2.4          | 1.8          | 1.5                                 | 1.5          | 1.2          |
| Salt & spices            | 2.5                                 | 2.4          | 2.4          | 1.7                                 | 1.5          | 1.7          |
| Beverages, etc.          | 4.5                                 | 5.6          | 5.8          | 6.2                                 | 6.3          | 7.1          |
| <b>Food Total</b>        | <b>55.0</b>                         | <b>53.6</b>  | <b>48.6</b>  | <b>42.5</b>                         | <b>40.7</b>  | <b>38.6</b>  |
| Pan, tobacco, intox.     | 2.7                                 | 2.2          | 2.4          | 1.6                                 | 1.2          | 1.4          |
| Fuel & light             | 10.2                                | 9.5          | 9.2          | 9.9                                 | 8.0          | 7.6          |
| Clothing & bedding       | 4.5                                 | 4.9          | 6.3          | 4.0                                 | 4.7          | 5.3          |
| Footwear                 | 0.8                                 | 1.0          | 1.3          | 0.7                                 | 0.9          | 1.2          |
| Misc. & services         | 23.4                                | 24.0         | 26.1         | 37.2                                | 37.8         | 39.7         |
| Durable goods            | 3.4                                 | 4.8          | 6.1          | 4.1                                 | 6.7          | 6.3          |
| <b>Non-food Total</b>    | <b>45.0</b>                         | <b>46.4</b>  | <b>51.4</b>  | <b>57.5</b>                         | <b>59.3</b>  | <b>61.5</b>  |
| <b>Total expenditure</b> | <b>100.0</b>                        | <b>100.0</b> | <b>100.0</b> | <b>100.0</b>                        | <b>100.0</b> | <b>100.0</b> |

Note: Figures may not tally due to rounding off

Source: NSSO, M/O Statistics & Programme Implementation, Key Indicators of Household Consumer Expenditure NSSO 68th Round Survey (July'11 - June'12)

**Table 10.4: Index of Terms of Trade between Agriculture and Non-Agricultural sectors**

(Base: Triennium Ending 2011-12=100)

| Year       | Index of Prices Received for |                        |                          | Index of Prices Paid for Final Consumption for |                        |                          | Index of Prices Paid for          |                            | Combined Index for Prices Paid (IPP) | Index of Terms of Trade (ITT) |
|------------|------------------------------|------------------------|--------------------------|------------------------------------------------|------------------------|--------------------------|-----------------------------------|----------------------------|--------------------------------------|-------------------------------|
|            | Farmers                      | Agricultural Labourers | Index of Prices Received | Farmers                                        | Agricultural Labourers | Combined Index for Final | Intermediate Consumption (IPP-IC) | Capital Formation (IPP-CF) |                                      |                               |
| Weight→    | 94.04                        | 5.96                   | 100.00                   | 71.35                                          | 28.65                  | 55.38                    | 25.62                             | 19.00                      | 100.00                               | Col-4/10*100                  |
| (1)        | (2)                          | (3)                    | (4)                      | (5)                                            | (6)                    | (7)                      | (8)                               | (9)                        | (10)                                 | (11)                          |
| 2004-05    | 62.35                        | 49.07                  | 61.56                    | 80.09                                          | 76.40                  | 79.03                    | 69.58                             | 73.06                      | 75.48                                | 81.56                         |
| 2005-06    | 61.40                        | 55.22                  | 61.03                    | 80.25                                          | 77.01                  | 79.32                    | 71.69                             | 74.53                      | 76.46                                | 79.82                         |
| 2006-07    | 63.97                        | 58.29                  | 63.63                    | 77.62                                          | 75.05                  | 76.88                    | 75.55                             | 78.37                      | 76.82                                | 82.82                         |
| 2007-08    | 72.06                        | 61.83                  | 71.45                    | 82.85                                          | 82.10                  | 82.63                    | 80.51                             | 84.11                      | 82.37                                | 86.74                         |
| 2008-09    | 82.06                        | 76.28                  | 81.72                    | 85.63                                          | 84.55                  | 85.32                    | 87.09                             | 92.10                      | 87.06                                | 93.86                         |
| 2009-10    | 90.89                        | 85.61                  | 90.57                    | 91.70                                          | 91.40                  | 91.62                    | 92.67                             | 92.71                      | 92.10                                | 98.35                         |
| 2010-11    | 101.29                       | 98.17                  | 101.10                   | 97.31                                          | 97.47                  | 97.36                    | 99.42                             | 99.33                      | 98.26                                | 102.89                        |
| 2011-12    | 107.82                       | 116.22                 | 108.32                   | 110.98                                         | 111.14                 | 111.03                   | 107.91                            | 107.96                     | 109.64                               | 98.79                         |
| 2012-13    | 119.49                       | 133.83                 | 120.34                   | 119.99                                         | 118.76                 | 119.64                   | 121.44                            | 115.21                     | 119.26                               | 100.91                        |
| 2013-14    | 131.67                       | 151.40                 | 132.85                   | 128.36                                         | 129.25                 | 128.62                   | 132.30                            | 117.84                     | 127.51                               | 104.19                        |
| 2014-15    | 138.21                       | 179.32                 | 140.66                   | 132.49                                         | 133.48                 | 132.77                   | 135.30                            | 122.70                     | 131.51                               | 106.96                        |
| 2015-16    | 142.78                       | 185.04                 | 145.30                   | 139.46                                         | 141.16                 | 139.94                   | 138.33                            | 121.90                     | 136.10                               | 106.76                        |
| 2016-17(P) | 151.46                       | 197.32                 | 154.19                   | 127.34                                         | 126.92                 | 127.22                   | 143.42                            | 122.67                     | 130.50                               | 118.15                        |

\* Provisional

Source: Directorate of Economics and Statistics, DAC&FW

**Table 10.5: Index of Terms of Trade between Farmers and Non-Farmers**

(Base: Triennium Ending 2011-12=100)

| Year       | Index of Prices Received (IPR) | Index of Price Paid (IPP) for |                                   |                            |                      | Index of Terms of Trade (ITT) |
|------------|--------------------------------|-------------------------------|-----------------------------------|----------------------------|----------------------|-------------------------------|
|            |                                | Final Consumption (IPP-FC)    | Intermediate Consumption (IPP-IC) | Capital Formation (IPP-CF) | Combined Index (IPP) |                               |
| Weight→    |                                | 38.19                         | 43.44                             | 18.37                      | 100.00               | (Col-2/6*100)                 |
| (1)        | (2)                            | (3)                           | (4)                               | (5)                        | (6)                  | (7)                           |
| 2004-05    | 62.35                          | 80.09                         | 62.12                             | 73.06                      | 70.99                | 87.82                         |
| 2005-06    | 61.40                          | 80.25                         | 64.60                             | 74.53                      | 72.40                | 84.80                         |
| 2006-07    | 63.97                          | 77.62                         | 67.75                             | 78.37                      | 73.47                | 87.06                         |
| 2007-08    | 72.06                          | 82.85                         | 71.52                             | 84.11                      | 78.16                | 92.20                         |
| 2008-09    | 82.06                          | 85.63                         | 74.72                             | 92.10                      | 82.08                | 99.98                         |
| 2009-10    | 90.89                          | 91.70                         | 89.09                             | 92.71                      | 90.75                | 100.15                        |
| 2010-11    | 101.29                         | 97.31                         | 98.94                             | 99.33                      | 98.39                | 102.95                        |
| 2011-12    | 107.82                         | 110.98                        | 111.98                            | 107.96                     | 110.86               | 97.26                         |
| 2012-13    | 119.49                         | 119.99                        | 128.36                            | 115.21                     | 122.75               | 97.34                         |
| 2013-14    | 131.67                         | 128.36                        | 145.19                            | 117.84                     | 133.74               | 98.46                         |
| 2014-15    | 138.21                         | 132.49                        | 157.70                            | 122.70                     | 141.64               | 97.58                         |
| 2015-16    | 142.78                         | 139.46                        | 164.85                            | 121.90                     | 147.26               | 96.96                         |
| 2016-17(P) | 151.46                         | 127.34                        | 171.57                            | 122.67                     | 145.69               | 103.96                        |

(P): Provisional

Source: Directorate of Economics and Statistics, DAC&amp;FW



# KEY INDICATORS OF SITUATION OF AGRICULTURAL HOUSEHOLDS IN INDIA

**Table 11.1: Estimated Number of Rural Households, Agricultural Households and Indebted Agricultural Households**

| State             | Estimated Number of Rural Households ('00) | Estimated Number of Agricultural Households ('00) | Agricultural Households as percentage of rural households (%) | Estimated Number of Agricultural Households having loan ('00) | % of Agricultural Households indebted |
|-------------------|--------------------------------------------|---------------------------------------------------|---------------------------------------------------------------|---------------------------------------------------------------|---------------------------------------|
| (1)               | (2)                                        | (3)                                               | (4)                                                           | (5)                                                           | (6)                                   |
| Andhra Pradesh*   | 86763                                      | 35968                                             | 41.5                                                          | 33421                                                         | 92.9                                  |
| Arunachal Pradesh | 1659                                       | 1080                                              | 65.1                                                          | 206                                                           | 19.1                                  |
| Assam             | 52494                                      | 34230                                             | 65.2                                                          | 5995                                                          | 17.5                                  |
| Bihar             | 140611                                     | 70943                                             | 50.5                                                          | 30156                                                         | 42.5                                  |
| Chhattisgarh      | 37472                                      | 25608                                             | 68.3                                                          | 9538                                                          | 37.2                                  |
| Gujarat           | 58719                                      | 39305                                             | 66.9                                                          | 16743                                                         | 42.6                                  |
| Haryana           | 25849                                      | 15693                                             | 60.7                                                          | 6645                                                          | 42.3                                  |
| Himachal Pradesh  | 13251                                      | 8811                                              | 66.5                                                          | 2457                                                          | 27.9                                  |
| Jammu & Kashmir   | 13746                                      | 11283                                             | 82.1                                                          | 3463                                                          | 30.7                                  |
| Jharkhand         | 37516                                      | 22336                                             | 59.5                                                          | 6464                                                          | 28.9                                  |
| Karnataka         | 77430                                      | 42421                                             | 54.8                                                          | 32775                                                         | 77.3                                  |
| Kerala            | 51377                                      | 14043                                             | 27.3                                                          | 10908                                                         | 77.7                                  |
| Madhya Pradesh    | 84666                                      | 59950                                             | 70.8                                                          | 27414                                                         | 45.7                                  |
| Maharashtra       | 125182                                     | 70970                                             | 56.7                                                          | 40672                                                         | 57.3                                  |
| Manipur           | 2584                                       | 1762                                              | 68.2                                                          | 421                                                           | 23.9                                  |
| Meghalaya         | 4721                                       | 3544                                              | 75.1                                                          | 84                                                            | 2.4                                   |
| Mizoram           | 936                                        | 758                                               | 81.0                                                          | 47                                                            | 6.2                                   |
| Nagaland          | 4128                                       | 2621                                              | 63.5                                                          | 65                                                            | 2.5                                   |
| Odisha            | 78120                                      | 44935                                             | 57.5                                                          | 25830                                                         | 57.5                                  |
| Punjab            | 27552                                      | 14083                                             | 51.1                                                          | 7499                                                          | 53.2                                  |
| Rajasthan         | 82722                                      | 64835                                             | 78.4                                                          | 40055                                                         | 61.8                                  |
| Sikkim            | 1150                                       | 674                                               | 58.6                                                          | 97                                                            | 14.4                                  |
| Tamil Nadu        | 93607                                      | 32443                                             | 34.7                                                          | 26780                                                         | 82.5                                  |
| Telangana*        | 49309                                      | 25389                                             | 51.5                                                          | 22628                                                         | 89.1                                  |
| Tripura           | 6635                                       | 2445                                              | 36.9                                                          | 559                                                           | 22.9                                  |
| Uttar Pradesh     | 241328                                     | 180486                                            | 74.8                                                          | 79081                                                         | 43.8                                  |
| Uttanchal         | 16498                                      | 10608                                             | 64.3                                                          | 5387                                                          | 50.8                                  |
| West Bengal       | 141359                                     | 63624                                             | 45.0                                                          | 32787                                                         | 51.5                                  |
| UTs               | 2394                                       | 718                                               | 30.0                                                          | 267                                                           | 37.2                                  |
| <b>All India</b>  | <b>1561442</b>                             | <b>902011</b>                                     | <b>57.8</b>                                                   | <b>468481</b>                                                 | <b>51.9</b>                           |

Source: Situation Assessment Survey of Agricultural Households (Jan-Dec 2013), National Sample Survey Office (NSSO)

\* Separate estimates for the newly formed States of Telangana and Andhra Pradesh are provided in place of erstwhile State of Andhra Pradesh

Note;1 Reference period for Indebtedness is "as on the date of survey"

2 Indebtedness relates to all kind of outstanding loans irrespective of the purpose for which taken

**Table 11.2: Indebtedness of Agricultural Households (all-India) in Different Size Classes of Land Possessed**

| Land Possessed (hectare) | Estimated Number of Agricultural Households (lakh) | % to Total in each Class | Estimated No. of Indebted Agricultural Households (lakh) | % to Total in each Class | % of Indebted Agricultural Households to Total | Average Outstanding Loan Amount (₹) |
|--------------------------|----------------------------------------------------|--------------------------|----------------------------------------------------------|--------------------------|------------------------------------------------|-------------------------------------|
| (1)                      | (2)                                                | (3)                      | (4)                                                      | (5)                      | (6)                                            | (7)                                 |
| < 0.01                   | 23.89                                              | 2.65                     | 10.02                                                    | 2.1                      | 41.9                                           | 31100                               |
| 0.01-0.40                | 287.66                                             | 31.89                    | 135.97                                                   | 29.0                     | 47.3                                           | 23900                               |
| 0.41-1.00                | 314.81                                             | 34.90                    | 152.16                                                   | 32.5                     | 48.3                                           | 35400                               |
| 1.01-2.00                | 154.58                                             | 17.14                    | 86.11                                                    | 18.4                     | 55.7                                           | 54800                               |
| 2.01-4.00                | 84.35                                              | 9.35                     | 56.10                                                    | 12.0                     | 66.5                                           | 94900                               |
| 4.01-10.00               | 33.02                                              | 3.66                     | 25.21                                                    | 5.4                      | 76.3                                           | 182700                              |
| 10 & above               | 3.71                                               | 0.41                     | 2.92                                                     | 0.6                      | 78.7                                           | 290300                              |
| <b>All India</b>         | <b>902.01</b>                                      | <b>100.00</b>            | <b>468.48</b>                                            | <b>100.0</b>             | <b>51.9</b>                                    | <b>47000</b>                        |

Source: Situation Assessment Survey of Agricultural Households (Jan-Dec 2013), National Sample Survey Office (NSSO)

Note:1 Reference period for land possession and Indebtedness is "as on the date of survey"

2 Indebtedness relates to all kind of outstanding loans irrespective of the purpose for which taken

**Table 11.3: Incidence of Indebtedness in Major States**

| State                | Estimated Number of Indebted Agricultural Households | % to Total Indebted Agricultural Households | % Share in Total Foodgrains (2016-17)* |               |
|----------------------|------------------------------------------------------|---------------------------------------------|----------------------------------------|---------------|
|                      |                                                      |                                             | Area                                   | Production    |
| (1)                  | (2)                                                  | (3)                                         | (4)                                    | (5)           |
| 1. Uttar Pradesh     | 79081                                                | 16.9                                        | 15.56                                  | 17.83         |
| 2. Maharashtra       | 40672                                                | 8.7                                         | 9.50                                   | 5.73          |
| 3. Rajasthan         | 40055                                                | 8.5                                         | 11.02                                  | 7.00          |
| 4. Andhra Pradesh**  | 33421                                                | 7.1                                         | 3.10                                   | 3.76          |
| 5. West Bengal       | 32787                                                | 7.0                                         | 4.67                                   | 6.19          |
| 6. Karnataka         | 32775                                                | 7.0                                         | 5.69                                   | 3.50          |
| 7. Bihar             | 30156                                                | 6.4                                         | 5.17                                   | 5.65          |
| 8. Madhya Pradesh    | 27414                                                | 5.9                                         | 13.3                                   | 11.96         |
| 9. Odisha            | 25830                                                | 5.5                                         | 3.75                                   | 3.29          |
| 10. Telangana**      | 22628                                                | 4.8                                         | 2.57                                   | 3.03          |
| 11. Punjab           | 7499                                                 | 1.6                                         | 5.02                                   | 10.15         |
| 12. Other States/UTs | 96163                                                | 20.5                                        | 20.65                                  | 21.91         |
| <b>All India</b>     | <b>468481</b>                                        | <b>100.0</b>                                | <b>100.00</b>                          | <b>100.00</b> |

\* As per the Fourth Advance Estimates

\*\*Separate estimates for the newly formed States of Telangana and Andhra Pradesh are provided in place of erstwhile State of Andhra Pradesh

Note: Reference period for Indebtedness is "as on the date of survey"

Source: Situation Assessment Survey of Agricultural Households (Jan-Dec 2013), National Sample Survey Office(NSSO) for Col-2 and 3 and Directorate of Economics & Statistics for Col-4 and 5

**Table 11.4: Incidence of Indebtedness based on size of land possessed**

| State              | % of Marginal Indebted Agricultural Households<br>(upto 1.0 ha of land) | % of Small Indebted Agricultural Households<br>(1.01 to 2.00 ha) | % of Semi-Medium Indebted Agricultural Households<br>(2.01 to 4.00 ha) | % of Medium Indebted Agricultural Households<br>(4.01 to 10.00 ha) | % of Large Indebted Agricultural Households<br>(>10.00 ha) |
|--------------------|-------------------------------------------------------------------------|------------------------------------------------------------------|------------------------------------------------------------------------|--------------------------------------------------------------------|------------------------------------------------------------|
| (1)                | (2)                                                                     | (3)                                                              | (4)                                                                    | (5)                                                                | (6)                                                        |
| 1. Uttar Pradesh   | 77.2                                                                    | 13.4                                                             | 7.1                                                                    | 2.1                                                                | 0.2                                                        |
| 2. Maharashtra     | 35.6                                                                    | 29.3                                                             | 22.8                                                                   | 11.6                                                               | 0.7                                                        |
| 3. Madhya Pradesh  | 42.3                                                                    | 27.4                                                             | 21.4                                                                   | 7.5                                                                | 1.3                                                        |
| 4. Rajasthan       | 50.9                                                                    | 18.3                                                             | 16.8                                                                   | 12.1                                                               | 1.9                                                        |
| 5. Karnataka       | 52                                                                      | 24.4                                                             | 14.8                                                                   | 7.4                                                                | 1.3                                                        |
| 6. Andhra Pradesh* | 52.2                                                                    | 23.9                                                             | 16.1                                                                   | 6.9                                                                | 0.9                                                        |
| 7. Telangana*      | 51                                                                      | 23.6                                                             | 19.6                                                                   | 5                                                                  | 0.9                                                        |
| 8. Bihar           | 86.7                                                                    | 10                                                               | 2.6                                                                    | 0.7                                                                | 0                                                          |
| 9. West Bengal     | 91.1                                                                    | 7.4                                                              | 1.4                                                                    | 0.1                                                                | 0                                                          |
| 10. Punjab         | 46.2                                                                    | 15.9                                                             | 17.9                                                                   | 17.6                                                               | 2.4                                                        |
| 11. Odisha         | 78.7                                                                    | 15.2                                                             | 4.3                                                                    | 1.8                                                                | 0.1                                                        |
| <b>All India</b>   | <b>63.6</b>                                                             | <b>18.4</b>                                                      | <b>12</b>                                                              | <b>5.4</b>                                                         | <b>0.6</b>                                                 |

\*Separate estimates for the newly formed States of Telangana and Andhra Pradesh are provided in place of erstwhile State of Andhra Pradesh

Note:1 Reference period for land possession and Indebtedness is "as on the date of survey"

2 Indebtedness relates to all kind of outstanding loans irrespective of the purpose for which taken

Source: Situation Assessment Survey of Agricultural Households (Jan-Dec 2013), National Sample Survey Office (NSSO)

**Chart 11 (a): Distribution of Agricultural Households over Social Groups**

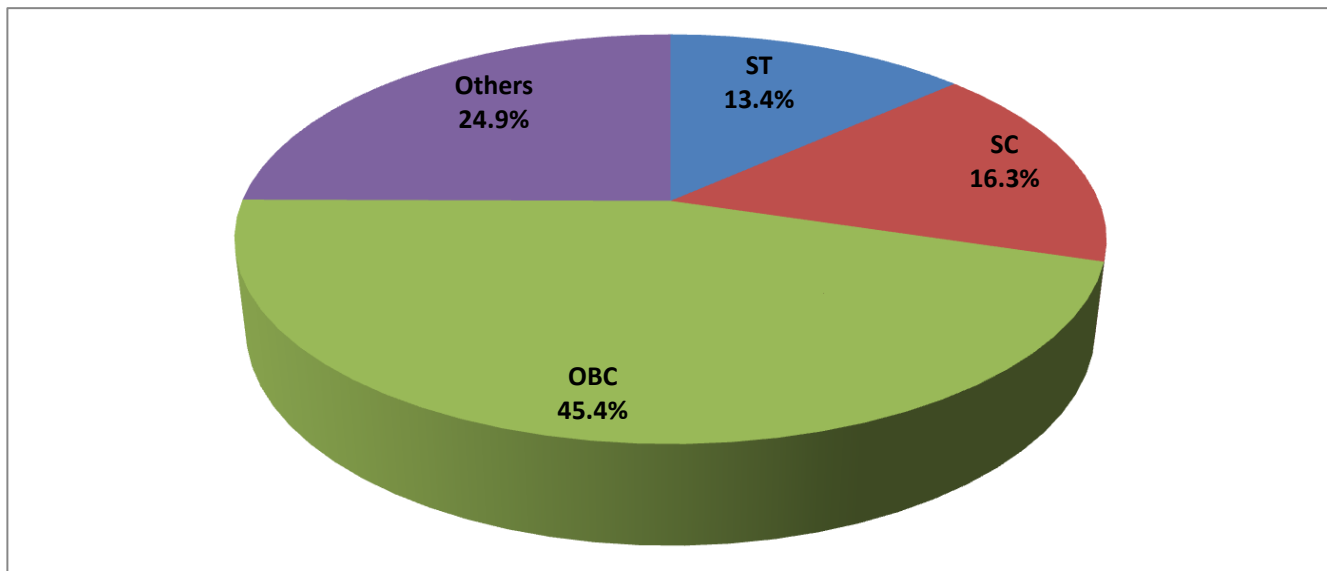

Source: Situation Assessment Survey of Agricultural Households (Jan-Dec 2013), National Sample Survey Office (NSSO)

**Chart 11 (b): Distribution of Agricultural Households by principal source of income**

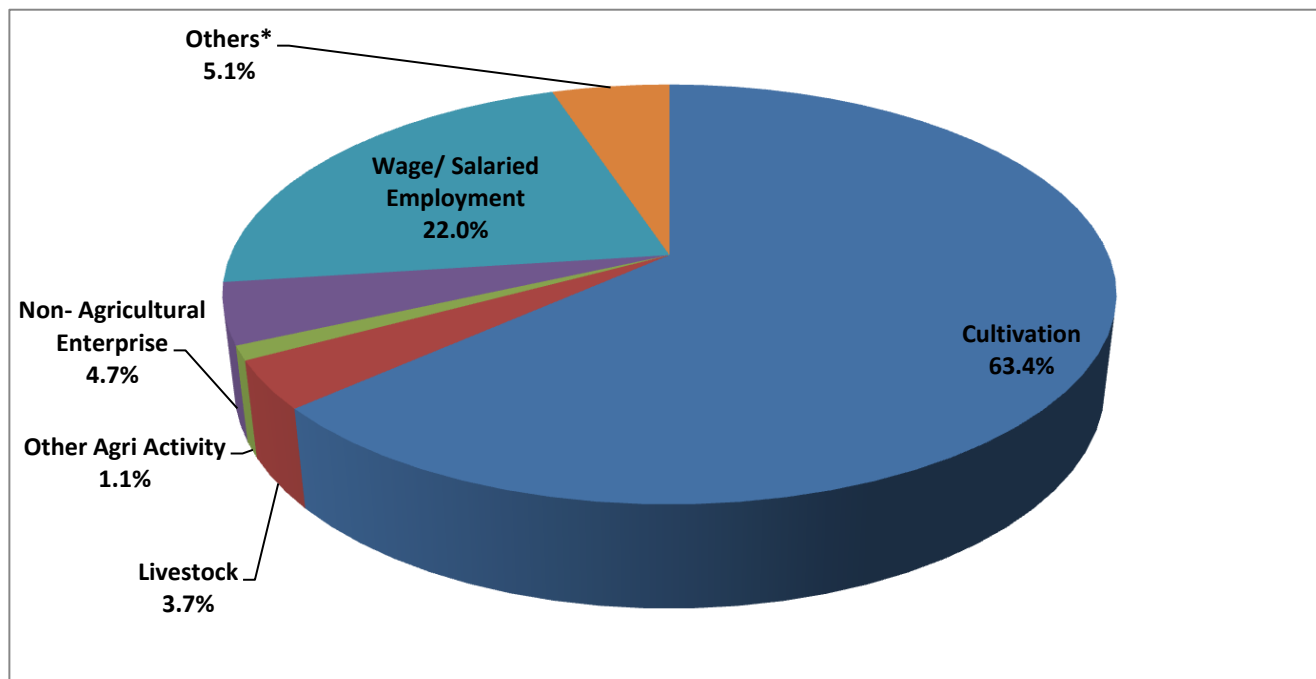

\* Others include pension and remittance also

Source: Situation Assessment Survey of Agricultural Households (Jan-Dec 2013), National Sample Survey Office (NSSO)

**Table 11.5: Average Monthly Expenses and Receipts for Crop Production per Agricultural Household for Major States during July 2012- June 2013**

| State            | Average Total Expenses (Rs.) | Average Total Receipts (Rs.) | No. per 1000 households engaged in crop production | Estimated No. of Households engaged in Crop Production (00) |
|------------------|------------------------------|------------------------------|----------------------------------------------------|-------------------------------------------------------------|
| (1)              | (2)                          | (3)                          | (4)                                                | (5)                                                         |
| Andhra Pradesh   | 6191                         | 8482                         | 883                                                | 31747                                                       |
| Assam            | 788                          | 5197                         | 955                                                | 32689                                                       |
| Bihar            | 1454                         | 3358                         | 900                                                | 63872                                                       |
| Chhattisgarh     | 1128                         | 4551                         | 978                                                | 25035                                                       |
| Gujarat          | 2250                         | 5773                         | 832                                                | 32787                                                       |
| Haryana          | 6228                         | 17144                        | 721                                                | 11310                                                       |
| Jharkhand        | 571                          | 2049                         | 982                                                | 21939                                                       |
| Karnataka        | 2779                         | 7908                         | 961                                                | 40770                                                       |
| Kerala           | 2270                         | 5872                         | 980                                                | 13765                                                       |
| Madhya Pradesh   | 2284                         | 6538                         | 944                                                | 56604                                                       |
| Maharashtra      | 2654                         | 6675                         | 959                                                | 68051                                                       |
| Odisha           | 1001                         | 2438                         | 979                                                | 43999                                                       |
| Punjab           | 11768                        | 28117                        | 664                                                | 9357                                                        |
| Rajasthan        | 1730                         | 5192                         | 906                                                | 58705                                                       |
| Tamil Nadu       | 2538                         | 5012                         | 775                                                | 25148                                                       |
| Telangana        | 4267                         | 8666                         | 961                                                | 24397                                                       |
| Uttar Pradesh    | 1790                         | 4912                         | 914                                                | 165029                                                      |
| West Bengal      | 1819                         | 2836                         | 962                                                | 61206                                                       |
| <b>All India</b> | <b>2192</b>                  | <b>5542</b>                  | <b>920</b>                                         | <b>829485</b>                                               |

Source: Situation Assessment Survey of Agricultural Households (Jan-Dec 2013), National Sample Survey Office (NSSO)

**Table 11.6: Average Monthly Expenses and Receipts from Farming of Animals per Agricultural Household for Major States during July 2012- June 13**

| State            | Average Total Expenses (Rs.) | Average Total Receipts (Rs.) | No. per 1000 households engaged in farming of animals | Estimated No. of Households engaged in farming of animals ('00) |
|------------------|------------------------------|------------------------------|-------------------------------------------------------|-----------------------------------------------------------------|
| (1)              | (2)                          | (3)                          | (4)                                                   | (5)                                                             |
| Andhra Pradesh   | 1405                         | 3619                         | 486                                                   | 17478                                                           |
| Assam            | 627                          | 1890                         | 633                                                   | 21661                                                           |
| Bihar            | 1324                         | 1810                         | 574                                                   | 40743                                                           |
| Chhattisgarh     | 491                          | 426                          | 298                                                   | 7624                                                            |
| Gujarat          | 2399                         | 4874                         | 780                                                   | 30726                                                           |
| Haryana          | 3256                         | 6089                         | 933                                                   | 14649                                                           |
| Jharkhand        | 283                          | 2420                         | 558                                                   | 12478                                                           |
| Karnataka        | 1524                         | 2485                         | 624                                                   | 26452                                                           |
| Kerala           | 2249                         | 3356                         | 519                                                   | 7288                                                            |
| Madhya Pradesh   | 914                          | 2210                         | 565                                                   | 33881                                                           |
| Maharashtra      | 2118                         | 3039                         | 586                                                   | 41572                                                           |
| Odisha           | 501                          | 2919                         | 544                                                   | 24432                                                           |
| Punjab           | 3561                         | 5303                         | 952                                                   | 13412                                                           |
| Rajasthan        | 1868                         | 3131                         | 766                                                   | 49626                                                           |
| Tamil Nadu       | 1370                         | 3196                         | 603                                                   | 19556                                                           |
| Telangana        | 1044                         | 1994                         | 394                                                   | 9995                                                            |
| Uttar Pradesh    | 1068                         | 1845                         | 699                                                   | 126168                                                          |
| West Bengal      | 916                          | 1261                         | 652                                                   | 41506                                                           |
| <b>All India</b> | <b>1388</b>                  | <b>2604</b>                  | <b>627</b>                                            | <b>565620</b>                                                   |

Source: Situation Assessment Survey of Agricultural Households (Jan-Dec 2013), National Sample Survey Office (NSSO)



# AGRICULTURAL PROJECTIONS

**Table 12.1: Projected Demand and Supply of Food Commodities for the 12th Plan period**

(Million tonnes)

| Crop/Group of Crops      | Projected Demand |         | Projected Supply | Actual Production |         |
|--------------------------|------------------|---------|------------------|-------------------|---------|
|                          | 2016-17          | 2020-21 | 2016-17          | 2006-07           | 2011-12 |
| (1)                      | (2)              | (3)     | (4)              | (5)               | (6)     |
| Rice                     | 110              | 117     | 98-106           | 93                | 104*    |
| Wheat                    | 89               | 98      | 93-104           | 76                | 94*     |
| Maize                    | 19               | 22      |                  | 15                | 22*     |
| Nutri Cereals            | 36               | 38      | 42-48            | 34                | 42*     |
| Cereals                  | 235              | 253     | 240-251          | 203               | 240*    |
| Pulses                   | 22               | 25      | 18-21            | 14                | 17*     |
| Foodgrains               | 257              | 277     | 258-272          | 217               | 257*    |
| Oilseeds/Edible oils     | 59               | 71      | 33-41            | 24                | 30*     |
| Sugarcane/Sugar          | 279              | 312     | 365-411          | 355               | 358*    |
| Vegetables               | 161              | 189     |                  | 116               | 147**   |
| Fruits                   | 97               | 124     |                  | 59                | 75**    |
| Milk                     | 141              | 173     |                  | 103               | 122**   |
| Fish                     | 11               |         |                  | 6.9               | 8.3**   |
| Meat, other than poultry | 3.7              | 5.0     |                  | 2.3               | 2.7**   |
| Poultry Meat             | 3.3              | 4.3     |                  |                   | 2.2 @   |

\*4th advance estimate for 2011-12; \*\*Production for the year 2010-11; @ Production 2010-11 for only commercial poultry meat.

Source: 12<sup>th</sup> Plan Document, Planning Commission

**Table 12.2: Average Annual Growth Rate of Production of Selected Food Commodities in India: Actual Production Trends in 2005–15 and Projections by various agencies**

| Crops          | Actual Growth rate | FAO/ OECD | USDA | FAPRI | IGC  | NCAER                   |                          |
|----------------|--------------------|-----------|------|-------|------|-------------------------|--------------------------|
|                |                    |           |      |       |      | India stand-alone Model | Econometric Cosimo Model |
|                |                    |           |      |       |      | 2016-25                 | 2016-24                  |
| (1)            | (2)                | (3)       | (4)  | (5)   | (6)  | (7)                     | (8)                      |
| Wheat          | 3.21               | 1.4       | 1.78 | 1.3   | 2.05 | 1.69                    | 0.96-1.73                |
| Rice           | 1.52               | 1.76      | 1.19 | NA    | 1.76 | 1.88                    | 2.46-2.75                |
| Nutri Cereals  | -0.93              | 2.70      | 2.16 | 0.49  | 1.27 | 1.78                    | -0.41-3.30               |
| Pulses         | 3.19               |           |      |       |      |                         | 2.74-3.21                |
| Total Oilseeds | 0.81               | 2.21      | 3.72 | 1.47  | 2.66 |                         | 3.47-4.29                |
| Vegetable Oil  | -0.93              | 2.05      | 4.20 | 1.48  | NA   | 1.88                    |                          |
| Sugar          | 2.64               | 0.32      | NA   | 3.24  | NA   | 3.31                    |                          |
| Egg            | 4.44               |           |      |       |      | 3.66                    |                          |
| Milk           | 1.9                |           |      |       |      | 2.15                    |                          |
| Poultry        | 5.39               |           |      |       |      | 3.12                    |                          |

Source: Agricultural Outlook & Situation Analysis Report (Fifth Medium-term Agricultural Outlook Report), July 2016, NCAER

**Table 12.3: Production, Consumption & Year-end Stocks Projections of Major Crops**

('000 Tonnes)

| Commodity       | Agency   | Production |         |         | Consumption |         |         | Stocks (Year-end) |        |        |
|-----------------|----------|------------|---------|---------|-------------|---------|---------|-------------------|--------|--------|
|                 |          | 2014       | 2020    | 2024    | 2014        | 2020    | 2024    | 2014              | 2020   | 2024   |
| (1)             | (2)      | (3)        | (4)     | (5)     | (6)         | (7)     | (8)     | (9)               | (10)   | (11)   |
| <b>Wheat</b>    | FAO/OECD | 95,910     | 103,612 | 110,178 | 87,100      | 99,673  | 108,585 | 26,838            | 32,774 | 31,214 |
|                 | USDA     | 88,940     | 104,293 | 110,039 | 93,940      | 103,418 | 108,945 | 11,900            | 9,426  | 10,930 |
| <b>Rice</b>     | FAO/OECD | 104,800    | 114,898 | 122,637 | 98,750      | 108,700 | 115,287 | 20,000            | 15,980 | 14,979 |
|                 | USDA     | 104,800    | 112,446 | 117,078 | 98,097      | 102,751 | 105,953 | 17,660            | 11,062 | 13,109 |
| <b>Maize</b>    | USDA     | 482 083    | 482 580 | 499 861 | 463 665     | 487 989 | 506 352 | 74 965            | 67 248 | 71 713 |
| <b>Soy Bean</b> | USDA     | 1,255      | 1,869   | 2,012   | 4,049       | 5,187   | 5,781   | 260               | 250.1  | 247.4  |
| <b>Sugar</b>    | FAO/OECD | 26,300     | 25,978  | 27,430  | 25,525      | 28,691  | 31,284  | 12,138            | 11,447 | 13,935 |

Source: Agricultural Outlook & Situation Analysis Report (Fifth Medium-term Agricultural Outlook Report), July 2016, NCAER

**Table 12.4: Production Projections of Potatoes and Onion**

| Commodity     | Production               | 2013 | 2014 | 2017 | 2023 |
|---------------|--------------------------|------|------|------|------|
| (1)           | (2)                      | (3)  | (4)  | (5)  | (6)  |
| <b>Potato</b> | Production (MMT)         | 41.5 | 46.0 | 53.6 | 76.5 |
|               | India share in world (%) | 11.3 | 12.4 | 14.0 | 18.8 |
| <b>Onion</b>  | Production (MMT)         | 19.4 | 18.7 | 25.4 | 51.5 |
|               | India share in world (%) | 22.5 | 20.8 | 24.8 | 37.4 |

Note: There are no global medium-term projections for potato and onions. Projections here are made by NCAER using the Directorate of Economics and Statistics data and FAO data on global area, production and yield of these commodities (2000–2014) and applying a trend growth rate

Source: Agricultural Outlook & Situation Analysis Report, (Fifth Medium-term Agricultural Outlook Report), July 2016, NCAER

**Chart 12 (a): Projected Production of Rice, Wheat and Coarse Grains in India**

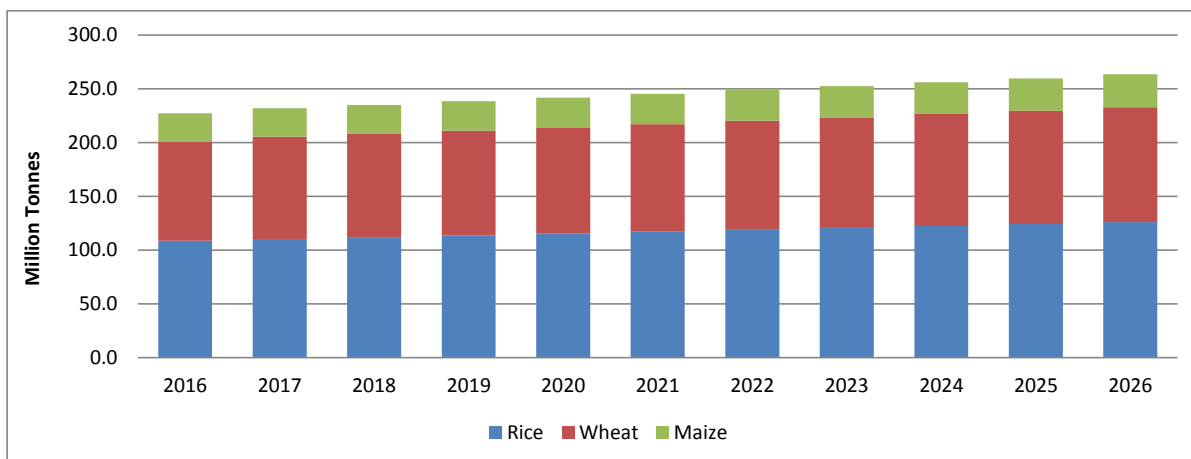

Source: OECD- FAO Agriculture Outlook (2017-2026)

**Chart 12 (b): Projected Production of Vegetables and Fruits in India**

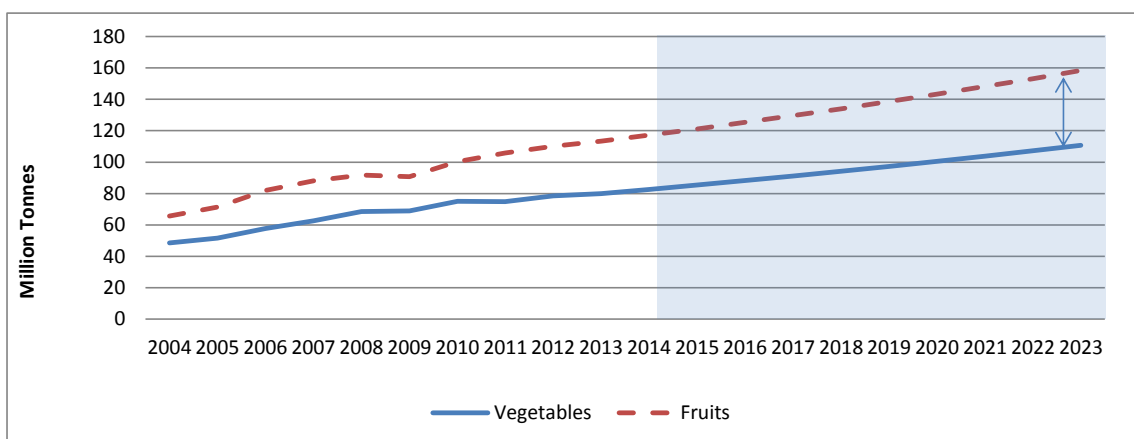

Source: OECD- FAO Agriculture Outlook (2014-2023)

**Chart 12 (c): Projected Market Support Prices in India and World Prices for Rice and Wheat**

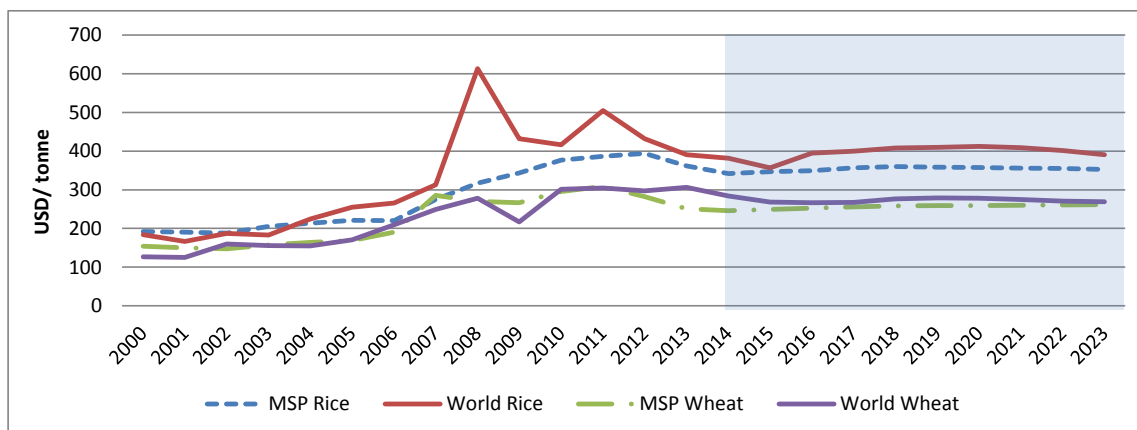

Note: Minimum Support Price (MSP) for paddy rice is adjusted to milled basis. Market Margins of 15% are added to MSP. The world reference price for wheat is US Gulf HRW, and for rice is Vietnam 5%. Source: OECD- FAO Agriculture Outlook (2014-2023)

**Chart 12 (d): Projected Per capita Consumption of Cereals in India**

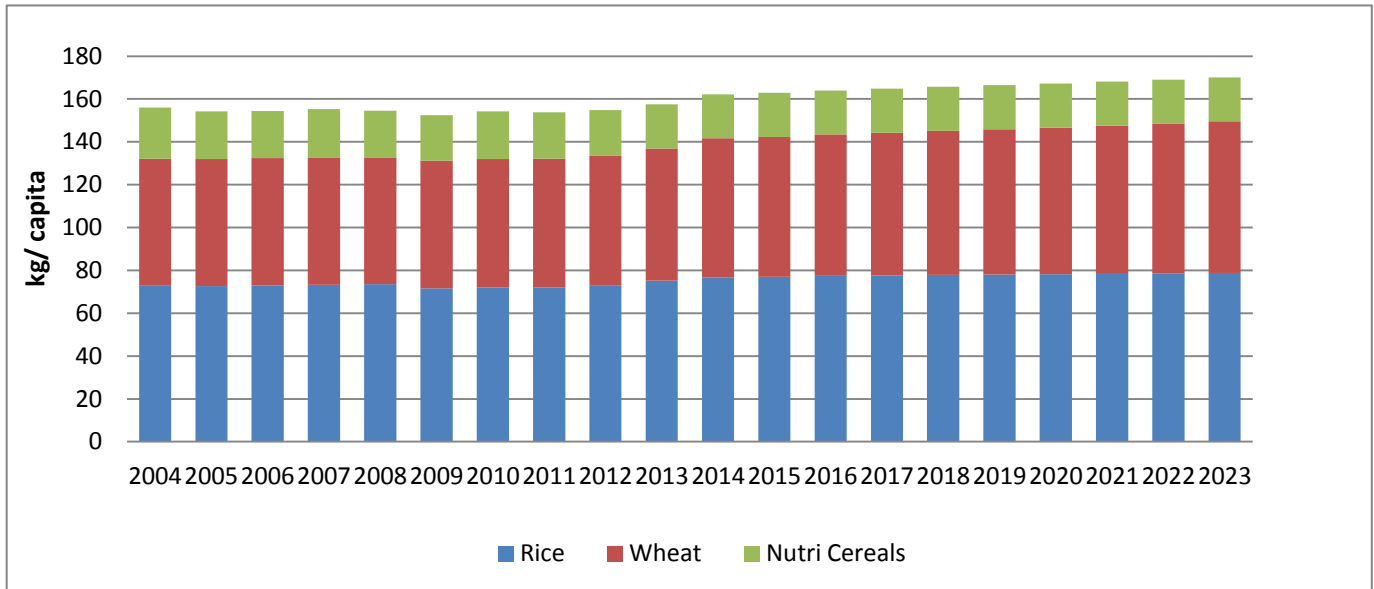

Source: OECD- FAO Agriculture Outlook (2014-2023)

**Chart 12 (e): Projected Calorie and Protein Consumption in India**

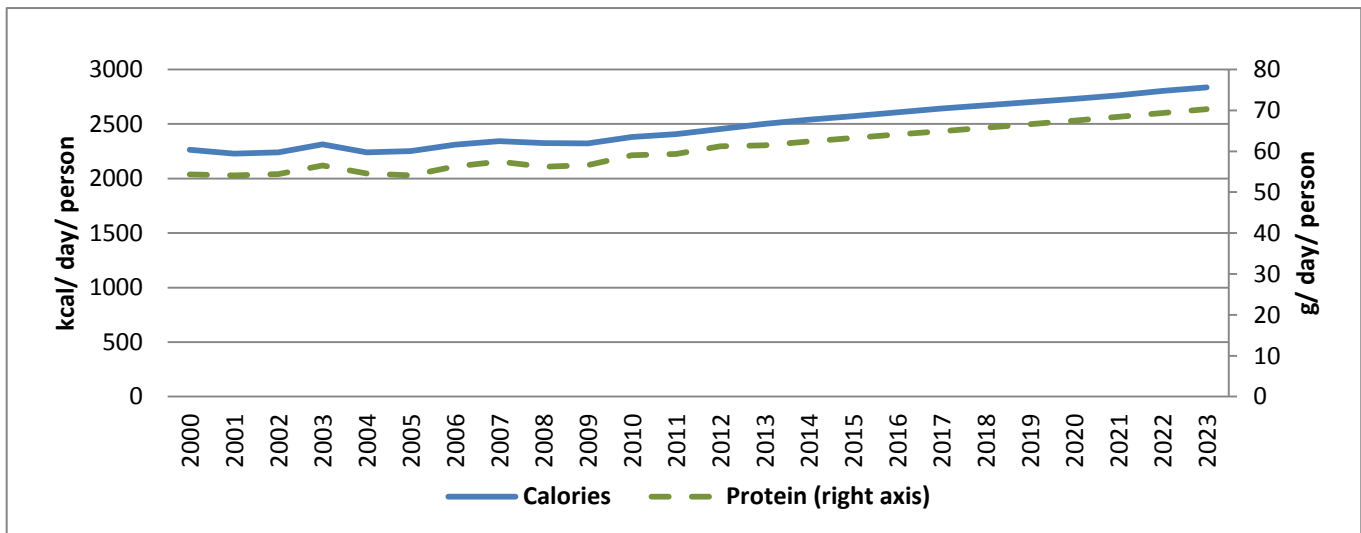

Source: OECD- FAO Agriculture Outlook (2014-2023)

# IMPORTS & EXPORTS OF AGRICULTURAL PRODUCTS

**Table 13.1: India's Imports and Exports of Agricultural Commodities**

| (Value in ₹ Crore) |                      |               |                                                           |                      |               |                                                           |
|--------------------|----------------------|---------------|-----------------------------------------------------------|----------------------|---------------|-----------------------------------------------------------|
| Year               | Agricultural Imports | Total Imports | Percentage share of Agricultural Imports in Total Imports | Agricultural Exports | Total Exports | Percentage share of Agricultural Exports in Total Exports |
| (1)                | (2)                  | (3)           | (4)                                                       | (5)                  | (6)           | (7)                                                       |
| 1990-91            | 1205.86              | 43170.82      | 2.79                                                      | 6012.76              | 32527.28      | 18.49                                                     |
| 2000-01            | 12086.23             | 228306.64     | 5.29                                                      | 28657.37             | 201356.45     | 14.23                                                     |
| 2010-11            | 51073.97             | 1683466.96    | 3.03                                                      | 113046.58            | 1136964.22    | 9.94                                                      |
| 2011-12            | 70164.51             | 2345463.24    | 2.99                                                      | 182801.00            | 1465959.31    | 12.47                                                     |
| 2012-13            | 95718.89             | 2669161.96    | 3.59                                                      | 227192.61            | 1634318.29    | 13.90                                                     |
| 2013-14            | 85727.30             | 2715433.91    | 3.16                                                      | 262778.54            | 1905011.00    | 13.79                                                     |
| 2014-15            | 121319.02            | 2737086.58    | 4.43                                                      | 239681.04            | 1896445.47    | 12.64                                                     |
| 2015-16            | 140289.22            | 2490298.08    | 5.63                                                      | 215396.55            | 1716378.05    | 12.55                                                     |
| 2016-17 (P)        | 164726.83            | 2577665.59    | 6.39                                                      | 226651.94            | 1849428.76    | 12.26                                                     |

(P) - Provisional

Note: Commodities covered under agriculture sector have been revised after inter-Departmental consultation

Source: Directorate General of Commercial Intelligence & Statistics, D/o Commerce, Kolkata.

**Chart 13 (a): Trends in Agricultural Imports/ Exports and their percentage share in Total Imports/ Exports**

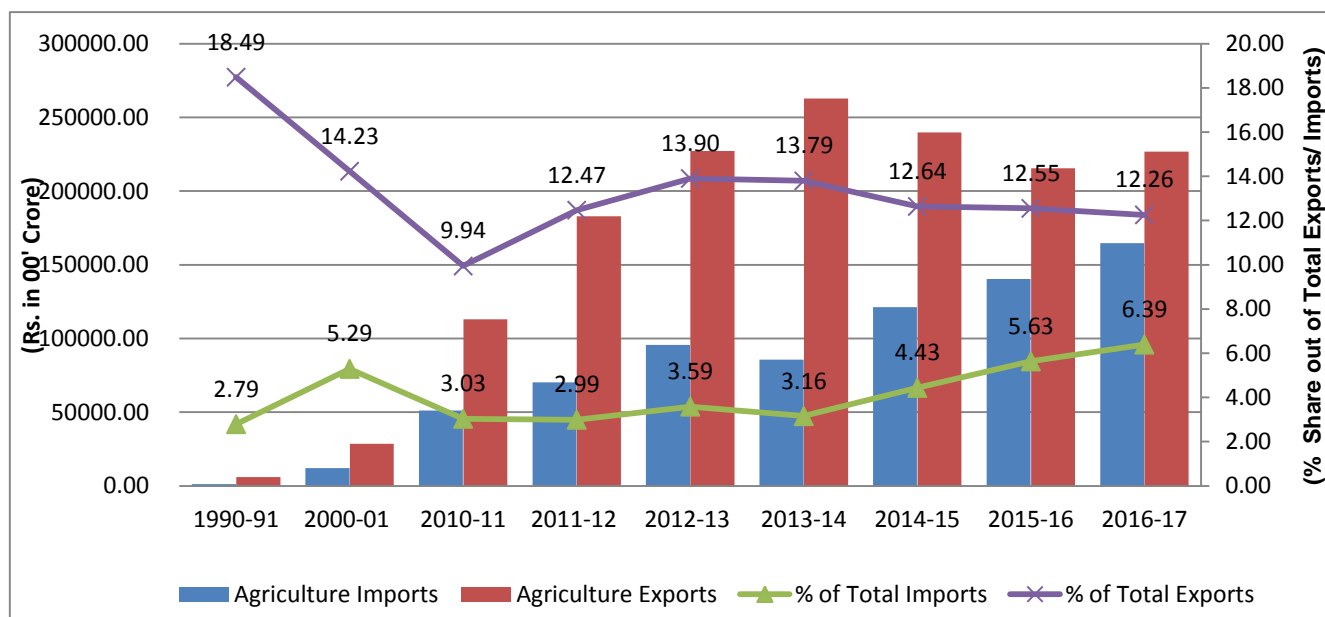

Source: Directorate General of Commercial Intelligence & Statistics, D/o Commerce, Kolkata.

**Table 13.2 : India's Imports of Agricultural Commodities**

| Commodity                                                 | (Quantity: '000 tonnes)<br>(Value in ₹ Crore) |                   |                 |                   |                 |                   |
|-----------------------------------------------------------|-----------------------------------------------|-------------------|-----------------|-------------------|-----------------|-------------------|
|                                                           | 2014-15                                       |                   | 2015-16         |                   | 2016-17 (P)     |                   |
|                                                           | Quantity<br>(2)                               | Value<br>(3)      | Quantity<br>(4) | Value<br>(5)      | Quantity<br>(6) | Value<br>(7)      |
| (1)                                                       |                                               |                   |                 |                   |                 |                   |
| Tea                                                       | 28.39                                         | 388.66            | 23.72           | 377.47            | 24.89           | 338.35            |
| Coffee                                                    | 74.88                                         | 930.47            | 65.61           | 801.83            | 78.04           | 926.81            |
| Rice- Basmati                                             | 0.00                                          | 0.00              | 0.00            | 0.00              | 0.00            | 0.00              |
| Rice(other than Basmati)                                  | 1.96                                          | 10.83             | 1.02            | 5.91              | 1.14            | 7.25              |
| Wheat                                                     | 29.49                                         | 61.34             | 517.67          | 872.59            | 5749.43         | 8509.05           |
| Other cereals                                             | 23.40                                         | 61.76             | 206.14          | 344.31            | 311.37          | 493.18            |
| Pulses                                                    | 4584.85                                       | 17062.94          | 5797.71         | 25619.06          | 6609.49         | 28523.18          |
| Tobacco unmanufactured                                    | 1.93                                          | 98.17             | 2.88            | 137.30            | 1.97            | 77.21             |
| Tobacco manufactured                                      | -                                             | 200.28            | -               | 193.92            | 0.00            | 228.54            |
| Spices                                                    | 163.09                                        | 4393.25           | 197.06          | 5399.95           | 242.29          | 5760.25           |
| Cashew                                                    | 933.19                                        | 6599.74           | 961.67          | 8701.28           | 774.51          | 9027.09           |
| Cashew nut shell liquid                                   | 1.72                                          | 10.03             | 1.86            | 5.60              | 1.69            | 3.67              |
| Sesame seeds                                              | 34.77                                         | 379.99            | 23.60           | 179.66            | 69.03           | 442.15            |
| Niger seeds                                               | 0.70                                          | 3.73              | 5.78            | 44.14             | 10.66           | 82.82             |
| Groundnut                                                 | 0.13                                          | 0.49              | 0.11            | 0.31              | 0.33            | 1.39              |
| Other oil seeds                                           | 51.56                                         | 163.29            | 62.51           | 218.62            | 116.64          | 392.36            |
| Vegetable oils                                            | 12731.60                                      | 64889.60          | 15643.74        | 68676.62          | 14007.39        | 73038.98          |
| Oil meals                                                 | 165.10                                        | 272.65            | 256.55          | 429.91            | 550.43          | 974.59            |
| Guargam meal                                              | 0.13                                          | 5.72              | 0.63            | 13.93             | 0.18            | 2.41              |
| Castor oil                                                | 0.05                                          | 1.81              | 0.03            | 1.10              | 0.11            | 1.50              |
| Shellac                                                   | 1.77                                          | 59.54             | 0.71            | 19.48             | 0.46            | 13.43             |
| Sugar                                                     | 1538.64                                       | 3668.21           | 1943.13         | 4037.86           | 2146.15         | 6868.61           |
| Mollases                                                  | 60.28                                         | 30.14             | 17.27           | 7.50              | 13.84           | 9.04              |
| Fruits / vegetable seeds                                  | 14.01                                         | 611.53            | 14.33           | 703.03            | 14.07           | 653.33            |
| Fresh fruits                                              | 900.98                                        | 9566.81           | 857.90          | 11071.57          | 1057.51         | 11290.62          |
| Fresh vegetables                                          | 8.24                                          | 11.14             | 140.73          | 394.45            | 8.55            | 11.12             |
| Processed vegetables                                      | 10.96                                         | 104.45            | 15.38           | 120.33            | 13.32           | 115.26            |
| Processed fruits and juices                               | 33.55                                         | 499.54            | 40.49           | 526.49            | 42.99           | 548.10            |
| Cereal preparations                                       | 72.72                                         | 583.93            | 61.70           | 575.42            | 66.46           | 579.03            |
| Cocoa products                                            | 65.39                                         | 1551.63           | 56.42           | 1398.91           | 63.61           | 1542.28           |
| Milled products                                           | 3.47                                          | 17.72             | 4.39            | 21.40             | 3.56            | 16.22             |
| Misc processed items                                      | -                                             | 1785.23           | -               | 1811.12           | 0.00            | 2115.82           |
| Animal casings                                            | 0.00                                          | 0.00              | 0.00            | 0.00              | 0.00            | 0.00              |
| Buffalo meat                                              | 0.00                                          | 0.00              | 0.00            | 0.00              | 0.00            | 0.00              |
| Sheep/goat meat                                           | 0.09                                          | 8.73              | 0.05            | 4.80              | 0.13            | 8.50              |
| Other meat                                                | 0.47                                          | 19.50             | 0.50            | 17.18             | 0.59            | 19.03             |
| Processed meat                                            | 0.17                                          | 5.17              | 0.07            | 2.75              | 0.13            | 4.47              |
| Dairy products                                            | 43.84                                         | 375.01            | 18.30           | 371.58            | 16.91           | 254.84            |
| Poultry products                                          | -                                             | 38.22             | -               | 26.42             | 0.00            | 29.46             |
| Floriculture products                                     | 4.82                                          | 113.37            | 4.77            | 114.40            | 5.57            | 133.81            |
| Alcoholic beverages                                       | -                                             | 2508.66           | -               | 2935.85           | 452.72          | 3590.33           |
| Marine products                                           | 27.72                                         | 453.90            | 50.35           | 639.77            | 52.02           | 633.39            |
| Ayush and herbal products                                 | 23.48                                         | 352.58            | 11.67           | 354.35            | 11.36           | 358.87            |
| Jute, raw                                                 | 44.00                                         | 139.58            | 88.37           | 363.44            | 138.84          | 704.13            |
| Jute hessian                                              | -                                             | 177.79            | -               | 181.41            | 0.00            | 57.45             |
| Cotton raw incld. Waste                                   | 289.39                                        | 3101.92           | 233.14          | 2566.21           | 499.62          | 6338.92           |
| <b>Total Agricultural Imports</b>                         | -                                             | <b>121319.02</b>  | -               | <b>140289.22</b>  | -               | <b>164726.83</b>  |
| <b>Total National Imports</b>                             | -                                             | <b>2737086.58</b> | -               | <b>2490298.08</b> | -               | <b>2577665.59</b> |
| <b>% Share of Agricultural Import in National Imports</b> | -                                             | <b>4.43</b>       | -               | <b>5.63</b>       | -               | <b>6.39</b>       |

(P) - Provisional

Note: Commodities covered under agriculture sector have been revised after inter-Departmental consultation.

Source: Directorate General of Commercial Intelligence &amp; Statistics, D/o Commerce, Kolkata.



**Table 13.3: India's Exports of Agricultural Commodities**

(Quantity: '000 tonnes)  
(Value in ₹ Crore)

| Commodity                                                  | 2014-15         |                   | 2015-16         |                   | 2016-17 (P)     |                   |
|------------------------------------------------------------|-----------------|-------------------|-----------------|-------------------|-----------------|-------------------|
|                                                            | Quantity<br>(1) | Value<br>(2)      | Quantity<br>(4) | Value<br>(5)      | Quantity<br>(6) | Value<br>(7)      |
| Tea                                                        | 234.39          | 4171.25           | 245.70          | 4719.00           | 243.43          | 4905.64           |
| Coffee                                                     | 463.55          | 4973.25           | 255.74          | 5125.45           | 288.61          | 5646.43           |
| Rice -Basmati                                              | 3698.93         | 27586.71          | 4045.83         | 22718.60          | 3985.21         | 21512.91          |
| Rice(other than Basmati)                                   | 8302.21         | 20441.55          | 6464.59         | 15483.39          | 6770.83         | 16929.88          |
| Wheat                                                      | 2924.05         | 4991.81           | 666.68          | 1061.77           | 265.61          | 447.85            |
| Other cereals                                              | 3515.35         | 5262.16           | 967.93          | 1702.50           | 734.77          | 1425.77           |
| Pulses                                                     | 222.14          | 1218.31           | 255.72          | 1655.90           | 136.72          | 1277.73           |
| Tobacco unmanufactured                                     | 219.57          | 4162.71           | 215.32          | 4373.45           | 204.45          | 4249.85           |
| Tobacco manufactured                                       | -               | 1705.88           | -               | 2078.91           | -               | 2174.12           |
| Spices                                                     | 939.01          | 14847.74          | 831.68          | 16630.37          | 1014.45         | 19111.25          |
| Cashew                                                     | 134.57          | 5565.85           | 103.13          | 5027.99           | 91.79           | 5278.61           |
| Cashew nut shell liquid                                    | 10.94           | 55.81             | 11.68           | 57.59             | 11.40           | 43.99             |
| Sesame seeds                                               | 375.66          | 4717.77           | 328.46          | 3012.31           | 307.33          | 2695.84           |
| Niger seeds                                                | 18.16           | 108.96            | 14.12           | 123.27            | 14.07           | 117.22            |
| Groundnut                                                  | 788.31          | 4675.37           | 542.73          | 4075.63           | 725.71          | 5444.33           |
| Other oil seeds                                            | 247.54          | 1135.36           | 204.62          | 964.47            | 193.27          | 846.58            |
| Vegetable oils                                             | 423.72          | 580.13            | 30.60           | 522.94            | 60.47           | 779.97            |
| Oil meals                                                  | 3904.59         | 8129.18           | 2056.36         | 3599.56           | 2632.26         | 5410.10           |
| Guargam meal                                               | 665.11          | 9478.26           | 325.25          | 3233.87           | 419.95          | 3106.62           |
| Castor oil                                                 | 566.46          | 4710.42           | 586.78          | 4616.10           | 599.20          | 4521.51           |
| Shellac                                                    | 5.24            | 267.47            | 6.39            | 203.31            | 6.06            | 225.53            |
| Sugar                                                      | 1955.19         | 5328.83           | 3844.45         | 9824.52           | 2544.01         | 8659.54           |
| Mollases                                                   | 247.61          | 193.01            | 818.57          | 656.84            | 390.67          | 314.94            |
| Fruits / vegetable seeds                                   | 12.50           | 427.04            | 13.10           | 529.19            | 11.29           | 522.75            |
| Fresh fruits                                               | 539.23          | 3160.08           | 654.66          | 4191.24           | 817.06          | 4974.21           |
| Fresh vegetables                                           | 2081.80         | 4666.45           | 2104.36         | 5237.10           | 3404.07         | 5790.71           |
| Processed vegetables                                       | 186.04          | 1721.89           | 174.43          | 1697.22           | 192.86          | 1765.75           |
| Processed fruits and juices                                | 588.38          | 3626.86           | 532.29          | 3767.08           | 533.15          | 3921.08           |
| Cereal preparations                                        | 313.67          | 3036.64           | 316.54          | 3358.12           | 339.95          | 3565.55           |
| Cocoa products                                             | 33.37           | 848.66            | 32.65           | 1267.61           | 25.65           | 1086.77           |
| Milled products                                            | 420.85          | 1030.61           | 431.46          | 1102.73           | 255.80          | 813.54            |
| Misc processed items                                       | -               | 2772.44           | -               | 2907.85           | -               | 3053.79           |
| Animal casings                                             | 0.26            | 19.33             | 0.21            | 17.02             | 0.17            | 13.84             |
| Buffalo meat                                               | 1503.51         | 29282.58          | 1314.22         | 26684.22          | 1323.58         | 26161.38          |
| Sheep/goat meat                                            | 23.61           | 828.11            | 21.95           | 837.76            | 22.01           | 869.84            |
| Other meat                                                 | -               | 2.67              | -               | 0.00              | -               | 0.21              |
| Processed meat                                             | 0.41            | 14.20             | 0.28            | 6.16              | -               | 4.58              |
| Dairy products                                             | 104.17          | 2169.03           | 77.53           | 1677.46           | 90.35           | 1701.18           |
| Poultry products                                           | -               | 651.19            | -               | 769.14            | -               | 530.44            |
| Floriculture products                                      | 22.95           | 460.80            | 22.69           | 483.41            | 22.02           | 546.71            |
| Alcoholic beverages                                        | -               | 2264.89           | -               | 2030.92           | 232.18          | 2004.79           |
| Marine products                                            | 1231.81         | 33688.38          | 978.04          | 31219.48          | 1185.27         | 39593.78          |
| Ayush and herbal products                                  | 92.06           | 2169.49           | 95.88           | 2385.49           | 83.36           | 2693.57           |
| Jute, raw                                                  | 37.39           | 119.20            | 25.11           | 113.58            | 18.18           | 76.63             |
| Jute hessian                                               | -               | 770.08            | -               | 824.89            | -               | 927.32            |
| Cotton raw incld. Waste                                    | 1142.53         | 11642.64          | 1347.07         | 12821.13          | 996.09          | 10907.32          |
| <b>Total Agricultural Exports</b>                          | -               | <b>239681.04</b>  | -               | <b>215396.55</b>  | -               | <b>226651.94</b>  |
| <b>Total National Exports</b>                              | -               | <b>1896445.47</b> | -               | <b>1716378.05</b> | -               | <b>1849428.76</b> |
| <b>% Share of Agricultural Exports in National Exports</b> | -               | <b>12.64</b>      | -               | <b>12.55</b>      | -               | <b>12.26</b>      |

(P) - Provisional

Note: Commodities covered under agriculture sector have been revised after inter-Departmental consultation.

Source: Directorate General of Commercial Intelligence & Statistics, D/o Commerce, Kolkata.

**Table 13.4: Leading Exporters and Importers of Agricultural Products in 2016**

(Billion dollars and Percentage)

| Country/Group                   | Value       | Share in world exports/imports |             |             |             | Annual percentage change |           |            |           |
|---------------------------------|-------------|--------------------------------|-------------|-------------|-------------|--------------------------|-----------|------------|-----------|
|                                 | 2016        | 2000                           | 2005        | 2010        | 2016        | 2010-16                  | 2014      | 2015       | 2016      |
| (1)                             | (2)         | (3)                            | (4)         | (5)         | (6)         | (7)                      | (8)       | (9)        | (10)      |
| <b>Exporters</b>                |             |                                |             |             |             |                          |           |            |           |
| European Union (28)             | 598         | 41.9                           | 44.2        | 39.3        | 37.7        | 2                        | 1         | -13        | 3         |
| extra-EU (28) exports           | 160         | 10.0                           | 9.7         | 9.4         | 10.1        | 4                        | 1         | -12        | 2         |
| United States of America        | 165         | 13.0                           | 9.7         | 10.5        | 10.4        | 2                        | 4         | -12        | 3         |
| Brazil                          | 77          | 2.8                            | 4.1         | 5.0         | 4.9         | 2                        | -3        | -9         | -4        |
| China                           | 76          | 3.0                            | 3.4         | 3.8         | 4.8         | 7                        | 6         | -3         | 5         |
| Canada                          | 63          | 6.3                            | 4.8         | 3.8         | 4.0         | 3                        | 4         | -7         | -1        |
| Indonesia <sup>a</sup>          | 38          | 1.4                            | 1.6         | 2.6         | 2.4         | 1                        | 3         | -10        | -4        |
| Argentina                       | 37          | 2.2                            | 2.2         | 2.5         | 2.3         | 1                        | -10       | -9         | 7         |
| Thailand                        | 37          | 2.2                            | 2.1         | 2.6         | 2.3         | 1                        | -2        | -8         | 1         |
| Australia                       | 34          | 3.0                            | 2.5         | 2.0         | 2.1         | 4                        | 3         | -7         | -6        |
| <b>India</b>                    | <b>34</b>   | <b>1.1</b>                     | <b>1.2</b>  | <b>1.7</b>  | <b>2.1</b>  | <b>6</b>                 | <b>-3</b> | <b>-19</b> | <b>-5</b> |
| <b>Above 10</b>                 | <b>1159</b> | <b>76.9</b>                    | <b>75.9</b> | <b>73.9</b> | <b>73.0</b> | -                        | -         | -          | -         |
| <b>Importers</b>                |             |                                |             |             |             |                          |           |            |           |
| European Union (28)             | 602         | 42.7                           | 45.3        | 40.0        | 36.8        | 1                        | 1         | -12        | 2         |
| extra-EU (28) imports           | 166         | 13.2                           | 12.6        | 11.1        | 10.2        | 1                        | 3         | -10        | 0         |
| United States of America        | 160         | 11.6                           | 10.6        | 8.4         | 9.8         | 5                        | 7         | 0          | 2         |
| China                           | 155         | 3.3                            | 5.0         | 7.8         | 9.5         | 6                        | 3         | -6         | -3        |
| Japan                           | 75          | 10.4                           | 7.3         | 5.6         | 4.6         | -1                       | -5        | -10        | 2         |
| Canada <sup>b</sup>             | 38          | 2.6                            | 2.4         | 2.3         | 2.3         | 3                        | 4         | -5         | -1        |
| Korea, Republic of              | 32          | 2.2                            | 1.9         | 1.9         | 2.0         | 3                        | 5         | -6         | -3        |
| <b>India</b>                    | <b>29</b>   | <b>0.7</b>                     | <b>0.8</b>  | <b>1.3</b>  | <b>1.8</b>  | <b>8</b>                 | <b>12</b> | <b>1</b>   | <b>5</b>  |
| Hong Kong, China                | 28          | -                              | -           | -           | -           | 5                        | 5         | -6         | 3         |
| retained imports <sup>a</sup>   | 18          | 1.1                            | 0.8         | 1.0         | 1.1         | 5                        | 6         | -9         | 1         |
| Mexico <sup>b</sup>             | 28          | 1.8                            | 1.8         | 1.7         | 1.7         | 3                        | 3         | -8         | 1         |
| Russian Federation <sup>b</sup> | 26          | 1.3                            | 1.9         | 2.6         | 1.6         | -5                       | -8        | -33        | -6        |
| <b>Above 10</b>                 | <b>1162</b> | <b>77.5</b>                    | <b>77.9</b> | <b>72.8</b> | <b>71.1</b> | -                        | -         | -          | -         |

Note: 'a' Includes WTO Secretariat's estimates and 'b' Imports are valued f.o.b.

Source: World Trade Statistical Review 2017, World Trade Organisation

# INTERNATIONAL COMPARISONS

**Table 14.1: India's Position in World Agriculture in 2015**

| Item                                                          | India | World | % Share | India's Rank | Next to                                                                                |
|---------------------------------------------------------------|-------|-------|---------|--------------|----------------------------------------------------------------------------------------|
| (1)                                                           | (2)   | (3)   | (4)     | (5)          | (6)                                                                                    |
| <b>1. Total Area (Million Hectares)</b>                       | 329   | 13467 | 2.4     | Seventh      | Russian Federation, Canada, U.S.A., China, Brazil, Australia                           |
| Land Area                                                     | 297   | 13009 | 2.3     | Seventh      | Russian Federation, China, U.S.A., Canada, Brazil, Australia                           |
| Arable Land                                                   | 156   | 1426  | 11.0    | Second       | U.S.A.                                                                                 |
| <b>2. Population (Million)</b>                                |       |       |         |              |                                                                                        |
| Total                                                         | 1309  | 7383  | 17.7    | Second       | China                                                                                  |
| Rural                                                         | 862   | 3368  | 25.6    | First        |                                                                                        |
| <b>3. Crop Production (Million Tonnes)</b>                    |       |       |         |              |                                                                                        |
| <b>(A) : Total Cereals</b>                                    | 284   | 2796  | 10.2    | Third        | China, U.S.A                                                                           |
| Wheat                                                         | 87    | 737   | 11.7    | Second       | China                                                                                  |
| Rice (Paddy)                                                  | 157   | 740   | 21.2    | Second       | China                                                                                  |
| <b>(B): Total Pulses</b>                                      | 17    | 78    | 22.5    | First        |                                                                                        |
| <b>(C) : Oilseeds</b>                                         |       |       |         |              |                                                                                        |
| Groundnut (in shell)                                          | 7     | 45    | 15.0    | Second       | China                                                                                  |
| Rapeseed                                                      | 6     | 71    | 8.8     | Third        | Canada, China                                                                          |
| <b>(D): Commercial Crops</b>                                  |       |       |         |              |                                                                                        |
| Sugarcane                                                     | 362   | 1887  | 19.2    | Second       | Brazil                                                                                 |
| Tea                                                           | 1.2   | 5.7   | 21.8    | Second       | China                                                                                  |
| Coffee (green)                                                | 0.3   | 8.9   | 3.7     | Seventh      | Brazil, Vietnam, Columbia, Indonesia, Ethiopia, Honduras                               |
| Jute & Jute like Fibres                                       | 1.9   | 3.5   | 54.0    | First        |                                                                                        |
| Cotton (lint)                                                 | 6.2   | 26.2  |         | Second       | China                                                                                  |
| Tobacco Unmanufactured                                        | 0.7   | 7.0   | 10.7    | Third        | China, Brazil                                                                          |
| <b>4. Fruits &amp; Vegetables Production (Million Tonnes)</b> |       |       |         |              |                                                                                        |
| (A) :Vegetables& Melons                                       | 119   | 1195  | 10.0    | Second       | China                                                                                  |
| (B) : Fruits excluding Melons                                 | 87    | 710   | 12.3    | Second       | China                                                                                  |
| (C) : Potatoes                                                | 48    | 377   | 12.7    | Second       | China                                                                                  |
| (D) : Onion (Dry)                                             | 19    | 91    | 20.8    | Second       | China                                                                                  |
| <b>5. Livestock (Million Heads)</b>                           |       |       |         |              |                                                                                        |
| (A) : Cattle                                                  | 185   | 1452  | 12.7    | Second       | Brazil                                                                                 |
| (B) : Buffaloes                                               | 111   | 196   | 56.4    | First        |                                                                                        |
| (C) : Camels                                                  | 0.4   | 28    | 1.3     | Twelfth      | Somalia, Sudan, Kenya, Niger, Mauritania, Chad, Ethiopia, Pakistan, Mali, Yemen, U.A.E |
| (D) : Sheep                                                   | 62    | 1160  | 5.4     | Third        | China, Australia                                                                       |
| (E) : Goats                                                   | 132   | 979   | 13.5    | Second       | China                                                                                  |
| (F) : Chicken                                                 | 740   | 22112 | 3.3     | Sixth        | China, U.S.A, Indonesia, Brazil, Iran                                                  |
| <b>6. Animal Products (Million Tonnes)</b>                    |       |       |         |              |                                                                                        |
| (A) : Milk Total                                              | 156   | 807   | 19.3    | First        |                                                                                        |
| (B) : Eggs (Primary) Total                                    | 4     | 78    | 5.5     | Third        | China, U.S.A                                                                           |
| (C) : Meat Total                                              | 7     | 324   | 2.2     | Sixth        | China, U.S.A, Brazil, Russian federation, Germany                                      |

Source: FAOSTAT (as on 11.01.2018)

**Table 14.2: Area, Production and Yield of Principal Crops in various Countries in 2015**

| Country                     | Area          | Production     | Area - "000" Hectares     |                     |
|-----------------------------|---------------|----------------|---------------------------|---------------------|
|                             |               |                | Production - "000" Tonnes | Yield - Kg./Hectare |
| (1)                         | (2)           | (3)            | (4)                       | (5)                 |
| <b>1. Paddy</b>             |               |                |                           |                     |
| <b>World</b>                | <b>160762</b> | <b>740085</b>  | <b>4604</b>               | <b>100.00</b>       |
| China                       | 30216         | 208230         | 6891                      | 28.14               |
| India                       | 43390         | 156540         | 3608                      | 21.15               |
| Indonesia                   | 14117         | 75398          | 5341                      | 10.19               |
| Bangladesh                  | 11372         | 51278          | 4509                      | 6.93                |
| Viet Nam                    | 7831          | 45105          | 5760                      | 6.09                |
| Thailand                    | 9718          | 27702          | 2851                      | 3.74                |
| Myanmar                     | 6769          | 26210          | 3872                      | 3.54                |
| Philippines                 | 4656          | 18150          | 3898                      | 2.45                |
| Brazil                      | 2138          | 12301          | 5753                      | 1.66                |
| Japan                       | 1506          | 9986           | 6631                      | 1.35                |
| <b>2. Wheat</b>             |               |                |                           |                     |
| <b>World</b>                | <b>222157</b> | <b>736985</b>  | <b>3317</b>               | <b>100.00</b>       |
| China                       | 24141         | 130185         | 5393                      | 17.66               |
| India                       | 31470         | 86530          | 2750                      | 11.74               |
| USA                         | 19058         | 55840          | 2930                      | 7.58                |
| France                      | 5480          | 42750          | 7801                      | 5.80                |
| Canada                      | 9577          | 27594          | 2881                      | 3.74                |
| Germany                     | 3283          | 26550          | 8088                      | 3.60                |
| Ukraine                     | 6840          | 26532          | 3879                      | 3.60                |
| Pakistan                    | 9204          | 25086          | 2726                      | 3.40                |
| Oceania                     | 12431         | 24156          | 1943                      | 3.28                |
| Australia                   | 12384         | 23743          | 1917                      | 3.22                |
| <b>3. Maize</b>             |               |                |                           |                     |
| <b>World</b>                | <b>182490</b> | <b>1010609</b> | <b>5538</b>               | <b>100.00</b>       |
| USA                         | 32678         | 345486         | 10572                     | 34.19               |
| China                       | 38119         | 224630         | 5893                      | 22.23               |
| Brazil                      | 15406         | 85285          | 5536                      | 8.44                |
| Argentina                   | 4627          | 33818          | 7309                      | 3.35                |
| Mexico                      | 7100          | 24694          | 3478                      | 2.44                |
| Ukraine                     | 4084          | 23328          | 5713                      | 2.31                |
| India                       | 8690          | 22570          | 2597                      | 2.23                |
| Indonesia                   | 3787          | 19612          | 5178                      | 1.94                |
| France                      | 1637          | 13716          | 8378                      | 1.36                |
| Canada                      | 1312          | 13559          | 10337                     | 1.34                |
| <b>4. Pulses</b>            |               |                |                           |                     |
| <b>World</b>                | <b>81616</b>  | <b>77573</b>   | <b>950</b>                | <b>100.00</b>       |
| India                       | 27040         | 17482          | 647                       | 22.54               |
| Myanmar                     | 4250          | 6289           | 1480                      | 8.11                |
| Canada                      | 3251          | 6068           | 1867                      | 7.82                |
| China, mainland             | 2392          | 4164           | 1741                      | 5.37                |
| Brazil                      | 2885          | 3097           | 1074                      | 3.99                |
| Ethiopia                    | 1615          | 2955           | 1830                      | 3.81                |
| United States of America    | 1420          | 2575           | 1813                      | 3.32                |
| Russian Federation          | 1582          | 2467           | 1560                      | 3.18                |
| Nigeria                     | 3776          | 2371           | 628                       | 3.06                |
| United Republic of Tanzania | 2084          | 2016           | 968                       | 2.60                |

(Contd..)

| Country                          | Area         | Production     | Yield        | Production (%) |
|----------------------------------|--------------|----------------|--------------|----------------|
| (1)                              | (2)          | (3)            | (4)          | (5)            |
| <b>5. Sugarcane</b>              |              |                |              |                |
| <b>World</b>                     | <b>26664</b> | <b>1886875</b> | <b>70764</b> | <b>100.00</b>  |
| Brazil                           | 10111        | 750290         | 74203        | 39.76          |
| India                            | 5070         | 362333         | 71466        | 19.20          |
| China                            | 1600         | 116968         | 73121        | 6.20           |
| Thailand                         | 1401         | 94138          | 67206        | 4.99           |
| Pakistan                         | 1131         | 65482          | 57873        | 3.47           |
| Mexico                           | 759          | 55396          | 73023        | 2.94           |
| Colombia                         | 409          | 36710          | 89654        | 1.95           |
| Oceania                          | 421          | 34276          | 81373        | 1.82           |
| Indonesia                        | 456          | 25349          | 55611        | 1.34           |
| Philippines                      | 421          | 22926          | 54417        | 1.22           |
| <b>6. Groundnut (in shell)</b>   |              |                |              |                |
| <b>World</b>                     | <b>26800</b> | <b>45077</b>   | <b>1682</b>  | <b>100.00</b>  |
| China                            | 4616         | 16440          | 3562         | 36.47          |
| India                            | 4560         | 6771           | 1485         | 15.02          |
| Nigeria                          | 2802         | 3467           | 1238         | 7.69           |
| USA                              | 634          | 2817           | 4442         | 6.25           |
| United Republic of Tanzania      | 1625         | 1836           | 1130         | 4.07           |
| Myanmar                          | 950          | 1518           | 1598         | 3.37           |
| Senegal                          | 1135         | 1050           | 925          | 2.33           |
| Sudan                            | 1465         | 1042           | 711          | 2.31           |
| Argentina                        | 425          | 1011           | 2380         | 2.24           |
| Indonesia                        | 454          | 605            | 1333         | 1.34           |
| <b>7. Tobacco Unmanufactured</b> |              |                |              |                |
| <b>World</b>                     | <b>3889</b>  | <b>6985</b>    | <b>1796</b>  | <b>100.00</b>  |
| China                            | 1314         | 2832           | 2156         | 40.55          |
| Brazil                           | 406          | 867            | 2137         | 12.42          |
| India                            | 444          | 747            | 1683         | 10.69          |
| USA                              | 133          | 326            | 2453         | 4.67           |
| Indonesia                        | 209          | 194            | 927          | 2.77           |
| Zimbabwe                         | 132          | 171            | 1295         | 2.45           |
| Malawi                           | 142          | 120            | 851          | 1.72           |
| Pakistan                         | 54           | 120            | 2231         | 1.72           |
| Argentina                        | 55           | 109            | 1977         | 1.56           |
| Turkey                           | 106          | 75             | 708          | 1.07           |

Source: FAOSTAT (as on 26.12.2017).

**Table 14.3: Major Macro-Economic Indicators of India, G-20 and the World in 2016**

| Country           | Area (Sq. Km.)<br>2010 | Population<br>(Million) | GDP Billion<br>(US\$) | Domestic Product<br>Per Capita Income<br>(US\$) | Purchasing Power<br>in Billion US \$ |
|-------------------|------------------------|-------------------------|-----------------------|-------------------------------------------------|--------------------------------------|
| (1)               | (2)                    | (3)                     | (4)                   | (5)                                             | (6)                                  |
| Argentina         | 2766890                | 43                      | 579                   | 13,428                                          | 964                                  |
| Australia         | 7686850                | 24                      | 1241                  | 51,642                                          | 1,137                                |
| Brazil            | 8511965                | 204                     | 1800                  | 8,802                                           | 3,208                                |
| Canada            | 9976140                | 36                      | 1573                  | 43,935                                          | 1,628                                |
| China             | 9596960                | 1375                    | 11385                 | 8,280                                           | 19,510                               |
| France            | 547030                 | 64                      | 2423                  | 37,728                                          | 2,647                                |
| Germany           | 357021                 | 82                      | 3371                  | 41,267                                          | 3,842                                |
| <b>India</b>      | <b>3287590</b>         | <b>1293</b>             | <b>2182</b>           | <b>1,688</b>                                    | <b>8,027</b>                         |
| Indonesia         | 1919440                | 255                     | 873                   | 3,416                                           | 2,839                                |
| Italy             | 301230                 | 61                      | 1819                  | 29,847                                          | 2,174                                |
| Japan             | 377835                 | 127                     | 4116                  | 32,481                                          | 4,842                                |
| Mexico            | 1972550                | 121                     | 1161                  | 9,592                                           | 2,220                                |
| Russia            | 17075200               | 146                     | 1236                  | 8,447                                           | 3,474                                |
| Saudi Arabia      | 1960582                | 31                      | 632                   | 20,139                                          | 1,681                                |
| South Africa      | 1219912                | 55                      | 317                   | 5,784                                           | 724                                  |
| Republic of Korea | 98480                  | 51                      | 1393                  | 27,513                                          | 1,849                                |
| Turkey            | 780580                 | 78                      | 722                   | 9,290                                           | 1,576                                |
| United Kingdom    | 244820                 | 65                      | 2865                  | 44,118                                          | 2,660                                |
| USA               | 9629091                | 321                     | 17968                 | 55,904                                          | 17,968                               |
| European Union    | 4324782                | 514                     | 16266                 | 37,802                                          | 19,176                               |
| <b>World</b>      | <b>510072000</b>       | <b>7256</b>             | <b>73507</b>          | <b>10,699</b>                                   | <b>113,162</b>                       |

Source: Statistical Year Book India- 2016, Ministry of Statistics & Programme Implementation

**Table 14.4: Major Macro Economic, Land-Use and Social Indicators of BRICS Economies in 2015**

| Indicators<br>(1)                                                | Brazil<br>(2) | Russia<br>(3) | China<br>(4) | India<br>(5) | South Africa<br>(6) |
|------------------------------------------------------------------|---------------|---------------|--------------|--------------|---------------------|
| <b>Macro-Economic Indicators</b>                                 |               |               |              |              |                     |
| Total Population (Million)                                       | 205.96        | 144.10        | 1371.22      | 1309.05      | 55.01               |
| Urban Population (% of Total)                                    | 85.69         | 74.00         | 55.61        | 32.75        | 64.80               |
| Share in World Exports (%)                                       | 1.20          | 2.10          | 13.80        | 1.60         | 0.50                |
| GDP in PPP (US \$ Billion) - *current international \$           | 3222.82       | 3470.24       | 19852.73     | 8036.54      | 729.29              |
| GDP (US \$ Billion)                                              | 1803.65       | 1365.86       | 11064.67     | 2089.87      | 317.61              |
| Per Capita GDP (US \$)                                           | 8757.21       | 9329.30       | 8069.21      | 1596.47      | 5773.48             |
| <b>Land Use Indicators</b>                                       |               |               |              |              |                     |
| Land Area (Million ha)                                           | 835.81        | 1637.69       | 938.82       | 297.32       | 121.31              |
| Arable Land Area (Million Ha)                                    | 80.02         | 123.12        | 119.00       | 156.46       | 12.50               |
| Irrigated Land (Million Ha)                                      | 5.40          | 4.30          | 71.74        | 70.40        | 1.67                |
| Irrigated Land (% of arable land)                                | 6.75          | 3.49          | 60.29        | 45.00        | 13.36               |
| Area Harvested for Cereals (Million Ha)                          | 21.20         | 42.84         | 95.92        | 99.53        | 3.37                |
| Production of Cereals (Million Tonnes)                           | 106.03        | 102.45        | 573.80       | 284.33       | 11.93               |
| <b>Major Health Indicators*</b>                                  |               |               |              |              |                     |
| Health expenditure per capita (current US\$)                     | 947.43        | 892.85        | 419.73       | 74.99        | 570.21              |
| Health expenditure, public (% of GDP)                            | 3.83          | 3.69          | 3.10         | 1.41         | 4.24                |
| Health expenditure, total (% of GDP)                             | 8.32          | 7.07          | 5.55         | 4.69         | 8.80                |
| Life expectancy at birth, total (years)                          | 74.96         | 70.74         | 75.96        | 68.05        | 60.95               |
| Mortality rate, infant (per 1,000 live births)                   | 14.70         | 7.10          | 9.90         | 37.90        | 35.60               |
| <b>Labor and Social Protection Indicators</b>                    |               |               |              |              |                     |
| Age dependency ratio, young (% of working-age population)        | 32.38         | 24.16         | 24.35        | 43.62        | 44.75               |
| Birth rate, crude (per 1,000 people)                             | 14.41         | 13.30         | 12.10        | 19.27        | 21.30               |
| Population growth (annual %)                                     | 0.85          | 0.19          | 0.51         | 1.17         | 1.58                |
| Labor participation rate, total (% of total population ages 15+) | 64.10         | 63.66         | 69.74        | 53.95        | 54.65               |
| Unemployment, total (% of total labor force)                     | 8.50          | 5.59          | 4.50         | 3.50         | 25.20               |

\* Figure relates to 2014

Source:

1. World Development Indicators, World Bank
2. World Trade Statistical Review 2016, WTO
3. FAO Statistics



**Table 14.5: Major Economic and Land-Use Indicators : India and China**

| Indicator Name                                                                               | China        |        |        | India     |        |        |        |
|----------------------------------------------------------------------------------------------|--------------|--------|--------|-----------|--------|--------|--------|
|                                                                                              | 2014         | 2015   | 2016   | 2014      | 2015   | 2016   |        |
| (1)                                                                                          | (2)          | (3)    | (4)    | (5)       | (6)    | (7)    |        |
| GDP growth (annual %)                                                                        | 7.30         | 6.90   | 6.69   | 7.51      | 8.01   | 7.11   |        |
| Population growth (annual %)                                                                 | 0.51         | 0.51   | 0.54   | 1.19      | 1.17   | 1.15   |        |
| Arable land (% of land area)                                                                 | 11.25        | 12.67  |        | 52.62     | 52.62  |        |        |
| Agricultural area ('000 Hectare)                                                             | 515358       | 528635 |        | 179721    | 179721 |        |        |
| Agricultural area (% of land area)                                                           | 54.81        | 56.22  |        | 60.45     | 60.45  |        |        |
| Total area equipped for irrigation (% of total agricultural area)                            | 13.66        | 13.57  |        | 39.17     | 39.17  |        |        |
| Agriculture, value added (% of GDP)                                                          | 9.06         | 8.83   | 8.56   | 18.02     | 17.46  | 17.35  |        |
| Methane emissions from agriculture (CO2 equivalent in gigagrams)                             | 349729.11    |        |        | 406866.33 |        |        |        |
| Fertilizer consumption (kilograms per hectare of arable land and land under permanent crops) | 565.25       |        |        | 165.12    |        |        |        |
| Inflation, consumer prices (annual %)                                                        | 1.99         | 1.44   | 2.01   | 6.65      | 4.91   | 4.94   |        |
| <b>Land-Use Indicators (2016)</b>                                                            |              |        |        |           |        |        |        |
| <b>Area Harvested (Million Hectares)</b>                                                     | Wheat        | 24.07  | 24.14  | 24.35     | 30.47  | 31.47  | 30.23  |
|                                                                                              | Rice (Paddy) | 30.58  | 30.47  | 30.45     | 44.11  | 43.39  | 42.96  |
|                                                                                              | Maize        | 37.15  | 38.15  | 38.98     | 9.26   | 8.69   | 10.20  |
|                                                                                              | Soy Bean     | 6.80   | 6.51   | 6.64      | 11.09  | 11.67  | 11.50  |
| <b>Production (Million Tonnes)</b>                                                           | Wheat        | 126.22 | 130.19 | 131.70    | 95.85  | 86.53  | 93.50  |
|                                                                                              | Rice (Paddy) | 208.24 | 209.81 | 211.09    | 157.20 | 156.54 | 158.76 |
|                                                                                              | Maize        | 215.81 | 224.80 | 231.84    | 24.17  | 22.57  | 26.26  |
|                                                                                              | Soy Bean     | 12.16  | 11.79  | 11.97     | 10.37  | 8.57   | 14.01  |

Source: FAO Statistics and World Development Indicators, World Bank

Note: Figures for China pertains to China Mainland only

**Table 14.6: Inflation (Consumer Prices) in Major Economies (Annual %)**

| Country              | 2011 | 2012 | 2013 | 2014 | 2015 | 2016 |
|----------------------|------|------|------|------|------|------|
| (1)                  | (2)  | (3)  | (4)  | (5)  | (6)  | (7)  |
| Australia            | 3.3  | 1.8  | 2.4  | 2.5  | 1.5  | 1.3  |
| Brazil               | 6.6  | 5.4  | 6.2  | 6.3  | 9.0  | 8.7  |
| Canada               | 2.9  | 1.5  | 0.9  | 1.9  | 1.1  | 1.4  |
| China                | 5.4  | 2.6  | 2.6  | 2.0  | 1.4  | 2.0  |
| Euro area            | 3.3  | 2.5  | 1.4  | 0.2  | 0.0  | 0.2  |
| Germany              | 2.1  | 2.0  | 1.5  | 0.9  | 0.2  | 0.5  |
| European Union       | 3.3  | 2.7  | 1.4  | 0.2  | -0.1 | 0.2  |
| Italy                | 2.7  | 3.0  | 1.2  | 0.2  | 0.0  | -0.1 |
| India                | 8.9  | 9.3  | 10.9 | 6.4  | 5.9  | 4.9  |
| Indonesia            | 5.4  | 4.3  | 6.4  | 6.4  | 6.4  | 3.5  |
| Hong Kong SAR, China | 5.3  | 4.1  | 4.4  | 4.4  | 3.0  | 2.4  |
| Japan                | -0.3 | 0.0  | 0.4  | 2.7  | 0.8  | -0.1 |
| Mexico               | 3.4  | 4.1  | 3.8  | 4.0  | 2.7  | 2.8  |
| OECD members         | 3.3  | 2.5  | 1.4  | 0.6  | 0.2  | 0.4  |
| Russian Federation   | 8.4  | 5.1  | 6.8  | 7.8  | 15.5 | 7.1  |
| Singapore            | 5.3  | 4.5  | 2.4  | 1.0  | -0.5 | -0.5 |
| South Asia           | 9.7  | 9.4  | 7.6  | 6.7  | 3.5  | 3.7  |
| South Africa         | 5.0  | 5.7  | 5.4  | 6.4  | 4.6  | 6.3  |
| Switzerland          | 0.2  | -0.7 | -0.2 | 0.0  | -1.1 | -0.4 |
| United Kingdom       | 4.5  | 2.8  | 2.6  | 1.5  | 0.1  | 0.6  |
| United States        | 3.2  | 2.1  | 1.5  | 1.6  | 0.1  | 1.3  |
| World                | 5.0  | 3.9  | 2.7  | 2.7  | 1.4  | 1.6  |

Source: World Bank

**Chart 14(a): Projected Wheat Production in China and India**

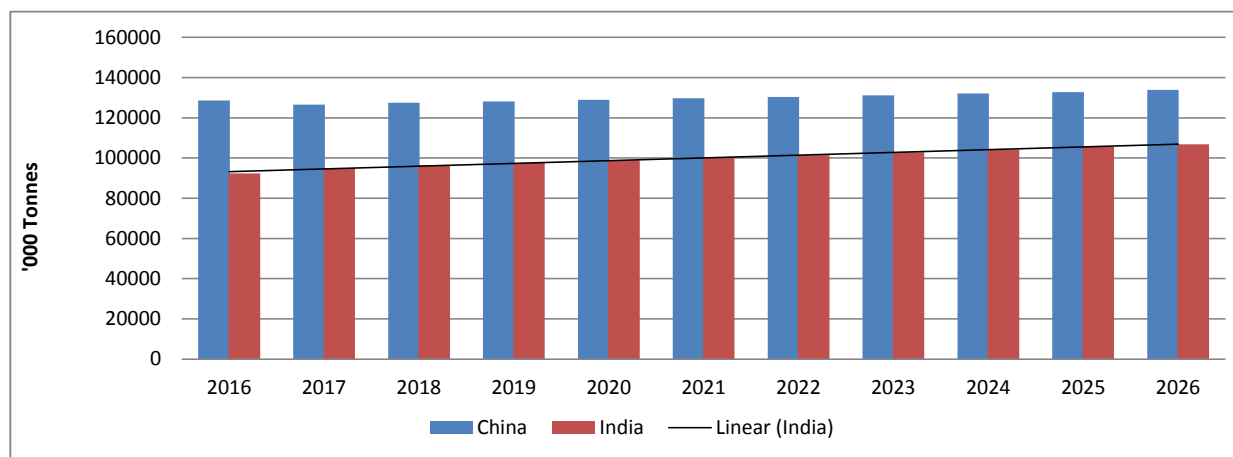

Source: OECD- FAO Agriculture Outlook 2017-26

**Chart 14 (b): Projected Nutri Grains Production in U.S, China and India**

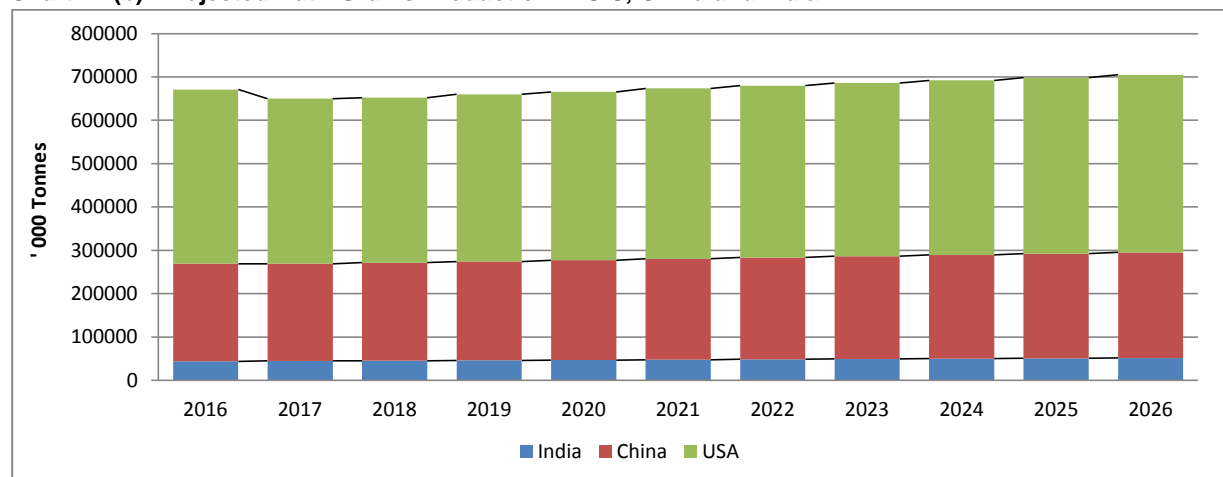

Source: OECD- FAO Agriculture Outlook 2017-26

**Chart 14 (c): Projected Oilseeds Production in China, India and Canada**

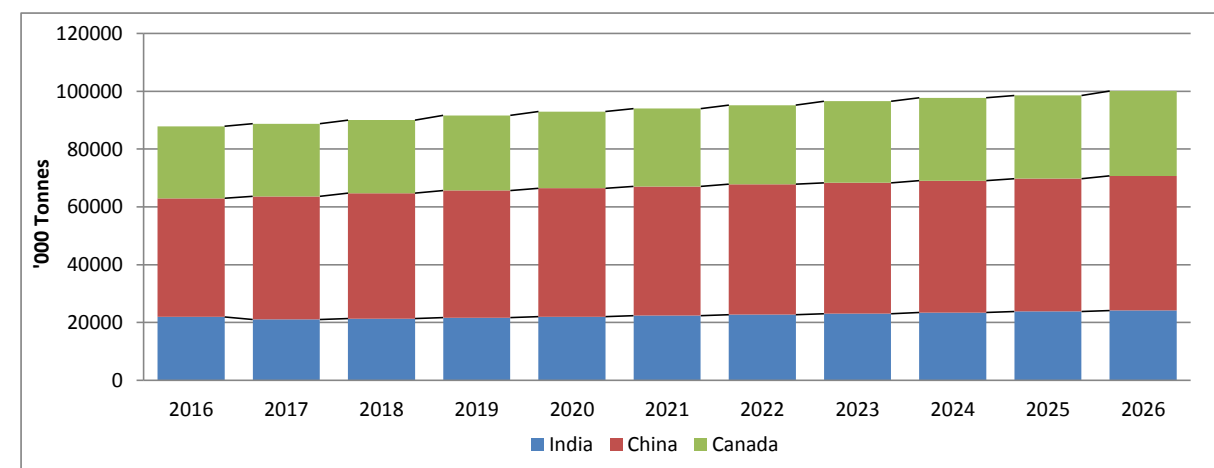

Note: Oilseeds include Soy Beans, sunflower and rapeseed/canola. Year beginning 1st August

Source: OECD- FAO Agriculture Outlook 2017-26

# GLOBAL AGRICULTURAL EMISSIONS

**Chart 15 (a): All GHG Emission from Agriculture sector by major Continents in 2015 (CO<sub>2</sub> equivalent)**

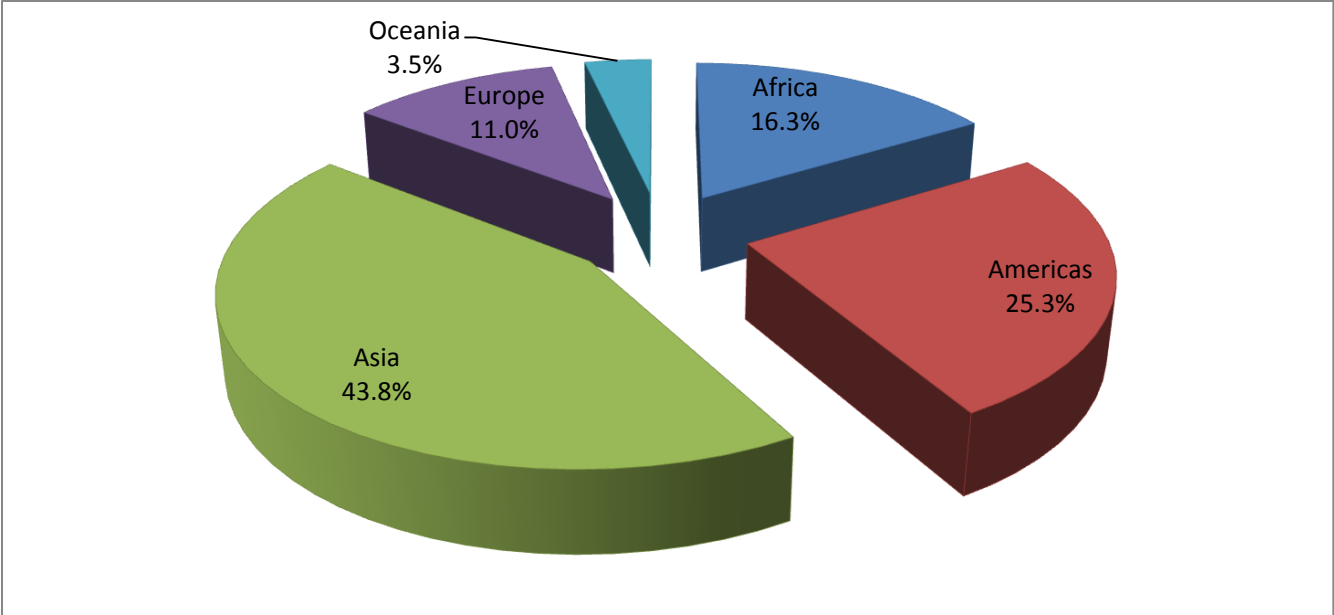

Source: FAOSTAT

**Chart 15 (b): Source-wise Total GHG Emissions from Agriculture Sector in 2015**

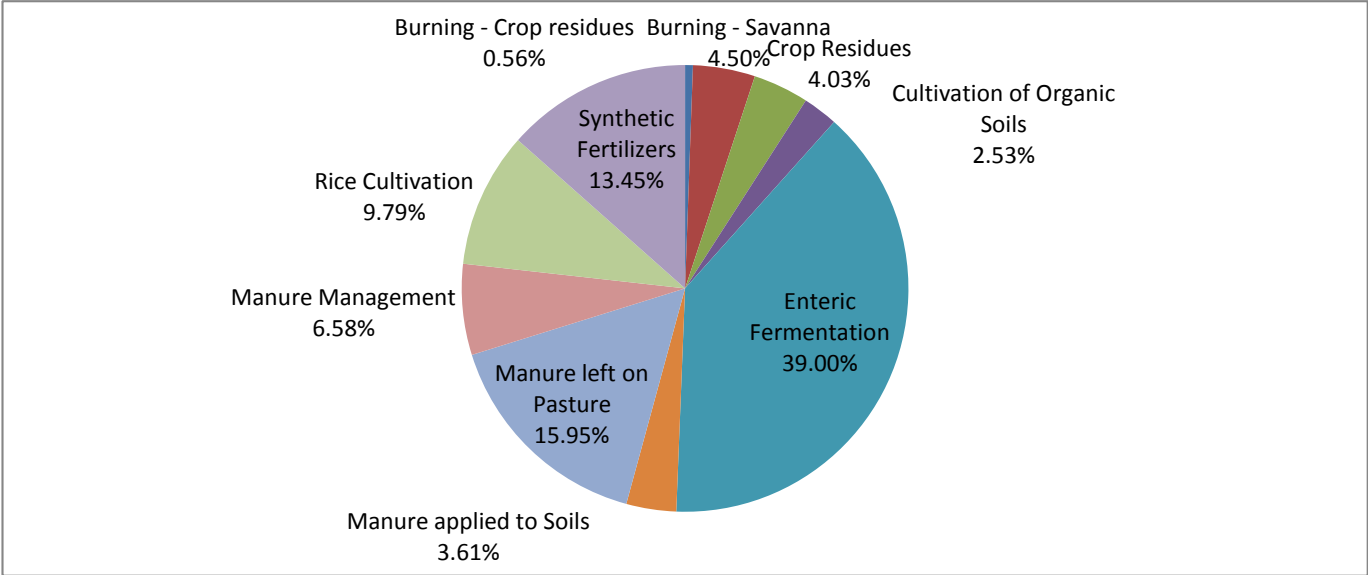

Source: FAOSTAT

# APPENDICES

## A.1: Explanatory Notes

### Advance Estimates

The estimates of area, production and yield rates for 2016-17 are “Advance Estimates” as on 16-08-2017 and are based on deliberations held in weekly inter-disciplinary meetings of Crop Weather Watch Group, availability of water in important reservoirs in the country, availability/supply of important inputs including credit to farmers community, feedback received from states etc. These estimates are “advance” in the sense that these have been prepared in advance of availability of results of CCE (Crop Cutting Experiments) and are subject to revision as more precise information flows from states to DES.

### Yield

Yield rate is defined as production per unit of area. However, yield rates of various crops given in this publication may not exactly tally with the ratio of production to the corresponding area because figures of area and production of various crops have been generally rounded off in ten thousands.

### Principal Crops

Principal Crops as referred to in this publication include only those crops which are covered for preparation of index numbers.

### Estimation Procedure for Non-Availability of Data for 2016-17

The index numbers of area, production and yield rate for 2015-16 (from where growth rates have been derived) are based on advance estimates of principal crops as on 16-08-2017. However, there are a number of ‘non-forecast’ crops such as plantation crops and spices for which no advance estimates for 2016-17 (or for that matter any year) are prepared. In such cases, the estimates of area and production for the previous years are repeated for the purpose of index numbers.

### Nine Oilseeds

Wherever “Nine oilseeds” is mentioned in this publication, it includes Castor seed, Groundnut, Linseed, Nigerseed, Safflower, Sesamum, Soyabean, Sunflower and Rapeseed & Mustard.

### Total Oilseeds

Total oilseeds include cottonseed and coconut besides nine oilseeds mentioned in the above paragraph.

### Net Availability of Foodgrains

The Net availability of foodgrains is defined as, where

$$\begin{aligned} \text{NAF} &= \text{GP} - \text{SFW} - e + i + s \\ \text{NAF} &= \text{Net availability of Foodgrains} \\ \text{GP} &= \text{Gross Production of Foodgrains} \\ \text{SFW} &= \text{Seed, feed and wastages of Foodgrains} \\ e &= \text{Exports of Foodgrains} \\ i &= \text{Imports of Foodgrains} \\ s &= \text{Change in Stocks of Foodgrains} \end{aligned}$$

To work out per capita net availability of foodgrains in terms of kg. per year, NAF is divided by the estimated population for a particular year. When this is further divided by the number of days in a year i.e. 365 days, it gives net availability of foodgrains per day.

## A.2 : Conversion Factors between Important Primary and Secondary Agricultural Commodities

| Commodity<br>(1)                 | Conversion Factor<br>(2)                  |
|----------------------------------|-------------------------------------------|
| <b>Rice</b> (Cleaned) Production | 2/3 of Paddy Production                   |
| <b>Cotton</b>                    |                                           |
| Cotton Lint Production           | 1/3 of Kapas Production                   |
| Cotton Seed Production           | 2/3 of Kapas Production                   |
|                                  | 2 Times of Cotton Lint Production         |
| <b>Jute</b>                      |                                           |
| 100 Yards of Hessian             | 54 lbs. of Raw Jute                       |
| 4148 Yards of Hessian            | 1 Ton of Raw Jute                         |
|                                  | 5.55 Bales of Raw Jute (of 180 Kgs. Each) |
| 1 Ton of Sacking                 | 1.11 Tons of Raw Jute                     |
|                                  | 6.17 Bales of Raw Jute (of 180 Kgs. Each) |
| 1 Ton of Hessian                 | 1.05 Tons of Raw Jute                     |
| Sacking etc.                     | 5.85 Bales of Raw Jute (of 180 Kgs. Each) |
| <b>Groundnut</b>                 |                                           |
| Kernel to Nuts in Shell          | 70 Percent                                |
| Oil to Nuts in Shell             | 28 Percent                                |
| Oil to Kernels Crushed           | 40 Percent                                |
| Cake to Kernels Crushed          | 60 Percent                                |
| <b>Sesamum</b>                   |                                           |
| Oil to Seeds Crushed             | 40 Percent                                |
| Cake to Seeds Crushed            | 60 Percent                                |
| <b>Rapseed and Mustard</b>       |                                           |
| Oil to Seeds Crushed             | 33 Percent                                |
| Cake to Seeds Crushed            | 67 Percent                                |
| <b>Linseed</b>                   |                                           |
| Oil to seeds Crushed             | 33 Percent                                |
| Cake to Seeds Crushed            | 67 Percent                                |
| <b>Castorseed</b>                |                                           |
| Oil to Seeds Crushed             | 37 Percent                                |
| Cake to Seeds Crushed            | 63 Percent                                |
| <b>Cotton Seed</b>               |                                           |
| Oil to Seeds Crushed             | 14 to 18 Percent                          |
| Cake to Seeds Crushed            | 82 to 86 Percent                          |
| <b>Coconut</b>                   |                                           |
| Copra to Nuts                    | One Ton of Copra = 6773 Nuts              |
| Oil to Copra Crushed             | 62 Percent                                |
| Cake to Copra Crushed            | 38 Percent                                |
| <b>Nigerseed</b>                 |                                           |
| Oil to Seeds Crushed             | 28 Percent                                |
| Cake to Seeds Crushed            | 72 Percent                                |

(Contd.)



| Commodity<br>(1)                                                        | Conversion Factor<br>(2)       |
|-------------------------------------------------------------------------|--------------------------------|
| <b>Kardi Seed</b>                                                       |                                |
| Oil to Seeds Crushed                                                    | 40 Percent                     |
| Cake to Seeds Crushed                                                   | 60 Percent                     |
| <b>Mahua Seed</b>                                                       |                                |
| Oil to Seeds Crushed                                                    | 36 Percent                     |
| Cake to Seeds Crushed                                                   | 64 Percent                     |
| <b>Neem Seed</b>                                                        |                                |
| Oil to Kernels Crushed                                                  | 45 to 50 Percent               |
| Cake to Kernels Crushed                                                 | 50 to 55 Percent               |
| <b>Soyabean Seed</b>                                                    |                                |
| Oil to Soyabean Seed Crushed                                            | 18 Percent                     |
| Meal to Soyabean Seed Crushed                                           | 73 Percent                     |
| Hull from Soyabean Seed Crushed                                         | 8 Percent                      |
| Wastage from Soyabean Seed Crushed                                      | 1 Percent                      |
| <b>Sugar</b>                                                            |                                |
| Gur from Cane Crushed                                                   | 11.20 Percent to 11.50 Percent |
| Crystal Sugar from Gur Refined (Gur Refineries)                         | 62.5 Percent                   |
| Crystal Sugar from Cane Crushed (Cane Factories)                        | 10.20 Percent                  |
| Khandasari Sugar (Sulphur and Non-sulphur)<br>from standard Gur Refined | 46 Percent                     |
| Molasses from Cane Crushed                                              | 4.0 Percent to 4.5 Percent     |
| Cane - Trash* from Cane Harvested                                       | 8.0 Percent to 12.0 Percent    |
| <b>Lac</b>                                                              |                                |
| Seed Lac                                                                | 66.0 Percent of Stick Lac      |
| Shell Lac                                                               | 57.4 Percent of Stick Lac      |
| <b>Cashewnut</b>                                                        |                                |
| Cashew Kernel                                                           | 25 Percent of Cashewnuts       |

\* This consists of leaves and portion of the top of stalk which are removed from the canestalk, while harvesting and before sending the cane for milling.

### A.3 : Seed Rate of Sowing for Important Field Crops

(Kg/ ha)

| Crop                         | Variety Seed Rate                                                    | Hybrid Seed Rate                                                                   |
|------------------------------|----------------------------------------------------------------------|------------------------------------------------------------------------------------|
| (1)                          | (2)                                                                  | (3)                                                                                |
| <b>Cereals</b>               |                                                                      |                                                                                    |
| Rice                         | 35-40                                                                | 12-15 for normal planting<br>5 under System of Rice Intensification (SRI) planting |
| Wheat                        | 100                                                                  |                                                                                    |
| Barley                       | 100                                                                  |                                                                                    |
| Sorghum                      | Grain Rabi 8-10; Grain Kharif 10                                     | 7.5                                                                                |
| Pearl Millet                 | 4-5                                                                  | 42494.00                                                                           |
| Maize                        | 18-20                                                                | 20                                                                                 |
| Ragi                         | 10-12.5                                                              | 10-12.5                                                                            |
| <b>Pulses</b>                |                                                                      |                                                                                    |
| Pigeon pea                   | Early duration 17-19<br>Medium duration 15-17<br>Long duration 12-15 |                                                                                    |
| Chickpea(Large seeded)       | 75-100                                                               |                                                                                    |
| Chickpea Desi (small seeded) | 65-75                                                                |                                                                                    |
| Chickpea Kabuli              | 100-120                                                              |                                                                                    |
| Mungbean                     | Kharif-20, Rabi 25-30, Summer 30-35                                  |                                                                                    |
| Urdbean                      | Kharif-20, Rabi 25-30, Summer 30-35                                  |                                                                                    |
| Fieldpea                     | 80-100                                                               |                                                                                    |
| Lentil                       | 50-60                                                                |                                                                                    |
| Rajmash                      | 75-100                                                               |                                                                                    |
| Mothbean                     | 15-18                                                                |                                                                                    |
| Kulthi                       | 22-30                                                                |                                                                                    |
| <b>Oilseeds</b>              |                                                                      |                                                                                    |
| Groundnut                    | 140-160                                                              |                                                                                    |
| Rapeseed & Mustard           | 3-5                                                                  | 3.5                                                                                |
| Soybean                      | 65-75                                                                |                                                                                    |
| Sunflower                    | 5                                                                    | 5                                                                                  |
| Sesame                       | 5                                                                    |                                                                                    |
| Niger                        | 5                                                                    |                                                                                    |
| Safflower                    | 7                                                                    |                                                                                    |
| Linseed                      | 30 for seed type<br>45 for dual purpose type                         |                                                                                    |
| Castor                       | 5                                                                    | 5                                                                                  |

(Contd..)

| Crop<br>(1)         | Variety Seed Rate<br>(2)                                                                        | Hybrid Seed Rate<br>(3)                |
|---------------------|-------------------------------------------------------------------------------------------------|----------------------------------------|
| <b>Forage crops</b> |                                                                                                 |                                        |
| Sorghum             | 25 in small seeded varieties;<br>40 in bold seeded varieties                                    |                                        |
| Maize               | 30                                                                                              |                                        |
| Guar                | 20                                                                                              |                                        |
| Pearl Millet        | 20                                                                                              |                                        |
| Oats                | 70                                                                                              |                                        |
| Berseem             | 20-25                                                                                           |                                        |
| Gobhi Sarson        | 4                                                                                               |                                        |
| Lucerne             | 15                                                                                              |                                        |
| <b>Fibre Crops</b>  |                                                                                                 |                                        |
| Cotton              | 10-12                                                                                           | Bt. Cotton - 2.25<br>Non-Bt. Cotton 10 |
| Jute                | 5 (olitorius), 7 (capsularis)                                                                   |                                        |
| Sunhemp             | 25                                                                                              |                                        |
| Mesta               | 12                                                                                              |                                        |
| <b>Sugar Crops</b>  |                                                                                                 |                                        |
| Sugarcane           | 60 qtls.<br>(40,000 setts of 3 buds in sub tropics)<br>(20,000-25000 sets of 3 buds in tropics) | -                                      |

Source:- Indian Council of Agricultural Research (ICAR)

## **A.4: Rainfall Position in India during 2017**

### **1) Rainfall during 2017 (January – December, 2017)**

In 2017, the rainfall (January to December, 2017) over the country as a whole was 94% of Long Period Average (LPA). Out of 36 meteorological subdivisions, 29 received excess/normal rainfall and 07 received deficient rainfall. Season wise rainfall distribution over the country as a whole was as follows:

|                                                 |                   |
|-------------------------------------------------|-------------------|
| <b>Winter (January to February 2017):</b>       | <b>95% of LPA</b> |
| <b>Pre-monsoon (March to May 2017):</b>         | <b>98% of LPA</b> |
| <b>Monsoon (June to September 2017):</b>        | <b>95% of LPA</b> |
| <b>Post-Monsoon (October to December 2017):</b> | <b>89% of LPA</b> |

#### **Season-wise Performance**

##### **Winter Season (January- February 2017)**

During the winter season rainfall activity over the country as a whole was 95% of the LPA rainfall. At met sub-division level, 05 subdivisions received large excess/excess rainfall, 05 subdivisions received normal rainfall, 08 received deficient, 12 received large deficient rainfall and 06 received no rainfall out of 36 met sub-divisions.

##### **Pre-Monsoon Season (March- May 2017)**

Rainfall activity during the Pre-monsoon season over the country as a whole was recorded normal at 98% of LPA rainfall. Out of 36 meteorological sub-divisions, 05 received large excess/excess rainfall, 13 received normal rainfall, 15 received deficient rainfall and 03 met sub-divisions received large deficient rainfall.

##### **Monsoon Season (June-September 2017)**

During the monsoon season for the country as a whole, rainfall was 95% of its Long Period Average (LPA). Seasonal rainfall was 90% of LPA over Northwest India, 94% of its LPA over Central India, 96% of its LPA over East and Northeast (NE) India and equal to LPA in south Peninsula. At met sub-division level, out of 36 met sub-divisions, 05 met sub-divisions received excess rainfall, 25 sub-divisions received normal rainfall and 06 sub-divisions received deficient rainfall. Excess/normal rainfall sub-divisions covered 83% of the geographical area of the country. Out of 630 districts for which rainfall data were available, 23 districts (4%) received large excess rainfall, 79 districts (12%) received excess rainfall, 313 districts (50%) normal rainfall, 207 districts (33%) deficient rainfall and 08 districts (1%) received large deficient rainfall.

##### **Post-Monsoon Season (October- December 2017)**

Rainfall activity during the Post-monsoon season for the country as a whole was recorded deficit rainfall with 89% of LPA. Out of 36 meteorological sub-divisions, 05 subdivisions received large excess/excess rainfall, 14 received normal rainfall 08 received deficient rainfall and 09 met sub-divisions received large deficient rainfall.

## A.5 : Major Economic Groups/ Institutions

| Group/ Institution<br>(1)                                                                | Member Countries<br>(2)                                                                                                                                                                                                  |
|------------------------------------------------------------------------------------------|--------------------------------------------------------------------------------------------------------------------------------------------------------------------------------------------------------------------------|
| Association of Southeast Asian Nations (ASEAN)                                           | Brunei Darussalam, Cambodia, Indonesia, Lao PDR, Malaysia, Philippines, Singapore, Thailand, Vietnam                                                                                                                     |
| BASIC Countries                                                                          | Brazil, South Africa, India and China                                                                                                                                                                                    |
| Bay of Bengal Initiative for Multi-Sectoral Technical and Economic Cooperation (BIMSTEC) | Bangladesh, India, Myanmar, Sri Lanka, Thailand, Bhutan, and Nepal                                                                                                                                                       |
| BRICS Economies                                                                          | Brazil, Russian Federation, India, China, South Africa                                                                                                                                                                   |
| Association of Southeast Asian Nations (ASEAN)                                           | Brunei Darussalam, Cambodia, Indonesia, Lao PDR, Malaysia, Philippines, Singapore, Thailand, Vietnam                                                                                                                     |
| Group of Four (G-4)                                                                      | Brazil, Germany, India, and Japan                                                                                                                                                                                        |
| Group of Eight (G-8)                                                                     | Canada, France, Germany, Italy, Japan, Russia, United Kingdom, USA, European Union*                                                                                                                                      |
| Group of Twenty (G-20)                                                                   | Australia, Brazil, Canada, France, Germany, India, Indonesia, Italy, Japan, Mexico, Russian Federation, South Africa, Turkey, United Kingdom, United States, Argentina, China, South Korea, European Union, Saudi Arabia |
| South Asian Association for Regional Cooperation (SAARC)                                 | Afghanistan, Bangladesh, Bhutan, India, Maldives, Nepal, Pakistan, Sri Lanka                                                                                                                                             |

\* EU is represented within the G8 but cannot host or chair summits

Note: Since 2014, the G8 effectively comprises seven nations and the European Union as the eighth member.

© Directorate of Economics & Statistics, Government of India

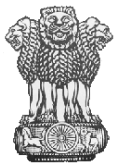

Government of India

Ministry of Agriculture & Farmers Welfare

Department of Agriculture, Cooperation & Farmers Welfare

Directorate of Economics & Statistics

New Delhi
